# Supplementary material for: Characterisation of the transcriptome and proteome of SARS-CoV-2 using direct RNA sequencing and tandem mass spectrometry reveals evidence for a cell passage induced in-frame deletion in the spike glycoprotein that removes the furin-like cleavage site
Source: bioRxiv preprint, doi:10.1101/2020.03.22.002204, version 1 (2020-03-24)
Supplement: Supplementary dataset 5 [file 002204_file04.xlsx]

## Sheet: 2020-03-18Covid19 Peptide summa
MasterProteinName	ContributingPSMs	PositioninProt.begin	PositioninProt.end	Sequence	ProtFullAAseq	Protein.Accessions
polyA_is_-1_del_spike_S1	130	22	34	TQLPPAYTNSFTR	MFVFLVLLPLVSSQCVNLTTRTQLPPAYTNSFTRGVYYPDKVFRSSVLHSTQDLFLPFFSNVTWFHAIHVSGTNGTKRFDNPVLPFNDGVYFASTEKSNIIRGWIFGTTLDSKTQSLLIVNNATNVVIKVCEFQFCNDPFLGVYYHKNNKSWMESEFRVYSSANNCTFEYVSQPFLMDLEGKQGNFKNLREFVFKNIDGYFKIYSKHTPINLVRDLPQGFSALEPLVDLPIGINITRFQTLLALHRSYLTPGDSSSGWTAGAAAYYVGYLQPRTFLLKYNENGTITDAVDCALDPLSETKCTLKSFTVEKGIYQTSNFRVQPTESIVRFPNITNLCPFGEVFNATRFASVYAWNRKRISNCVADYSVLYNSASFSTFKCYGVSPTKLNDLCFTNVYADS…	mRNA#7535_2_copies:polyA_is_-1 coordinates are BetaCoV/England/02/2020; mRNA#29484_1_copies:polyA_is_-1 coordinates are BetaCoV/England/02/2020; mRNA#40525_1_copies:polyA_is_-1 coordinates are BetaCoV/England/02/2020; mRNA#24671_1_copies:polyA_is_-1 coordinates are BetaCoV/England/02/2020; mRNA#27174_1_copies:polyA_is_-1 coordinates are BetaCoV/England/02/2020; mRNA#41459_1_copies:polyA_is_-1 coo…
polyA_is_-1_del_spike_S1	5	35	41	GVYYPDK	MFVFLVLLPLVSSQCVNLTTRTQLPPAYTNSFTRGVYYPDKVFRSSVLHSTQDLFLPFFSNVTWFHAIHVSGTNGTKRFDNPVLPFNDGVYFASTEKSNIIRGWIFGTTLDSKTQSLLIVNNATNVVIKVCEFQFCNDPFLGVYYHKNNKSWMESEFRVYSSANNCTFEYVSQPFLMDLEGKQGNFKNLREFVFKNIDGYFKIYSKHTPINLVRDLPQGFSALEPLVDLPIGINITRFQTLLALHRSYLTPGDSSSGWTAGAAAYYVGYLQPRTFLLKYNENGTITDAVDCALDPLSETKCTLKSFTVEKGIYQTSNFRVQPTESIVRFPNITNLCPFGEVFNATRFASVYAWNRKRISNCVADYSVLYNSASFSTFKCYGVSPTKLNDLCFTNVYADS…	mRNA#7535_2_copies:polyA_is_-1 coordinates are BetaCoV/England/02/2020; mRNA#29484_1_copies:polyA_is_-1 coordinates are BetaCoV/England/02/2020; mRNA#40525_1_copies:polyA_is_-1 coordinates are BetaCoV/England/02/2020; mRNA#24671_1_copies:polyA_is_-1 coordinates are BetaCoV/England/02/2020; mRNA#41459_1_copies:polyA_is_-1 coordinates are BetaCoV/England/02/2020; mRNA#8531_2_copies:polyA_is_-1 coor…
polyA_is_-1_del_spike_S1	19	35	44	GVYYPDKVFR	MFVFLVLLPLVSSQCVNLTTRTQLPPAYTNSFTRGVYYPDKVFRSSVLHSTQDLFLPFFSNVTWFHAIHVSGTNGTKRFDNPVLPFNDGVYFASTEKSNIIRGWIFGTTLDSKTQSLLIVNNATNVVIKVCEFQFCNDPFLGVYYHKNNKSWMESEFRVYSSANNCTFEYVSQPFLMDLEGKQGNFKNLREFVFKNIDGYFKIYSKHTPINLVRDLPQGFSALEPLVDLPIGINITRFQTLLALHRSYLTPGDSSSGWTAGAAAYYVGYLQPRTFLLKYNENGTITDAVDCALDPLSETKCTLKSFTVEKGIYQTSNFRVQPTESIVRFPNITNLCPFGEVFNATRFASVYAWNRKRISNCVADYSVLYNSASFSTFKCYGVSPTKLNDLCFTNVYADS…	mRNA#7535_2_copies:polyA_is_-1 coordinates are BetaCoV/England/02/2020; mRNA#29484_1_copies:polyA_is_-1 coordinates are BetaCoV/England/02/2020; mRNA#40525_1_copies:polyA_is_-1 coordinates are BetaCoV/England/02/2020; mRNA#24671_1_copies:polyA_is_-1 coordinates are BetaCoV/England/02/2020; mRNA#41459_1_copies:polyA_is_-1 coordinates are BetaCoV/England/02/2020; mRNA#8531_2_copies:polyA_is_-1 coor…
polyA_is_-1_del_spike_S1	46	78	97	RFDNPVLPFNDGVYFASTEK	MFVFLVLLPLVSSQCVNLTTRTQLPPAYTNSFTRGVYYPDKVFRSSVLHSTQDLFLPFFSNVTWFHAIHVSGTNGTKRFDNPVLPFNDGVYFASTEKSNIIRGWIFGTTLDSKTQSLLIVNNATNVVIKVCEFQFCNDPFLGVYYHKNNKSWMESEFRVYSSANNCTFEYVSQPFLMDLEGKQGNFKNLREFVFKNIDGYFKIYSKHTPINLVRDLPQGFSALEPLVDLPIGINITRFQTLLALHRSYLTPGDSSSGWTAGAAAYYVGYLQPRTFLLKYNENGTITDAVDCALDPLSETKCTLKSFTVEKGIYQTSNFRVQPTESIVRFPNITNLCPFGEVFNATRFASVYAWNRKRISNCVADYSVLYNSASFSTFKCYGVSPTKLNDLCFTNVYADS…	mRNA#47136_1_copies:polyA_is_-1 coordinates are BetaCoV/England/02/2020; mRNA#7535_2_copies:polyA_is_-1 coordinates are BetaCoV/England/02/2020; mRNA#45295_1_copies:polyA_is_-1 coordinates are BetaCoV/England/02/2020; mRNA#29484_1_copies:polyA_is_-1 coordinates are BetaCoV/England/02/2020; mRNA#40525_1_copies:polyA_is_-1 coordinates are BetaCoV/England/02/2020; mRNA#24671_1_copies:polyA_is_-1 coo…
polyA_is_-1_del_spike_S1	61	79	97	FDNPVLPFNDGVYFASTEK	MFVFLVLLPLVSSQCVNLTTRTQLPPAYTNSFTRGVYYPDKVFRSSVLHSTQDLFLPFFSNVTWFHAIHVSGTNGTKRFDNPVLPFNDGVYFASTEKSNIIRGWIFGTTLDSKTQSLLIVNNATNVVIKVCEFQFCNDPFLGVYYHKNNKSWMESEFRVYSSANNCTFEYVSQPFLMDLEGKQGNFKNLREFVFKNIDGYFKIYSKHTPINLVRDLPQGFSALEPLVDLPIGINITRFQTLLALHRSYLTPGDSSSGWTAGAAAYYVGYLQPRTFLLKYNENGTITDAVDCALDPLSETKCTLKSFTVEKGIYQTSNFRVQPTESIVRFPNITNLCPFGEVFNATRFASVYAWNRKRISNCVADYSVLYNSASFSTFKCYGVSPTKLNDLCFTNVYADS…	mRNA#47136_1_copies:polyA_is_-1 coordinates are BetaCoV/England/02/2020; mRNA#7535_2_copies:polyA_is_-1 coordinates are BetaCoV/England/02/2020; mRNA#45295_1_copies:polyA_is_-1 coordinates are BetaCoV/England/02/2020; mRNA#29484_1_copies:polyA_is_-1 coordinates are BetaCoV/England/02/2020; mRNA#40525_1_copies:polyA_is_-1 coordinates are BetaCoV/England/02/2020; mRNA#24671_1_copies:polyA_is_-1 coo…
polyA_is_-1_del_spike_S1	45	103	113	GWIFGTTLDSK	MFVFLVLLPLVSSQCVNLTTRTQLPPAYTNSFTRGVYYPDKVFRSSVLHSTQDLFLPFFSNVTWFHAIHVSGTNGTKRFDNPVLPFNDGVYFASTEKSNIIRGWIFGTTLDSKTQSLLIVNNATNVVIKVCEFQFCNDPFLGVYYHKNNKSWMESEFRVYSSANNCTFEYVSQPFLMDLEGKQGNFKNLREFVFKNIDGYFKIYSKHTPINLVRDLPQGFSALEPLVDLPIGINITRFQTLLALHRSYLTPGDSSSGWTAGAAAYYVGYLQPRTFLLKYNENGTITDAVDCALDPLSETKCTLKSFTVEKGIYQTSNFRVQPTESIVRFPNITNLCPFGEVFNATRFASVYAWNRKRISNCVADYSVLYNSASFSTFKCYGVSPTKLNDLCFTNVYADS…	mRNA#47136_1_copies:polyA_is_-1 coordinates are BetaCoV/England/02/2020; mRNA#7535_2_copies:polyA_is_-1 coordinates are BetaCoV/England/02/2020; mRNA#45295_1_copies:polyA_is_-1 coordinates are BetaCoV/England/02/2020; mRNA#29484_1_copies:polyA_is_-1 coordinates are BetaCoV/England/02/2020; mRNA#40525_1_copies:polyA_is_-1 coordinates are BetaCoV/England/02/2020; mRNA#24671_1_copies:polyA_is_-1 coo…
polyA_is_-1_del_spike_S1	1	114	129	TQSLLIVNNATNVVIK	MFVFLVLLPLVSSQCVNLTTRTQLPPAYTNSFTRGVYYPDKVFRSSVLHSTQDLFLPFFSNVTWFHAIHVSGTNGTKRFDNPVLPFNDGVYFASTEKSNIIRGWIFGTTLDSKTQSLLIVNNATNVVIKVCEFQFCNDPFLGVYYHKNNKSWMESEFRVYSSANNCTFEYVSQPFLMDLEGKQGNFKNLREFVFKNIDGYFKIYSKHTPINLVRDLPQGFSALEPLVDLPIGINITRFQTLLALHRSYLTPGDSSSGWTAGAAAYYVGYLQPRTFLLKYNENGTITDAVDCALDPLSETKCTLKSFTVEKGIYQTSNFRVQPTESIVRFPNITNLCPFGEVFNATRFASVYAWNRKRISNCVADYSVLYNSASFSTFKCYGVSPTKLNDLCFTNVYADS…	mRNA#47136_1_copies:polyA_is_-1 coordinates are BetaCoV/England/02/2020; mRNA#7535_2_copies:polyA_is_-1 coordinates are BetaCoV/England/02/2020; mRNA#45295_1_copies:polyA_is_-1 coordinates are BetaCoV/England/02/2020; mRNA#29484_1_copies:polyA_is_-1 coordinates are BetaCoV/England/02/2020; mRNA#40525_1_copies:polyA_is_-1 coordinates are BetaCoV/England/02/2020; mRNA#24671_1_copies:polyA_is_-1 coo…
polyA_is_-1_del_spike_S1	22	130	147	VCEFQFCNDPFLGVYYHK	MFVFLVLLPLVSSQCVNLTTRTQLPPAYTNSFTRGVYYPDKVFRSSVLHSTQDLFLPFFSNVTWFHAIHVSGTNGTKRFDNPVLPFNDGVYFASTEKSNIIRGWIFGTTLDSKTQSLLIVNNATNVVIKVCEFQFCNDPFLGVYYHKNNKSWMESEFRVYSSANNCTFEYVSQPFLMDLEGKQGNFKNLREFVFKNIDGYFKIYSKHTPINLVRDLPQGFSALEPLVDLPIGINITRFQTLLALHRSYLTPGDSSSGWTAGAAAYYVGYLQPRTFLLKYNENGTITDAVDCALDPLSETKCTLKSFTVEKGIYQTSNFRVQPTESIVRFPNITNLCPFGEVFNATRFASVYAWNRKRISNCVADYSVLYNSASFSTFKCYGVSPTKLNDLCFTNVYADS…	mRNA#47136_1_copies:polyA_is_-1 coordinates are BetaCoV/England/02/2020; mRNA#7535_2_copies:polyA_is_-1 coordinates are BetaCoV/England/02/2020; mRNA#45295_1_copies:polyA_is_-1 coordinates are BetaCoV/England/02/2020; mRNA#29484_1_copies:polyA_is_-1 coordinates are BetaCoV/England/02/2020; mRNA#40525_1_copies:polyA_is_-1 coordinates are BetaCoV/England/02/2020; mRNA#24671_1_copies:polyA_is_-1 coo…
polyA_is_-1_del_spike_S1	102	151	158	SWMESEFR	MFVFLVLLPLVSSQCVNLTTRTQLPPAYTNSFTRGVYYPDKVFRSSVLHSTQDLFLPFFSNVTWFHAIHVSGTNGTKRFDNPVLPFNDGVYFASTEKSNIIRGWIFGTTLDSKTQSLLIVNNATNVVIKVCEFQFCNDPFLGVYYHKNNKSWMESEFRVYSSANNCTFEYVSQPFLMDLEGKQGNFKNLREFVFKNIDGYFKIYSKHTPINLVRDLPQGFSALEPLVDLPIGINITRFQTLLALHRSYLTPGDSSSGWTAGAAAYYVGYLQPRTFLLKYNENGTITDAVDCALDPLSETKCTLKSFTVEKGIYQTSNFRVQPTESIVRFPNITNLCPFGEVFNATRFASVYAWNRKRISNCVADYSVLYNSASFSTFKCYGVSPTKLNDLCFTNVYADS…	mRNA#47136_1_copies:polyA_is_-1 coordinates are BetaCoV/England/02/2020; mRNA#7535_2_copies:polyA_is_-1 coordinates are BetaCoV/England/02/2020; mRNA#45295_1_copies:polyA_is_-1 coordinates are BetaCoV/England/02/2020; mRNA#29484_1_copies:polyA_is_-1 coordinates are BetaCoV/England/02/2020; mRNA#40525_1_copies:polyA_is_-1 coordinates are BetaCoV/England/02/2020; mRNA#24671_1_copies:polyA_is_-1 coo…
polyA_is_-1_del_spike_S1	2	191	202	EFVFKNIDGYFK	MFVFLVLLPLVSSQCVNLTTRTQLPPAYTNSFTRGVYYPDKVFRSSVLHSTQDLFLPFFSNVTWFHAIHVSGTNGTKRFDNPVLPFNDGVYFASTEKSNIIRGWIFGTTLDSKTQSLLIVNNATNVVIKVCEFQFCNDPFLGVYYHKNNKSWMESEFRVYSSANNCTFEYVSQPFLMDLEGKQGNFKNLREFVFKNIDGYFKIYSKHTPINLVRDLPQGFSALEPLVDLPIGINITRFQTLLALHRSYLTPGDSSSGWTAGAAAYYVGYLQPRTFLLKYNENGTITDAVDCALDPLSETKCTLKSFTVEKGIYQTSNFRVQPTESIVRFPNITNLCPFGEVFNATRFASVYAWNRKRISNCVADYSVLYNSASFSTFKCYGVSPTKLNDLCFTNVYADS…	mRNA#47136_1_copies:polyA_is_-1 coordinates are BetaCoV/England/02/2020; mRNA#55318_1_copies:polyA_is_-1 coordinates are BetaCoV/England/02/2020; mRNA#7535_2_copies:polyA_is_-1 coordinates are BetaCoV/England/02/2020; mRNA#56131_1_copies:polyA_is_-1 coordinates are BetaCoV/England/02/2020; mRNA#45295_1_copies:polyA_is_-1 coordinates are BetaCoV/England/02/2020; mRNA#29484_1_copies:polyA_is_-1 coo…
polyA_is_-1_del_spike_S1	30	196	202	NIDGYFK	MFVFLVLLPLVSSQCVNLTTRTQLPPAYTNSFTRGVYYPDKVFRSSVLHSTQDLFLPFFSNVTWFHAIHVSGTNGTKRFDNPVLPFNDGVYFASTEKSNIIRGWIFGTTLDSKTQSLLIVNNATNVVIKVCEFQFCNDPFLGVYYHKNNKSWMESEFRVYSSANNCTFEYVSQPFLMDLEGKQGNFKNLREFVFKNIDGYFKIYSKHTPINLVRDLPQGFSALEPLVDLPIGINITRFQTLLALHRSYLTPGDSSSGWTAGAAAYYVGYLQPRTFLLKYNENGTITDAVDCALDPLSETKCTLKSFTVEKGIYQTSNFRVQPTESIVRFPNITNLCPFGEVFNATRFASVYAWNRKRISNCVADYSVLYNSASFSTFKCYGVSPTKLNDLCFTNVYADS…	mRNA#47136_1_copies:polyA_is_-1 coordinates are BetaCoV/England/02/2020; mRNA#55318_1_copies:polyA_is_-1 coordinates are BetaCoV/England/02/2020; mRNA#7535_2_copies:polyA_is_-1 coordinates are BetaCoV/England/02/2020; mRNA#56131_1_copies:polyA_is_-1 coordinates are BetaCoV/England/02/2020; mRNA#45295_1_copies:polyA_is_-1 coordinates are BetaCoV/England/02/2020; mRNA#29484_1_copies:polyA_is_-1 coo…
polyA_is_-1_del_spike_S1	32	207	214	HTPINLVR	MFVFLVLLPLVSSQCVNLTTRTQLPPAYTNSFTRGVYYPDKVFRSSVLHSTQDLFLPFFSNVTWFHAIHVSGTNGTKRFDNPVLPFNDGVYFASTEKSNIIRGWIFGTTLDSKTQSLLIVNNATNVVIKVCEFQFCNDPFLGVYYHKNNKSWMESEFRVYSSANNCTFEYVSQPFLMDLEGKQGNFKNLREFVFKNIDGYFKIYSKHTPINLVRDLPQGFSALEPLVDLPIGINITRFQTLLALHRSYLTPGDSSSGWTAGAAAYYVGYLQPRTFLLKYNENGTITDAVDCALDPLSETKCTLKSFTVEKGIYQTSNFRVQPTESIVRFPNITNLCPFGEVFNATRFASVYAWNRKRISNCVADYSVLYNSASFSTFKCYGVSPTKLNDLCFTNVYADS…	mRNA#47136_1_copies:polyA_is_-1 coordinates are BetaCoV/England/02/2020; mRNA#55318_1_copies:polyA_is_-1 coordinates are BetaCoV/England/02/2020; mRNA#7535_2_copies:polyA_is_-1 coordinates are BetaCoV/England/02/2020; mRNA#56131_1_copies:polyA_is_-1 coordinates are BetaCoV/England/02/2020; mRNA#45295_1_copies:polyA_is_-1 coordinates are BetaCoV/England/02/2020; mRNA#29484_1_copies:polyA_is_-1 coo…
polyA_is_-1_del_spike_S1	45	238	246	FQTLLALHR	MFVFLVLLPLVSSQCVNLTTRTQLPPAYTNSFTRGVYYPDKVFRSSVLHSTQDLFLPFFSNVTWFHAIHVSGTNGTKRFDNPVLPFNDGVYFASTEKSNIIRGWIFGTTLDSKTQSLLIVNNATNVVIKVCEFQFCNDPFLGVYYHKNNKSWMESEFRVYSSANNCTFEYVSQPFLMDLEGKQGNFKNLREFVFKNIDGYFKIYSKHTPINLVRDLPQGFSALEPLVDLPIGINITRFQTLLALHRSYLTPGDSSSGWTAGAAAYYVGYLQPRTFLLKYNENGTITDAVDCALDPLSETKCTLKSFTVEKGIYQTSNFRVQPTESIVRFPNITNLCPFGEVFNATRFASVYAWNRKRISNCVADYSVLYNSASFSTFKCYGVSPTKLNDLCFTNVYADS…	mRNA#47136_1_copies:polyA_is_-1 coordinates are BetaCoV/England/02/2020; mRNA#55318_1_copies:polyA_is_-1 coordinates are BetaCoV/England/02/2020; mRNA#7535_2_copies:polyA_is_-1 coordinates are BetaCoV/England/02/2020; mRNA#56131_1_copies:polyA_is_-1 coordinates are BetaCoV/England/02/2020; mRNA#57692_1_copies:polyA_is_-1 coordinates are BetaCoV/England/02/2020; mRNA#45295_1_copies:polyA_is_-1 coo…
polyA_is_-1_del_spike_S1	32	247	273	SYLTPGDSSSGWTAGAAAYYVGYLQPR	MFVFLVLLPLVSSQCVNLTTRTQLPPAYTNSFTRGVYYPDKVFRSSVLHSTQDLFLPFFSNVTWFHAIHVSGTNGTKRFDNPVLPFNDGVYFASTEKSNIIRGWIFGTTLDSKTQSLLIVNNATNVVIKVCEFQFCNDPFLGVYYHKNNKSWMESEFRVYSSANNCTFEYVSQPFLMDLEGKQGNFKNLREFVFKNIDGYFKIYSKHTPINLVRDLPQGFSALEPLVDLPIGINITRFQTLLALHRSYLTPGDSSSGWTAGAAAYYVGYLQPRTFLLKYNENGTITDAVDCALDPLSETKCTLKSFTVEKGIYQTSNFRVQPTESIVRFPNITNLCPFGEVFNATRFASVYAWNRKRISNCVADYSVLYNSASFSTFKCYGVSPTKLNDLCFTNVYADS…	mRNA#58235_1_copies:polyA_is_-1 coordinates are BetaCoV/England/02/2020; mRNA#47136_1_copies:polyA_is_-1 coordinates are BetaCoV/England/02/2020; mRNA#55318_1_copies:polyA_is_-1 coordinates are BetaCoV/England/02/2020; mRNA#7535_2_copies:polyA_is_-1 coordinates are BetaCoV/England/02/2020; mRNA#56131_1_copies:polyA_is_-1 coordinates are BetaCoV/England/02/2020; mRNA#58964_1_copies:polyA_is_-1 coo…
polyA_is_-1_del_spike_S1	4	279	300	YNENGTITDAVDCALDPLSETK	MFVFLVLLPLVSSQCVNLTTRTQLPPAYTNSFTRGVYYPDKVFRSSVLHSTQDLFLPFFSNVTWFHAIHVSGTNGTKRFDNPVLPFNDGVYFASTEKSNIIRGWIFGTTLDSKTQSLLIVNNATNVVIKVCEFQFCNDPFLGVYYHKNNKSWMESEFRVYSSANNCTFEYVSQPFLMDLEGKQGNFKNLREFVFKNIDGYFKIYSKHTPINLVRDLPQGFSALEPLVDLPIGINITRFQTLLALHRSYLTPGDSSSGWTAGAAAYYVGYLQPRTFLLKYNENGTITDAVDCALDPLSETKCTLKSFTVEKGIYQTSNFRVQPTESIVRFPNITNLCPFGEVFNATRFASVYAWNRKRISNCVADYSVLYNSASFSTFKCYGVSPTKLNDLCFTNVYADS…	mRNA#58235_1_copies:polyA_is_-1 coordinates are BetaCoV/England/02/2020; mRNA#47136_1_copies:polyA_is_-1 coordinates are BetaCoV/England/02/2020; mRNA#55318_1_copies:polyA_is_-1 coordinates are BetaCoV/England/02/2020; mRNA#7535_2_copies:polyA_is_-1 coordinates are BetaCoV/England/02/2020; mRNA#56131_1_copies:polyA_is_-1 coordinates are BetaCoV/England/02/2020; mRNA#58964_1_copies:polyA_is_-1 coo…
polyA_is_-1_del_spike_S1	1	301	310	CTLKSFTVEK	MFVFLVLLPLVSSQCVNLTTRTQLPPAYTNSFTRGVYYPDKVFRSSVLHSTQDLFLPFFSNVTWFHAIHVSGTNGTKRFDNPVLPFNDGVYFASTEKSNIIRGWIFGTTLDSKTQSLLIVNNATNVVIKVCEFQFCNDPFLGVYYHKNNKSWMESEFRVYSSANNCTFEYVSQPFLMDLEGKQGNFKNLREFVFKNIDGYFKIYSKHTPINLVRDLPQGFSALEPLVDLPIGINITRFQTLLALHRSYLTPGDSSSGWTAGAAAYYVGYLQPRTFLLKYNENGTITDAVDCALDPLSETKCTLKSFTVEKGIYQTSNFRVQPTESIVRFPNITNLCPFGEVFNATRFASVYAWNRKRISNCVADYSVLYNSASFSTFKCYGVSPTKLNDLCFTNVYADS…	mRNA#58235_1_copies:polyA_is_-1 coordinates are BetaCoV/England/02/2020; mRNA#47136_1_copies:polyA_is_-1 coordinates are BetaCoV/England/02/2020; mRNA#55318_1_copies:polyA_is_-1 coordinates are BetaCoV/England/02/2020; mRNA#7535_2_copies:polyA_is_-1 coordinates are BetaCoV/England/02/2020; mRNA#58964_1_copies:polyA_is_-1 coordinates are BetaCoV/England/02/2020; mRNA#45295_1_copies:polyA_is_-1 coo…
polyA_is_-1_del_spike_S1	1	305	319	SFTVEKGIYQTSNFR	MFVFLVLLPLVSSQCVNLTTRTQLPPAYTNSFTRGVYYPDKVFRSSVLHSTQDLFLPFFSNVTWFHAIHVSGTNGTKRFDNPVLPFNDGVYFASTEKSNIIRGWIFGTTLDSKTQSLLIVNNATNVVIKVCEFQFCNDPFLGVYYHKNNKSWMESEFRVYSSANNCTFEYVSQPFLMDLEGKQGNFKNLREFVFKNIDGYFKIYSKHTPINLVRDLPQGFSALEPLVDLPIGINITRFQTLLALHRSYLTPGDSSSGWTAGAAAYYVGYLQPRTFLLKYNENGTITDAVDCALDPLSETKCTLKSFTVEKGIYQTSNFRVQPTESIVRFPNITNLCPFGEVFNATRFASVYAWNRKRISNCVADYSVLYNSASFSTFKCYGVSPTKLNDLCFTNVYADS…	mRNA#58235_1_copies:polyA_is_-1 coordinates are BetaCoV/England/02/2020; mRNA#47136_1_copies:polyA_is_-1 coordinates are BetaCoV/England/02/2020; mRNA#55318_1_copies:polyA_is_-1 coordinates are BetaCoV/England/02/2020; mRNA#7535_2_copies:polyA_is_-1 coordinates are BetaCoV/England/02/2020; mRNA#58964_1_copies:polyA_is_-1 coordinates are BetaCoV/England/02/2020; mRNA#45295_1_copies:polyA_is_-1 coo…
polyA_is_-1_del_spike_S1	22	311	319	GIYQTSNFR	MFVFLVLLPLVSSQCVNLTTRTQLPPAYTNSFTRGVYYPDKVFRSSVLHSTQDLFLPFFSNVTWFHAIHVSGTNGTKRFDNPVLPFNDGVYFASTEKSNIIRGWIFGTTLDSKTQSLLIVNNATNVVIKVCEFQFCNDPFLGVYYHKNNKSWMESEFRVYSSANNCTFEYVSQPFLMDLEGKQGNFKNLREFVFKNIDGYFKIYSKHTPINLVRDLPQGFSALEPLVDLPIGINITRFQTLLALHRSYLTPGDSSSGWTAGAAAYYVGYLQPRTFLLKYNENGTITDAVDCALDPLSETKCTLKSFTVEKGIYQTSNFRVQPTESIVRFPNITNLCPFGEVFNATRFASVYAWNRKRISNCVADYSVLYNSASFSTFKCYGVSPTKLNDLCFTNVYADS…	mRNA#58235_1_copies:polyA_is_-1 coordinates are BetaCoV/England/02/2020; mRNA#47136_1_copies:polyA_is_-1 coordinates are BetaCoV/England/02/2020; mRNA#55318_1_copies:polyA_is_-1 coordinates are BetaCoV/England/02/2020; mRNA#7535_2_copies:polyA_is_-1 coordinates are BetaCoV/England/02/2020; mRNA#58964_1_copies:polyA_is_-1 coordinates are BetaCoV/England/02/2020; mRNA#45295_1_copies:polyA_is_-1 coo…
polyA_is_-1_del_spike_S1	16	320	328	VQPTESIVR	MFVFLVLLPLVSSQCVNLTTRTQLPPAYTNSFTRGVYYPDKVFRSSVLHSTQDLFLPFFSNVTWFHAIHVSGTNGTKRFDNPVLPFNDGVYFASTEKSNIIRGWIFGTTLDSKTQSLLIVNNATNVVIKVCEFQFCNDPFLGVYYHKNNKSWMESEFRVYSSANNCTFEYVSQPFLMDLEGKQGNFKNLREFVFKNIDGYFKIYSKHTPINLVRDLPQGFSALEPLVDLPIGINITRFQTLLALHRSYLTPGDSSSGWTAGAAAYYVGYLQPRTFLLKYNENGTITDAVDCALDPLSETKCTLKSFTVEKGIYQTSNFRVQPTESIVRFPNITNLCPFGEVFNATRFASVYAWNRKRISNCVADYSVLYNSASFSTFKCYGVSPTKLNDLCFTNVYADS…	mRNA#58235_1_copies:polyA_is_-1 coordinates are BetaCoV/England/02/2020; mRNA#47136_1_copies:polyA_is_-1 coordinates are BetaCoV/England/02/2020; mRNA#55318_1_copies:polyA_is_-1 coordinates are BetaCoV/England/02/2020; mRNA#7535_2_copies:polyA_is_-1 coordinates are BetaCoV/England/02/2020; mRNA#58964_1_copies:polyA_is_-1 coordinates are BetaCoV/England/02/2020; mRNA#45295_1_copies:polyA_is_-1 coo…
polyA_is_-1_del_spike_S1	10	329	346	FPNITNLCPFGEVFNATR	MFVFLVLLPLVSSQCVNLTTRTQLPPAYTNSFTRGVYYPDKVFRSSVLHSTQDLFLPFFSNVTWFHAIHVSGTNGTKRFDNPVLPFNDGVYFASTEKSNIIRGWIFGTTLDSKTQSLLIVNNATNVVIKVCEFQFCNDPFLGVYYHKNNKSWMESEFRVYSSANNCTFEYVSQPFLMDLEGKQGNFKNLREFVFKNIDGYFKIYSKHTPINLVRDLPQGFSALEPLVDLPIGINITRFQTLLALHRSYLTPGDSSSGWTAGAAAYYVGYLQPRTFLLKYNENGTITDAVDCALDPLSETKCTLKSFTVEKGIYQTSNFRVQPTESIVRFPNITNLCPFGEVFNATRFASVYAWNRKRISNCVADYSVLYNSASFSTFKCYGVSPTKLNDLCFTNVYADS…	mRNA#58235_1_copies:polyA_is_-1 coordinates are BetaCoV/England/02/2020; mRNA#47136_1_copies:polyA_is_-1 coordinates are BetaCoV/England/02/2020; mRNA#55318_1_copies:polyA_is_-1 coordinates are BetaCoV/England/02/2020; mRNA#7535_2_copies:polyA_is_-1 coordinates are BetaCoV/England/02/2020; mRNA#58964_1_copies:polyA_is_-1 coordinates are BetaCoV/England/02/2020; mRNA#45295_1_copies:polyA_is_-1 coo…
polyA_is_-1_del_spike_S1	43	347	355	FASVYAWNR	MFVFLVLLPLVSSQCVNLTTRTQLPPAYTNSFTRGVYYPDKVFRSSVLHSTQDLFLPFFSNVTWFHAIHVSGTNGTKRFDNPVLPFNDGVYFASTEKSNIIRGWIFGTTLDSKTQSLLIVNNATNVVIKVCEFQFCNDPFLGVYYHKNNKSWMESEFRVYSSANNCTFEYVSQPFLMDLEGKQGNFKNLREFVFKNIDGYFKIYSKHTPINLVRDLPQGFSALEPLVDLPIGINITRFQTLLALHRSYLTPGDSSSGWTAGAAAYYVGYLQPRTFLLKYNENGTITDAVDCALDPLSETKCTLKSFTVEKGIYQTSNFRVQPTESIVRFPNITNLCPFGEVFNATRFASVYAWNRKRISNCVADYSVLYNSASFSTFKCYGVSPTKLNDLCFTNVYADS…	mRNA#58235_1_copies:polyA_is_-1 coordinates are BetaCoV/England/02/2020; mRNA#47136_1_copies:polyA_is_-1 coordinates are BetaCoV/England/02/2020; mRNA#69503_1_copies:polyA_is_-1 coordinates are BetaCoV/England/02/2020; mRNA#55318_1_copies:polyA_is_-1 coordinates are BetaCoV/England/02/2020; mRNA#7535_2_copies:polyA_is_-1 coordinates are BetaCoV/England/02/2020; mRNA#58964_1_copies:polyA_is_-1 coo…
polyA_is_-1_del_spike_S1	39	358	378	ISNCVADYSVLYNSASFSTFK	MFVFLVLLPLVSSQCVNLTTRTQLPPAYTNSFTRGVYYPDKVFRSSVLHSTQDLFLPFFSNVTWFHAIHVSGTNGTKRFDNPVLPFNDGVYFASTEKSNIIRGWIFGTTLDSKTQSLLIVNNATNVVIKVCEFQFCNDPFLGVYYHKNNKSWMESEFRVYSSANNCTFEYVSQPFLMDLEGKQGNFKNLREFVFKNIDGYFKIYSKHTPINLVRDLPQGFSALEPLVDLPIGINITRFQTLLALHRSYLTPGDSSSGWTAGAAAYYVGYLQPRTFLLKYNENGTITDAVDCALDPLSETKCTLKSFTVEKGIYQTSNFRVQPTESIVRFPNITNLCPFGEVFNATRFASVYAWNRKRISNCVADYSVLYNSASFSTFKCYGVSPTKLNDLCFTNVYADS…	mRNA#58235_1_copies:polyA_is_-1 coordinates are BetaCoV/England/02/2020; mRNA#47136_1_copies:polyA_is_-1 coordinates are BetaCoV/England/02/2020; mRNA#69503_1_copies:polyA_is_-1 coordinates are BetaCoV/England/02/2020; mRNA#55318_1_copies:polyA_is_-1 coordinates are BetaCoV/England/02/2020; mRNA#7535_2_copies:polyA_is_-1 coordinates are BetaCoV/England/02/2020; mRNA#58964_1_copies:polyA_is_-1 coo…
polyA_is_-1_del_spike_S1	16	379	386	CYGVSPTK	MFVFLVLLPLVSSQCVNLTTRTQLPPAYTNSFTRGVYYPDKVFRSSVLHSTQDLFLPFFSNVTWFHAIHVSGTNGTKRFDNPVLPFNDGVYFASTEKSNIIRGWIFGTTLDSKTQSLLIVNNATNVVIKVCEFQFCNDPFLGVYYHKNNKSWMESEFRVYSSANNCTFEYVSQPFLMDLEGKQGNFKNLREFVFKNIDGYFKIYSKHTPINLVRDLPQGFSALEPLVDLPIGINITRFQTLLALHRSYLTPGDSSSGWTAGAAAYYVGYLQPRTFLLKYNENGTITDAVDCALDPLSETKCTLKSFTVEKGIYQTSNFRVQPTESIVRFPNITNLCPFGEVFNATRFASVYAWNRKRISNCVADYSVLYNSASFSTFKCYGVSPTKLNDLCFTNVYADS…	mRNA#71590_1_copies:polyA_is_-1 coordinates are BetaCoV/England/02/2020; mRNA#58235_1_copies:polyA_is_-1 coordinates are BetaCoV/England/02/2020; mRNA#47136_1_copies:polyA_is_-1 coordinates are BetaCoV/England/02/2020; mRNA#69503_1_copies:polyA_is_-1 coordinates are BetaCoV/England/02/2020; mRNA#55318_1_copies:polyA_is_-1 coordinates are BetaCoV/England/02/2020; mRNA#7535_2_copies:polyA_is_-1 coo…
polyA_is_-1_del_spike_S1	25	387	403	LNDLCFTNVYADSFVIR	MFVFLVLLPLVSSQCVNLTTRTQLPPAYTNSFTRGVYYPDKVFRSSVLHSTQDLFLPFFSNVTWFHAIHVSGTNGTKRFDNPVLPFNDGVYFASTEKSNIIRGWIFGTTLDSKTQSLLIVNNATNVVIKVCEFQFCNDPFLGVYYHKNNKSWMESEFRVYSSANNCTFEYVSQPFLMDLEGKQGNFKNLREFVFKNIDGYFKIYSKHTPINLVRDLPQGFSALEPLVDLPIGINITRFQTLLALHRSYLTPGDSSSGWTAGAAAYYVGYLQPRTFLLKYNENGTITDAVDCALDPLSETKCTLKSFTVEKGIYQTSNFRVQPTESIVRFPNITNLCPFGEVFNATRFASVYAWNRKRISNCVADYSVLYNSASFSTFKCYGVSPTKLNDLCFTNVYADS…	mRNA#71590_1_copies:polyA_is_-1 coordinates are BetaCoV/England/02/2020; mRNA#58235_1_copies:polyA_is_-1 coordinates are BetaCoV/England/02/2020; mRNA#47136_1_copies:polyA_is_-1 coordinates are BetaCoV/England/02/2020; mRNA#69503_1_copies:polyA_is_-1 coordinates are BetaCoV/England/02/2020; mRNA#55318_1_copies:polyA_is_-1 coordinates are BetaCoV/England/02/2020; mRNA#7535_2_copies:polyA_is_-1 coo…
polyA_is_-1_del_spike_S1	10	387	408	LNDLCFTNVYADSFVIRGDEVR	MFVFLVLLPLVSSQCVNLTTRTQLPPAYTNSFTRGVYYPDKVFRSSVLHSTQDLFLPFFSNVTWFHAIHVSGTNGTKRFDNPVLPFNDGVYFASTEKSNIIRGWIFGTTLDSKTQSLLIVNNATNVVIKVCEFQFCNDPFLGVYYHKNNKSWMESEFRVYSSANNCTFEYVSQPFLMDLEGKQGNFKNLREFVFKNIDGYFKIYSKHTPINLVRDLPQGFSALEPLVDLPIGINITRFQTLLALHRSYLTPGDSSSGWTAGAAAYYVGYLQPRTFLLKYNENGTITDAVDCALDPLSETKCTLKSFTVEKGIYQTSNFRVQPTESIVRFPNITNLCPFGEVFNATRFASVYAWNRKRISNCVADYSVLYNSASFSTFKCYGVSPTKLNDLCFTNVYADS…	mRNA#71590_1_copies:polyA_is_-1 coordinates are BetaCoV/England/02/2020; mRNA#58235_1_copies:polyA_is_-1 coordinates are BetaCoV/England/02/2020; mRNA#47136_1_copies:polyA_is_-1 coordinates are BetaCoV/England/02/2020; mRNA#69503_1_copies:polyA_is_-1 coordinates are BetaCoV/England/02/2020; mRNA#55318_1_copies:polyA_is_-1 coordinates are BetaCoV/England/02/2020; mRNA#7535_2_copies:polyA_is_-1 coo…
polyA_is_-1_del_spike_S1	10	409	417	QIAPGQTGK	MFVFLVLLPLVSSQCVNLTTRTQLPPAYTNSFTRGVYYPDKVFRSSVLHSTQDLFLPFFSNVTWFHAIHVSGTNGTKRFDNPVLPFNDGVYFASTEKSNIIRGWIFGTTLDSKTQSLLIVNNATNVVIKVCEFQFCNDPFLGVYYHKNNKSWMESEFRVYSSANNCTFEYVSQPFLMDLEGKQGNFKNLREFVFKNIDGYFKIYSKHTPINLVRDLPQGFSALEPLVDLPIGINITRFQTLLALHRSYLTPGDSSSGWTAGAAAYYVGYLQPRTFLLKYNENGTITDAVDCALDPLSETKCTLKSFTVEKGIYQTSNFRVQPTESIVRFPNITNLCPFGEVFNATRFASVYAWNRKRISNCVADYSVLYNSASFSTFKCYGVSPTKLNDLCFTNVYADS…	mRNA#71590_1_copies:polyA_is_-1 coordinates are BetaCoV/England/02/2020; mRNA#58235_1_copies:polyA_is_-1 coordinates are BetaCoV/England/02/2020; mRNA#47136_1_copies:polyA_is_-1 coordinates are BetaCoV/England/02/2020; mRNA#69503_1_copies:polyA_is_-1 coordinates are BetaCoV/England/02/2020; mRNA#55318_1_copies:polyA_is_-1 coordinates are BetaCoV/England/02/2020; mRNA#7535_2_copies:polyA_is_-1 coo…
polyA_is_-1_del_spike_S1	2	409	424	QIAPGQTGKIADYNYK	MFVFLVLLPLVSSQCVNLTTRTQLPPAYTNSFTRGVYYPDKVFRSSVLHSTQDLFLPFFSNVTWFHAIHVSGTNGTKRFDNPVLPFNDGVYFASTEKSNIIRGWIFGTTLDSKTQSLLIVNNATNVVIKVCEFQFCNDPFLGVYYHKNNKSWMESEFRVYSSANNCTFEYVSQPFLMDLEGKQGNFKNLREFVFKNIDGYFKIYSKHTPINLVRDLPQGFSALEPLVDLPIGINITRFQTLLALHRSYLTPGDSSSGWTAGAAAYYVGYLQPRTFLLKYNENGTITDAVDCALDPLSETKCTLKSFTVEKGIYQTSNFRVQPTESIVRFPNITNLCPFGEVFNATRFASVYAWNRKRISNCVADYSVLYNSASFSTFKCYGVSPTKLNDLCFTNVYADS…	mRNA#71590_1_copies:polyA_is_-1 coordinates are BetaCoV/England/02/2020; mRNA#58235_1_copies:polyA_is_-1 coordinates are BetaCoV/England/02/2020; mRNA#47136_1_copies:polyA_is_-1 coordinates are BetaCoV/England/02/2020; mRNA#69503_1_copies:polyA_is_-1 coordinates are BetaCoV/England/02/2020; mRNA#55318_1_copies:polyA_is_-1 coordinates are BetaCoV/England/02/2020; mRNA#7535_2_copies:polyA_is_-1 coo…
polyA_is_-1_del_spike_S1	20	418	424	IADYNYK	MFVFLVLLPLVSSQCVNLTTRTQLPPAYTNSFTRGVYYPDKVFRSSVLHSTQDLFLPFFSNVTWFHAIHVSGTNGTKRFDNPVLPFNDGVYFASTEKSNIIRGWIFGTTLDSKTQSLLIVNNATNVVIKVCEFQFCNDPFLGVYYHKNNKSWMESEFRVYSSANNCTFEYVSQPFLMDLEGKQGNFKNLREFVFKNIDGYFKIYSKHTPINLVRDLPQGFSALEPLVDLPIGINITRFQTLLALHRSYLTPGDSSSGWTAGAAAYYVGYLQPRTFLLKYNENGTITDAVDCALDPLSETKCTLKSFTVEKGIYQTSNFRVQPTESIVRFPNITNLCPFGEVFNATRFASVYAWNRKRISNCVADYSVLYNSASFSTFKCYGVSPTKLNDLCFTNVYADS…	mRNA#71590_1_copies:polyA_is_-1 coordinates are BetaCoV/England/02/2020; mRNA#58235_1_copies:polyA_is_-1 coordinates are BetaCoV/England/02/2020; mRNA#47136_1_copies:polyA_is_-1 coordinates are BetaCoV/England/02/2020; mRNA#69503_1_copies:polyA_is_-1 coordinates are BetaCoV/England/02/2020; mRNA#55318_1_copies:polyA_is_-1 coordinates are BetaCoV/England/02/2020; mRNA#7535_2_copies:polyA_is_-1 coo…
polyA_is_-1_del_spike_S1	4	418	444	IADYNYKLPDDFTGCVIAWNSNNLDSK	MFVFLVLLPLVSSQCVNLTTRTQLPPAYTNSFTRGVYYPDKVFRSSVLHSTQDLFLPFFSNVTWFHAIHVSGTNGTKRFDNPVLPFNDGVYFASTEKSNIIRGWIFGTTLDSKTQSLLIVNNATNVVIKVCEFQFCNDPFLGVYYHKNNKSWMESEFRVYSSANNCTFEYVSQPFLMDLEGKQGNFKNLREFVFKNIDGYFKIYSKHTPINLVRDLPQGFSALEPLVDLPIGINITRFQTLLALHRSYLTPGDSSSGWTAGAAAYYVGYLQPRTFLLKYNENGTITDAVDCALDPLSETKCTLKSFTVEKGIYQTSNFRVQPTESIVRFPNITNLCPFGEVFNATRFASVYAWNRKRISNCVADYSVLYNSASFSTFKCYGVSPTKLNDLCFTNVYADS…	mRNA#71590_1_copies:polyA_is_-1 coordinates are BetaCoV/England/02/2020; mRNA#58235_1_copies:polyA_is_-1 coordinates are BetaCoV/England/02/2020; mRNA#47136_1_copies:polyA_is_-1 coordinates are BetaCoV/England/02/2020; mRNA#69503_1_copies:polyA_is_-1 coordinates are BetaCoV/England/02/2020; mRNA#55318_1_copies:polyA_is_-1 coordinates are BetaCoV/England/02/2020; mRNA#7535_2_copies:polyA_is_-1 coo…
polyA_is_-1_del_spike_S1	40	425	444	LPDDFTGCVIAWNSNNLDSK	MFVFLVLLPLVSSQCVNLTTRTQLPPAYTNSFTRGVYYPDKVFRSSVLHSTQDLFLPFFSNVTWFHAIHVSGTNGTKRFDNPVLPFNDGVYFASTEKSNIIRGWIFGTTLDSKTQSLLIVNNATNVVIKVCEFQFCNDPFLGVYYHKNNKSWMESEFRVYSSANNCTFEYVSQPFLMDLEGKQGNFKNLREFVFKNIDGYFKIYSKHTPINLVRDLPQGFSALEPLVDLPIGINITRFQTLLALHRSYLTPGDSSSGWTAGAAAYYVGYLQPRTFLLKYNENGTITDAVDCALDPLSETKCTLKSFTVEKGIYQTSNFRVQPTESIVRFPNITNLCPFGEVFNATRFASVYAWNRKRISNCVADYSVLYNSASFSTFKCYGVSPTKLNDLCFTNVYADS…	mRNA#71590_1_copies:polyA_is_-1 coordinates are BetaCoV/England/02/2020; mRNA#58235_1_copies:polyA_is_-1 coordinates are BetaCoV/England/02/2020; mRNA#47136_1_copies:polyA_is_-1 coordinates are BetaCoV/England/02/2020; mRNA#69503_1_copies:polyA_is_-1 coordinates are BetaCoV/England/02/2020; mRNA#55318_1_copies:polyA_is_-1 coordinates are BetaCoV/England/02/2020; mRNA#7535_2_copies:polyA_is_-1 coo…
polyA_is_-1_del_spike_S1	56	445	454	VGGNYNYLYR	MFVFLVLLPLVSSQCVNLTTRTQLPPAYTNSFTRGVYYPDKVFRSSVLHSTQDLFLPFFSNVTWFHAIHVSGTNGTKRFDNPVLPFNDGVYFASTEKSNIIRGWIFGTTLDSKTQSLLIVNNATNVVIKVCEFQFCNDPFLGVYYHKNNKSWMESEFRVYSSANNCTFEYVSQPFLMDLEGKQGNFKNLREFVFKNIDGYFKIYSKHTPINLVRDLPQGFSALEPLVDLPIGINITRFQTLLALHRSYLTPGDSSSGWTAGAAAYYVGYLQPRTFLLKYNENGTITDAVDCALDPLSETKCTLKSFTVEKGIYQTSNFRVQPTESIVRFPNITNLCPFGEVFNATRFASVYAWNRKRISNCVADYSVLYNSASFSTFKCYGVSPTKLNDLCFTNVYADS…	mRNA#71590_1_copies:polyA_is_-1 coordinates are BetaCoV/England/02/2020; mRNA#58235_1_copies:polyA_is_-1 coordinates are BetaCoV/England/02/2020; mRNA#47136_1_copies:polyA_is_-1 coordinates are BetaCoV/England/02/2020; mRNA#69503_1_copies:polyA_is_-1 coordinates are BetaCoV/England/02/2020; mRNA#55318_1_copies:polyA_is_-1 coordinates are BetaCoV/England/02/2020; mRNA#7535_2_copies:polyA_is_-1 coo…
polyA_is_-1_del_spike_S1	3	458	466	KSNLKPFER	MFVFLVLLPLVSSQCVNLTTRTQLPPAYTNSFTRGVYYPDKVFRSSVLHSTQDLFLPFFSNVTWFHAIHVSGTNGTKRFDNPVLPFNDGVYFASTEKSNIIRGWIFGTTLDSKTQSLLIVNNATNVVIKVCEFQFCNDPFLGVYYHKNNKSWMESEFRVYSSANNCTFEYVSQPFLMDLEGKQGNFKNLREFVFKNIDGYFKIYSKHTPINLVRDLPQGFSALEPLVDLPIGINITRFQTLLALHRSYLTPGDSSSGWTAGAAAYYVGYLQPRTFLLKYNENGTITDAVDCALDPLSETKCTLKSFTVEKGIYQTSNFRVQPTESIVRFPNITNLCPFGEVFNATRFASVYAWNRKRISNCVADYSVLYNSASFSTFKCYGVSPTKLNDLCFTNVYADS…	mRNA#71590_1_copies:polyA_is_-1 coordinates are BetaCoV/England/02/2020; mRNA#58235_1_copies:polyA_is_-1 coordinates are BetaCoV/England/02/2020; mRNA#47136_1_copies:polyA_is_-1 coordinates are BetaCoV/England/02/2020; mRNA#69503_1_copies:polyA_is_-1 coordinates are BetaCoV/England/02/2020; mRNA#55318_1_copies:polyA_is_-1 coordinates are BetaCoV/England/02/2020; mRNA#7535_2_copies:polyA_is_-1 coo…
polyA_is_-1_del_spike_S1	11	459	466	SNLKPFER	MFVFLVLLPLVSSQCVNLTTRTQLPPAYTNSFTRGVYYPDKVFRSSVLHSTQDLFLPFFSNVTWFHAIHVSGTNGTKRFDNPVLPFNDGVYFASTEKSNIIRGWIFGTTLDSKTQSLLIVNNATNVVIKVCEFQFCNDPFLGVYYHKNNKSWMESEFRVYSSANNCTFEYVSQPFLMDLEGKQGNFKNLREFVFKNIDGYFKIYSKHTPINLVRDLPQGFSALEPLVDLPIGINITRFQTLLALHRSYLTPGDSSSGWTAGAAAYYVGYLQPRTFLLKYNENGTITDAVDCALDPLSETKCTLKSFTVEKGIYQTSNFRVQPTESIVRFPNITNLCPFGEVFNATRFASVYAWNRKRISNCVADYSVLYNSASFSTFKCYGVSPTKLNDLCFTNVYADS…	mRNA#71590_1_copies:polyA_is_-1 coordinates are BetaCoV/England/02/2020; mRNA#58235_1_copies:polyA_is_-1 coordinates are BetaCoV/England/02/2020; mRNA#47136_1_copies:polyA_is_-1 coordinates are BetaCoV/England/02/2020; mRNA#69503_1_copies:polyA_is_-1 coordinates are BetaCoV/England/02/2020; mRNA#55318_1_copies:polyA_is_-1 coordinates are BetaCoV/England/02/2020; mRNA#7535_2_copies:polyA_is_-1 coo…
polyA_is_-1_del_spike_S1	17	510	528	VVVLSFELLHAPATVCGPK	MFVFLVLLPLVSSQCVNLTTRTQLPPAYTNSFTRGVYYPDKVFRSSVLHSTQDLFLPFFSNVTWFHAIHVSGTNGTKRFDNPVLPFNDGVYFASTEKSNIIRGWIFGTTLDSKTQSLLIVNNATNVVIKVCEFQFCNDPFLGVYYHKNNKSWMESEFRVYSSANNCTFEYVSQPFLMDLEGKQGNFKNLREFVFKNIDGYFKIYSKHTPINLVRDLPQGFSALEPLVDLPIGINITRFQTLLALHRSYLTPGDSSSGWTAGAAAYYVGYLQPRTFLLKYNENGTITDAVDCALDPLSETKCTLKSFTVEKGIYQTSNFRVQPTESIVRFPNITNLCPFGEVFNATRFASVYAWNRKRISNCVADYSVLYNSASFSTFKCYGVSPTKLNDLCFTNVYADS…	mRNA#71590_1_copies:polyA_is_-1 coordinates are BetaCoV/England/02/2020; mRNA#58235_1_copies:polyA_is_-1 coordinates are BetaCoV/England/02/2020; mRNA#47136_1_copies:polyA_is_-1 coordinates are BetaCoV/England/02/2020; mRNA#69503_1_copies:polyA_is_-1 coordinates are BetaCoV/England/02/2020; mRNA#55318_1_copies:polyA_is_-1 coordinates are BetaCoV/England/02/2020; mRNA#7535_2_copies:polyA_is_-1 coo…
polyA_is_-1_del_spike_S1	13	538	557	CVNFNFNGLTGTGVLTESNK	MFVFLVLLPLVSSQCVNLTTRTQLPPAYTNSFTRGVYYPDKVFRSSVLHSTQDLFLPFFSNVTWFHAIHVSGTNGTKRFDNPVLPFNDGVYFASTEKSNIIRGWIFGTTLDSKTQSLLIVNNATNVVIKVCEFQFCNDPFLGVYYHKNNKSWMESEFRVYSSANNCTFEYVSQPFLMDLEGKQGNFKNLREFVFKNIDGYFKIYSKHTPINLVRDLPQGFSALEPLVDLPIGINITRFQTLLALHRSYLTPGDSSSGWTAGAAAYYVGYLQPRTFLLKYNENGTITDAVDCALDPLSETKCTLKSFTVEKGIYQTSNFRVQPTESIVRFPNITNLCPFGEVFNATRFASVYAWNRKRISNCVADYSVLYNSASFSTFKCYGVSPTKLNDLCFTNVYADS…	mRNA#58235_1_copies:polyA_is_-1 coordinates are BetaCoV/England/02/2020; mRNA#47136_1_copies:polyA_is_-1 coordinates are BetaCoV/England/02/2020; mRNA#69503_1_copies:polyA_is_-1 coordinates are BetaCoV/England/02/2020; mRNA#55318_1_copies:polyA_is_-1 coordinates are BetaCoV/England/02/2020; mRNA#7535_2_copies:polyA_is_-1 coordinates are BetaCoV/England/02/2020; mRNA#33202_1_copies:polyA_is_-1 coo…
polyA_is_-1_del_spike_S1	24	538	558	CVNFNFNGLTGTGVLTESNKK	MFVFLVLLPLVSSQCVNLTTRTQLPPAYTNSFTRGVYYPDKVFRSSVLHSTQDLFLPFFSNVTWFHAIHVSGTNGTKRFDNPVLPFNDGVYFASTEKSNIIRGWIFGTTLDSKTQSLLIVNNATNVVIKVCEFQFCNDPFLGVYYHKNNKSWMESEFRVYSSANNCTFEYVSQPFLMDLEGKQGNFKNLREFVFKNIDGYFKIYSKHTPINLVRDLPQGFSALEPLVDLPIGINITRFQTLLALHRSYLTPGDSSSGWTAGAAAYYVGYLQPRTFLLKYNENGTITDAVDCALDPLSETKCTLKSFTVEKGIYQTSNFRVQPTESIVRFPNITNLCPFGEVFNATRFASVYAWNRKRISNCVADYSVLYNSASFSTFKCYGVSPTKLNDLCFTNVYADS…	mRNA#58235_1_copies:polyA_is_-1 coordinates are BetaCoV/England/02/2020; mRNA#47136_1_copies:polyA_is_-1 coordinates are BetaCoV/England/02/2020; mRNA#69503_1_copies:polyA_is_-1 coordinates are BetaCoV/England/02/2020; mRNA#55318_1_copies:polyA_is_-1 coordinates are BetaCoV/England/02/2020; mRNA#7535_2_copies:polyA_is_-1 coordinates are BetaCoV/England/02/2020; mRNA#33202_1_copies:polyA_is_-1 coo…
polyA_is_-1_del_spike_S1	2	558	567	KFLPFQQFGR	MFVFLVLLPLVSSQCVNLTTRTQLPPAYTNSFTRGVYYPDKVFRSSVLHSTQDLFLPFFSNVTWFHAIHVSGTNGTKRFDNPVLPFNDGVYFASTEKSNIIRGWIFGTTLDSKTQSLLIVNNATNVVIKVCEFQFCNDPFLGVYYHKNNKSWMESEFRVYSSANNCTFEYVSQPFLMDLEGKQGNFKNLREFVFKNIDGYFKIYSKHTPINLVRDLPQGFSALEPLVDLPIGINITRFQTLLALHRSYLTPGDSSSGWTAGAAAYYVGYLQPRTFLLKYNENGTITDAVDCALDPLSETKCTLKSFTVEKGIYQTSNFRVQPTESIVRFPNITNLCPFGEVFNATRFASVYAWNRKRISNCVADYSVLYNSASFSTFKCYGVSPTKLNDLCFTNVYADS…	mRNA#58235_1_copies:polyA_is_-1 coordinates are BetaCoV/England/02/2020; mRNA#47136_1_copies:polyA_is_-1 coordinates are BetaCoV/England/02/2020; mRNA#69503_1_copies:polyA_is_-1 coordinates are BetaCoV/England/02/2020; mRNA#55318_1_copies:polyA_is_-1 coordinates are BetaCoV/England/02/2020; mRNA#7535_2_copies:polyA_is_-1 coordinates are BetaCoV/England/02/2020; mRNA#33202_1_copies:polyA_is_-1 coo…
polyA_is_-1_del_spike_S1	118	559	567	FLPFQQFGR	MFVFLVLLPLVSSQCVNLTTRTQLPPAYTNSFTRGVYYPDKVFRSSVLHSTQDLFLPFFSNVTWFHAIHVSGTNGTKRFDNPVLPFNDGVYFASTEKSNIIRGWIFGTTLDSKTQSLLIVNNATNVVIKVCEFQFCNDPFLGVYYHKNNKSWMESEFRVYSSANNCTFEYVSQPFLMDLEGKQGNFKNLREFVFKNIDGYFKIYSKHTPINLVRDLPQGFSALEPLVDLPIGINITRFQTLLALHRSYLTPGDSSSGWTAGAAAYYVGYLQPRTFLLKYNENGTITDAVDCALDPLSETKCTLKSFTVEKGIYQTSNFRVQPTESIVRFPNITNLCPFGEVFNATRFASVYAWNRKRISNCVADYSVLYNSASFSTFKCYGVSPTKLNDLCFTNVYADS…	mRNA#58235_1_copies:polyA_is_-1 coordinates are BetaCoV/England/02/2020; mRNA#47136_1_copies:polyA_is_-1 coordinates are BetaCoV/England/02/2020; mRNA#69503_1_copies:polyA_is_-1 coordinates are BetaCoV/England/02/2020; mRNA#55318_1_copies:polyA_is_-1 coordinates are BetaCoV/England/02/2020; mRNA#7535_2_copies:polyA_is_-1 coordinates are BetaCoV/England/02/2020; mRNA#33202_1_copies:polyA_is_-1 coo…
polyA_is_-1_del_spike_S1	17	568	577	DIADTTDAVR	MFVFLVLLPLVSSQCVNLTTRTQLPPAYTNSFTRGVYYPDKVFRSSVLHSTQDLFLPFFSNVTWFHAIHVSGTNGTKRFDNPVLPFNDGVYFASTEKSNIIRGWIFGTTLDSKTQSLLIVNNATNVVIKVCEFQFCNDPFLGVYYHKNNKSWMESEFRVYSSANNCTFEYVSQPFLMDLEGKQGNFKNLREFVFKNIDGYFKIYSKHTPINLVRDLPQGFSALEPLVDLPIGINITRFQTLLALHRSYLTPGDSSSGWTAGAAAYYVGYLQPRTFLLKYNENGTITDAVDCALDPLSETKCTLKSFTVEKGIYQTSNFRVQPTESIVRFPNITNLCPFGEVFNATRFASVYAWNRKRISNCVADYSVLYNSASFSTFKCYGVSPTKLNDLCFTNVYADS…	mRNA#58235_1_copies:polyA_is_-1 coordinates are BetaCoV/England/02/2020; mRNA#47136_1_copies:polyA_is_-1 coordinates are BetaCoV/England/02/2020; mRNA#69503_1_copies:polyA_is_-1 coordinates are BetaCoV/England/02/2020; mRNA#55318_1_copies:polyA_is_-1 coordinates are BetaCoV/England/02/2020; mRNA#7535_2_copies:polyA_is_-1 coordinates are BetaCoV/England/02/2020; mRNA#33202_1_copies:polyA_is_-1 coo…
polyA_is_-1_del_spike_S1	47	635	646	VYSTGSNVFQTR	MFVFLVLLPLVSSQCVNLTTRTQLPPAYTNSFTRGVYYPDKVFRSSVLHSTQDLFLPFFSNVTWFHAIHVSGTNGTKRFDNPVLPFNDGVYFASTEKSNIIRGWIFGTTLDSKTQSLLIVNNATNVVIKVCEFQFCNDPFLGVYYHKNNKSWMESEFRVYSSANNCTFEYVSQPFLMDLEGKQGNFKNLREFVFKNIDGYFKIYSKHTPINLVRDLPQGFSALEPLVDLPIGINITRFQTLLALHRSYLTPGDSSSGWTAGAAAYYVGYLQPRTFLLKYNENGTITDAVDCALDPLSETKCTLKSFTVEKGIYQTSNFRVQPTESIVRFPNITNLCPFGEVFNATRFASVYAWNRKRISNCVADYSVLYNSASFSTFKCYGVSPTKLNDLCFTNVYADS…	mRNA#69503_1_copies:polyA_is_-1 coordinates are BetaCoV/England/02/2020; mRNA#55318_1_copies:polyA_is_-1 coordinates are BetaCoV/England/02/2020; mRNA#7535_2_copies:polyA_is_-1 coordinates are BetaCoV/England/02/2020; mRNA#33202_1_copies:polyA_is_-1 coordinates are BetaCoV/England/02/2020; mRNA#45295_1_copies:polyA_is_-1 coordinates are BetaCoV/England/02/2020; mRNA#29484_1_copies:polyA_is_-1 coo…
SARS2_M	4	1	14	MADSNGTITVEELK	MADSNGTITVEELKKLLEQWNLVIGFLFLTWICLLQFAYANRNRFLYIIKLIFLWLLWPVTLACFVLAAVYRINWITGGIAIAMACLVGLMWLSYFIASFRLFARTRSMWSFNPETNILLNVPLHGTILTRPLLESELVIGAVILRGHLRIAGHHLGRCDIKDLPKEITVATSRTLSYYKLGASQRVAGDSGFAAYSRYRIGNYKLNTDHSSSSDNIALLVQ	mRNA#11916_1_copies:polyA_is_-1 coordinates are BetaCoV/England/02/2020; mRNA#3062_4_copies:polyA_is_-1 coordinates are BetaCoV/England/02/2020; mRNA#11617_1_copies:polyA_is_-1 coordinates are BetaCoV/England/02/2020; mRNA#5005_3_copies:polyA_is_-1 coordinates are BetaCoV/England/02/2020; mRNA#10741_2_copies:polyA_is_-1 coordinates are BetaCoV/England/02/2020; mRNA#15878_1_copies:polyA_is_-1 coor…
SARS2_M	30	1	15	MADSNGTITVEELKK	MADSNGTITVEELKKLLEQWNLVIGFLFLTWICLLQFAYANRNRFLYIIKLIFLWLLWPVTLACFVLAAVYRINWITGGIAIAMACLVGLMWLSYFIASFRLFARTRSMWSFNPETNILLNVPLHGTILTRPLLESELVIGAVILRGHLRIAGHHLGRCDIKDLPKEITVATSRTLSYYKLGASQRVAGDSGFAAYSRYRIGNYKLNTDHSSSSDNIALLVQ	mRNA#11916_1_copies:polyA_is_-1 coordinates are BetaCoV/England/02/2020; mRNA#3062_4_copies:polyA_is_-1 coordinates are BetaCoV/England/02/2020; mRNA#11617_1_copies:polyA_is_-1 coordinates are BetaCoV/England/02/2020; mRNA#5005_3_copies:polyA_is_-1 coordinates are BetaCoV/England/02/2020; mRNA#10741_2_copies:polyA_is_-1 coordinates are BetaCoV/England/02/2020; mRNA#15878_1_copies:polyA_is_-1 coor…
SARS2_M	4	45	50	FLYIIK	MADSNGTITVEELKKLLEQWNLVIGFLFLTWICLLQFAYANRNRFLYIIKLIFLWLLWPVTLACFVLAAVYRINWITGGIAIAMACLVGLMWLSYFIASFRLFARTRSMWSFNPETNILLNVPLHGTILTRPLLESELVIGAVILRGHLRIAGHHLGRCDIKDLPKEITVATSRTLSYYKLGASQRVAGDSGFAAYSRYRIGNYKLNTDHSSSSDNIALLVQ	mRNA#11916_1_copies:polyA_is_-1 coordinates are BetaCoV/England/02/2020; mRNA#3062_4_copies:polyA_is_-1 coordinates are BetaCoV/England/02/2020; mRNA#5005_3_copies:polyA_is_-1 coordinates are BetaCoV/England/02/2020; mRNA#16843_1_copies:polyA_is_-1 coordinates are BetaCoV/England/02/2020; mRNA#15878_1_copies:polyA_is_-1 coordinates are BetaCoV/England/02/2020; mRNA#16464_1_copies:polyA_is_-1 coor…
SARS2_M	26	159	166	CDIKDLPK	MADSNGTITVEELKKLLEQWNLVIGFLFLTWICLLQFAYANRNRFLYIIKLIFLWLLWPVTLACFVLAAVYRINWITGGIAIAMACLVGLMWLSYFIASFRLFARTRSMWSFNPETNILLNVPLHGTILTRPLLESELVIGAVILRGHLRIAGHHLGRCDIKDLPKEITVATSRTLSYYKLGASQRVAGDSGFAAYSRYRIGNYKLNTDHSSSSDNIALLVQ	mRNA#11916_1_copies:polyA_is_-1 coordinates are BetaCoV/England/02/2020; mRNA#16843_1_copies:polyA_is_-1 coordinates are BetaCoV/England/02/2020; mRNA#20400_1_copies:polyA_is_-1 coordinates are BetaCoV/England/02/2020; mRNA#10695_2_copies:polyA_is_-1 coordinates are BetaCoV/England/02/2020; mRNA#16464_1_copies:polyA_is_-1 coordinates are BetaCoV/England/02/2020; mRNA#15294_1_copies:polyA_is_-1 co…
SARS2_M	6	159	174	CDIKDLPKEITVATSR	MADSNGTITVEELKKLLEQWNLVIGFLFLTWICLLQFAYANRNRFLYIIKLIFLWLLWPVTLACFVLAAVYRINWITGGIAIAMACLVGLMWLSYFIASFRLFARTRSMWSFNPETNILLNVPLHGTILTRPLLESELVIGAVILRGHLRIAGHHLGRCDIKDLPKEITVATSRTLSYYKLGASQRVAGDSGFAAYSRYRIGNYKLNTDHSSSSDNIALLVQ	mRNA#11916_1_copies:polyA_is_-1 coordinates are BetaCoV/England/02/2020; mRNA#16843_1_copies:polyA_is_-1 coordinates are BetaCoV/England/02/2020; mRNA#32297_1_copies:polyA_is_-1 coordinates are BetaCoV/England/02/2020; mRNA#20400_1_copies:polyA_is_-1 coordinates are BetaCoV/England/02/2020; mRNA#32416_1_copies:polyA_is_-1 coordinates are BetaCoV/England/02/2020; mRNA#10695_2_copies:polyA_is_-1 co…
SARS2_M	10	163	174	DLPKEITVATSR	MADSNGTITVEELKKLLEQWNLVIGFLFLTWICLLQFAYANRNRFLYIIKLIFLWLLWPVTLACFVLAAVYRINWITGGIAIAMACLVGLMWLSYFIASFRLFARTRSMWSFNPETNILLNVPLHGTILTRPLLESELVIGAVILRGHLRIAGHHLGRCDIKDLPKEITVATSRTLSYYKLGASQRVAGDSGFAAYSRYRIGNYKLNTDHSSSSDNIALLVQ	mRNA#11916_1_copies:polyA_is_-1 coordinates are BetaCoV/England/02/2020; mRNA#16843_1_copies:polyA_is_-1 coordinates are BetaCoV/England/02/2020; mRNA#32297_1_copies:polyA_is_-1 coordinates are BetaCoV/England/02/2020; mRNA#20400_1_copies:polyA_is_-1 coordinates are BetaCoV/England/02/2020; mRNA#32416_1_copies:polyA_is_-1 coordinates are BetaCoV/England/02/2020; mRNA#10695_2_copies:polyA_is_-1 co…
SARS2_M	35	167	174	EITVATSR	MADSNGTITVEELKKLLEQWNLVIGFLFLTWICLLQFAYANRNRFLYIIKLIFLWLLWPVTLACFVLAAVYRINWITGGIAIAMACLVGLMWLSYFIASFRLFARTRSMWSFNPETNILLNVPLHGTILTRPLLESELVIGAVILRGHLRIAGHHLGRCDIKDLPKEITVATSRTLSYYKLGASQRVAGDSGFAAYSRYRIGNYKLNTDHSSSSDNIALLVQ	mRNA#11916_1_copies:polyA_is_-1 coordinates are BetaCoV/England/02/2020; mRNA#16843_1_copies:polyA_is_-1 coordinates are BetaCoV/England/02/2020; mRNA#32297_1_copies:polyA_is_-1 coordinates are BetaCoV/England/02/2020; mRNA#20400_1_copies:polyA_is_-1 coordinates are BetaCoV/England/02/2020; mRNA#32416_1_copies:polyA_is_-1 coordinates are BetaCoV/England/02/2020; mRNA#10695_2_copies:polyA_is_-1 co…
SARS2_M	4	167	186	EITVATSRTLSYYKLGASQR	MADSNGTITVEELKKLLEQWNLVIGFLFLTWICLLQFAYANRNRFLYIIKLIFLWLLWPVTLACFVLAAVYRINWITGGIAIAMACLVGLMWLSYFIASFRLFARTRSMWSFNPETNILLNVPLHGTILTRPLLESELVIGAVILRGHLRIAGHHLGRCDIKDLPKEITVATSRTLSYYKLGASQRVAGDSGFAAYSRYRIGNYKLNTDHSSSSDNIALLVQ	mRNA#11916_1_copies:polyA_is_-1 coordinates are BetaCoV/England/02/2020; mRNA#16843_1_copies:polyA_is_-1 coordinates are BetaCoV/England/02/2020; mRNA#32297_1_copies:polyA_is_-1 coordinates are BetaCoV/England/02/2020; mRNA#36436_1_copies:polyA_is_-1 coordinates are BetaCoV/England/02/2020; mRNA#20400_1_copies:polyA_is_-1 coordinates are BetaCoV/England/02/2020; mRNA#32416_1_copies:polyA_is_-1 co…
SARS2_M	8	175	180	TLSYYK	MADSNGTITVEELKKLLEQWNLVIGFLFLTWICLLQFAYANRNRFLYIIKLIFLWLLWPVTLACFVLAAVYRINWITGGIAIAMACLVGLMWLSYFIASFRLFARTRSMWSFNPETNILLNVPLHGTILTRPLLESELVIGAVILRGHLRIAGHHLGRCDIKDLPKEITVATSRTLSYYKLGASQRVAGDSGFAAYSRYRIGNYKLNTDHSSSSDNIALLVQ	mRNA#11916_1_copies:polyA_is_-1 coordinates are BetaCoV/England/02/2020; mRNA#16843_1_copies:polyA_is_-1 coordinates are BetaCoV/England/02/2020; mRNA#32297_1_copies:polyA_is_-1 coordinates are BetaCoV/England/02/2020; mRNA#36436_1_copies:polyA_is_-1 coordinates are BetaCoV/England/02/2020; mRNA#20400_1_copies:polyA_is_-1 coordinates are BetaCoV/England/02/2020; mRNA#32416_1_copies:polyA_is_-1 co…
SARS2_M	6	175	186	TLSYYKLGASQR	MADSNGTITVEELKKLLEQWNLVIGFLFLTWICLLQFAYANRNRFLYIIKLIFLWLLWPVTLACFVLAAVYRINWITGGIAIAMACLVGLMWLSYFIASFRLFARTRSMWSFNPETNILLNVPLHGTILTRPLLESELVIGAVILRGHLRIAGHHLGRCDIKDLPKEITVATSRTLSYYKLGASQRVAGDSGFAAYSRYRIGNYKLNTDHSSSSDNIALLVQ	mRNA#11916_1_copies:polyA_is_-1 coordinates are BetaCoV/England/02/2020; mRNA#16843_1_copies:polyA_is_-1 coordinates are BetaCoV/England/02/2020; mRNA#32297_1_copies:polyA_is_-1 coordinates are BetaCoV/England/02/2020; mRNA#36436_1_copies:polyA_is_-1 coordinates are BetaCoV/England/02/2020; mRNA#20400_1_copies:polyA_is_-1 coordinates are BetaCoV/England/02/2020; mRNA#32416_1_copies:polyA_is_-1 co…
SARS2_M	2	175	198	TLSYYKLGASQRVAGDSGFAAYSR	MADSNGTITVEELKKLLEQWNLVIGFLFLTWICLLQFAYANRNRFLYIIKLIFLWLLWPVTLACFVLAAVYRINWITGGIAIAMACLVGLMWLSYFIASFRLFARTRSMWSFNPETNILLNVPLHGTILTRPLLESELVIGAVILRGHLRIAGHHLGRCDIKDLPKEITVATSRTLSYYKLGASQRVAGDSGFAAYSRYRIGNYKLNTDHSSSSDNIALLVQ	mRNA#11916_1_copies:polyA_is_-1 coordinates are BetaCoV/England/02/2020; mRNA#16843_1_copies:polyA_is_-1 coordinates are BetaCoV/England/02/2020; mRNA#32297_1_copies:polyA_is_-1 coordinates are BetaCoV/England/02/2020; mRNA#36436_1_copies:polyA_is_-1 coordinates are BetaCoV/England/02/2020; mRNA#20400_1_copies:polyA_is_-1 coordinates are BetaCoV/England/02/2020; mRNA#32416_1_copies:polyA_is_-1 co…
SARS2_M	103	187	198	VAGDSGFAAYSR	MADSNGTITVEELKKLLEQWNLVIGFLFLTWICLLQFAYANRNRFLYIIKLIFLWLLWPVTLACFVLAAVYRINWITGGIAIAMACLVGLMWLSYFIASFRLFARTRSMWSFNPETNILLNVPLHGTILTRPLLESELVIGAVILRGHLRIAGHHLGRCDIKDLPKEITVATSRTLSYYKLGASQRVAGDSGFAAYSRYRIGNYKLNTDHSSSSDNIALLVQ	mRNA#11916_1_copies:polyA_is_-1 coordinates are BetaCoV/England/02/2020; mRNA#16843_1_copies:polyA_is_-1 coordinates are BetaCoV/England/02/2020; mRNA#32297_1_copies:polyA_is_-1 coordinates are BetaCoV/England/02/2020; mRNA#36436_1_copies:polyA_is_-1 coordinates are BetaCoV/England/02/2020; mRNA#20400_1_copies:polyA_is_-1 coordinates are BetaCoV/England/02/2020; mRNA#32416_1_copies:polyA_is_-1 co…
SARS2_M	2	187	200	VAGDSGFAAYSRYR	MADSNGTITVEELKKLLEQWNLVIGFLFLTWICLLQFAYANRNRFLYIIKLIFLWLLWPVTLACFVLAAVYRINWITGGIAIAMACLVGLMWLSYFIASFRLFARTRSMWSFNPETNILLNVPLHGTILTRPLLESELVIGAVILRGHLRIAGHHLGRCDIKDLPKEITVATSRTLSYYKLGASQRVAGDSGFAAYSRYRIGNYKLNTDHSSSSDNIALLVQ	mRNA#11916_1_copies:polyA_is_-1 coordinates are BetaCoV/England/02/2020; mRNA#16843_1_copies:polyA_is_-1 coordinates are BetaCoV/England/02/2020; mRNA#32297_1_copies:polyA_is_-1 coordinates are BetaCoV/England/02/2020; mRNA#36436_1_copies:polyA_is_-1 coordinates are BetaCoV/England/02/2020; mRNA#20400_1_copies:polyA_is_-1 coordinates are BetaCoV/England/02/2020; mRNA#10695_2_copies:polyA_is_-1 co…
SARS2_M	2	199	222	YRIGNYKLNTDHSSSSDNIALLVQ	MADSNGTITVEELKKLLEQWNLVIGFLFLTWICLLQFAYANRNRFLYIIKLIFLWLLWPVTLACFVLAAVYRINWITGGIAIAMACLVGLMWLSYFIASFRLFARTRSMWSFNPETNILLNVPLHGTILTRPLLESELVIGAVILRGHLRIAGHHLGRCDIKDLPKEITVATSRTLSYYKLGASQRVAGDSGFAAYSRYRIGNYKLNTDHSSSSDNIALLVQ	mRNA#11916_1_copies:polyA_is_-1 coordinates are BetaCoV/England/02/2020; mRNA#53621_1_copies:polyA_is_-1 coordinates are BetaCoV/England/02/2020; mRNA#32297_1_copies:polyA_is_-1 coordinates are BetaCoV/England/02/2020; mRNA#24795_1_copies:polyA_is_-1 coordinates are BetaCoV/England/02/2020; mRNA#36436_1_copies:polyA_is_-1 coordinates are BetaCoV/England/02/2020; mRNA#20400_1_copies:polyA_is_-1 co…
SARS2_M	2	201	222	IGNYKLNTDHSSSSDNIALLVQ	MADSNGTITVEELKKLLEQWNLVIGFLFLTWICLLQFAYANRNRFLYIIKLIFLWLLWPVTLACFVLAAVYRINWITGGIAIAMACLVGLMWLSYFIASFRLFARTRSMWSFNPETNILLNVPLHGTILTRPLLESELVIGAVILRGHLRIAGHHLGRCDIKDLPKEITVATSRTLSYYKLGASQRVAGDSGFAAYSRYRIGNYKLNTDHSSSSDNIALLVQ	mRNA#11916_1_copies:polyA_is_-1 coordinates are BetaCoV/England/02/2020; mRNA#53621_1_copies:polyA_is_-1 coordinates are BetaCoV/England/02/2020; mRNA#32297_1_copies:polyA_is_-1 coordinates are BetaCoV/England/02/2020; mRNA#24795_1_copies:polyA_is_-1 coordinates are BetaCoV/England/02/2020; mRNA#36436_1_copies:polyA_is_-1 coordinates are BetaCoV/England/02/2020; mRNA#20400_1_copies:polyA_is_-1 co…
SARS2_M	21	206	222	LNTDHSSSSDNIALLVQ	MADSNGTITVEELKKLLEQWNLVIGFLFLTWICLLQFAYANRNRFLYIIKLIFLWLLWPVTLACFVLAAVYRINWITGGIAIAMACLVGLMWLSYFIASFRLFARTRSMWSFNPETNILLNVPLHGTILTRPLLESELVIGAVILRGHLRIAGHHLGRCDIKDLPKEITVATSRTLSYYKLGASQRVAGDSGFAAYSRYRIGNYKLNTDHSSSSDNIALLVQ	mRNA#11916_1_copies:polyA_is_-1 coordinates are BetaCoV/England/02/2020; mRNA#53621_1_copies:polyA_is_-1 coordinates are BetaCoV/England/02/2020; mRNA#32297_1_copies:polyA_is_-1 coordinates are BetaCoV/England/02/2020; mRNA#24795_1_copies:polyA_is_-1 coordinates are BetaCoV/England/02/2020; mRNA#36436_1_copies:polyA_is_-1 coordinates are BetaCoV/England/02/2020; mRNA#20400_1_copies:polyA_is_-1 co…
SARS2_N	14	1	10	MSDNGPQNQR	MSDNGPQNQRNAPRITFGGPSDSTGSNQNGERSGARSKQRRPQGLPNNTASWFTALTQHGKEDLKFPRGQGVPINTNSSPDDQIGYYRRATRRIRGGDGKMKDLSPRWYFYYLGTGPEAGLPYGANKDGIIWVATEGALNTPKDHIGTRNPANNAAIVLQLPQGTTLPKGFYAEGSRGGSQASSRSSSRSRNSSRNSTPGSSRGTSPARMAGNGGDAALALLLLDRLNQLESKMSGKGQQQQGQTVTKKSAAEASKKPRQKRTATKAYNVTQAFGRRGPEQTQGNFGDQELIRQGTDYKHWPQIAQFAPSASAFFGMSRIGMEVTPSGTWLTYTGAIKLDDKDPNFKDQVILLNKHIDAYKTFPPTEPKKDKKKKADETQALPQRQKKQQTVTLLPAAD…	mRNA#884_13_copies:polyA_is_-1 coordinates are BetaCoV/England/02/2020; mRNA#1349_9_copies:polyA_is_-1 coordinates are BetaCoV/England/02/2020; mRNA#2164_6_copies:polyA_is_-1 coordinates are BetaCoV/England/02/2020; mRNA#470_26_copies:polyA_is_-1 coordinates are BetaCoV/England/02/2020; mRNA#1553_8_copies:polyA_is_-1 coordinates are BetaCoV/England/02/2020; mRNA#207_69_copies:polyA_is_-1 coordina…
SARS2_N	1	1	14	MSDNGPQNQRNAPR	MSDNGPQNQRNAPRITFGGPSDSTGSNQNGERSGARSKQRRPQGLPNNTASWFTALTQHGKEDLKFPRGQGVPINTNSSPDDQIGYYRRATRRIRGGDGKMKDLSPRWYFYYLGTGPEAGLPYGANKDGIIWVATEGALNTPKDHIGTRNPANNAAIVLQLPQGTTLPKGFYAEGSRGGSQASSRSSSRSRNSSRNSTPGSSRGTSPARMAGNGGDAALALLLLDRLNQLESKMSGKGQQQQGQTVTKKSAAEASKKPRQKRTATKAYNVTQAFGRRGPEQTQGNFGDQELIRQGTDYKHWPQIAQFAPSASAFFGMSRIGMEVTPSGTWLTYTGAIKLDDKDPNFKDQVILLNKHIDAYKTFPPTEPKKDKKKKADETQALPQRQKKQQTVTLLPAAD…	mRNA#884_13_copies:polyA_is_-1 coordinates are BetaCoV/England/02/2020; mRNA#1349_9_copies:polyA_is_-1 coordinates are BetaCoV/England/02/2020; mRNA#2164_6_copies:polyA_is_-1 coordinates are BetaCoV/England/02/2020; mRNA#470_26_copies:polyA_is_-1 coordinates are BetaCoV/England/02/2020; mRNA#1553_8_copies:polyA_is_-1 coordinates are BetaCoV/England/02/2020; mRNA#207_69_copies:polyA_is_-1 coordina…
SARS2_N	1	11	32	NAPRITFGGPSDSTGSNQNGER	MSDNGPQNQRNAPRITFGGPSDSTGSNQNGERSGARSKQRRPQGLPNNTASWFTALTQHGKEDLKFPRGQGVPINTNSSPDDQIGYYRRATRRIRGGDGKMKDLSPRWYFYYLGTGPEAGLPYGANKDGIIWVATEGALNTPKDHIGTRNPANNAAIVLQLPQGTTLPKGFYAEGSRGGSQASSRSSSRSRNSSRNSTPGSSRGTSPARMAGNGGDAALALLLLDRLNQLESKMSGKGQQQQGQTVTKKSAAEASKKPRQKRTATKAYNVTQAFGRRGPEQTQGNFGDQELIRQGTDYKHWPQIAQFAPSASAFFGMSRIGMEVTPSGTWLTYTGAIKLDDKDPNFKDQVILLNKHIDAYKTFPPTEPKKDKKKKADETQALPQRQKKQQTVTLLPAAD…	mRNA#884_13_copies:polyA_is_-1 coordinates are BetaCoV/England/02/2020; mRNA#2164_6_copies:polyA_is_-1 coordinates are BetaCoV/England/02/2020; mRNA#470_26_copies:polyA_is_-1 coordinates are BetaCoV/England/02/2020; mRNA#1553_8_copies:polyA_is_-1 coordinates are BetaCoV/England/02/2020; mRNA#207_69_copies:polyA_is_-1 coordinates are BetaCoV/England/02/2020; mRNA#3612_4_copies:polyA_is_-1 coordina…
SARS2_N	121	15	32	ITFGGPSDSTGSNQNGER	MSDNGPQNQRNAPRITFGGPSDSTGSNQNGERSGARSKQRRPQGLPNNTASWFTALTQHGKEDLKFPRGQGVPINTNSSPDDQIGYYRRATRRIRGGDGKMKDLSPRWYFYYLGTGPEAGLPYGANKDGIIWVATEGALNTPKDHIGTRNPANNAAIVLQLPQGTTLPKGFYAEGSRGGSQASSRSSSRSRNSSRNSTPGSSRGTSPARMAGNGGDAALALLLLDRLNQLESKMSGKGQQQQGQTVTKKSAAEASKKPRQKRTATKAYNVTQAFGRRGPEQTQGNFGDQELIRQGTDYKHWPQIAQFAPSASAFFGMSRIGMEVTPSGTWLTYTGAIKLDDKDPNFKDQVILLNKHIDAYKTFPPTEPKKDKKKKADETQALPQRQKKQQTVTLLPAAD…	mRNA#884_13_copies:polyA_is_-1 coordinates are BetaCoV/England/02/2020; mRNA#2164_6_copies:polyA_is_-1 coordinates are BetaCoV/England/02/2020; mRNA#470_26_copies:polyA_is_-1 coordinates are BetaCoV/England/02/2020; mRNA#1553_8_copies:polyA_is_-1 coordinates are BetaCoV/England/02/2020; mRNA#207_69_copies:polyA_is_-1 coordinates are BetaCoV/England/02/2020; mRNA#3612_4_copies:polyA_is_-1 coordina…
SARS2_N	1	15	36	ITFGGPSDSTGSNQNGERSGAR	MSDNGPQNQRNAPRITFGGPSDSTGSNQNGERSGARSKQRRPQGLPNNTASWFTALTQHGKEDLKFPRGQGVPINTNSSPDDQIGYYRRATRRIRGGDGKMKDLSPRWYFYYLGTGPEAGLPYGANKDGIIWVATEGALNTPKDHIGTRNPANNAAIVLQLPQGTTLPKGFYAEGSRGGSQASSRSSSRSRNSSRNSTPGSSRGTSPARMAGNGGDAALALLLLDRLNQLESKMSGKGQQQQGQTVTKKSAAEASKKPRQKRTATKAYNVTQAFGRRGPEQTQGNFGDQELIRQGTDYKHWPQIAQFAPSASAFFGMSRIGMEVTPSGTWLTYTGAIKLDDKDPNFKDQVILLNKHIDAYKTFPPTEPKKDKKKKADETQALPQRQKKQQTVTLLPAAD…	mRNA#3842_3_copies:polyA_is_-1 coordinates are BetaCoV/England/02/2020; mRNA#884_13_copies:polyA_is_-1 coordinates are BetaCoV/England/02/2020; mRNA#3810_4_copies:polyA_is_-1 coordinates are BetaCoV/England/02/2020; mRNA#2164_6_copies:polyA_is_-1 coordinates are BetaCoV/England/02/2020; mRNA#470_26_copies:polyA_is_-1 coordinates are BetaCoV/England/02/2020; mRNA#1553_8_copies:polyA_is_-1 coordina…
SARS2_N	1	37	61	SKQRRPQGLPNNTASWFTALTQHGK	MSDNGPQNQRNAPRITFGGPSDSTGSNQNGERSGARSKQRRPQGLPNNTASWFTALTQHGKEDLKFPRGQGVPINTNSSPDDQIGYYRRATRRIRGGDGKMKDLSPRWYFYYLGTGPEAGLPYGANKDGIIWVATEGALNTPKDHIGTRNPANNAAIVLQLPQGTTLPKGFYAEGSRGGSQASSRSSSRSRNSSRNSTPGSSRGTSPARMAGNGGDAALALLLLDRLNQLESKMSGKGQQQQGQTVTKKSAAEASKKPRQKRTATKAYNVTQAFGRRGPEQTQGNFGDQELIRQGTDYKHWPQIAQFAPSASAFFGMSRIGMEVTPSGTWLTYTGAIKLDDKDPNFKDQVILLNKHIDAYKTFPPTEPKKDKKKKADETQALPQRQKKQQTVTLLPAAD…	mRNA#3842_3_copies:polyA_is_-1 coordinates are BetaCoV/England/02/2020; mRNA#884_13_copies:polyA_is_-1 coordinates are BetaCoV/England/02/2020; mRNA#3810_4_copies:polyA_is_-1 coordinates are BetaCoV/England/02/2020; mRNA#2164_6_copies:polyA_is_-1 coordinates are BetaCoV/England/02/2020; mRNA#4484_3_copies:polyA_is_-1 coordinates are BetaCoV/England/02/2020; mRNA#470_26_copies:polyA_is_-1 coordina…
SARS2_N	142	41	61	RPQGLPNNTASWFTALTQHGK	MSDNGPQNQRNAPRITFGGPSDSTGSNQNGERSGARSKQRRPQGLPNNTASWFTALTQHGKEDLKFPRGQGVPINTNSSPDDQIGYYRRATRRIRGGDGKMKDLSPRWYFYYLGTGPEAGLPYGANKDGIIWVATEGALNTPKDHIGTRNPANNAAIVLQLPQGTTLPKGFYAEGSRGGSQASSRSSSRSRNSSRNSTPGSSRGTSPARMAGNGGDAALALLLLDRLNQLESKMSGKGQQQQGQTVTKKSAAEASKKPRQKRTATKAYNVTQAFGRRGPEQTQGNFGDQELIRQGTDYKHWPQIAQFAPSASAFFGMSRIGMEVTPSGTWLTYTGAIKLDDKDPNFKDQVILLNKHIDAYKTFPPTEPKKDKKKKADETQALPQRQKKQQTVTLLPAAD…	mRNA#3842_3_copies:polyA_is_-1 coordinates are BetaCoV/England/02/2020; mRNA#884_13_copies:polyA_is_-1 coordinates are BetaCoV/England/02/2020; mRNA#3810_4_copies:polyA_is_-1 coordinates are BetaCoV/England/02/2020; mRNA#2164_6_copies:polyA_is_-1 coordinates are BetaCoV/England/02/2020; mRNA#4484_3_copies:polyA_is_-1 coordinates are BetaCoV/England/02/2020; mRNA#470_26_copies:polyA_is_-1 coordina…
SARS2_N	109	41	65	RPQGLPNNTASWFTALTQHGKEDLK	MSDNGPQNQRNAPRITFGGPSDSTGSNQNGERSGARSKQRRPQGLPNNTASWFTALTQHGKEDLKFPRGQGVPINTNSSPDDQIGYYRRATRRIRGGDGKMKDLSPRWYFYYLGTGPEAGLPYGANKDGIIWVATEGALNTPKDHIGTRNPANNAAIVLQLPQGTTLPKGFYAEGSRGGSQASSRSSSRSRNSSRNSTPGSSRGTSPARMAGNGGDAALALLLLDRLNQLESKMSGKGQQQQGQTVTKKSAAEASKKPRQKRTATKAYNVTQAFGRRGPEQTQGNFGDQELIRQGTDYKHWPQIAQFAPSASAFFGMSRIGMEVTPSGTWLTYTGAIKLDDKDPNFKDQVILLNKHIDAYKTFPPTEPKKDKKKKADETQALPQRQKKQQTVTLLPAAD…	mRNA#3842_3_copies:polyA_is_-1 coordinates are BetaCoV/England/02/2020; mRNA#884_13_copies:polyA_is_-1 coordinates are BetaCoV/England/02/2020; mRNA#2164_6_copies:polyA_is_-1 coordinates are BetaCoV/England/02/2020; mRNA#4484_3_copies:polyA_is_-1 coordinates are BetaCoV/England/02/2020; mRNA#470_26_copies:polyA_is_-1 coordinates are BetaCoV/England/02/2020; mRNA#1553_8_copies:polyA_is_-1 coordina…
SARS2_N	26	41	68	RPQGLPNNTASWFTALTQHGKEDLKFPR	MSDNGPQNQRNAPRITFGGPSDSTGSNQNGERSGARSKQRRPQGLPNNTASWFTALTQHGKEDLKFPRGQGVPINTNSSPDDQIGYYRRATRRIRGGDGKMKDLSPRWYFYYLGTGPEAGLPYGANKDGIIWVATEGALNTPKDHIGTRNPANNAAIVLQLPQGTTLPKGFYAEGSRGGSQASSRSSSRSRNSSRNSTPGSSRGTSPARMAGNGGDAALALLLLDRLNQLESKMSGKGQQQQGQTVTKKSAAEASKKPRQKRTATKAYNVTQAFGRRGPEQTQGNFGDQELIRQGTDYKHWPQIAQFAPSASAFFGMSRIGMEVTPSGTWLTYTGAIKLDDKDPNFKDQVILLNKHIDAYKTFPPTEPKKDKKKKADETQALPQRQKKQQTVTLLPAAD…	mRNA#3842_3_copies:polyA_is_-1 coordinates are BetaCoV/England/02/2020; mRNA#884_13_copies:polyA_is_-1 coordinates are BetaCoV/England/02/2020; mRNA#2164_6_copies:polyA_is_-1 coordinates are BetaCoV/England/02/2020; mRNA#4484_3_copies:polyA_is_-1 coordinates are BetaCoV/England/02/2020; mRNA#470_26_copies:polyA_is_-1 coordinates are BetaCoV/England/02/2020; mRNA#1553_8_copies:polyA_is_-1 coordina…
SARS2_N	22	62	68	EDLKFPR	MSDNGPQNQRNAPRITFGGPSDSTGSNQNGERSGARSKQRRPQGLPNNTASWFTALTQHGKEDLKFPRGQGVPINTNSSPDDQIGYYRRATRRIRGGDGKMKDLSPRWYFYYLGTGPEAGLPYGANKDGIIWVATEGALNTPKDHIGTRNPANNAAIVLQLPQGTTLPKGFYAEGSRGGSQASSRSSSRSRNSSRNSTPGSSRGTSPARMAGNGGDAALALLLLDRLNQLESKMSGKGQQQQGQTVTKKSAAEASKKPRQKRTATKAYNVTQAFGRRGPEQTQGNFGDQELIRQGTDYKHWPQIAQFAPSASAFFGMSRIGMEVTPSGTWLTYTGAIKLDDKDPNFKDQVILLNKHIDAYKTFPPTEPKKDKKKKADETQALPQRQKKQQTVTLLPAAD…	mRNA#3842_3_copies:polyA_is_-1 coordinates are BetaCoV/England/02/2020; mRNA#884_13_copies:polyA_is_-1 coordinates are BetaCoV/England/02/2020; mRNA#2164_6_copies:polyA_is_-1 coordinates are BetaCoV/England/02/2020; mRNA#4484_3_copies:polyA_is_-1 coordinates are BetaCoV/England/02/2020; mRNA#470_26_copies:polyA_is_-1 coordinates are BetaCoV/England/02/2020; mRNA#1553_8_copies:polyA_is_-1 coordina…
SARS2_N	105	69	88	GQGVPINTNSSPDDQIGYYR	MSDNGPQNQRNAPRITFGGPSDSTGSNQNGERSGARSKQRRPQGLPNNTASWFTALTQHGKEDLKFPRGQGVPINTNSSPDDQIGYYRRATRRIRGGDGKMKDLSPRWYFYYLGTGPEAGLPYGANKDGIIWVATEGALNTPKDHIGTRNPANNAAIVLQLPQGTTLPKGFYAEGSRGGSQASSRSSSRSRNSSRNSTPGSSRGTSPARMAGNGGDAALALLLLDRLNQLESKMSGKGQQQQGQTVTKKSAAEASKKPRQKRTATKAYNVTQAFGRRGPEQTQGNFGDQELIRQGTDYKHWPQIAQFAPSASAFFGMSRIGMEVTPSGTWLTYTGAIKLDDKDPNFKDQVILLNKHIDAYKTFPPTEPKKDKKKKADETQALPQRQKKQQTVTLLPAAD…	mRNA#884_13_copies:polyA_is_-1 coordinates are BetaCoV/England/02/2020; mRNA#2164_6_copies:polyA_is_-1 coordinates are BetaCoV/England/02/2020; mRNA#4484_3_copies:polyA_is_-1 coordinates are BetaCoV/England/02/2020; mRNA#470_26_copies:polyA_is_-1 coordinates are BetaCoV/England/02/2020; mRNA#1553_8_copies:polyA_is_-1 coordinates are BetaCoV/England/02/2020; mRNA#5069_3_copies:polyA_is_-1 coordina…
SARS2_N	65	69	89	GQGVPINTNSSPDDQIGYYRR	MSDNGPQNQRNAPRITFGGPSDSTGSNQNGERSGARSKQRRPQGLPNNTASWFTALTQHGKEDLKFPRGQGVPINTNSSPDDQIGYYRRATRRIRGGDGKMKDLSPRWYFYYLGTGPEAGLPYGANKDGIIWVATEGALNTPKDHIGTRNPANNAAIVLQLPQGTTLPKGFYAEGSRGGSQASSRSSSRSRNSSRNSTPGSSRGTSPARMAGNGGDAALALLLLDRLNQLESKMSGKGQQQQGQTVTKKSAAEASKKPRQKRTATKAYNVTQAFGRRGPEQTQGNFGDQELIRQGTDYKHWPQIAQFAPSASAFFGMSRIGMEVTPSGTWLTYTGAIKLDDKDPNFKDQVILLNKHIDAYKTFPPTEPKKDKKKKADETQALPQRQKKQQTVTLLPAAD…	mRNA#5255_3_copies:polyA_is_-1 coordinates are BetaCoV/England/02/2020; mRNA#884_13_copies:polyA_is_-1 coordinates are BetaCoV/England/02/2020; mRNA#2164_6_copies:polyA_is_-1 coordinates are BetaCoV/England/02/2020; mRNA#4484_3_copies:polyA_is_-1 coordinates are BetaCoV/England/02/2020; mRNA#470_26_copies:polyA_is_-1 coordinates are BetaCoV/England/02/2020; mRNA#1553_8_copies:polyA_is_-1 coordina…
SARS2_N	1	96	107	GGDGKMKDLSPR	MSDNGPQNQRNAPRITFGGPSDSTGSNQNGERSGARSKQRRPQGLPNNTASWFTALTQHGKEDLKFPRGQGVPINTNSSPDDQIGYYRRATRRIRGGDGKMKDLSPRWYFYYLGTGPEAGLPYGANKDGIIWVATEGALNTPKDHIGTRNPANNAAIVLQLPQGTTLPKGFYAEGSRGGSQASSRSSSRSRNSSRNSTPGSSRGTSPARMAGNGGDAALALLLLDRLNQLESKMSGKGQQQQGQTVTKKSAAEASKKPRQKRTATKAYNVTQAFGRRGPEQTQGNFGDQELIRQGTDYKHWPQIAQFAPSASAFFGMSRIGMEVTPSGTWLTYTGAIKLDDKDPNFKDQVILLNKHIDAYKTFPPTEPKKDKKKKADETQALPQRQKKQQTVTLLPAAD…	mRNA#5255_3_copies:polyA_is_-1 coordinates are BetaCoV/England/02/2020; mRNA#884_13_copies:polyA_is_-1 coordinates are BetaCoV/England/02/2020; mRNA#2164_6_copies:polyA_is_-1 coordinates are BetaCoV/England/02/2020; mRNA#4484_3_copies:polyA_is_-1 coordinates are BetaCoV/England/02/2020; mRNA#470_26_copies:polyA_is_-1 coordinates are BetaCoV/England/02/2020; mRNA#1553_8_copies:polyA_is_-1 coordina…
SARS2_N	8	101	107	MKDLSPR	MSDNGPQNQRNAPRITFGGPSDSTGSNQNGERSGARSKQRRPQGLPNNTASWFTALTQHGKEDLKFPRGQGVPINTNSSPDDQIGYYRRATRRIRGGDGKMKDLSPRWYFYYLGTGPEAGLPYGANKDGIIWVATEGALNTPKDHIGTRNPANNAAIVLQLPQGTTLPKGFYAEGSRGGSQASSRSSSRSRNSSRNSTPGSSRGTSPARMAGNGGDAALALLLLDRLNQLESKMSGKGQQQQGQTVTKKSAAEASKKPRQKRTATKAYNVTQAFGRRGPEQTQGNFGDQELIRQGTDYKHWPQIAQFAPSASAFFGMSRIGMEVTPSGTWLTYTGAIKLDDKDPNFKDQVILLNKHIDAYKTFPPTEPKKDKKKKADETQALPQRQKKQQTVTLLPAAD…	mRNA#884_13_copies:polyA_is_-1 coordinates are BetaCoV/England/02/2020; mRNA#2164_6_copies:polyA_is_-1 coordinates are BetaCoV/England/02/2020; mRNA#4484_3_copies:polyA_is_-1 coordinates are BetaCoV/England/02/2020; mRNA#470_26_copies:polyA_is_-1 coordinates are BetaCoV/England/02/2020; mRNA#1553_8_copies:polyA_is_-1 coordinates are BetaCoV/England/02/2020; mRNA#5069_3_copies:polyA_is_-1 coordina…
SARS2_N	2	101	127	MKDLSPRWYFYYLGTGPEAGLPYGANK	MSDNGPQNQRNAPRITFGGPSDSTGSNQNGERSGARSKQRRPQGLPNNTASWFTALTQHGKEDLKFPRGQGVPINTNSSPDDQIGYYRRATRRIRGGDGKMKDLSPRWYFYYLGTGPEAGLPYGANKDGIIWVATEGALNTPKDHIGTRNPANNAAIVLQLPQGTTLPKGFYAEGSRGGSQASSRSSSRSRNSSRNSTPGSSRGTSPARMAGNGGDAALALLLLDRLNQLESKMSGKGQQQQGQTVTKKSAAEASKKPRQKRTATKAYNVTQAFGRRGPEQTQGNFGDQELIRQGTDYKHWPQIAQFAPSASAFFGMSRIGMEVTPSGTWLTYTGAIKLDDKDPNFKDQVILLNKHIDAYKTFPPTEPKKDKKKKADETQALPQRQKKQQTVTLLPAAD…	mRNA#5255_3_copies:polyA_is_-1 coordinates are BetaCoV/England/02/2020; mRNA#884_13_copies:polyA_is_-1 coordinates are BetaCoV/England/02/2020; mRNA#2164_6_copies:polyA_is_-1 coordinates are BetaCoV/England/02/2020; mRNA#470_26_copies:polyA_is_-1 coordinates are BetaCoV/England/02/2020; mRNA#1553_8_copies:polyA_is_-1 coordinates are BetaCoV/England/02/2020; mRNA#5069_3_copies:polyA_is_-1 coordina…
SARS2_N	6	103	127	DLSPRWYFYYLGTGPEAGLPYGANK	MSDNGPQNQRNAPRITFGGPSDSTGSNQNGERSGARSKQRRPQGLPNNTASWFTALTQHGKEDLKFPRGQGVPINTNSSPDDQIGYYRRATRRIRGGDGKMKDLSPRWYFYYLGTGPEAGLPYGANKDGIIWVATEGALNTPKDHIGTRNPANNAAIVLQLPQGTTLPKGFYAEGSRGGSQASSRSSSRSRNSSRNSTPGSSRGTSPARMAGNGGDAALALLLLDRLNQLESKMSGKGQQQQGQTVTKKSAAEASKKPRQKRTATKAYNVTQAFGRRGPEQTQGNFGDQELIRQGTDYKHWPQIAQFAPSASAFFGMSRIGMEVTPSGTWLTYTGAIKLDDKDPNFKDQVILLNKHIDAYKTFPPTEPKKDKKKKADETQALPQRQKKQQTVTLLPAAD…	mRNA#884_13_copies:polyA_is_-1 coordinates are BetaCoV/England/02/2020; mRNA#2164_6_copies:polyA_is_-1 coordinates are BetaCoV/England/02/2020; mRNA#470_26_copies:polyA_is_-1 coordinates are BetaCoV/England/02/2020; mRNA#1553_8_copies:polyA_is_-1 coordinates are BetaCoV/England/02/2020; mRNA#5069_3_copies:polyA_is_-1 coordinates are BetaCoV/England/02/2020; mRNA#4077_3_copies:polyA_is_-1 coordina…
SARS2_N	1	103	143	DLSPRWYFYYLGTGPEAGLPYGANKDGIIWVATEGALNTPK	MSDNGPQNQRNAPRITFGGPSDSTGSNQNGERSGARSKQRRPQGLPNNTASWFTALTQHGKEDLKFPRGQGVPINTNSSPDDQIGYYRRATRRIRGGDGKMKDLSPRWYFYYLGTGPEAGLPYGANKDGIIWVATEGALNTPKDHIGTRNPANNAAIVLQLPQGTTLPKGFYAEGSRGGSQASSRSSSRSRNSSRNSTPGSSRGTSPARMAGNGGDAALALLLLDRLNQLESKMSGKGQQQQGQTVTKKSAAEASKKPRQKRTATKAYNVTQAFGRRGPEQTQGNFGDQELIRQGTDYKHWPQIAQFAPSASAFFGMSRIGMEVTPSGTWLTYTGAIKLDDKDPNFKDQVILLNKHIDAYKTFPPTEPKKDKKKKADETQALPQRQKKQQTVTLLPAAD…	mRNA#5255_3_copies:polyA_is_-1 coordinates are BetaCoV/England/02/2020; mRNA#884_13_copies:polyA_is_-1 coordinates are BetaCoV/England/02/2020; mRNA#2164_6_copies:polyA_is_-1 coordinates are BetaCoV/England/02/2020; mRNA#470_26_copies:polyA_is_-1 coordinates are BetaCoV/England/02/2020; mRNA#1553_8_copies:polyA_is_-1 coordinates are BetaCoV/England/02/2020; mRNA#5069_3_copies:polyA_is_-1 coordina…
SARS2_N	276	108	127	WYFYYLGTGPEAGLPYGANK	MSDNGPQNQRNAPRITFGGPSDSTGSNQNGERSGARSKQRRPQGLPNNTASWFTALTQHGKEDLKFPRGQGVPINTNSSPDDQIGYYRRATRRIRGGDGKMKDLSPRWYFYYLGTGPEAGLPYGANKDGIIWVATEGALNTPKDHIGTRNPANNAAIVLQLPQGTTLPKGFYAEGSRGGSQASSRSSSRSRNSSRNSTPGSSRGTSPARMAGNGGDAALALLLLDRLNQLESKMSGKGQQQQGQTVTKKSAAEASKKPRQKRTATKAYNVTQAFGRRGPEQTQGNFGDQELIRQGTDYKHWPQIAQFAPSASAFFGMSRIGMEVTPSGTWLTYTGAIKLDDKDPNFKDQVILLNKHIDAYKTFPPTEPKKDKKKKADETQALPQRQKKQQTVTLLPAAD…	mRNA#884_13_copies:polyA_is_-1 coordinates are BetaCoV/England/02/2020; mRNA#2164_6_copies:polyA_is_-1 coordinates are BetaCoV/England/02/2020; mRNA#470_26_copies:polyA_is_-1 coordinates are BetaCoV/England/02/2020; mRNA#1553_8_copies:polyA_is_-1 coordinates are BetaCoV/England/02/2020; mRNA#5069_3_copies:polyA_is_-1 coordinates are BetaCoV/England/02/2020; mRNA#4077_3_copies:polyA_is_-1 coordina…
SARS2_N	10	108	143	WYFYYLGTGPEAGLPYGANKDGIIWVATEGALNTPK	MSDNGPQNQRNAPRITFGGPSDSTGSNQNGERSGARSKQRRPQGLPNNTASWFTALTQHGKEDLKFPRGQGVPINTNSSPDDQIGYYRRATRRIRGGDGKMKDLSPRWYFYYLGTGPEAGLPYGANKDGIIWVATEGALNTPKDHIGTRNPANNAAIVLQLPQGTTLPKGFYAEGSRGGSQASSRSSSRSRNSSRNSTPGSSRGTSPARMAGNGGDAALALLLLDRLNQLESKMSGKGQQQQGQTVTKKSAAEASKKPRQKRTATKAYNVTQAFGRRGPEQTQGNFGDQELIRQGTDYKHWPQIAQFAPSASAFFGMSRIGMEVTPSGTWLTYTGAIKLDDKDPNFKDQVILLNKHIDAYKTFPPTEPKKDKKKKADETQALPQRQKKQQTVTLLPAAD…	mRNA#5255_3_copies:polyA_is_-1 coordinates are BetaCoV/England/02/2020; mRNA#884_13_copies:polyA_is_-1 coordinates are BetaCoV/England/02/2020; mRNA#2164_6_copies:polyA_is_-1 coordinates are BetaCoV/England/02/2020; mRNA#470_26_copies:polyA_is_-1 coordinates are BetaCoV/England/02/2020; mRNA#1553_8_copies:polyA_is_-1 coordinates are BetaCoV/England/02/2020; mRNA#5069_3_copies:polyA_is_-1 coordina…
SARS2_N	351	128	143	DGIIWVATEGALNTPK	MSDNGPQNQRNAPRITFGGPSDSTGSNQNGERSGARSKQRRPQGLPNNTASWFTALTQHGKEDLKFPRGQGVPINTNSSPDDQIGYYRRATRRIRGGDGKMKDLSPRWYFYYLGTGPEAGLPYGANKDGIIWVATEGALNTPKDHIGTRNPANNAAIVLQLPQGTTLPKGFYAEGSRGGSQASSRSSSRSRNSSRNSTPGSSRGTSPARMAGNGGDAALALLLLDRLNQLESKMSGKGQQQQGQTVTKKSAAEASKKPRQKRTATKAYNVTQAFGRRGPEQTQGNFGDQELIRQGTDYKHWPQIAQFAPSASAFFGMSRIGMEVTPSGTWLTYTGAIKLDDKDPNFKDQVILLNKHIDAYKTFPPTEPKKDKKKKADETQALPQRQKKQQTVTLLPAAD…	mRNA#5255_3_copies:polyA_is_-1 coordinates are BetaCoV/England/02/2020; mRNA#884_13_copies:polyA_is_-1 coordinates are BetaCoV/England/02/2020; mRNA#2164_6_copies:polyA_is_-1 coordinates are BetaCoV/England/02/2020; mRNA#470_26_copies:polyA_is_-1 coordinates are BetaCoV/England/02/2020; mRNA#1553_8_copies:polyA_is_-1 coordinates are BetaCoV/England/02/2020; mRNA#5069_3_copies:polyA_is_-1 coordina…
SARS2_N	32	128	149	DGIIWVATEGALNTPKDHIGTR	MSDNGPQNQRNAPRITFGGPSDSTGSNQNGERSGARSKQRRPQGLPNNTASWFTALTQHGKEDLKFPRGQGVPINTNSSPDDQIGYYRRATRRIRGGDGKMKDLSPRWYFYYLGTGPEAGLPYGANKDGIIWVATEGALNTPKDHIGTRNPANNAAIVLQLPQGTTLPKGFYAEGSRGGSQASSRSSSRSRNSSRNSTPGSSRGTSPARMAGNGGDAALALLLLDRLNQLESKMSGKGQQQQGQTVTKKSAAEASKKPRQKRTATKAYNVTQAFGRRGPEQTQGNFGDQELIRQGTDYKHWPQIAQFAPSASAFFGMSRIGMEVTPSGTWLTYTGAIKLDDKDPNFKDQVILLNKHIDAYKTFPPTEPKKDKKKKADETQALPQRQKKQQTVTLLPAAD…	mRNA#5255_3_copies:polyA_is_-1 coordinates are BetaCoV/England/02/2020; mRNA#884_13_copies:polyA_is_-1 coordinates are BetaCoV/England/02/2020; mRNA#2164_6_copies:polyA_is_-1 coordinates are BetaCoV/England/02/2020; mRNA#470_26_copies:polyA_is_-1 coordinates are BetaCoV/England/02/2020; mRNA#1553_8_copies:polyA_is_-1 coordinates are BetaCoV/England/02/2020; mRNA#5069_3_copies:polyA_is_-1 coordina…
SARS2_N	2	128	169	DGIIWVATEGALNTPKDHIGTRNPANNAAIVLQLPQGTTLPK	MSDNGPQNQRNAPRITFGGPSDSTGSNQNGERSGARSKQRRPQGLPNNTASWFTALTQHGKEDLKFPRGQGVPINTNSSPDDQIGYYRRATRRIRGGDGKMKDLSPRWYFYYLGTGPEAGLPYGANKDGIIWVATEGALNTPKDHIGTRNPANNAAIVLQLPQGTTLPKGFYAEGSRGGSQASSRSSSRSRNSSRNSTPGSSRGTSPARMAGNGGDAALALLLLDRLNQLESKMSGKGQQQQGQTVTKKSAAEASKKPRQKRTATKAYNVTQAFGRRGPEQTQGNFGDQELIRQGTDYKHWPQIAQFAPSASAFFGMSRIGMEVTPSGTWLTYTGAIKLDDKDPNFKDQVILLNKHIDAYKTFPPTEPKKDKKKKADETQALPQRQKKQQTVTLLPAAD…	mRNA#5255_3_copies:polyA_is_-1 coordinates are BetaCoV/England/02/2020; mRNA#6373_2_copies:polyA_is_-1 coordinates are BetaCoV/England/02/2020; mRNA#884_13_copies:polyA_is_-1 coordinates are BetaCoV/England/02/2020; mRNA#2164_6_copies:polyA_is_-1 coordinates are BetaCoV/England/02/2020; mRNA#470_26_copies:polyA_is_-1 coordinates are BetaCoV/England/02/2020; mRNA#1553_8_copies:polyA_is_-1 coordina…
SARS2_N	20	144	169	DHIGTRNPANNAAIVLQLPQGTTLPK	MSDNGPQNQRNAPRITFGGPSDSTGSNQNGERSGARSKQRRPQGLPNNTASWFTALTQHGKEDLKFPRGQGVPINTNSSPDDQIGYYRRATRRIRGGDGKMKDLSPRWYFYYLGTGPEAGLPYGANKDGIIWVATEGALNTPKDHIGTRNPANNAAIVLQLPQGTTLPKGFYAEGSRGGSQASSRSSSRSRNSSRNSTPGSSRGTSPARMAGNGGDAALALLLLDRLNQLESKMSGKGQQQQGQTVTKKSAAEASKKPRQKRTATKAYNVTQAFGRRGPEQTQGNFGDQELIRQGTDYKHWPQIAQFAPSASAFFGMSRIGMEVTPSGTWLTYTGAIKLDDKDPNFKDQVILLNKHIDAYKTFPPTEPKKDKKKKADETQALPQRQKKQQTVTLLPAAD…	mRNA#5255_3_copies:polyA_is_-1 coordinates are BetaCoV/England/02/2020; mRNA#884_13_copies:polyA_is_-1 coordinates are BetaCoV/England/02/2020; mRNA#2164_6_copies:polyA_is_-1 coordinates are BetaCoV/England/02/2020; mRNA#470_26_copies:polyA_is_-1 coordinates are BetaCoV/England/02/2020; mRNA#1553_8_copies:polyA_is_-1 coordinates are BetaCoV/England/02/2020; mRNA#5069_3_copies:polyA_is_-1 coordina…
SARS2_N	148	150	169	NPANNAAIVLQLPQGTTLPK	MSDNGPQNQRNAPRITFGGPSDSTGSNQNGERSGARSKQRRPQGLPNNTASWFTALTQHGKEDLKFPRGQGVPINTNSSPDDQIGYYRRATRRIRGGDGKMKDLSPRWYFYYLGTGPEAGLPYGANKDGIIWVATEGALNTPKDHIGTRNPANNAAIVLQLPQGTTLPKGFYAEGSRGGSQASSRSSSRSRNSSRNSTPGSSRGTSPARMAGNGGDAALALLLLDRLNQLESKMSGKGQQQQGQTVTKKSAAEASKKPRQKRTATKAYNVTQAFGRRGPEQTQGNFGDQELIRQGTDYKHWPQIAQFAPSASAFFGMSRIGMEVTPSGTWLTYTGAIKLDDKDPNFKDQVILLNKHIDAYKTFPPTEPKKDKKKKADETQALPQRQKKQQTVTLLPAAD…	mRNA#5255_3_copies:polyA_is_-1 coordinates are BetaCoV/England/02/2020; mRNA#884_13_copies:polyA_is_-1 coordinates are BetaCoV/England/02/2020; mRNA#2164_6_copies:polyA_is_-1 coordinates are BetaCoV/England/02/2020; mRNA#470_26_copies:polyA_is_-1 coordinates are BetaCoV/England/02/2020; mRNA#1553_8_copies:polyA_is_-1 coordinates are BetaCoV/England/02/2020; mRNA#5069_3_copies:polyA_is_-1 coordina…
SARS2_N	12	150	177	NPANNAAIVLQLPQGTTLPKGFYAEGSR	MSDNGPQNQRNAPRITFGGPSDSTGSNQNGERSGARSKQRRPQGLPNNTASWFTALTQHGKEDLKFPRGQGVPINTNSSPDDQIGYYRRATRRIRGGDGKMKDLSPRWYFYYLGTGPEAGLPYGANKDGIIWVATEGALNTPKDHIGTRNPANNAAIVLQLPQGTTLPKGFYAEGSRGGSQASSRSSSRSRNSSRNSTPGSSRGTSPARMAGNGGDAALALLLLDRLNQLESKMSGKGQQQQGQTVTKKSAAEASKKPRQKRTATKAYNVTQAFGRRGPEQTQGNFGDQELIRQGTDYKHWPQIAQFAPSASAFFGMSRIGMEVTPSGTWLTYTGAIKLDDKDPNFKDQVILLNKHIDAYKTFPPTEPKKDKKKKADETQALPQRQKKQQTVTLLPAAD…	mRNA#5255_3_copies:polyA_is_-1 coordinates are BetaCoV/England/02/2020; mRNA#884_13_copies:polyA_is_-1 coordinates are BetaCoV/England/02/2020; mRNA#2164_6_copies:polyA_is_-1 coordinates are BetaCoV/England/02/2020; mRNA#470_26_copies:polyA_is_-1 coordinates are BetaCoV/England/02/2020; mRNA#1553_8_copies:polyA_is_-1 coordinates are BetaCoV/England/02/2020; mRNA#5069_3_copies:polyA_is_-1 coordina…
SARS2_N	1	150	185	NPANNAAIVLQLPQGTTLPKGFYAEGSRGGSQASSR	MSDNGPQNQRNAPRITFGGPSDSTGSNQNGERSGARSKQRRPQGLPNNTASWFTALTQHGKEDLKFPRGQGVPINTNSSPDDQIGYYRRATRRIRGGDGKMKDLSPRWYFYYLGTGPEAGLPYGANKDGIIWVATEGALNTPKDHIGTRNPANNAAIVLQLPQGTTLPKGFYAEGSRGGSQASSRSSSRSRNSSRNSTPGSSRGTSPARMAGNGGDAALALLLLDRLNQLESKMSGKGQQQQGQTVTKKSAAEASKKPRQKRTATKAYNVTQAFGRRGPEQTQGNFGDQELIRQGTDYKHWPQIAQFAPSASAFFGMSRIGMEVTPSGTWLTYTGAIKLDDKDPNFKDQVILLNKHIDAYKTFPPTEPKKDKKKKADETQALPQRQKKQQTVTLLPAAD…	mRNA#5255_3_copies:polyA_is_-1 coordinates are BetaCoV/England/02/2020; mRNA#884_13_copies:polyA_is_-1 coordinates are BetaCoV/England/02/2020; mRNA#2164_6_copies:polyA_is_-1 coordinates are BetaCoV/England/02/2020; mRNA#470_26_copies:polyA_is_-1 coordinates are BetaCoV/England/02/2020; mRNA#1553_8_copies:polyA_is_-1 coordinates are BetaCoV/England/02/2020; mRNA#5069_3_copies:polyA_is_-1 coordina…
SARS2_N	23	170	177	GFYAEGSR	MSDNGPQNQRNAPRITFGGPSDSTGSNQNGERSGARSKQRRPQGLPNNTASWFTALTQHGKEDLKFPRGQGVPINTNSSPDDQIGYYRRATRRIRGGDGKMKDLSPRWYFYYLGTGPEAGLPYGANKDGIIWVATEGALNTPKDHIGTRNPANNAAIVLQLPQGTTLPKGFYAEGSRGGSQASSRSSSRSRNSSRNSTPGSSRGTSPARMAGNGGDAALALLLLDRLNQLESKMSGKGQQQQGQTVTKKSAAEASKKPRQKRTATKAYNVTQAFGRRGPEQTQGNFGDQELIRQGTDYKHWPQIAQFAPSASAFFGMSRIGMEVTPSGTWLTYTGAIKLDDKDPNFKDQVILLNKHIDAYKTFPPTEPKKDKKKKADETQALPQRQKKQQTVTLLPAAD…	mRNA#5255_3_copies:polyA_is_-1 coordinates are BetaCoV/England/02/2020; mRNA#3842_3_copies:polyA_is_-1 coordinates are BetaCoV/England/02/2020; mRNA#884_13_copies:polyA_is_-1 coordinates are BetaCoV/England/02/2020; mRNA#2164_6_copies:polyA_is_-1 coordinates are BetaCoV/England/02/2020; mRNA#470_26_copies:polyA_is_-1 coordinates are BetaCoV/England/02/2020; mRNA#1553_8_copies:polyA_is_-1 coordina…
SARS2_N	1	170	185	GFYAEGSRGGSQASSR	MSDNGPQNQRNAPRITFGGPSDSTGSNQNGERSGARSKQRRPQGLPNNTASWFTALTQHGKEDLKFPRGQGVPINTNSSPDDQIGYYRRATRRIRGGDGKMKDLSPRWYFYYLGTGPEAGLPYGANKDGIIWVATEGALNTPKDHIGTRNPANNAAIVLQLPQGTTLPKGFYAEGSRGGSQASSRSSSRSRNSSRNSTPGSSRGTSPARMAGNGGDAALALLLLDRLNQLESKMSGKGQQQQGQTVTKKSAAEASKKPRQKRTATKAYNVTQAFGRRGPEQTQGNFGDQELIRQGTDYKHWPQIAQFAPSASAFFGMSRIGMEVTPSGTWLTYTGAIKLDDKDPNFKDQVILLNKHIDAYKTFPPTEPKKDKKKKADETQALPQRQKKQQTVTLLPAAD…	mRNA#5255_3_copies:polyA_is_-1 coordinates are BetaCoV/England/02/2020; mRNA#3842_3_copies:polyA_is_-1 coordinates are BetaCoV/England/02/2020; mRNA#884_13_copies:polyA_is_-1 coordinates are BetaCoV/England/02/2020; mRNA#2164_6_copies:polyA_is_-1 coordinates are BetaCoV/England/02/2020; mRNA#470_26_copies:polyA_is_-1 coordinates are BetaCoV/England/02/2020; mRNA#1553_8_copies:polyA_is_-1 coordina…
SARS2_N	5	178	185	GGSQASSR	MSDNGPQNQRNAPRITFGGPSDSTGSNQNGERSGARSKQRRPQGLPNNTASWFTALTQHGKEDLKFPRGQGVPINTNSSPDDQIGYYRRATRRIRGGDGKMKDLSPRWYFYYLGTGPEAGLPYGANKDGIIWVATEGALNTPKDHIGTRNPANNAAIVLQLPQGTTLPKGFYAEGSRGGSQASSRSSSRSRNSSRNSTPGSSRGTSPARMAGNGGDAALALLLLDRLNQLESKMSGKGQQQQGQTVTKKSAAEASKKPRQKRTATKAYNVTQAFGRRGPEQTQGNFGDQELIRQGTDYKHWPQIAQFAPSASAFFGMSRIGMEVTPSGTWLTYTGAIKLDDKDPNFKDQVILLNKHIDAYKTFPPTEPKKDKKKKADETQALPQRQKKQQTVTLLPAAD…	mRNA#5255_3_copies:polyA_is_-1 coordinates are BetaCoV/England/02/2020; mRNA#3842_3_copies:polyA_is_-1 coordinates are BetaCoV/England/02/2020; mRNA#884_13_copies:polyA_is_-1 coordinates are BetaCoV/England/02/2020; mRNA#2164_6_copies:polyA_is_-1 coordinates are BetaCoV/England/02/2020; mRNA#470_26_copies:polyA_is_-1 coordinates are BetaCoV/England/02/2020; mRNA#1553_8_copies:polyA_is_-1 coordina…
SARS2_N	4	196	203	NSTPGSSR	MSDNGPQNQRNAPRITFGGPSDSTGSNQNGERSGARSKQRRPQGLPNNTASWFTALTQHGKEDLKFPRGQGVPINTNSSPDDQIGYYRRATRRIRGGDGKMKDLSPRWYFYYLGTGPEAGLPYGANKDGIIWVATEGALNTPKDHIGTRNPANNAAIVLQLPQGTTLPKGFYAEGSRGGSQASSRSSSRSRNSSRNSTPGSSRGTSPARMAGNGGDAALALLLLDRLNQLESKMSGKGQQQQGQTVTKKSAAEASKKPRQKRTATKAYNVTQAFGRRGPEQTQGNFGDQELIRQGTDYKHWPQIAQFAPSASAFFGMSRIGMEVTPSGTWLTYTGAIKLDDKDPNFKDQVILLNKHIDAYKTFPPTEPKKDKKKKADETQALPQRQKKQQTVTLLPAAD…	mRNA#5255_3_copies:polyA_is_-1 coordinates are BetaCoV/England/02/2020; mRNA#3842_3_copies:polyA_is_-1 coordinates are BetaCoV/England/02/2020; mRNA#884_13_copies:polyA_is_-1 coordinates are BetaCoV/England/02/2020; mRNA#2164_6_copies:polyA_is_-1 coordinates are BetaCoV/England/02/2020; mRNA#470_26_copies:polyA_is_-1 coordinates are BetaCoV/England/02/2020; mRNA#1553_8_copies:polyA_is_-1 coordina…
SARS2_N	884	210	226	MAGNGGDAALALLLLDR	MSDNGPQNQRNAPRITFGGPSDSTGSNQNGERSGARSKQRRPQGLPNNTASWFTALTQHGKEDLKFPRGQGVPINTNSSPDDQIGYYRRATRRIRGGDGKMKDLSPRWYFYYLGTGPEAGLPYGANKDGIIWVATEGALNTPKDHIGTRNPANNAAIVLQLPQGTTLPKGFYAEGSRGGSQASSRSSSRSRNSSRNSTPGSSRGTSPARMAGNGGDAALALLLLDRLNQLESKMSGKGQQQQGQTVTKKSAAEASKKPRQKRTATKAYNVTQAFGRRGPEQTQGNFGDQELIRQGTDYKHWPQIAQFAPSASAFFGMSRIGMEVTPSGTWLTYTGAIKLDDKDPNFKDQVILLNKHIDAYKTFPPTEPKKDKKKKADETQALPQRQKKQQTVTLLPAAD…	mRNA#5255_3_copies:polyA_is_-1 coordinates are BetaCoV/England/02/2020; mRNA#3842_3_copies:polyA_is_-1 coordinates are BetaCoV/England/02/2020; mRNA#884_13_copies:polyA_is_-1 coordinates are BetaCoV/England/02/2020; mRNA#5466_3_copies:polyA_is_-1 coordinates are BetaCoV/England/02/2020; mRNA#2164_6_copies:polyA_is_-1 coordinates are BetaCoV/England/02/2020; mRNA#470_26_copies:polyA_is_-1 coordina…
SARS2_N	216	210	233	MAGNGGDAALALLLLDRLNQLESK	MSDNGPQNQRNAPRITFGGPSDSTGSNQNGERSGARSKQRRPQGLPNNTASWFTALTQHGKEDLKFPRGQGVPINTNSSPDDQIGYYRRATRRIRGGDGKMKDLSPRWYFYYLGTGPEAGLPYGANKDGIIWVATEGALNTPKDHIGTRNPANNAAIVLQLPQGTTLPKGFYAEGSRGGSQASSRSSSRSRNSSRNSTPGSSRGTSPARMAGNGGDAALALLLLDRLNQLESKMSGKGQQQQGQTVTKKSAAEASKKPRQKRTATKAYNVTQAFGRRGPEQTQGNFGDQELIRQGTDYKHWPQIAQFAPSASAFFGMSRIGMEVTPSGTWLTYTGAIKLDDKDPNFKDQVILLNKHIDAYKTFPPTEPKKDKKKKADETQALPQRQKKQQTVTLLPAAD…	mRNA#5255_3_copies:polyA_is_-1 coordinates are BetaCoV/England/02/2020; mRNA#3842_3_copies:polyA_is_-1 coordinates are BetaCoV/England/02/2020; mRNA#884_13_copies:polyA_is_-1 coordinates are BetaCoV/England/02/2020; mRNA#5466_3_copies:polyA_is_-1 coordinates are BetaCoV/England/02/2020; mRNA#2164_6_copies:polyA_is_-1 coordinates are BetaCoV/England/02/2020; mRNA#470_26_copies:polyA_is_-1 coordina…
SARS2_N	2	210	237	MAGNGGDAALALLLLDRLNQLESKMSGK	MSDNGPQNQRNAPRITFGGPSDSTGSNQNGERSGARSKQRRPQGLPNNTASWFTALTQHGKEDLKFPRGQGVPINTNSSPDDQIGYYRRATRRIRGGDGKMKDLSPRWYFYYLGTGPEAGLPYGANKDGIIWVATEGALNTPKDHIGTRNPANNAAIVLQLPQGTTLPKGFYAEGSRGGSQASSRSSSRSRNSSRNSTPGSSRGTSPARMAGNGGDAALALLLLDRLNQLESKMSGKGQQQQGQTVTKKSAAEASKKPRQKRTATKAYNVTQAFGRRGPEQTQGNFGDQELIRQGTDYKHWPQIAQFAPSASAFFGMSRIGMEVTPSGTWLTYTGAIKLDDKDPNFKDQVILLNKHIDAYKTFPPTEPKKDKKKKADETQALPQRQKKQQTVTLLPAAD…	mRNA#5255_3_copies:polyA_is_-1 coordinates are BetaCoV/England/02/2020; mRNA#3842_3_copies:polyA_is_-1 coordinates are BetaCoV/England/02/2020; mRNA#884_13_copies:polyA_is_-1 coordinates are BetaCoV/England/02/2020; mRNA#5466_3_copies:polyA_is_-1 coordinates are BetaCoV/England/02/2020; mRNA#2164_6_copies:polyA_is_-1 coordinates are BetaCoV/England/02/2020; mRNA#470_26_copies:polyA_is_-1 coordina…
SARS2_N	2	227	233	LNQLESK	MSDNGPQNQRNAPRITFGGPSDSTGSNQNGERSGARSKQRRPQGLPNNTASWFTALTQHGKEDLKFPRGQGVPINTNSSPDDQIGYYRRATRRIRGGDGKMKDLSPRWYFYYLGTGPEAGLPYGANKDGIIWVATEGALNTPKDHIGTRNPANNAAIVLQLPQGTTLPKGFYAEGSRGGSQASSRSSSRSRNSSRNSTPGSSRGTSPARMAGNGGDAALALLLLDRLNQLESKMSGKGQQQQGQTVTKKSAAEASKKPRQKRTATKAYNVTQAFGRRGPEQTQGNFGDQELIRQGTDYKHWPQIAQFAPSASAFFGMSRIGMEVTPSGTWLTYTGAIKLDDKDPNFKDQVILLNKHIDAYKTFPPTEPKKDKKKKADETQALPQRQKKQQTVTLLPAAD…	mRNA#5255_3_copies:polyA_is_-1 coordinates are BetaCoV/England/02/2020; mRNA#3842_3_copies:polyA_is_-1 coordinates are BetaCoV/England/02/2020; mRNA#884_13_copies:polyA_is_-1 coordinates are BetaCoV/England/02/2020; mRNA#2164_6_copies:polyA_is_-1 coordinates are BetaCoV/England/02/2020; mRNA#470_26_copies:polyA_is_-1 coordinates are BetaCoV/England/02/2020; mRNA#1553_8_copies:polyA_is_-1 coordina…
SARS2_N	2	227	237	LNQLESKMSGK	MSDNGPQNQRNAPRITFGGPSDSTGSNQNGERSGARSKQRRPQGLPNNTASWFTALTQHGKEDLKFPRGQGVPINTNSSPDDQIGYYRRATRRIRGGDGKMKDLSPRWYFYYLGTGPEAGLPYGANKDGIIWVATEGALNTPKDHIGTRNPANNAAIVLQLPQGTTLPKGFYAEGSRGGSQASSRSSSRSRNSSRNSTPGSSRGTSPARMAGNGGDAALALLLLDRLNQLESKMSGKGQQQQGQTVTKKSAAEASKKPRQKRTATKAYNVTQAFGRRGPEQTQGNFGDQELIRQGTDYKHWPQIAQFAPSASAFFGMSRIGMEVTPSGTWLTYTGAIKLDDKDPNFKDQVILLNKHIDAYKTFPPTEPKKDKKKKADETQALPQRQKKQQTVTLLPAAD…	mRNA#5255_3_copies:polyA_is_-1 coordinates are BetaCoV/England/02/2020; mRNA#3842_3_copies:polyA_is_-1 coordinates are BetaCoV/England/02/2020; mRNA#884_13_copies:polyA_is_-1 coordinates are BetaCoV/England/02/2020; mRNA#2164_6_copies:polyA_is_-1 coordinates are BetaCoV/England/02/2020; mRNA#470_26_copies:polyA_is_-1 coordinates are BetaCoV/England/02/2020; mRNA#1553_8_copies:polyA_is_-1 coordina…
SARS2_N	12	234	248	MSGKGQQQQGQTVTK	MSDNGPQNQRNAPRITFGGPSDSTGSNQNGERSGARSKQRRPQGLPNNTASWFTALTQHGKEDLKFPRGQGVPINTNSSPDDQIGYYRRATRRIRGGDGKMKDLSPRWYFYYLGTGPEAGLPYGANKDGIIWVATEGALNTPKDHIGTRNPANNAAIVLQLPQGTTLPKGFYAEGSRGGSQASSRSSSRSRNSSRNSTPGSSRGTSPARMAGNGGDAALALLLLDRLNQLESKMSGKGQQQQGQTVTKKSAAEASKKPRQKRTATKAYNVTQAFGRRGPEQTQGNFGDQELIRQGTDYKHWPQIAQFAPSASAFFGMSRIGMEVTPSGTWLTYTGAIKLDDKDPNFKDQVILLNKHIDAYKTFPPTEPKKDKKKKADETQALPQRQKKQQTVTLLPAAD…	mRNA#5255_3_copies:polyA_is_-1 coordinates are BetaCoV/England/02/2020; mRNA#3842_3_copies:polyA_is_-1 coordinates are BetaCoV/England/02/2020; mRNA#884_13_copies:polyA_is_-1 coordinates are BetaCoV/England/02/2020; mRNA#2164_6_copies:polyA_is_-1 coordinates are BetaCoV/England/02/2020; mRNA#470_26_copies:polyA_is_-1 coordinates are BetaCoV/England/02/2020; mRNA#1553_8_copies:polyA_is_-1 coordina…
SARS2_N	1	234	249	MSGKGQQQQGQTVTKK	MSDNGPQNQRNAPRITFGGPSDSTGSNQNGERSGARSKQRRPQGLPNNTASWFTALTQHGKEDLKFPRGQGVPINTNSSPDDQIGYYRRATRRIRGGDGKMKDLSPRWYFYYLGTGPEAGLPYGANKDGIIWVATEGALNTPKDHIGTRNPANNAAIVLQLPQGTTLPKGFYAEGSRGGSQASSRSSSRSRNSSRNSTPGSSRGTSPARMAGNGGDAALALLLLDRLNQLESKMSGKGQQQQGQTVTKKSAAEASKKPRQKRTATKAYNVTQAFGRRGPEQTQGNFGDQELIRQGTDYKHWPQIAQFAPSASAFFGMSRIGMEVTPSGTWLTYTGAIKLDDKDPNFKDQVILLNKHIDAYKTFPPTEPKKDKKKKADETQALPQRQKKQQTVTLLPAAD…	mRNA#5255_3_copies:polyA_is_-1 coordinates are BetaCoV/England/02/2020; mRNA#3842_3_copies:polyA_is_-1 coordinates are BetaCoV/England/02/2020; mRNA#884_13_copies:polyA_is_-1 coordinates are BetaCoV/England/02/2020; mRNA#5466_3_copies:polyA_is_-1 coordinates are BetaCoV/England/02/2020; mRNA#2164_6_copies:polyA_is_-1 coordinates are BetaCoV/England/02/2020; mRNA#470_26_copies:polyA_is_-1 coordina…
SARS2_N	11	238	248	GQQQQGQTVTK	MSDNGPQNQRNAPRITFGGPSDSTGSNQNGERSGARSKQRRPQGLPNNTASWFTALTQHGKEDLKFPRGQGVPINTNSSPDDQIGYYRRATRRIRGGDGKMKDLSPRWYFYYLGTGPEAGLPYGANKDGIIWVATEGALNTPKDHIGTRNPANNAAIVLQLPQGTTLPKGFYAEGSRGGSQASSRSSSRSRNSSRNSTPGSSRGTSPARMAGNGGDAALALLLLDRLNQLESKMSGKGQQQQGQTVTKKSAAEASKKPRQKRTATKAYNVTQAFGRRGPEQTQGNFGDQELIRQGTDYKHWPQIAQFAPSASAFFGMSRIGMEVTPSGTWLTYTGAIKLDDKDPNFKDQVILLNKHIDAYKTFPPTEPKKDKKKKADETQALPQRQKKQQTVTLLPAAD…	mRNA#5255_3_copies:polyA_is_-1 coordinates are BetaCoV/England/02/2020; mRNA#3842_3_copies:polyA_is_-1 coordinates are BetaCoV/England/02/2020; mRNA#884_13_copies:polyA_is_-1 coordinates are BetaCoV/England/02/2020; mRNA#2164_6_copies:polyA_is_-1 coordinates are BetaCoV/England/02/2020; mRNA#470_26_copies:polyA_is_-1 coordinates are BetaCoV/England/02/2020; mRNA#1553_8_copies:polyA_is_-1 coordina…
SARS2_N	13	238	249	GQQQQGQTVTKK	MSDNGPQNQRNAPRITFGGPSDSTGSNQNGERSGARSKQRRPQGLPNNTASWFTALTQHGKEDLKFPRGQGVPINTNSSPDDQIGYYRRATRRIRGGDGKMKDLSPRWYFYYLGTGPEAGLPYGANKDGIIWVATEGALNTPKDHIGTRNPANNAAIVLQLPQGTTLPKGFYAEGSRGGSQASSRSSSRSRNSSRNSTPGSSRGTSPARMAGNGGDAALALLLLDRLNQLESKMSGKGQQQQGQTVTKKSAAEASKKPRQKRTATKAYNVTQAFGRRGPEQTQGNFGDQELIRQGTDYKHWPQIAQFAPSASAFFGMSRIGMEVTPSGTWLTYTGAIKLDDKDPNFKDQVILLNKHIDAYKTFPPTEPKKDKKKKADETQALPQRQKKQQTVTLLPAAD…	mRNA#5255_3_copies:polyA_is_-1 coordinates are BetaCoV/England/02/2020; mRNA#3842_3_copies:polyA_is_-1 coordinates are BetaCoV/England/02/2020; mRNA#884_13_copies:polyA_is_-1 coordinates are BetaCoV/England/02/2020; mRNA#5466_3_copies:polyA_is_-1 coordinates are BetaCoV/England/02/2020; mRNA#2164_6_copies:polyA_is_-1 coordinates are BetaCoV/England/02/2020; mRNA#470_26_copies:polyA_is_-1 coordina…
SARS2_N	2	238	256	GQQQQGQTVTKKSAAEASK	MSDNGPQNQRNAPRITFGGPSDSTGSNQNGERSGARSKQRRPQGLPNNTASWFTALTQHGKEDLKFPRGQGVPINTNSSPDDQIGYYRRATRRIRGGDGKMKDLSPRWYFYYLGTGPEAGLPYGANKDGIIWVATEGALNTPKDHIGTRNPANNAAIVLQLPQGTTLPKGFYAEGSRGGSQASSRSSSRSRNSSRNSTPGSSRGTSPARMAGNGGDAALALLLLDRLNQLESKMSGKGQQQQGQTVTKKSAAEASKKPRQKRTATKAYNVTQAFGRRGPEQTQGNFGDQELIRQGTDYKHWPQIAQFAPSASAFFGMSRIGMEVTPSGTWLTYTGAIKLDDKDPNFKDQVILLNKHIDAYKTFPPTEPKKDKKKKADETQALPQRQKKQQTVTLLPAAD…	mRNA#5255_3_copies:polyA_is_-1 coordinates are BetaCoV/England/02/2020; mRNA#3842_3_copies:polyA_is_-1 coordinates are BetaCoV/England/02/2020; mRNA#884_13_copies:polyA_is_-1 coordinates are BetaCoV/England/02/2020; mRNA#5466_3_copies:polyA_is_-1 coordinates are BetaCoV/England/02/2020; mRNA#2164_6_copies:polyA_is_-1 coordinates are BetaCoV/England/02/2020; mRNA#470_26_copies:polyA_is_-1 coordina…
SARS2_N	16	249	256	KSAAEASK	MSDNGPQNQRNAPRITFGGPSDSTGSNQNGERSGARSKQRRPQGLPNNTASWFTALTQHGKEDLKFPRGQGVPINTNSSPDDQIGYYRRATRRIRGGDGKMKDLSPRWYFYYLGTGPEAGLPYGANKDGIIWVATEGALNTPKDHIGTRNPANNAAIVLQLPQGTTLPKGFYAEGSRGGSQASSRSSSRSRNSSRNSTPGSSRGTSPARMAGNGGDAALALLLLDRLNQLESKMSGKGQQQQGQTVTKKSAAEASKKPRQKRTATKAYNVTQAFGRRGPEQTQGNFGDQELIRQGTDYKHWPQIAQFAPSASAFFGMSRIGMEVTPSGTWLTYTGAIKLDDKDPNFKDQVILLNKHIDAYKTFPPTEPKKDKKKKADETQALPQRQKKQQTVTLLPAAD…	mRNA#5255_3_copies:polyA_is_-1 coordinates are BetaCoV/England/02/2020; mRNA#3842_3_copies:polyA_is_-1 coordinates are BetaCoV/England/02/2020; mRNA#884_13_copies:polyA_is_-1 coordinates are BetaCoV/England/02/2020; mRNA#5466_3_copies:polyA_is_-1 coordinates are BetaCoV/England/02/2020; mRNA#2164_6_copies:polyA_is_-1 coordinates are BetaCoV/England/02/2020; mRNA#470_26_copies:polyA_is_-1 coordina…
SARS2_N	20	263	276	TATKAYNVTQAFGR	MSDNGPQNQRNAPRITFGGPSDSTGSNQNGERSGARSKQRRPQGLPNNTASWFTALTQHGKEDLKFPRGQGVPINTNSSPDDQIGYYRRATRRIRGGDGKMKDLSPRWYFYYLGTGPEAGLPYGANKDGIIWVATEGALNTPKDHIGTRNPANNAAIVLQLPQGTTLPKGFYAEGSRGGSQASSRSSSRSRNSSRNSTPGSSRGTSPARMAGNGGDAALALLLLDRLNQLESKMSGKGQQQQGQTVTKKSAAEASKKPRQKRTATKAYNVTQAFGRRGPEQTQGNFGDQELIRQGTDYKHWPQIAQFAPSASAFFGMSRIGMEVTPSGTWLTYTGAIKLDDKDPNFKDQVILLNKHIDAYKTFPPTEPKKDKKKKADETQALPQRQKKQQTVTLLPAAD…	mRNA#5255_3_copies:polyA_is_-1 coordinates are BetaCoV/England/02/2020; mRNA#3842_3_copies:polyA_is_-1 coordinates are BetaCoV/England/02/2020; mRNA#6373_2_copies:polyA_is_-1 coordinates are BetaCoV/England/02/2020; mRNA#5466_3_copies:polyA_is_-1 coordinates are BetaCoV/England/02/2020; mRNA#1553_8_copies:polyA_is_-1 coordinates are BetaCoV/England/02/2020; mRNA#5069_3_copies:polyA_is_-1 coordina…
SARS2_N	94	267	276	AYNVTQAFGR	MSDNGPQNQRNAPRITFGGPSDSTGSNQNGERSGARSKQRRPQGLPNNTASWFTALTQHGKEDLKFPRGQGVPINTNSSPDDQIGYYRRATRRIRGGDGKMKDLSPRWYFYYLGTGPEAGLPYGANKDGIIWVATEGALNTPKDHIGTRNPANNAAIVLQLPQGTTLPKGFYAEGSRGGSQASSRSSSRSRNSSRNSTPGSSRGTSPARMAGNGGDAALALLLLDRLNQLESKMSGKGQQQQGQTVTKKSAAEASKKPRQKRTATKAYNVTQAFGRRGPEQTQGNFGDQELIRQGTDYKHWPQIAQFAPSASAFFGMSRIGMEVTPSGTWLTYTGAIKLDDKDPNFKDQVILLNKHIDAYKTFPPTEPKKDKKKKADETQALPQRQKKQQTVTLLPAAD…	mRNA#5255_3_copies:polyA_is_-1 coordinates are BetaCoV/England/02/2020; mRNA#3842_3_copies:polyA_is_-1 coordinates are BetaCoV/England/02/2020; mRNA#6373_2_copies:polyA_is_-1 coordinates are BetaCoV/England/02/2020; mRNA#5466_3_copies:polyA_is_-1 coordinates are BetaCoV/England/02/2020; mRNA#1553_8_copies:polyA_is_-1 coordinates are BetaCoV/England/02/2020; mRNA#5069_3_copies:polyA_is_-1 coordina…
SARS2_N	1	267	277	AYNVTQAFGRR	MSDNGPQNQRNAPRITFGGPSDSTGSNQNGERSGARSKQRRPQGLPNNTASWFTALTQHGKEDLKFPRGQGVPINTNSSPDDQIGYYRRATRRIRGGDGKMKDLSPRWYFYYLGTGPEAGLPYGANKDGIIWVATEGALNTPKDHIGTRNPANNAAIVLQLPQGTTLPKGFYAEGSRGGSQASSRSSSRSRNSSRNSTPGSSRGTSPARMAGNGGDAALALLLLDRLNQLESKMSGKGQQQQGQTVTKKSAAEASKKPRQKRTATKAYNVTQAFGRRGPEQTQGNFGDQELIRQGTDYKHWPQIAQFAPSASAFFGMSRIGMEVTPSGTWLTYTGAIKLDDKDPNFKDQVILLNKHIDAYKTFPPTEPKKDKKKKADETQALPQRQKKQQTVTLLPAAD…	mRNA#5255_3_copies:polyA_is_-1 coordinates are BetaCoV/England/02/2020; mRNA#3842_3_copies:polyA_is_-1 coordinates are BetaCoV/England/02/2020; mRNA#6373_2_copies:polyA_is_-1 coordinates are BetaCoV/England/02/2020; mRNA#5466_3_copies:polyA_is_-1 coordinates are BetaCoV/England/02/2020; mRNA#1553_8_copies:polyA_is_-1 coordinates are BetaCoV/England/02/2020; mRNA#5069_3_copies:polyA_is_-1 coordina…
SARS2_N	237	277	293	RGPEQTQGNFGDQELIR	MSDNGPQNQRNAPRITFGGPSDSTGSNQNGERSGARSKQRRPQGLPNNTASWFTALTQHGKEDLKFPRGQGVPINTNSSPDDQIGYYRRATRRIRGGDGKMKDLSPRWYFYYLGTGPEAGLPYGANKDGIIWVATEGALNTPKDHIGTRNPANNAAIVLQLPQGTTLPKGFYAEGSRGGSQASSRSSSRSRNSSRNSTPGSSRGTSPARMAGNGGDAALALLLLDRLNQLESKMSGKGQQQQGQTVTKKSAAEASKKPRQKRTATKAYNVTQAFGRRGPEQTQGNFGDQELIRQGTDYKHWPQIAQFAPSASAFFGMSRIGMEVTPSGTWLTYTGAIKLDDKDPNFKDQVILLNKHIDAYKTFPPTEPKKDKKKKADETQALPQRQKKQQTVTLLPAAD…	mRNA#5255_3_copies:polyA_is_-1 coordinates are BetaCoV/England/02/2020; mRNA#3842_3_copies:polyA_is_-1 coordinates are BetaCoV/England/02/2020; mRNA#5466_3_copies:polyA_is_-1 coordinates are BetaCoV/England/02/2020; mRNA#1553_8_copies:polyA_is_-1 coordinates are BetaCoV/England/02/2020; mRNA#5069_3_copies:polyA_is_-1 coordinates are BetaCoV/England/02/2020; mRNA#207_69_copies:polyA_is_-1 coordina…
SARS2_N	61	278	293	GPEQTQGNFGDQELIR	MSDNGPQNQRNAPRITFGGPSDSTGSNQNGERSGARSKQRRPQGLPNNTASWFTALTQHGKEDLKFPRGQGVPINTNSSPDDQIGYYRRATRRIRGGDGKMKDLSPRWYFYYLGTGPEAGLPYGANKDGIIWVATEGALNTPKDHIGTRNPANNAAIVLQLPQGTTLPKGFYAEGSRGGSQASSRSSSRSRNSSRNSTPGSSRGTSPARMAGNGGDAALALLLLDRLNQLESKMSGKGQQQQGQTVTKKSAAEASKKPRQKRTATKAYNVTQAFGRRGPEQTQGNFGDQELIRQGTDYKHWPQIAQFAPSASAFFGMSRIGMEVTPSGTWLTYTGAIKLDDKDPNFKDQVILLNKHIDAYKTFPPTEPKKDKKKKADETQALPQRQKKQQTVTLLPAAD…	mRNA#5255_3_copies:polyA_is_-1 coordinates are BetaCoV/England/02/2020; mRNA#3842_3_copies:polyA_is_-1 coordinates are BetaCoV/England/02/2020; mRNA#5466_3_copies:polyA_is_-1 coordinates are BetaCoV/England/02/2020; mRNA#1553_8_copies:polyA_is_-1 coordinates are BetaCoV/England/02/2020; mRNA#5069_3_copies:polyA_is_-1 coordinates are BetaCoV/England/02/2020; mRNA#207_69_copies:polyA_is_-1 coordina…
SARS2_N	218	294	319	QGTDYKHWPQIAQFAPSASAFFGMSR	MSDNGPQNQRNAPRITFGGPSDSTGSNQNGERSGARSKQRRPQGLPNNTASWFTALTQHGKEDLKFPRGQGVPINTNSSPDDQIGYYRRATRRIRGGDGKMKDLSPRWYFYYLGTGPEAGLPYGANKDGIIWVATEGALNTPKDHIGTRNPANNAAIVLQLPQGTTLPKGFYAEGSRGGSQASSRSSSRSRNSSRNSTPGSSRGTSPARMAGNGGDAALALLLLDRLNQLESKMSGKGQQQQGQTVTKKSAAEASKKPRQKRTATKAYNVTQAFGRRGPEQTQGNFGDQELIRQGTDYKHWPQIAQFAPSASAFFGMSRIGMEVTPSGTWLTYTGAIKLDDKDPNFKDQVILLNKHIDAYKTFPPTEPKKDKKKKADETQALPQRQKKQQTVTLLPAAD…	mRNA#3842_3_copies:polyA_is_-1 coordinates are BetaCoV/England/02/2020; mRNA#6373_2_copies:polyA_is_-1 coordinates are BetaCoV/England/02/2020; mRNA#5466_3_copies:polyA_is_-1 coordinates are BetaCoV/England/02/2020; mRNA#1553_8_copies:polyA_is_-1 coordinates are BetaCoV/England/02/2020; mRNA#5069_3_copies:polyA_is_-1 coordinates are BetaCoV/England/02/2020; mRNA#207_69_copies:polyA_is_-1 coordina…
SARS2_N	844	300	319	HWPQIAQFAPSASAFFGMSR	MSDNGPQNQRNAPRITFGGPSDSTGSNQNGERSGARSKQRRPQGLPNNTASWFTALTQHGKEDLKFPRGQGVPINTNSSPDDQIGYYRRATRRIRGGDGKMKDLSPRWYFYYLGTGPEAGLPYGANKDGIIWVATEGALNTPKDHIGTRNPANNAAIVLQLPQGTTLPKGFYAEGSRGGSQASSRSSSRSRNSSRNSTPGSSRGTSPARMAGNGGDAALALLLLDRLNQLESKMSGKGQQQQGQTVTKKSAAEASKKPRQKRTATKAYNVTQAFGRRGPEQTQGNFGDQELIRQGTDYKHWPQIAQFAPSASAFFGMSRIGMEVTPSGTWLTYTGAIKLDDKDPNFKDQVILLNKHIDAYKTFPPTEPKKDKKKKADETQALPQRQKKQQTVTLLPAAD…	mRNA#3842_3_copies:polyA_is_-1 coordinates are BetaCoV/England/02/2020; mRNA#6373_2_copies:polyA_is_-1 coordinates are BetaCoV/England/02/2020; mRNA#5466_3_copies:polyA_is_-1 coordinates are BetaCoV/England/02/2020; mRNA#1553_8_copies:polyA_is_-1 coordinates are BetaCoV/England/02/2020; mRNA#5069_3_copies:polyA_is_-1 coordinates are BetaCoV/England/02/2020; mRNA#207_69_copies:polyA_is_-1 coordina…
SARS2_N	1	300	338	HWPQIAQFAPSASAFFGMSRIGMEVTPSGTWLTYTGAIK	MSDNGPQNQRNAPRITFGGPSDSTGSNQNGERSGARSKQRRPQGLPNNTASWFTALTQHGKEDLKFPRGQGVPINTNSSPDDQIGYYRRATRRIRGGDGKMKDLSPRWYFYYLGTGPEAGLPYGANKDGIIWVATEGALNTPKDHIGTRNPANNAAIVLQLPQGTTLPKGFYAEGSRGGSQASSRSSSRSRNSSRNSTPGSSRGTSPARMAGNGGDAALALLLLDRLNQLESKMSGKGQQQQGQTVTKKSAAEASKKPRQKRTATKAYNVTQAFGRRGPEQTQGNFGDQELIRQGTDYKHWPQIAQFAPSASAFFGMSRIGMEVTPSGTWLTYTGAIKLDDKDPNFKDQVILLNKHIDAYKTFPPTEPKKDKKKKADETQALPQRQKKQQTVTLLPAAD…	mRNA#3842_3_copies:polyA_is_-1 coordinates are BetaCoV/England/02/2020; mRNA#6373_2_copies:polyA_is_-1 coordinates are BetaCoV/England/02/2020; mRNA#5466_3_copies:polyA_is_-1 coordinates are BetaCoV/England/02/2020; mRNA#1553_8_copies:polyA_is_-1 coordinates are BetaCoV/England/02/2020; mRNA#7513_2_copies:polyA_is_-1 coordinates are BetaCoV/England/02/2020; mRNA#207_69_copies:polyA_is_-1 coordina…
SARS2_N	552	320	338	IGMEVTPSGTWLTYTGAIK	MSDNGPQNQRNAPRITFGGPSDSTGSNQNGERSGARSKQRRPQGLPNNTASWFTALTQHGKEDLKFPRGQGVPINTNSSPDDQIGYYRRATRRIRGGDGKMKDLSPRWYFYYLGTGPEAGLPYGANKDGIIWVATEGALNTPKDHIGTRNPANNAAIVLQLPQGTTLPKGFYAEGSRGGSQASSRSSSRSRNSSRNSTPGSSRGTSPARMAGNGGDAALALLLLDRLNQLESKMSGKGQQQQGQTVTKKSAAEASKKPRQKRTATKAYNVTQAFGRRGPEQTQGNFGDQELIRQGTDYKHWPQIAQFAPSASAFFGMSRIGMEVTPSGTWLTYTGAIKLDDKDPNFKDQVILLNKHIDAYKTFPPTEPKKDKKKKADETQALPQRQKKQQTVTLLPAAD…	mRNA#5255_3_copies:polyA_is_-1 coordinates are BetaCoV/England/02/2020; mRNA#3842_3_copies:polyA_is_-1 coordinates are BetaCoV/England/02/2020; mRNA#5466_3_copies:polyA_is_-1 coordinates are BetaCoV/England/02/2020; mRNA#1553_8_copies:polyA_is_-1 coordinates are BetaCoV/England/02/2020; mRNA#207_69_copies:polyA_is_-1 coordinates are BetaCoV/England/02/2020; mRNA#3612_4_copies:polyA_is_-1 coordina…
SARS2_N	6	320	347	IGMEVTPSGTWLTYTGAIKLDDKDPNFK	MSDNGPQNQRNAPRITFGGPSDSTGSNQNGERSGARSKQRRPQGLPNNTASWFTALTQHGKEDLKFPRGQGVPINTNSSPDDQIGYYRRATRRIRGGDGKMKDLSPRWYFYYLGTGPEAGLPYGANKDGIIWVATEGALNTPKDHIGTRNPANNAAIVLQLPQGTTLPKGFYAEGSRGGSQASSRSSSRSRNSSRNSTPGSSRGTSPARMAGNGGDAALALLLLDRLNQLESKMSGKGQQQQGQTVTKKSAAEASKKPRQKRTATKAYNVTQAFGRRGPEQTQGNFGDQELIRQGTDYKHWPQIAQFAPSASAFFGMSRIGMEVTPSGTWLTYTGAIKLDDKDPNFKDQVILLNKHIDAYKTFPPTEPKKDKKKKADETQALPQRQKKQQTVTLLPAAD…	mRNA#5255_3_copies:polyA_is_-1 coordinates are BetaCoV/England/02/2020; mRNA#3842_3_copies:polyA_is_-1 coordinates are BetaCoV/England/02/2020; mRNA#6373_2_copies:polyA_is_-1 coordinates are BetaCoV/England/02/2020; mRNA#5466_3_copies:polyA_is_-1 coordinates are BetaCoV/England/02/2020; mRNA#207_69_copies:polyA_is_-1 coordinates are BetaCoV/England/02/2020; mRNA#3612_4_copies:polyA_is_-1 coordina…
SARS2_N	17	339	347	LDDKDPNFK	MSDNGPQNQRNAPRITFGGPSDSTGSNQNGERSGARSKQRRPQGLPNNTASWFTALTQHGKEDLKFPRGQGVPINTNSSPDDQIGYYRRATRRIRGGDGKMKDLSPRWYFYYLGTGPEAGLPYGANKDGIIWVATEGALNTPKDHIGTRNPANNAAIVLQLPQGTTLPKGFYAEGSRGGSQASSRSSSRSRNSSRNSTPGSSRGTSPARMAGNGGDAALALLLLDRLNQLESKMSGKGQQQQGQTVTKKSAAEASKKPRQKRTATKAYNVTQAFGRRGPEQTQGNFGDQELIRQGTDYKHWPQIAQFAPSASAFFGMSRIGMEVTPSGTWLTYTGAIKLDDKDPNFKDQVILLNKHIDAYKTFPPTEPKKDKKKKADETQALPQRQKKQQTVTLLPAAD…	mRNA#5255_3_copies:polyA_is_-1 coordinates are BetaCoV/England/02/2020; mRNA#3842_3_copies:polyA_is_-1 coordinates are BetaCoV/England/02/2020; mRNA#6373_2_copies:polyA_is_-1 coordinates are BetaCoV/England/02/2020; mRNA#5466_3_copies:polyA_is_-1 coordinates are BetaCoV/England/02/2020; mRNA#207_69_copies:polyA_is_-1 coordinates are BetaCoV/England/02/2020; mRNA#3612_4_copies:polyA_is_-1 coordina…
SARS2_N	208	339	355	LDDKDPNFKDQVILLNK	MSDNGPQNQRNAPRITFGGPSDSTGSNQNGERSGARSKQRRPQGLPNNTASWFTALTQHGKEDLKFPRGQGVPINTNSSPDDQIGYYRRATRRIRGGDGKMKDLSPRWYFYYLGTGPEAGLPYGANKDGIIWVATEGALNTPKDHIGTRNPANNAAIVLQLPQGTTLPKGFYAEGSRGGSQASSRSSSRSRNSSRNSTPGSSRGTSPARMAGNGGDAALALLLLDRLNQLESKMSGKGQQQQGQTVTKKSAAEASKKPRQKRTATKAYNVTQAFGRRGPEQTQGNFGDQELIRQGTDYKHWPQIAQFAPSASAFFGMSRIGMEVTPSGTWLTYTGAIKLDDKDPNFKDQVILLNKHIDAYKTFPPTEPKKDKKKKADETQALPQRQKKQQTVTLLPAAD…	mRNA#5255_3_copies:polyA_is_-1 coordinates are BetaCoV/England/02/2020; mRNA#3842_3_copies:polyA_is_-1 coordinates are BetaCoV/England/02/2020; mRNA#6373_2_copies:polyA_is_-1 coordinates are BetaCoV/England/02/2020; mRNA#5466_3_copies:polyA_is_-1 coordinates are BetaCoV/England/02/2020; mRNA#7513_2_copies:polyA_is_-1 coordinates are BetaCoV/England/02/2020; mRNA#3612_4_copies:polyA_is_-1 coordina…
SARS2_N	2	343	355	DPNFKDQVILLNK	MSDNGPQNQRNAPRITFGGPSDSTGSNQNGERSGARSKQRRPQGLPNNTASWFTALTQHGKEDLKFPRGQGVPINTNSSPDDQIGYYRRATRRIRGGDGKMKDLSPRWYFYYLGTGPEAGLPYGANKDGIIWVATEGALNTPKDHIGTRNPANNAAIVLQLPQGTTLPKGFYAEGSRGGSQASSRSSSRSRNSSRNSTPGSSRGTSPARMAGNGGDAALALLLLDRLNQLESKMSGKGQQQQGQTVTKKSAAEASKKPRQKRTATKAYNVTQAFGRRGPEQTQGNFGDQELIRQGTDYKHWPQIAQFAPSASAFFGMSRIGMEVTPSGTWLTYTGAIKLDDKDPNFKDQVILLNKHIDAYKTFPPTEPKKDKKKKADETQALPQRQKKQQTVTLLPAAD…	mRNA#5255_3_copies:polyA_is_-1 coordinates are BetaCoV/England/02/2020; mRNA#3842_3_copies:polyA_is_-1 coordinates are BetaCoV/England/02/2020; mRNA#6373_2_copies:polyA_is_-1 coordinates are BetaCoV/England/02/2020; mRNA#5466_3_copies:polyA_is_-1 coordinates are BetaCoV/England/02/2020; mRNA#7513_2_copies:polyA_is_-1 coordinates are BetaCoV/England/02/2020; mRNA#3612_4_copies:polyA_is_-1 coordina…
SARS2_N	3	348	361	DQVILLNKHIDAYK	MSDNGPQNQRNAPRITFGGPSDSTGSNQNGERSGARSKQRRPQGLPNNTASWFTALTQHGKEDLKFPRGQGVPINTNSSPDDQIGYYRRATRRIRGGDGKMKDLSPRWYFYYLGTGPEAGLPYGANKDGIIWVATEGALNTPKDHIGTRNPANNAAIVLQLPQGTTLPKGFYAEGSRGGSQASSRSSSRSRNSSRNSTPGSSRGTSPARMAGNGGDAALALLLLDRLNQLESKMSGKGQQQQGQTVTKKSAAEASKKPRQKRTATKAYNVTQAFGRRGPEQTQGNFGDQELIRQGTDYKHWPQIAQFAPSASAFFGMSRIGMEVTPSGTWLTYTGAIKLDDKDPNFKDQVILLNKHIDAYKTFPPTEPKKDKKKKADETQALPQRQKKQQTVTLLPAAD…	mRNA#5255_3_copies:polyA_is_-1 coordinates are BetaCoV/England/02/2020; mRNA#3842_3_copies:polyA_is_-1 coordinates are BetaCoV/England/02/2020; mRNA#6373_2_copies:polyA_is_-1 coordinates are BetaCoV/England/02/2020; mRNA#5466_3_copies:polyA_is_-1 coordinates are BetaCoV/England/02/2020; mRNA#7513_2_copies:polyA_is_-1 coordinates are BetaCoV/England/02/2020; mRNA#3612_4_copies:polyA_is_-1 coordina…
SARS2_N	29	356	369	HIDAYKTFPPTEPK	MSDNGPQNQRNAPRITFGGPSDSTGSNQNGERSGARSKQRRPQGLPNNTASWFTALTQHGKEDLKFPRGQGVPINTNSSPDDQIGYYRRATRRIRGGDGKMKDLSPRWYFYYLGTGPEAGLPYGANKDGIIWVATEGALNTPKDHIGTRNPANNAAIVLQLPQGTTLPKGFYAEGSRGGSQASSRSSSRSRNSSRNSTPGSSRGTSPARMAGNGGDAALALLLLDRLNQLESKMSGKGQQQQGQTVTKKSAAEASKKPRQKRTATKAYNVTQAFGRRGPEQTQGNFGDQELIRQGTDYKHWPQIAQFAPSASAFFGMSRIGMEVTPSGTWLTYTGAIKLDDKDPNFKDQVILLNKHIDAYKTFPPTEPKKDKKKKADETQALPQRQKKQQTVTLLPAAD…	mRNA#5255_3_copies:polyA_is_-1 coordinates are BetaCoV/England/02/2020; mRNA#3842_3_copies:polyA_is_-1 coordinates are BetaCoV/England/02/2020; mRNA#6373_2_copies:polyA_is_-1 coordinates are BetaCoV/England/02/2020; mRNA#5466_3_copies:polyA_is_-1 coordinates are BetaCoV/England/02/2020; mRNA#7513_2_copies:polyA_is_-1 coordinates are BetaCoV/England/02/2020; mRNA#3612_4_copies:polyA_is_-1 coordina…
SARS2_N	191	362	369	TFPPTEPK	MSDNGPQNQRNAPRITFGGPSDSTGSNQNGERSGARSKQRRPQGLPNNTASWFTALTQHGKEDLKFPRGQGVPINTNSSPDDQIGYYRRATRRIRGGDGKMKDLSPRWYFYYLGTGPEAGLPYGANKDGIIWVATEGALNTPKDHIGTRNPANNAAIVLQLPQGTTLPKGFYAEGSRGGSQASSRSSSRSRNSSRNSTPGSSRGTSPARMAGNGGDAALALLLLDRLNQLESKMSGKGQQQQGQTVTKKSAAEASKKPRQKRTATKAYNVTQAFGRRGPEQTQGNFGDQELIRQGTDYKHWPQIAQFAPSASAFFGMSRIGMEVTPSGTWLTYTGAIKLDDKDPNFKDQVILLNKHIDAYKTFPPTEPKKDKKKKADETQALPQRQKKQQTVTLLPAAD…	mRNA#5255_3_copies:polyA_is_-1 coordinates are BetaCoV/England/02/2020; mRNA#3842_3_copies:polyA_is_-1 coordinates are BetaCoV/England/02/2020; mRNA#6373_2_copies:polyA_is_-1 coordinates are BetaCoV/England/02/2020; mRNA#5466_3_copies:polyA_is_-1 coordinates are BetaCoV/England/02/2020; mRNA#7513_2_copies:polyA_is_-1 coordinates are BetaCoV/England/02/2020; mRNA#3612_4_copies:polyA_is_-1 coordina…
SARS2_N	9	362	370	TFPPTEPKK	MSDNGPQNQRNAPRITFGGPSDSTGSNQNGERSGARSKQRRPQGLPNNTASWFTALTQHGKEDLKFPRGQGVPINTNSSPDDQIGYYRRATRRIRGGDGKMKDLSPRWYFYYLGTGPEAGLPYGANKDGIIWVATEGALNTPKDHIGTRNPANNAAIVLQLPQGTTLPKGFYAEGSRGGSQASSRSSSRSRNSSRNSTPGSSRGTSPARMAGNGGDAALALLLLDRLNQLESKMSGKGQQQQGQTVTKKSAAEASKKPRQKRTATKAYNVTQAFGRRGPEQTQGNFGDQELIRQGTDYKHWPQIAQFAPSASAFFGMSRIGMEVTPSGTWLTYTGAIKLDDKDPNFKDQVILLNKHIDAYKTFPPTEPKKDKKKKADETQALPQRQKKQQTVTLLPAAD…	mRNA#5255_3_copies:polyA_is_-1 coordinates are BetaCoV/England/02/2020; mRNA#3842_3_copies:polyA_is_-1 coordinates are BetaCoV/England/02/2020; mRNA#6373_2_copies:polyA_is_-1 coordinates are BetaCoV/England/02/2020; mRNA#5466_3_copies:polyA_is_-1 coordinates are BetaCoV/England/02/2020; mRNA#7513_2_copies:polyA_is_-1 coordinates are BetaCoV/England/02/2020; mRNA#3612_4_copies:polyA_is_-1 coordina…
SARS2_N	9	362	372	TFPPTEPKKDK	MSDNGPQNQRNAPRITFGGPSDSTGSNQNGERSGARSKQRRPQGLPNNTASWFTALTQHGKEDLKFPRGQGVPINTNSSPDDQIGYYRRATRRIRGGDGKMKDLSPRWYFYYLGTGPEAGLPYGANKDGIIWVATEGALNTPKDHIGTRNPANNAAIVLQLPQGTTLPKGFYAEGSRGGSQASSRSSSRSRNSSRNSTPGSSRGTSPARMAGNGGDAALALLLLDRLNQLESKMSGKGQQQQGQTVTKKSAAEASKKPRQKRTATKAYNVTQAFGRRGPEQTQGNFGDQELIRQGTDYKHWPQIAQFAPSASAFFGMSRIGMEVTPSGTWLTYTGAIKLDDKDPNFKDQVILLNKHIDAYKTFPPTEPKKDKKKKADETQALPQRQKKQQTVTLLPAAD…	mRNA#5255_3_copies:polyA_is_-1 coordinates are BetaCoV/England/02/2020; mRNA#3842_3_copies:polyA_is_-1 coordinates are BetaCoV/England/02/2020; mRNA#6373_2_copies:polyA_is_-1 coordinates are BetaCoV/England/02/2020; mRNA#5466_3_copies:polyA_is_-1 coordinates are BetaCoV/England/02/2020; mRNA#7513_2_copies:polyA_is_-1 coordinates are BetaCoV/England/02/2020; mRNA#3612_4_copies:polyA_is_-1 coordina…
SARS2_N	42	374	385	KKADETQALPQR	MSDNGPQNQRNAPRITFGGPSDSTGSNQNGERSGARSKQRRPQGLPNNTASWFTALTQHGKEDLKFPRGQGVPINTNSSPDDQIGYYRRATRRIRGGDGKMKDLSPRWYFYYLGTGPEAGLPYGANKDGIIWVATEGALNTPKDHIGTRNPANNAAIVLQLPQGTTLPKGFYAEGSRGGSQASSRSSSRSRNSSRNSTPGSSRGTSPARMAGNGGDAALALLLLDRLNQLESKMSGKGQQQQGQTVTKKSAAEASKKPRQKRTATKAYNVTQAFGRRGPEQTQGNFGDQELIRQGTDYKHWPQIAQFAPSASAFFGMSRIGMEVTPSGTWLTYTGAIKLDDKDPNFKDQVILLNKHIDAYKTFPPTEPKKDKKKKADETQALPQRQKKQQTVTLLPAAD…	mRNA#5255_3_copies:polyA_is_-1 coordinates are BetaCoV/England/02/2020; mRNA#3842_3_copies:polyA_is_-1 coordinates are BetaCoV/England/02/2020; mRNA#6373_2_copies:polyA_is_-1 coordinates are BetaCoV/England/02/2020; mRNA#7513_2_copies:polyA_is_-1 coordinates are BetaCoV/England/02/2020; mRNA#3612_4_copies:polyA_is_-1 coordinates are BetaCoV/England/02/2020; mRNA#3380_4_copies:polyA_is_-1 coordina…
SARS2_N	70	375	385	KADETQALPQR	MSDNGPQNQRNAPRITFGGPSDSTGSNQNGERSGARSKQRRPQGLPNNTASWFTALTQHGKEDLKFPRGQGVPINTNSSPDDQIGYYRRATRRIRGGDGKMKDLSPRWYFYYLGTGPEAGLPYGANKDGIIWVATEGALNTPKDHIGTRNPANNAAIVLQLPQGTTLPKGFYAEGSRGGSQASSRSSSRSRNSSRNSTPGSSRGTSPARMAGNGGDAALALLLLDRLNQLESKMSGKGQQQQGQTVTKKSAAEASKKPRQKRTATKAYNVTQAFGRRGPEQTQGNFGDQELIRQGTDYKHWPQIAQFAPSASAFFGMSRIGMEVTPSGTWLTYTGAIKLDDKDPNFKDQVILLNKHIDAYKTFPPTEPKKDKKKKADETQALPQRQKKQQTVTLLPAAD…	mRNA#5255_3_copies:polyA_is_-1 coordinates are BetaCoV/England/02/2020; mRNA#3842_3_copies:polyA_is_-1 coordinates are BetaCoV/England/02/2020; mRNA#6373_2_copies:polyA_is_-1 coordinates are BetaCoV/England/02/2020; mRNA#7513_2_copies:polyA_is_-1 coordinates are BetaCoV/England/02/2020; mRNA#3612_4_copies:polyA_is_-1 coordinates are BetaCoV/England/02/2020; mRNA#3380_4_copies:polyA_is_-1 coordina…
SARS2_N	1	375	387	KADETQALPQRQK	MSDNGPQNQRNAPRITFGGPSDSTGSNQNGERSGARSKQRRPQGLPNNTASWFTALTQHGKEDLKFPRGQGVPINTNSSPDDQIGYYRRATRRIRGGDGKMKDLSPRWYFYYLGTGPEAGLPYGANKDGIIWVATEGALNTPKDHIGTRNPANNAAIVLQLPQGTTLPKGFYAEGSRGGSQASSRSSSRSRNSSRNSTPGSSRGTSPARMAGNGGDAALALLLLDRLNQLESKMSGKGQQQQGQTVTKKSAAEASKKPRQKRTATKAYNVTQAFGRRGPEQTQGNFGDQELIRQGTDYKHWPQIAQFAPSASAFFGMSRIGMEVTPSGTWLTYTGAIKLDDKDPNFKDQVILLNKHIDAYKTFPPTEPKKDKKKKADETQALPQRQKKQQTVTLLPAAD…	mRNA#5255_3_copies:polyA_is_-1 coordinates are BetaCoV/England/02/2020; mRNA#3842_3_copies:polyA_is_-1 coordinates are BetaCoV/England/02/2020; mRNA#6373_2_copies:polyA_is_-1 coordinates are BetaCoV/England/02/2020; mRNA#7513_2_copies:polyA_is_-1 coordinates are BetaCoV/England/02/2020; mRNA#3612_4_copies:polyA_is_-1 coordinates are BetaCoV/England/02/2020; mRNA#3380_4_copies:polyA_is_-1 coordina…
SARS2_N	57	376	385	ADETQALPQR	MSDNGPQNQRNAPRITFGGPSDSTGSNQNGERSGARSKQRRPQGLPNNTASWFTALTQHGKEDLKFPRGQGVPINTNSSPDDQIGYYRRATRRIRGGDGKMKDLSPRWYFYYLGTGPEAGLPYGANKDGIIWVATEGALNTPKDHIGTRNPANNAAIVLQLPQGTTLPKGFYAEGSRGGSQASSRSSSRSRNSSRNSTPGSSRGTSPARMAGNGGDAALALLLLDRLNQLESKMSGKGQQQQGQTVTKKSAAEASKKPRQKRTATKAYNVTQAFGRRGPEQTQGNFGDQELIRQGTDYKHWPQIAQFAPSASAFFGMSRIGMEVTPSGTWLTYTGAIKLDDKDPNFKDQVILLNKHIDAYKTFPPTEPKKDKKKKADETQALPQRQKKQQTVTLLPAAD…	mRNA#5255_3_copies:polyA_is_-1 coordinates are BetaCoV/England/02/2020; mRNA#3842_3_copies:polyA_is_-1 coordinates are BetaCoV/England/02/2020; mRNA#6373_2_copies:polyA_is_-1 coordinates are BetaCoV/England/02/2020; mRNA#7513_2_copies:polyA_is_-1 coordinates are BetaCoV/England/02/2020; mRNA#3612_4_copies:polyA_is_-1 coordinates are BetaCoV/England/02/2020; mRNA#3380_4_copies:polyA_is_-1 coordina…
SARS2_N	1	376	387	ADETQALPQRQK	MSDNGPQNQRNAPRITFGGPSDSTGSNQNGERSGARSKQRRPQGLPNNTASWFTALTQHGKEDLKFPRGQGVPINTNSSPDDQIGYYRRATRRIRGGDGKMKDLSPRWYFYYLGTGPEAGLPYGANKDGIIWVATEGALNTPKDHIGTRNPANNAAIVLQLPQGTTLPKGFYAEGSRGGSQASSRSSSRSRNSSRNSTPGSSRGTSPARMAGNGGDAALALLLLDRLNQLESKMSGKGQQQQGQTVTKKSAAEASKKPRQKRTATKAYNVTQAFGRRGPEQTQGNFGDQELIRQGTDYKHWPQIAQFAPSASAFFGMSRIGMEVTPSGTWLTYTGAIKLDDKDPNFKDQVILLNKHIDAYKTFPPTEPKKDKKKKADETQALPQRQKKQQTVTLLPAAD…	mRNA#5255_3_copies:polyA_is_-1 coordinates are BetaCoV/England/02/2020; mRNA#3842_3_copies:polyA_is_-1 coordinates are BetaCoV/England/02/2020; mRNA#6373_2_copies:polyA_is_-1 coordinates are BetaCoV/England/02/2020; mRNA#7513_2_copies:polyA_is_-1 coordinates are BetaCoV/England/02/2020; mRNA#3612_4_copies:polyA_is_-1 coordinates are BetaCoV/England/02/2020; mRNA#3380_4_copies:polyA_is_-1 coordina…
SARS2_N	6	386	405	QKKQQTVTLLPAADLDDFSK	MSDNGPQNQRNAPRITFGGPSDSTGSNQNGERSGARSKQRRPQGLPNNTASWFTALTQHGKEDLKFPRGQGVPINTNSSPDDQIGYYRRATRRIRGGDGKMKDLSPRWYFYYLGTGPEAGLPYGANKDGIIWVATEGALNTPKDHIGTRNPANNAAIVLQLPQGTTLPKGFYAEGSRGGSQASSRSSSRSRNSSRNSTPGSSRGTSPARMAGNGGDAALALLLLDRLNQLESKMSGKGQQQQGQTVTKKSAAEASKKPRQKRTATKAYNVTQAFGRRGPEQTQGNFGDQELIRQGTDYKHWPQIAQFAPSASAFFGMSRIGMEVTPSGTWLTYTGAIKLDDKDPNFKDQVILLNKHIDAYKTFPPTEPKKDKKKKADETQALPQRQKKQQTVTLLPAAD…	mRNA#5255_3_copies:polyA_is_-1 coordinates are BetaCoV/England/02/2020; mRNA#3842_3_copies:polyA_is_-1 coordinates are BetaCoV/England/02/2020; mRNA#6373_2_copies:polyA_is_-1 coordinates are BetaCoV/England/02/2020; mRNA#5466_3_copies:polyA_is_-1 coordinates are BetaCoV/England/02/2020; mRNA#3612_4_copies:polyA_is_-1 coordinates are BetaCoV/England/02/2020; mRNA#3380_4_copies:polyA_is_-1 coordina…
SARS2_N	55	388	405	KQQTVTLLPAADLDDFSK	MSDNGPQNQRNAPRITFGGPSDSTGSNQNGERSGARSKQRRPQGLPNNTASWFTALTQHGKEDLKFPRGQGVPINTNSSPDDQIGYYRRATRRIRGGDGKMKDLSPRWYFYYLGTGPEAGLPYGANKDGIIWVATEGALNTPKDHIGTRNPANNAAIVLQLPQGTTLPKGFYAEGSRGGSQASSRSSSRSRNSSRNSTPGSSRGTSPARMAGNGGDAALALLLLDRLNQLESKMSGKGQQQQGQTVTKKSAAEASKKPRQKRTATKAYNVTQAFGRRGPEQTQGNFGDQELIRQGTDYKHWPQIAQFAPSASAFFGMSRIGMEVTPSGTWLTYTGAIKLDDKDPNFKDQVILLNKHIDAYKTFPPTEPKKDKKKKADETQALPQRQKKQQTVTLLPAAD…	mRNA#5255_3_copies:polyA_is_-1 coordinates are BetaCoV/England/02/2020; mRNA#3842_3_copies:polyA_is_-1 coordinates are BetaCoV/England/02/2020; mRNA#6373_2_copies:polyA_is_-1 coordinates are BetaCoV/England/02/2020; mRNA#5466_3_copies:polyA_is_-1 coordinates are BetaCoV/England/02/2020; mRNA#3612_4_copies:polyA_is_-1 coordinates are BetaCoV/England/02/2020; mRNA#3380_4_copies:polyA_is_-1 coordina…
SARS2_N	1	388	419	KQQTVTLLPAADLDDFSKQLQQSMSSADSTQA	MSDNGPQNQRNAPRITFGGPSDSTGSNQNGERSGARSKQRRPQGLPNNTASWFTALTQHGKEDLKFPRGQGVPINTNSSPDDQIGYYRRATRRIRGGDGKMKDLSPRWYFYYLGTGPEAGLPYGANKDGIIWVATEGALNTPKDHIGTRNPANNAAIVLQLPQGTTLPKGFYAEGSRGGSQASSRSSSRSRNSSRNSTPGSSRGTSPARMAGNGGDAALALLLLDRLNQLESKMSGKGQQQQGQTVTKKSAAEASKKPRQKRTATKAYNVTQAFGRRGPEQTQGNFGDQELIRQGTDYKHWPQIAQFAPSASAFFGMSRIGMEVTPSGTWLTYTGAIKLDDKDPNFKDQVILLNKHIDAYKTFPPTEPKKDKKKKADETQALPQRQKKQQTVTLLPAAD…	mRNA#5255_3_copies:polyA_is_-1 coordinates are BetaCoV/England/02/2020; mRNA#3842_3_copies:polyA_is_-1 coordinates are BetaCoV/England/02/2020; mRNA#6373_2_copies:polyA_is_-1 coordinates are BetaCoV/England/02/2020; mRNA#5466_3_copies:polyA_is_-1 coordinates are BetaCoV/England/02/2020; mRNA#9327_2_copies:polyA_is_-1 coordinates are BetaCoV/England/02/2020; mRNA#3612_4_copies:polyA_is_-1 coordina…
SARS2_N	112	389	405	QQTVTLLPAADLDDFSK	MSDNGPQNQRNAPRITFGGPSDSTGSNQNGERSGARSKQRRPQGLPNNTASWFTALTQHGKEDLKFPRGQGVPINTNSSPDDQIGYYRRATRRIRGGDGKMKDLSPRWYFYYLGTGPEAGLPYGANKDGIIWVATEGALNTPKDHIGTRNPANNAAIVLQLPQGTTLPKGFYAEGSRGGSQASSRSSSRSRNSSRNSTPGSSRGTSPARMAGNGGDAALALLLLDRLNQLESKMSGKGQQQQGQTVTKKSAAEASKKPRQKRTATKAYNVTQAFGRRGPEQTQGNFGDQELIRQGTDYKHWPQIAQFAPSASAFFGMSRIGMEVTPSGTWLTYTGAIKLDDKDPNFKDQVILLNKHIDAYKTFPPTEPKKDKKKKADETQALPQRQKKQQTVTLLPAAD…	mRNA#5255_3_copies:polyA_is_-1 coordinates are BetaCoV/England/02/2020; mRNA#3842_3_copies:polyA_is_-1 coordinates are BetaCoV/England/02/2020; mRNA#6373_2_copies:polyA_is_-1 coordinates are BetaCoV/England/02/2020; mRNA#5466_3_copies:polyA_is_-1 coordinates are BetaCoV/England/02/2020; mRNA#3612_4_copies:polyA_is_-1 coordinates are BetaCoV/England/02/2020; mRNA#3380_4_copies:polyA_is_-1 coordina…
SARS2_N	1	389	419	QQTVTLLPAADLDDFSKQLQQSMSSADSTQA	MSDNGPQNQRNAPRITFGGPSDSTGSNQNGERSGARSKQRRPQGLPNNTASWFTALTQHGKEDLKFPRGQGVPINTNSSPDDQIGYYRRATRRIRGGDGKMKDLSPRWYFYYLGTGPEAGLPYGANKDGIIWVATEGALNTPKDHIGTRNPANNAAIVLQLPQGTTLPKGFYAEGSRGGSQASSRSSSRSRNSSRNSTPGSSRGTSPARMAGNGGDAALALLLLDRLNQLESKMSGKGQQQQGQTVTKKSAAEASKKPRQKRTATKAYNVTQAFGRRGPEQTQGNFGDQELIRQGTDYKHWPQIAQFAPSASAFFGMSRIGMEVTPSGTWLTYTGAIKLDDKDPNFKDQVILLNKHIDAYKTFPPTEPKKDKKKKADETQALPQRQKKQQTVTLLPAAD…	mRNA#5255_3_copies:polyA_is_-1 coordinates are BetaCoV/England/02/2020; mRNA#3842_3_copies:polyA_is_-1 coordinates are BetaCoV/England/02/2020; mRNA#6373_2_copies:polyA_is_-1 coordinates are BetaCoV/England/02/2020; mRNA#5466_3_copies:polyA_is_-1 coordinates are BetaCoV/England/02/2020; mRNA#9327_2_copies:polyA_is_-1 coordinates are BetaCoV/England/02/2020; mRNA#3612_4_copies:polyA_is_-1 coordina…
SARS2_N	2	406	419	QLQQSMSSADSTQA	MSDNGPQNQRNAPRITFGGPSDSTGSNQNGERSGARSKQRRPQGLPNNTASWFTALTQHGKEDLKFPRGQGVPINTNSSPDDQIGYYRRATRRIRGGDGKMKDLSPRWYFYYLGTGPEAGLPYGANKDGIIWVATEGALNTPKDHIGTRNPANNAAIVLQLPQGTTLPKGFYAEGSRGGSQASSRSSSRSRNSSRNSTPGSSRGTSPARMAGNGGDAALALLLLDRLNQLESKMSGKGQQQQGQTVTKKSAAEASKKPRQKRTATKAYNVTQAFGRRGPEQTQGNFGDQELIRQGTDYKHWPQIAQFAPSASAFFGMSRIGMEVTPSGTWLTYTGAIKLDDKDPNFKDQVILLNKHIDAYKTFPPTEPKKDKKKKADETQALPQRQKKQQTVTLLPAAD…	mRNA#5255_3_copies:polyA_is_-1 coordinates are BetaCoV/England/02/2020; mRNA#3842_3_copies:polyA_is_-1 coordinates are BetaCoV/England/02/2020; mRNA#6373_2_copies:polyA_is_-1 coordinates are BetaCoV/England/02/2020; mRNA#5466_3_copies:polyA_is_-1 coordinates are BetaCoV/England/02/2020; mRNA#3612_4_copies:polyA_is_-1 coordinates are BetaCoV/England/02/2020; mRNA#3380_4_copies:polyA_is_-1 coordina…
SARS2_ORF_3a	39	1	6	MDLFMR	MDLFMRIFTIGTVTLKQGEIKDATPSDFVRATATIPIQASLPFGWLIVGVALLAVFQSASKIITLKKRWQLALSKGVHFVCNLLLLFVTVYSHLLLVAAGLEAPFLYLYALVYFLQSINFVRIIMRLWLCWKCRSKNPLLYDANYFLCWHTNCYDYCIPYNSVTSSIVITSGDGTTSPISEHDYQIGGYTEKWESGVKDCVVLHSYFTSDYYQLYSTQLSTDTGVEHVTFFIYNKIVDEPEEHVQIHTIDGSSGVVNPVMEPIYDEPTTTTSVPL	mRNA#17788_1_copies:polyA_is_-1 coordinates are BetaCoV/England/02/2020; mRNA#13116_1_copies:polyA_is_-1 coordinates are BetaCoV/England/02/2020; mRNA#16914_1_copies:polyA_is_-1 coordinates are BetaCoV/England/02/2020; mRNA#15630_1_copies:polyA_is_-1 coordinates are BetaCoV/England/02/2020; mRNA#24836_1_copies:polyA_is_-1 coordinates are BetaCoV/England/02/2020; mRNA#15056_1_copies:polyA_is_-1 co…
SARS2_ORF_3a	18	7	16	IFTIGTVTLK	MDLFMRIFTIGTVTLKQGEIKDATPSDFVRATATIPIQASLPFGWLIVGVALLAVFQSASKIITLKKRWQLALSKGVHFVCNLLLLFVTVYSHLLLVAAGLEAPFLYLYALVYFLQSINFVRIIMRLWLCWKCRSKNPLLYDANYFLCWHTNCYDYCIPYNSVTSSIVITSGDGTTSPISEHDYQIGGYTEKWESGVKDCVVLHSYFTSDYYQLYSTQLSTDTGVEHVTFFIYNKIVDEPEEHVQIHTIDGSSGVVNPVMEPIYDEPTTTTSVPL	mRNA#17788_1_copies:polyA_is_-1 coordinates are BetaCoV/England/02/2020; mRNA#13116_1_copies:polyA_is_-1 coordinates are BetaCoV/England/02/2020; mRNA#16914_1_copies:polyA_is_-1 coordinates are BetaCoV/England/02/2020; mRNA#15630_1_copies:polyA_is_-1 coordinates are BetaCoV/England/02/2020; mRNA#15056_1_copies:polyA_is_-1 coordinates are BetaCoV/England/02/2020; mRNA#20729_1_copies:polyA_is_-1 co…
SARS2_ORF_3a	20	17	30	QGEIKDATPSDFVR	MDLFMRIFTIGTVTLKQGEIKDATPSDFVRATATIPIQASLPFGWLIVGVALLAVFQSASKIITLKKRWQLALSKGVHFVCNLLLLFVTVYSHLLLVAAGLEAPFLYLYALVYFLQSINFVRIIMRLWLCWKCRSKNPLLYDANYFLCWHTNCYDYCIPYNSVTSSIVITSGDGTTSPISEHDYQIGGYTEKWESGVKDCVVLHSYFTSDYYQLYSTQLSTDTGVEHVTFFIYNKIVDEPEEHVQIHTIDGSSGVVNPVMEPIYDEPTTTTSVPL	mRNA#17788_1_copies:polyA_is_-1 coordinates are BetaCoV/England/02/2020; mRNA#13116_1_copies:polyA_is_-1 coordinates are BetaCoV/England/02/2020; mRNA#16914_1_copies:polyA_is_-1 coordinates are BetaCoV/England/02/2020; mRNA#15630_1_copies:polyA_is_-1 coordinates are BetaCoV/England/02/2020; mRNA#15056_1_copies:polyA_is_-1 coordinates are BetaCoV/England/02/2020; mRNA#20729_1_copies:polyA_is_-1 co…
SARS2_ORF_3a	7	22	30	DATPSDFVR	MDLFMRIFTIGTVTLKQGEIKDATPSDFVRATATIPIQASLPFGWLIVGVALLAVFQSASKIITLKKRWQLALSKGVHFVCNLLLLFVTVYSHLLLVAAGLEAPFLYLYALVYFLQSINFVRIIMRLWLCWKCRSKNPLLYDANYFLCWHTNCYDYCIPYNSVTSSIVITSGDGTTSPISEHDYQIGGYTEKWESGVKDCVVLHSYFTSDYYQLYSTQLSTDTGVEHVTFFIYNKIVDEPEEHVQIHTIDGSSGVVNPVMEPIYDEPTTTTSVPL	mRNA#17788_1_copies:polyA_is_-1 coordinates are BetaCoV/England/02/2020; mRNA#13116_1_copies:polyA_is_-1 coordinates are BetaCoV/England/02/2020; mRNA#16914_1_copies:polyA_is_-1 coordinates are BetaCoV/England/02/2020; mRNA#15630_1_copies:polyA_is_-1 coordinates are BetaCoV/England/02/2020; mRNA#15056_1_copies:polyA_is_-1 coordinates are BetaCoV/England/02/2020; mRNA#20729_1_copies:polyA_is_-1 co…
SARS2_ORF_3a	4	68	75	RWQLALSK	MDLFMRIFTIGTVTLKQGEIKDATPSDFVRATATIPIQASLPFGWLIVGVALLAVFQSASKIITLKKRWQLALSKGVHFVCNLLLLFVTVYSHLLLVAAGLEAPFLYLYALVYFLQSINFVRIIMRLWLCWKCRSKNPLLYDANYFLCWHTNCYDYCIPYNSVTSSIVITSGDGTTSPISEHDYQIGGYTEKWESGVKDCVVLHSYFTSDYYQLYSTQLSTDTGVEHVTFFIYNKIVDEPEEHVQIHTIDGSSGVVNPVMEPIYDEPTTTTSVPL	mRNA#17788_1_copies:polyA_is_-1 coordinates are BetaCoV/England/02/2020; mRNA#13116_1_copies:polyA_is_-1 coordinates are BetaCoV/England/02/2020; mRNA#16914_1_copies:polyA_is_-1 coordinates are BetaCoV/England/02/2020; mRNA#15630_1_copies:polyA_is_-1 coordinates are BetaCoV/England/02/2020; mRNA#24836_1_copies:polyA_is_-1 coordinates are BetaCoV/England/02/2020; mRNA#15056_1_copies:polyA_is_-1 co…
SARS2_ORF_3a	28	69	75	WQLALSK	MDLFMRIFTIGTVTLKQGEIKDATPSDFVRATATIPIQASLPFGWLIVGVALLAVFQSASKIITLKKRWQLALSKGVHFVCNLLLLFVTVYSHLLLVAAGLEAPFLYLYALVYFLQSINFVRIIMRLWLCWKCRSKNPLLYDANYFLCWHTNCYDYCIPYNSVTSSIVITSGDGTTSPISEHDYQIGGYTEKWESGVKDCVVLHSYFTSDYYQLYSTQLSTDTGVEHVTFFIYNKIVDEPEEHVQIHTIDGSSGVVNPVMEPIYDEPTTTTSVPL	mRNA#17788_1_copies:polyA_is_-1 coordinates are BetaCoV/England/02/2020; mRNA#13116_1_copies:polyA_is_-1 coordinates are BetaCoV/England/02/2020; mRNA#16914_1_copies:polyA_is_-1 coordinates are BetaCoV/England/02/2020; mRNA#15630_1_copies:polyA_is_-1 coordinates are BetaCoV/England/02/2020; mRNA#24836_1_copies:polyA_is_-1 coordinates are BetaCoV/England/02/2020; mRNA#15056_1_copies:polyA_is_-1 co…
SARS2_ORF_3a	16	127	132	LWLCWK	MDLFMRIFTIGTVTLKQGEIKDATPSDFVRATATIPIQASLPFGWLIVGVALLAVFQSASKIITLKKRWQLALSKGVHFVCNLLLLFVTVYSHLLLVAAGLEAPFLYLYALVYFLQSINFVRIIMRLWLCWKCRSKNPLLYDANYFLCWHTNCYDYCIPYNSVTSSIVITSGDGTTSPISEHDYQIGGYTEKWESGVKDCVVLHSYFTSDYYQLYSTQLSTDTGVEHVTFFIYNKIVDEPEEHVQIHTIDGSSGVVNPVMEPIYDEPTTTTSVPL	mRNA#37929_1_copies:polyA_is_-1 coordinates are BetaCoV/England/02/2020; mRNA#26196_1_copies:polyA_is_-1 coordinates are BetaCoV/England/02/2020; mRNA#13116_1_copies:polyA_is_-1 coordinates are BetaCoV/England/02/2020; mRNA#32297_1_copies:polyA_is_-1 coordinates are BetaCoV/England/02/2020; mRNA#31016_1_copies:polyA_is_-1 coordinates are BetaCoV/England/02/2020; mRNA#15630_1_copies:polyA_is_-1 co…
SARS2_ORF_3a	26	236	275	IVDEPEEHVQIHTIDGSSGVVNPVMEPIYDEPTTTTSVPL	MDLFMRIFTIGTVTLKQGEIKDATPSDFVRATATIPIQASLPFGWLIVGVALLAVFQSASKIITLKKRWQLALSKGVHFVCNLLLLFVTVYSHLLLVAAGLEAPFLYLYALVYFLQSINFVRIIMRLWLCWKCRSKNPLLYDANYFLCWHTNCYDYCIPYNSVTSSIVITSGDGTTSPISEHDYQIGGYTEKWESGVKDCVVLHSYFTSDYYQLYSTQLSTDTGVEHVTFFIYNKIVDEPEEHVQIHTIDGSSGVVNPVMEPIYDEPTTTTSVPL	mRNA#37929_1_copies:polyA_is_-1 coordinates are BetaCoV/England/02/2020; mRNA#71153_1_copies:polyA_is_-1 coordinates are BetaCoV/England/02/2020; mRNA#26196_1_copies:polyA_is_-1 coordinates are BetaCoV/England/02/2020; mRNA#64998_1_copies:polyA_is_-1 coordinates are BetaCoV/England/02/2020; mRNA#15630_1_copies:polyA_is_-1 coordinates are BetaCoV/England/02/2020; mRNA#73276_1_copies:polyA_is_-1 co…
SARS2_ORF_6	4	43	61	SLTENKYSQLDEEQPMEID	MFHLVDFQVTIAEILLIIMRTFKVSIWNLDYIINLIIKNLSKSLTENKYSQLDEEQPMEID	mRNA#78127_1_copies:polyA_is_-1 coordinates are BetaCoV/England/02/2020; mRNA#61421_1_copies:polyA_is_-1 coordinates are BetaCoV/England/02/2020; mRNA#41940_1_copies:polyA_is_-1 coordinates are BetaCoV/England/02/2020; mRNA#61374_1_copies:polyA_is_-1 coordinates are BetaCoV/England/02/2020; mRNA#50496_1_copies:polyA_is_-1 coordinates are BetaCoV/England/02/2020; mRNA#31783_1_copies:polyA_is_-1 co…
SARS2_ORF_6	1	49	61	YSQLDEEQPMEID	MFHLVDFQVTIAEILLIIMRTFKVSIWNLDYIINLIIKNLSKSLTENKYSQLDEEQPMEID	mRNA#53639_1_copies:polyA_is_-1 coordinates are BetaCoV/England/02/2020; mRNA#78127_1_copies:polyA_is_-1 coordinates are BetaCoV/England/02/2020; mRNA#43416_1_copies:polyA_is_-1 coordinates are BetaCoV/England/02/2020; mRNA#61421_1_copies:polyA_is_-1 coordinates are BetaCoV/England/02/2020; mRNA#41940_1_copies:polyA_is_-1 coordinates are BetaCoV/England/02/2020; mRNA#61374_1_copies:polyA_is_-1 co…
SARS2_ORF_7a	3	26	53	GTTVLLKEPCSSGTYEGNSPFHPLADNK	MKIILFLALITLATCELYHYQECVRGTTVLLKEPCSSGTYEGNSPFHPLADNKFALTCFSTQFAFACPDGVKHVYQLRARSVSPKLFIRQEEVQELYSPIFLIVAAIVFITLCFTLKRKTE	mRNA#9393_2_copies:polyA_is_-1 coordinates are BetaCoV/England/02/2020; mRNA#24486_1_copies:polyA_is_-1 coordinates are BetaCoV/England/02/2020; mRNA#13457_1_copies:polyA_is_-1 coordinates are BetaCoV/England/02/2020; mRNA#3085_4_copies:polyA_is_-1 coordinates are BetaCoV/England/02/2020; mRNA#20202_1_copies:polyA_is_-1 coordinates are BetaCoV/England/02/2020; mRNA#20515_1_copies:polyA_is_-1 coor…
SARS2_ORF_7a	12	33	53	EPCSSGTYEGNSPFHPLADNK	MKIILFLALITLATCELYHYQECVRGTTVLLKEPCSSGTYEGNSPFHPLADNKFALTCFSTQFAFACPDGVKHVYQLRARSVSPKLFIRQEEVQELYSPIFLIVAAIVFITLCFTLKRKTE	mRNA#9393_2_copies:polyA_is_-1 coordinates are BetaCoV/England/02/2020; mRNA#24486_1_copies:polyA_is_-1 coordinates are BetaCoV/England/02/2020; mRNA#13457_1_copies:polyA_is_-1 coordinates are BetaCoV/England/02/2020; mRNA#3085_4_copies:polyA_is_-1 coordinates are BetaCoV/England/02/2020; mRNA#20202_1_copies:polyA_is_-1 coordinates are BetaCoV/England/02/2020; mRNA#20515_1_copies:polyA_is_-1 coor…
SARS2_ORF_7a	7	54	72	FALTCFSTQFAFACPDGVK	MKIILFLALITLATCELYHYQECVRGTTVLLKEPCSSGTYEGNSPFHPLADNKFALTCFSTQFAFACPDGVKHVYQLRARSVSPKLFIRQEEVQELYSPIFLIVAAIVFITLCFTLKRKTE	mRNA#13457_1_copies:polyA_is_-1 coordinates are BetaCoV/England/02/2020; mRNA#3085_4_copies:polyA_is_-1 coordinates are BetaCoV/England/02/2020; mRNA#37070_1_copies:polyA_is_-1 coordinates are BetaCoV/England/02/2020; mRNA#20202_1_copies:polyA_is_-1 coordinates are BetaCoV/England/02/2020; mRNA#35865_1_copies:polyA_is_-1 coordinates are BetaCoV/England/02/2020; mRNA#24644_1_copies:polyA_is_-1 coo…
SARS2_ORF_7a	1	73	78	HVYQLR	MKIILFLALITLATCELYHYQECVRGTTVLLKEPCSSGTYEGNSPFHPLADNKFALTCFSTQFAFACPDGVKHVYQLRARSVSPKLFIRQEEVQELYSPIFLIVAAIVFITLCFTLKRKTE	mRNA#24486_1_copies:polyA_is_-1 coordinates are BetaCoV/England/02/2020; mRNA#13457_1_copies:polyA_is_-1 coordinates are BetaCoV/England/02/2020; mRNA#3085_4_copies:polyA_is_-1 coordinates are BetaCoV/England/02/2020; mRNA#37070_1_copies:polyA_is_-1 coordinates are BetaCoV/England/02/2020; mRNA#20202_1_copies:polyA_is_-1 coordinates are BetaCoV/England/02/2020; mRNA#35865_1_copies:polyA_is_-1 coo…
SARS2_ORF1a	9	12	24	THVQLSLPVLQVR	MESLVPGFNEKTHVQLSLPVLQVRDVLVRGFGDSVEEVLSEARQHLKDGTCGLVEVEKGVLPQLEQPYVFIKRSDARTAPHGHVMVELVAELEGIQYGRSGETLGVLVPHVGEIPVAYRKVLLRKNGNKGAGGHSYGADLKSFDLGDELGTDPYEDFQENWNTKHSSGVTRELMRELNGGAYTRYVDNNFCGPDGYPLECIKDLLARAGKASCTLSEQLDFIDTKRGVYCCREHEHEIAWYTERSEKSYELQTPFEIKLAKKFDTFNGECPNFVFPLNSIIKTIQPRVEKKKLDGFMGRIRSVYPVASPNECNQMCLSTLMKCDHCGETSWQTGDFVKATCEFCGTENLTKEGATTCGYLPQNAVVKIYCPACHNSEVGPEHSLAEYHNESGLKTILRK…	mRNA#51144_1_copies:polyA_is_-1 coordinates are BetaCoV/England/02/2020; mRNA#74677_1_copies:polyA_is_-1 coordinates are BetaCoV/England/02/2020; mRNA#50272_1_copies:polyA_is_-1 coordinates are BetaCoV/England/02/2020; mRNA#44803_1_copies:polyA_is_-1 coordinates are BetaCoV/England/02/2020; mRNA#29090_1_copies:polyA_is_-1 coordinates are BetaCoV/England/02/2020; mRNA#26254_1_copies:polyA_is_-1 co…
SARS2_ORF1a	10	30	43	GFGDSVEEVLSEAR	MESLVPGFNEKTHVQLSLPVLQVRDVLVRGFGDSVEEVLSEARQHLKDGTCGLVEVEKGVLPQLEQPYVFIKRSDARTAPHGHVMVELVAELEGIQYGRSGETLGVLVPHVGEIPVAYRKVLLRKNGNKGAGGHSYGADLKSFDLGDELGTDPYEDFQENWNTKHSSGVTRELMRELNGGAYTRYVDNNFCGPDGYPLECIKDLLARAGKASCTLSEQLDFIDTKRGVYCCREHEHEIAWYTERSEKSYELQTPFEIKLAKKFDTFNGECPNFVFPLNSIIKTIQPRVEKKKLDGFMGRIRSVYPVASPNECNQMCLSTLMKCDHCGETSWQTGDFVKATCEFCGTENLTKEGATTCGYLPQNAVVKIYCPACHNSEVGPEHSLAEYHNESGLKTILRK…	mRNA#51144_1_copies:polyA_is_-1 coordinates are BetaCoV/England/02/2020; mRNA#74677_1_copies:polyA_is_-1 coordinates are BetaCoV/England/02/2020; mRNA#50272_1_copies:polyA_is_-1 coordinates are BetaCoV/England/02/2020; mRNA#44803_1_copies:polyA_is_-1 coordinates are BetaCoV/England/02/2020; mRNA#29090_1_copies:polyA_is_-1 coordinates are BetaCoV/England/02/2020; mRNA#26254_1_copies:polyA_is_-1 co…
SARS2_ORF1a	1	44	58	QHLKDGTCGLVEVEK	MESLVPGFNEKTHVQLSLPVLQVRDVLVRGFGDSVEEVLSEARQHLKDGTCGLVEVEKGVLPQLEQPYVFIKRSDARTAPHGHVMVELVAELEGIQYGRSGETLGVLVPHVGEIPVAYRKVLLRKNGNKGAGGHSYGADLKSFDLGDELGTDPYEDFQENWNTKHSSGVTRELMRELNGGAYTRYVDNNFCGPDGYPLECIKDLLARAGKASCTLSEQLDFIDTKRGVYCCREHEHEIAWYTERSEKSYELQTPFEIKLAKKFDTFNGECPNFVFPLNSIIKTIQPRVEKKKLDGFMGRIRSVYPVASPNECNQMCLSTLMKCDHCGETSWQTGDFVKATCEFCGTENLTKEGATTCGYLPQNAVVKIYCPACHNSEVGPEHSLAEYHNESGLKTILRK…	mRNA#51144_1_copies:polyA_is_-1 coordinates are BetaCoV/England/02/2020; mRNA#74677_1_copies:polyA_is_-1 coordinates are BetaCoV/England/02/2020; mRNA#50272_1_copies:polyA_is_-1 coordinates are BetaCoV/England/02/2020; mRNA#44803_1_copies:polyA_is_-1 coordinates are BetaCoV/England/02/2020; mRNA#29090_1_copies:polyA_is_-1 coordinates are BetaCoV/England/02/2020; mRNA#26254_1_copies:polyA_is_-1 co…
SARS2_ORF1a	3	48	58	DGTCGLVEVEK	MESLVPGFNEKTHVQLSLPVLQVRDVLVRGFGDSVEEVLSEARQHLKDGTCGLVEVEKGVLPQLEQPYVFIKRSDARTAPHGHVMVELVAELEGIQYGRSGETLGVLVPHVGEIPVAYRKVLLRKNGNKGAGGHSYGADLKSFDLGDELGTDPYEDFQENWNTKHSSGVTRELMRELNGGAYTRYVDNNFCGPDGYPLECIKDLLARAGKASCTLSEQLDFIDTKRGVYCCREHEHEIAWYTERSEKSYELQTPFEIKLAKKFDTFNGECPNFVFPLNSIIKTIQPRVEKKKLDGFMGRIRSVYPVASPNECNQMCLSTLMKCDHCGETSWQTGDFVKATCEFCGTENLTKEGATTCGYLPQNAVVKIYCPACHNSEVGPEHSLAEYHNESGLKTILRK…	mRNA#51144_1_copies:polyA_is_-1 coordinates are BetaCoV/England/02/2020; mRNA#74677_1_copies:polyA_is_-1 coordinates are BetaCoV/England/02/2020; mRNA#50272_1_copies:polyA_is_-1 coordinates are BetaCoV/England/02/2020; mRNA#44803_1_copies:polyA_is_-1 coordinates are BetaCoV/England/02/2020; mRNA#29090_1_copies:polyA_is_-1 coordinates are BetaCoV/England/02/2020; mRNA#26254_1_copies:polyA_is_-1 co…
SARS2_ORF1a	9	59	72	GVLPQLEQPYVFIK	MESLVPGFNEKTHVQLSLPVLQVRDVLVRGFGDSVEEVLSEARQHLKDGTCGLVEVEKGVLPQLEQPYVFIKRSDARTAPHGHVMVELVAELEGIQYGRSGETLGVLVPHVGEIPVAYRKVLLRKNGNKGAGGHSYGADLKSFDLGDELGTDPYEDFQENWNTKHSSGVTRELMRELNGGAYTRYVDNNFCGPDGYPLECIKDLLARAGKASCTLSEQLDFIDTKRGVYCCREHEHEIAWYTERSEKSYELQTPFEIKLAKKFDTFNGECPNFVFPLNSIIKTIQPRVEKKKLDGFMGRIRSVYPVASPNECNQMCLSTLMKCDHCGETSWQTGDFVKATCEFCGTENLTKEGATTCGYLPQNAVVKIYCPACHNSEVGPEHSLAEYHNESGLKTILRK…	mRNA#51144_1_copies:polyA_is_-1 coordinates are BetaCoV/England/02/2020; mRNA#74677_1_copies:polyA_is_-1 coordinates are BetaCoV/England/02/2020; mRNA#50272_1_copies:polyA_is_-1 coordinates are BetaCoV/England/02/2020; mRNA#44803_1_copies:polyA_is_-1 coordinates are BetaCoV/England/02/2020; mRNA#29090_1_copies:polyA_is_-1 coordinates are BetaCoV/England/02/2020; mRNA#26254_1_copies:polyA_is_-1 co…
SARS2_ORF1a	4	59	73	GVLPQLEQPYVFIKR	MESLVPGFNEKTHVQLSLPVLQVRDVLVRGFGDSVEEVLSEARQHLKDGTCGLVEVEKGVLPQLEQPYVFIKRSDARTAPHGHVMVELVAELEGIQYGRSGETLGVLVPHVGEIPVAYRKVLLRKNGNKGAGGHSYGADLKSFDLGDELGTDPYEDFQENWNTKHSSGVTRELMRELNGGAYTRYVDNNFCGPDGYPLECIKDLLARAGKASCTLSEQLDFIDTKRGVYCCREHEHEIAWYTERSEKSYELQTPFEIKLAKKFDTFNGECPNFVFPLNSIIKTIQPRVEKKKLDGFMGRIRSVYPVASPNECNQMCLSTLMKCDHCGETSWQTGDFVKATCEFCGTENLTKEGATTCGYLPQNAVVKIYCPACHNSEVGPEHSLAEYHNESGLKTILRK…	mRNA#51144_1_copies:polyA_is_-1 coordinates are BetaCoV/England/02/2020; mRNA#74677_1_copies:polyA_is_-1 coordinates are BetaCoV/England/02/2020; mRNA#50272_1_copies:polyA_is_-1 coordinates are BetaCoV/England/02/2020; mRNA#44803_1_copies:polyA_is_-1 coordinates are BetaCoV/England/02/2020; mRNA#29090_1_copies:polyA_is_-1 coordinates are BetaCoV/England/02/2020; mRNA#26254_1_copies:polyA_is_-1 co…
SARS2_ORF1a	10	100	119	SGETLGVLVPHVGEIPVAYR	MESLVPGFNEKTHVQLSLPVLQVRDVLVRGFGDSVEEVLSEARQHLKDGTCGLVEVEKGVLPQLEQPYVFIKRSDARTAPHGHVMVELVAELEGIQYGRSGETLGVLVPHVGEIPVAYRKVLLRKNGNKGAGGHSYGADLKSFDLGDELGTDPYEDFQENWNTKHSSGVTRELMRELNGGAYTRYVDNNFCGPDGYPLECIKDLLARAGKASCTLSEQLDFIDTKRGVYCCREHEHEIAWYTERSEKSYELQTPFEIKLAKKFDTFNGECPNFVFPLNSIIKTIQPRVEKKKLDGFMGRIRSVYPVASPNECNQMCLSTLMKCDHCGETSWQTGDFVKATCEFCGTENLTKEGATTCGYLPQNAVVKIYCPACHNSEVGPEHSLAEYHNESGLKTILRK…	mRNA#51144_1_copies:polyA_is_-1 coordinates are BetaCoV/England/02/2020; mRNA#74677_1_copies:polyA_is_-1 coordinates are BetaCoV/England/02/2020; mRNA#50272_1_copies:polyA_is_-1 coordinates are BetaCoV/England/02/2020; mRNA#44803_1_copies:polyA_is_-1 coordinates are BetaCoV/England/02/2020; mRNA#29090_1_copies:polyA_is_-1 coordinates are BetaCoV/England/02/2020; mRNA#26254_1_copies:polyA_is_-1 co…
SARS2_ORF1a	7	100	120	SGETLGVLVPHVGEIPVAYRK	MESLVPGFNEKTHVQLSLPVLQVRDVLVRGFGDSVEEVLSEARQHLKDGTCGLVEVEKGVLPQLEQPYVFIKRSDARTAPHGHVMVELVAELEGIQYGRSGETLGVLVPHVGEIPVAYRKVLLRKNGNKGAGGHSYGADLKSFDLGDELGTDPYEDFQENWNTKHSSGVTRELMRELNGGAYTRYVDNNFCGPDGYPLECIKDLLARAGKASCTLSEQLDFIDTKRGVYCCREHEHEIAWYTERSEKSYELQTPFEIKLAKKFDTFNGECPNFVFPLNSIIKTIQPRVEKKKLDGFMGRIRSVYPVASPNECNQMCLSTLMKCDHCGETSWQTGDFVKATCEFCGTENLTKEGATTCGYLPQNAVVKIYCPACHNSEVGPEHSLAEYHNESGLKTILRK…	mRNA#51144_1_copies:polyA_is_-1 coordinates are BetaCoV/England/02/2020; mRNA#74677_1_copies:polyA_is_-1 coordinates are BetaCoV/England/02/2020; mRNA#50272_1_copies:polyA_is_-1 coordinates are BetaCoV/England/02/2020; mRNA#44803_1_copies:polyA_is_-1 coordinates are BetaCoV/England/02/2020; mRNA#29090_1_copies:polyA_is_-1 coordinates are BetaCoV/England/02/2020; mRNA#26254_1_copies:polyA_is_-1 co…
SARS2_ORF1a	1	126	141	NGNKGAGGHSYGADLK	MESLVPGFNEKTHVQLSLPVLQVRDVLVRGFGDSVEEVLSEARQHLKDGTCGLVEVEKGVLPQLEQPYVFIKRSDARTAPHGHVMVELVAELEGIQYGRSGETLGVLVPHVGEIPVAYRKVLLRKNGNKGAGGHSYGADLKSFDLGDELGTDPYEDFQENWNTKHSSGVTRELMRELNGGAYTRYVDNNFCGPDGYPLECIKDLLARAGKASCTLSEQLDFIDTKRGVYCCREHEHEIAWYTERSEKSYELQTPFEIKLAKKFDTFNGECPNFVFPLNSIIKTIQPRVEKKKLDGFMGRIRSVYPVASPNECNQMCLSTLMKCDHCGETSWQTGDFVKATCEFCGTENLTKEGATTCGYLPQNAVVKIYCPACHNSEVGPEHSLAEYHNESGLKTILRK…	mRNA#51144_1_copies:polyA_is_-1 coordinates are BetaCoV/England/02/2020; mRNA#74677_1_copies:polyA_is_-1 coordinates are BetaCoV/England/02/2020; mRNA#50272_1_copies:polyA_is_-1 coordinates are BetaCoV/England/02/2020; mRNA#44803_1_copies:polyA_is_-1 coordinates are BetaCoV/England/02/2020; mRNA#29090_1_copies:polyA_is_-1 coordinates are BetaCoV/England/02/2020; mRNA#26254_1_copies:polyA_is_-1 co…
SARS2_ORF1a	5	130	141	GAGGHSYGADLK	MESLVPGFNEKTHVQLSLPVLQVRDVLVRGFGDSVEEVLSEARQHLKDGTCGLVEVEKGVLPQLEQPYVFIKRSDARTAPHGHVMVELVAELEGIQYGRSGETLGVLVPHVGEIPVAYRKVLLRKNGNKGAGGHSYGADLKSFDLGDELGTDPYEDFQENWNTKHSSGVTRELMRELNGGAYTRYVDNNFCGPDGYPLECIKDLLARAGKASCTLSEQLDFIDTKRGVYCCREHEHEIAWYTERSEKSYELQTPFEIKLAKKFDTFNGECPNFVFPLNSIIKTIQPRVEKKKLDGFMGRIRSVYPVASPNECNQMCLSTLMKCDHCGETSWQTGDFVKATCEFCGTENLTKEGATTCGYLPQNAVVKIYCPACHNSEVGPEHSLAEYHNESGLKTILRK…	mRNA#51144_1_copies:polyA_is_-1 coordinates are BetaCoV/England/02/2020; mRNA#74677_1_copies:polyA_is_-1 coordinates are BetaCoV/England/02/2020; mRNA#50272_1_copies:polyA_is_-1 coordinates are BetaCoV/England/02/2020; mRNA#44803_1_copies:polyA_is_-1 coordinates are BetaCoV/England/02/2020; mRNA#29090_1_copies:polyA_is_-1 coordinates are BetaCoV/England/02/2020; mRNA#26254_1_copies:polyA_is_-1 co…
SARS2_ORF1a	4	185	202	YVDNNFCGPDGYPLECIK	MESLVPGFNEKTHVQLSLPVLQVRDVLVRGFGDSVEEVLSEARQHLKDGTCGLVEVEKGVLPQLEQPYVFIKRSDARTAPHGHVMVELVAELEGIQYGRSGETLGVLVPHVGEIPVAYRKVLLRKNGNKGAGGHSYGADLKSFDLGDELGTDPYEDFQENWNTKHSSGVTRELMRELNGGAYTRYVDNNFCGPDGYPLECIKDLLARAGKASCTLSEQLDFIDTKRGVYCCREHEHEIAWYTERSEKSYELQTPFEIKLAKKFDTFNGECPNFVFPLNSIIKTIQPRVEKKKLDGFMGRIRSVYPVASPNECNQMCLSTLMKCDHCGETSWQTGDFVKATCEFCGTENLTKEGATTCGYLPQNAVVKIYCPACHNSEVGPEHSLAEYHNESGLKTILRK…	mRNA#51144_1_copies:polyA_is_-1 coordinates are BetaCoV/England/02/2020; mRNA#74677_1_copies:polyA_is_-1 coordinates are BetaCoV/England/02/2020; mRNA#13684_1_copies:polyA_is_-1 coordinates are BetaCoV/England/02/2020; mRNA#50272_1_copies:polyA_is_-1 coordinates are BetaCoV/England/02/2020; mRNA#44803_1_copies:polyA_is_-1 coordinates are BetaCoV/England/02/2020; mRNA#29090_1_copies:polyA_is_-1 co…
SARS2_ORF1a	8	185	207	YVDNNFCGPDGYPLECIKDLLAR	MESLVPGFNEKTHVQLSLPVLQVRDVLVRGFGDSVEEVLSEARQHLKDGTCGLVEVEKGVLPQLEQPYVFIKRSDARTAPHGHVMVELVAELEGIQYGRSGETLGVLVPHVGEIPVAYRKVLLRKNGNKGAGGHSYGADLKSFDLGDELGTDPYEDFQENWNTKHSSGVTRELMRELNGGAYTRYVDNNFCGPDGYPLECIKDLLARAGKASCTLSEQLDFIDTKRGVYCCREHEHEIAWYTERSEKSYELQTPFEIKLAKKFDTFNGECPNFVFPLNSIIKTIQPRVEKKKLDGFMGRIRSVYPVASPNECNQMCLSTLMKCDHCGETSWQTGDFVKATCEFCGTENLTKEGATTCGYLPQNAVVKIYCPACHNSEVGPEHSLAEYHNESGLKTILRK…	mRNA#51144_1_copies:polyA_is_-1 coordinates are BetaCoV/England/02/2020; mRNA#74677_1_copies:polyA_is_-1 coordinates are BetaCoV/England/02/2020; mRNA#13684_1_copies:polyA_is_-1 coordinates are BetaCoV/England/02/2020; mRNA#50272_1_copies:polyA_is_-1 coordinates are BetaCoV/England/02/2020; mRNA#44803_1_copies:polyA_is_-1 coordinates are BetaCoV/England/02/2020; mRNA#29090_1_copies:polyA_is_-1 co…
SARS2_ORF1a	4	211	225	ASCTLSEQLDFIDTK	MESLVPGFNEKTHVQLSLPVLQVRDVLVRGFGDSVEEVLSEARQHLKDGTCGLVEVEKGVLPQLEQPYVFIKRSDARTAPHGHVMVELVAELEGIQYGRSGETLGVLVPHVGEIPVAYRKVLLRKNGNKGAGGHSYGADLKSFDLGDELGTDPYEDFQENWNTKHSSGVTRELMRELNGGAYTRYVDNNFCGPDGYPLECIKDLLARAGKASCTLSEQLDFIDTKRGVYCCREHEHEIAWYTERSEKSYELQTPFEIKLAKKFDTFNGECPNFVFPLNSIIKTIQPRVEKKKLDGFMGRIRSVYPVASPNECNQMCLSTLMKCDHCGETSWQTGDFVKATCEFCGTENLTKEGATTCGYLPQNAVVKIYCPACHNSEVGPEHSLAEYHNESGLKTILRK…	mRNA#51144_1_copies:polyA_is_-1 coordinates are BetaCoV/England/02/2020; mRNA#74677_1_copies:polyA_is_-1 coordinates are BetaCoV/England/02/2020; mRNA#13684_1_copies:polyA_is_-1 coordinates are BetaCoV/England/02/2020; mRNA#50272_1_copies:polyA_is_-1 coordinates are BetaCoV/England/02/2020; mRNA#44803_1_copies:polyA_is_-1 coordinates are BetaCoV/England/02/2020; mRNA#29090_1_copies:polyA_is_-1 co…
SARS2_ORF1a	12	211	226	ASCTLSEQLDFIDTKR	MESLVPGFNEKTHVQLSLPVLQVRDVLVRGFGDSVEEVLSEARQHLKDGTCGLVEVEKGVLPQLEQPYVFIKRSDARTAPHGHVMVELVAELEGIQYGRSGETLGVLVPHVGEIPVAYRKVLLRKNGNKGAGGHSYGADLKSFDLGDELGTDPYEDFQENWNTKHSSGVTRELMRELNGGAYTRYVDNNFCGPDGYPLECIKDLLARAGKASCTLSEQLDFIDTKRGVYCCREHEHEIAWYTERSEKSYELQTPFEIKLAKKFDTFNGECPNFVFPLNSIIKTIQPRVEKKKLDGFMGRIRSVYPVASPNECNQMCLSTLMKCDHCGETSWQTGDFVKATCEFCGTENLTKEGATTCGYLPQNAVVKIYCPACHNSEVGPEHSLAEYHNESGLKTILRK…	mRNA#51144_1_copies:polyA_is_-1 coordinates are BetaCoV/England/02/2020; mRNA#74677_1_copies:polyA_is_-1 coordinates are BetaCoV/England/02/2020; mRNA#13684_1_copies:polyA_is_-1 coordinates are BetaCoV/England/02/2020; mRNA#50272_1_copies:polyA_is_-1 coordinates are BetaCoV/England/02/2020; mRNA#44803_1_copies:polyA_is_-1 coordinates are BetaCoV/England/02/2020; mRNA#29090_1_copies:polyA_is_-1 co…
SARS2_ORF1a	10	233	244	EHEHEIAWYTER	MESLVPGFNEKTHVQLSLPVLQVRDVLVRGFGDSVEEVLSEARQHLKDGTCGLVEVEKGVLPQLEQPYVFIKRSDARTAPHGHVMVELVAELEGIQYGRSGETLGVLVPHVGEIPVAYRKVLLRKNGNKGAGGHSYGADLKSFDLGDELGTDPYEDFQENWNTKHSSGVTRELMRELNGGAYTRYVDNNFCGPDGYPLECIKDLLARAGKASCTLSEQLDFIDTKRGVYCCREHEHEIAWYTERSEKSYELQTPFEIKLAKKFDTFNGECPNFVFPLNSIIKTIQPRVEKKKLDGFMGRIRSVYPVASPNECNQMCLSTLMKCDHCGETSWQTGDFVKATCEFCGTENLTKEGATTCGYLPQNAVVKIYCPACHNSEVGPEHSLAEYHNESGLKTILRK…	mRNA#51144_1_copies:polyA_is_-1 coordinates are BetaCoV/England/02/2020; mRNA#74677_1_copies:polyA_is_-1 coordinates are BetaCoV/England/02/2020; mRNA#13684_1_copies:polyA_is_-1 coordinates are BetaCoV/England/02/2020; mRNA#50272_1_copies:polyA_is_-1 coordinates are BetaCoV/England/02/2020; mRNA#44803_1_copies:polyA_is_-1 coordinates are BetaCoV/England/02/2020; mRNA#29090_1_copies:polyA_is_-1 co…
SARS2_ORF1a	17	248	258	SYELQTPFEIK	MESLVPGFNEKTHVQLSLPVLQVRDVLVRGFGDSVEEVLSEARQHLKDGTCGLVEVEKGVLPQLEQPYVFIKRSDARTAPHGHVMVELVAELEGIQYGRSGETLGVLVPHVGEIPVAYRKVLLRKNGNKGAGGHSYGADLKSFDLGDELGTDPYEDFQENWNTKHSSGVTRELMRELNGGAYTRYVDNNFCGPDGYPLECIKDLLARAGKASCTLSEQLDFIDTKRGVYCCREHEHEIAWYTERSEKSYELQTPFEIKLAKKFDTFNGECPNFVFPLNSIIKTIQPRVEKKKLDGFMGRIRSVYPVASPNECNQMCLSTLMKCDHCGETSWQTGDFVKATCEFCGTENLTKEGATTCGYLPQNAVVKIYCPACHNSEVGPEHSLAEYHNESGLKTILRK…	mRNA#51144_1_copies:polyA_is_-1 coordinates are BetaCoV/England/02/2020; mRNA#74677_1_copies:polyA_is_-1 coordinates are BetaCoV/England/02/2020; mRNA#13684_1_copies:polyA_is_-1 coordinates are BetaCoV/England/02/2020; mRNA#50272_1_copies:polyA_is_-1 coordinates are BetaCoV/England/02/2020; mRNA#44803_1_copies:polyA_is_-1 coordinates are BetaCoV/England/02/2020; mRNA#29090_1_copies:polyA_is_-1 co…
SARS2_ORF1a	12	262	282	KFDTFNGECPNFVFPLNSIIK	MESLVPGFNEKTHVQLSLPVLQVRDVLVRGFGDSVEEVLSEARQHLKDGTCGLVEVEKGVLPQLEQPYVFIKRSDARTAPHGHVMVELVAELEGIQYGRSGETLGVLVPHVGEIPVAYRKVLLRKNGNKGAGGHSYGADLKSFDLGDELGTDPYEDFQENWNTKHSSGVTRELMRELNGGAYTRYVDNNFCGPDGYPLECIKDLLARAGKASCTLSEQLDFIDTKRGVYCCREHEHEIAWYTERSEKSYELQTPFEIKLAKKFDTFNGECPNFVFPLNSIIKTIQPRVEKKKLDGFMGRIRSVYPVASPNECNQMCLSTLMKCDHCGETSWQTGDFVKATCEFCGTENLTKEGATTCGYLPQNAVVKIYCPACHNSEVGPEHSLAEYHNESGLKTILRK…	mRNA#51144_1_copies:polyA_is_-1 coordinates are BetaCoV/England/02/2020; mRNA#74677_1_copies:polyA_is_-1 coordinates are BetaCoV/England/02/2020; mRNA#13684_1_copies:polyA_is_-1 coordinates are BetaCoV/England/02/2020; mRNA#50272_1_copies:polyA_is_-1 coordinates are BetaCoV/England/02/2020; mRNA#44803_1_copies:polyA_is_-1 coordinates are BetaCoV/England/02/2020; mRNA#26254_1_copies:polyA_is_-1 co…
SARS2_ORF1a	6	263	282	FDTFNGECPNFVFPLNSIIK	MESLVPGFNEKTHVQLSLPVLQVRDVLVRGFGDSVEEVLSEARQHLKDGTCGLVEVEKGVLPQLEQPYVFIKRSDARTAPHGHVMVELVAELEGIQYGRSGETLGVLVPHVGEIPVAYRKVLLRKNGNKGAGGHSYGADLKSFDLGDELGTDPYEDFQENWNTKHSSGVTRELMRELNGGAYTRYVDNNFCGPDGYPLECIKDLLARAGKASCTLSEQLDFIDTKRGVYCCREHEHEIAWYTERSEKSYELQTPFEIKLAKKFDTFNGECPNFVFPLNSIIKTIQPRVEKKKLDGFMGRIRSVYPVASPNECNQMCLSTLMKCDHCGETSWQTGDFVKATCEFCGTENLTKEGATTCGYLPQNAVVKIYCPACHNSEVGPEHSLAEYHNESGLKTILRK…	mRNA#51144_1_copies:polyA_is_-1 coordinates are BetaCoV/England/02/2020; mRNA#74677_1_copies:polyA_is_-1 coordinates are BetaCoV/England/02/2020; mRNA#13684_1_copies:polyA_is_-1 coordinates are BetaCoV/England/02/2020; mRNA#50272_1_copies:polyA_is_-1 coordinates are BetaCoV/England/02/2020; mRNA#44803_1_copies:polyA_is_-1 coordinates are BetaCoV/England/02/2020; mRNA#26254_1_copies:polyA_is_-1 co…
SARS2_ORF1a	1	292	299	KLDGFMGR	MESLVPGFNEKTHVQLSLPVLQVRDVLVRGFGDSVEEVLSEARQHLKDGTCGLVEVEKGVLPQLEQPYVFIKRSDARTAPHGHVMVELVAELEGIQYGRSGETLGVLVPHVGEIPVAYRKVLLRKNGNKGAGGHSYGADLKSFDLGDELGTDPYEDFQENWNTKHSSGVTRELMRELNGGAYTRYVDNNFCGPDGYPLECIKDLLARAGKASCTLSEQLDFIDTKRGVYCCREHEHEIAWYTERSEKSYELQTPFEIKLAKKFDTFNGECPNFVFPLNSIIKTIQPRVEKKKLDGFMGRIRSVYPVASPNECNQMCLSTLMKCDHCGETSWQTGDFVKATCEFCGTENLTKEGATTCGYLPQNAVVKIYCPACHNSEVGPEHSLAEYHNESGLKTILRK…	mRNA#51144_1_copies:polyA_is_-1 coordinates are BetaCoV/England/02/2020; mRNA#13684_1_copies:polyA_is_-1 coordinates are BetaCoV/England/02/2020; mRNA#50272_1_copies:polyA_is_-1 coordinates are BetaCoV/England/02/2020; mRNA#44803_1_copies:polyA_is_-1 coordinates are BetaCoV/England/02/2020; mRNA#26254_1_copies:polyA_is_-1 coordinates are BetaCoV/England/02/2020; mRNA#68084_1_copies:polyA_is_-1 co…
SARS2_ORF1a	4	293	299	LDGFMGR	MESLVPGFNEKTHVQLSLPVLQVRDVLVRGFGDSVEEVLSEARQHLKDGTCGLVEVEKGVLPQLEQPYVFIKRSDARTAPHGHVMVELVAELEGIQYGRSGETLGVLVPHVGEIPVAYRKVLLRKNGNKGAGGHSYGADLKSFDLGDELGTDPYEDFQENWNTKHSSGVTRELMRELNGGAYTRYVDNNFCGPDGYPLECIKDLLARAGKASCTLSEQLDFIDTKRGVYCCREHEHEIAWYTERSEKSYELQTPFEIKLAKKFDTFNGECPNFVFPLNSIIKTIQPRVEKKKLDGFMGRIRSVYPVASPNECNQMCLSTLMKCDHCGETSWQTGDFVKATCEFCGTENLTKEGATTCGYLPQNAVVKIYCPACHNSEVGPEHSLAEYHNESGLKTILRK…	mRNA#51144_1_copies:polyA_is_-1 coordinates are BetaCoV/England/02/2020; mRNA#13684_1_copies:polyA_is_-1 coordinates are BetaCoV/England/02/2020; mRNA#50272_1_copies:polyA_is_-1 coordinates are BetaCoV/England/02/2020; mRNA#44803_1_copies:polyA_is_-1 coordinates are BetaCoV/England/02/2020; mRNA#26254_1_copies:polyA_is_-1 coordinates are BetaCoV/England/02/2020; mRNA#68084_1_copies:polyA_is_-1 co…
SARS2_ORF1a	6	302	322	SVYPVASPNECNQMCLSTLMK	MESLVPGFNEKTHVQLSLPVLQVRDVLVRGFGDSVEEVLSEARQHLKDGTCGLVEVEKGVLPQLEQPYVFIKRSDARTAPHGHVMVELVAELEGIQYGRSGETLGVLVPHVGEIPVAYRKVLLRKNGNKGAGGHSYGADLKSFDLGDELGTDPYEDFQENWNTKHSSGVTRELMRELNGGAYTRYVDNNFCGPDGYPLECIKDLLARAGKASCTLSEQLDFIDTKRGVYCCREHEHEIAWYTERSEKSYELQTPFEIKLAKKFDTFNGECPNFVFPLNSIIKTIQPRVEKKKLDGFMGRIRSVYPVASPNECNQMCLSTLMKCDHCGETSWQTGDFVKATCEFCGTENLTKEGATTCGYLPQNAVVKIYCPACHNSEVGPEHSLAEYHNESGLKTILRK…	mRNA#51144_1_copies:polyA_is_-1 coordinates are BetaCoV/England/02/2020; mRNA#74677_1_copies:polyA_is_-1 coordinates are BetaCoV/England/02/2020; mRNA#13684_1_copies:polyA_is_-1 coordinates are BetaCoV/England/02/2020; mRNA#50272_1_copies:polyA_is_-1 coordinates are BetaCoV/England/02/2020; mRNA#44803_1_copies:polyA_is_-1 coordinates are BetaCoV/England/02/2020; mRNA#26254_1_copies:polyA_is_-1 co…
SARS2_ORF1a	4	323	338	CDHCGETSWQTGDFVK	MESLVPGFNEKTHVQLSLPVLQVRDVLVRGFGDSVEEVLSEARQHLKDGTCGLVEVEKGVLPQLEQPYVFIKRSDARTAPHGHVMVELVAELEGIQYGRSGETLGVLVPHVGEIPVAYRKVLLRKNGNKGAGGHSYGADLKSFDLGDELGTDPYEDFQENWNTKHSSGVTRELMRELNGGAYTRYVDNNFCGPDGYPLECIKDLLARAGKASCTLSEQLDFIDTKRGVYCCREHEHEIAWYTERSEKSYELQTPFEIKLAKKFDTFNGECPNFVFPLNSIIKTIQPRVEKKKLDGFMGRIRSVYPVASPNECNQMCLSTLMKCDHCGETSWQTGDFVKATCEFCGTENLTKEGATTCGYLPQNAVVKIYCPACHNSEVGPEHSLAEYHNESGLKTILRK…	mRNA#51144_1_copies:polyA_is_-1 coordinates are BetaCoV/England/02/2020; mRNA#74677_1_copies:polyA_is_-1 coordinates are BetaCoV/England/02/2020; mRNA#13684_1_copies:polyA_is_-1 coordinates are BetaCoV/England/02/2020; mRNA#50272_1_copies:polyA_is_-1 coordinates are BetaCoV/England/02/2020; mRNA#44803_1_copies:polyA_is_-1 coordinates are BetaCoV/England/02/2020; mRNA#26254_1_copies:polyA_is_-1 co…
SARS2_ORF1a	13	339	351	ATCEFCGTENLTK	MESLVPGFNEKTHVQLSLPVLQVRDVLVRGFGDSVEEVLSEARQHLKDGTCGLVEVEKGVLPQLEQPYVFIKRSDARTAPHGHVMVELVAELEGIQYGRSGETLGVLVPHVGEIPVAYRKVLLRKNGNKGAGGHSYGADLKSFDLGDELGTDPYEDFQENWNTKHSSGVTRELMRELNGGAYTRYVDNNFCGPDGYPLECIKDLLARAGKASCTLSEQLDFIDTKRGVYCCREHEHEIAWYTERSEKSYELQTPFEIKLAKKFDTFNGECPNFVFPLNSIIKTIQPRVEKKKLDGFMGRIRSVYPVASPNECNQMCLSTLMKCDHCGETSWQTGDFVKATCEFCGTENLTKEGATTCGYLPQNAVVKIYCPACHNSEVGPEHSLAEYHNESGLKTILRK…	mRNA#51144_1_copies:polyA_is_-1 coordinates are BetaCoV/England/02/2020; mRNA#74677_1_copies:polyA_is_-1 coordinates are BetaCoV/England/02/2020; mRNA#13684_1_copies:polyA_is_-1 coordinates are BetaCoV/England/02/2020; mRNA#50272_1_copies:polyA_is_-1 coordinates are BetaCoV/England/02/2020; mRNA#44803_1_copies:polyA_is_-1 coordinates are BetaCoV/England/02/2020; mRNA#26254_1_copies:polyA_is_-1 co…
SARS2_ORF1a	6	352	367	EGATTCGYLPQNAVVK	MESLVPGFNEKTHVQLSLPVLQVRDVLVRGFGDSVEEVLSEARQHLKDGTCGLVEVEKGVLPQLEQPYVFIKRSDARTAPHGHVMVELVAELEGIQYGRSGETLGVLVPHVGEIPVAYRKVLLRKNGNKGAGGHSYGADLKSFDLGDELGTDPYEDFQENWNTKHSSGVTRELMRELNGGAYTRYVDNNFCGPDGYPLECIKDLLARAGKASCTLSEQLDFIDTKRGVYCCREHEHEIAWYTERSEKSYELQTPFEIKLAKKFDTFNGECPNFVFPLNSIIKTIQPRVEKKKLDGFMGRIRSVYPVASPNECNQMCLSTLMKCDHCGETSWQTGDFVKATCEFCGTENLTKEGATTCGYLPQNAVVKIYCPACHNSEVGPEHSLAEYHNESGLKTILRK…	mRNA#51144_1_copies:polyA_is_-1 coordinates are BetaCoV/England/02/2020; mRNA#13684_1_copies:polyA_is_-1 coordinates are BetaCoV/England/02/2020; mRNA#50272_1_copies:polyA_is_-1 coordinates are BetaCoV/England/02/2020; mRNA#44803_1_copies:polyA_is_-1 coordinates are BetaCoV/England/02/2020; mRNA#26254_1_copies:polyA_is_-1 coordinates are BetaCoV/England/02/2020; mRNA#68084_1_copies:polyA_is_-1 co…
SARS2_ORF1a	5	368	394	IYCPACHNSEVGPEHSLAEYHNESGLK	MESLVPGFNEKTHVQLSLPVLQVRDVLVRGFGDSVEEVLSEARQHLKDGTCGLVEVEKGVLPQLEQPYVFIKRSDARTAPHGHVMVELVAELEGIQYGRSGETLGVLVPHVGEIPVAYRKVLLRKNGNKGAGGHSYGADLKSFDLGDELGTDPYEDFQENWNTKHSSGVTRELMRELNGGAYTRYVDNNFCGPDGYPLECIKDLLARAGKASCTLSEQLDFIDTKRGVYCCREHEHEIAWYTERSEKSYELQTPFEIKLAKKFDTFNGECPNFVFPLNSIIKTIQPRVEKKKLDGFMGRIRSVYPVASPNECNQMCLSTLMKCDHCGETSWQTGDFVKATCEFCGTENLTKEGATTCGYLPQNAVVKIYCPACHNSEVGPEHSLAEYHNESGLKTILRK…	mRNA#51144_1_copies:polyA_is_-1 coordinates are BetaCoV/England/02/2020; mRNA#13684_1_copies:polyA_is_-1 coordinates are BetaCoV/England/02/2020; mRNA#50272_1_copies:polyA_is_-1 coordinates are BetaCoV/England/02/2020; mRNA#44803_1_copies:polyA_is_-1 coordinates are BetaCoV/England/02/2020; mRNA#26254_1_copies:polyA_is_-1 coordinates are BetaCoV/England/02/2020; mRNA#68084_1_copies:polyA_is_-1 co…
SARS2_ORF1a	7	403	419	TIAFGGCVFSYVGCHNK	MESLVPGFNEKTHVQLSLPVLQVRDVLVRGFGDSVEEVLSEARQHLKDGTCGLVEVEKGVLPQLEQPYVFIKRSDARTAPHGHVMVELVAELEGIQYGRSGETLGVLVPHVGEIPVAYRKVLLRKNGNKGAGGHSYGADLKSFDLGDELGTDPYEDFQENWNTKHSSGVTRELMRELNGGAYTRYVDNNFCGPDGYPLECIKDLLARAGKASCTLSEQLDFIDTKRGVYCCREHEHEIAWYTERSEKSYELQTPFEIKLAKKFDTFNGECPNFVFPLNSIIKTIQPRVEKKKLDGFMGRIRSVYPVASPNECNQMCLSTLMKCDHCGETSWQTGDFVKATCEFCGTENLTKEGATTCGYLPQNAVVKIYCPACHNSEVGPEHSLAEYHNESGLKTILRK…	mRNA#51144_1_copies:polyA_is_-1 coordinates are BetaCoV/England/02/2020; mRNA#13684_1_copies:polyA_is_-1 coordinates are BetaCoV/England/02/2020; mRNA#50272_1_copies:polyA_is_-1 coordinates are BetaCoV/England/02/2020; mRNA#44803_1_copies:polyA_is_-1 coordinates are BetaCoV/England/02/2020; mRNA#26254_1_copies:polyA_is_-1 coordinates are BetaCoV/England/02/2020; mRNA#68084_1_copies:polyA_is_-1 co…
SARS2_ORF1a	6	420	426	CAYWVPR	MESLVPGFNEKTHVQLSLPVLQVRDVLVRGFGDSVEEVLSEARQHLKDGTCGLVEVEKGVLPQLEQPYVFIKRSDARTAPHGHVMVELVAELEGIQYGRSGETLGVLVPHVGEIPVAYRKVLLRKNGNKGAGGHSYGADLKSFDLGDELGTDPYEDFQENWNTKHSSGVTRELMRELNGGAYTRYVDNNFCGPDGYPLECIKDLLARAGKASCTLSEQLDFIDTKRGVYCCREHEHEIAWYTERSEKSYELQTPFEIKLAKKFDTFNGECPNFVFPLNSIIKTIQPRVEKKKLDGFMGRIRSVYPVASPNECNQMCLSTLMKCDHCGETSWQTGDFVKATCEFCGTENLTKEGATTCGYLPQNAVVKIYCPACHNSEVGPEHSLAEYHNESGLKTILRK…	mRNA#51144_1_copies:polyA_is_-1 coordinates are BetaCoV/England/02/2020; mRNA#13684_1_copies:polyA_is_-1 coordinates are BetaCoV/England/02/2020; mRNA#50272_1_copies:polyA_is_-1 coordinates are BetaCoV/England/02/2020; mRNA#44803_1_copies:polyA_is_-1 coordinates are BetaCoV/England/02/2020; mRNA#26254_1_copies:polyA_is_-1 coordinates are BetaCoV/England/02/2020; mRNA#68084_1_copies:polyA_is_-1 co…
SARS2_ORF1a	7	427	456	ASANIGCNHTGVVGEGSEGLNDNLLEILQK	MESLVPGFNEKTHVQLSLPVLQVRDVLVRGFGDSVEEVLSEARQHLKDGTCGLVEVEKGVLPQLEQPYVFIKRSDARTAPHGHVMVELVAELEGIQYGRSGETLGVLVPHVGEIPVAYRKVLLRKNGNKGAGGHSYGADLKSFDLGDELGTDPYEDFQENWNTKHSSGVTRELMRELNGGAYTRYVDNNFCGPDGYPLECIKDLLARAGKASCTLSEQLDFIDTKRGVYCCREHEHEIAWYTERSEKSYELQTPFEIKLAKKFDTFNGECPNFVFPLNSIIKTIQPRVEKKKLDGFMGRIRSVYPVASPNECNQMCLSTLMKCDHCGETSWQTGDFVKATCEFCGTENLTKEGATTCGYLPQNAVVKIYCPACHNSEVGPEHSLAEYHNESGLKTILRK…	mRNA#51144_1_copies:polyA_is_-1 coordinates are BetaCoV/England/02/2020; mRNA#13684_1_copies:polyA_is_-1 coordinates are BetaCoV/England/02/2020; mRNA#50272_1_copies:polyA_is_-1 coordinates are BetaCoV/England/02/2020; mRNA#44803_1_copies:polyA_is_-1 coordinates are BetaCoV/England/02/2020; mRNA#26254_1_copies:polyA_is_-1 coordinates are BetaCoV/England/02/2020; mRNA#68084_1_copies:polyA_is_-1 co…
SARS2_ORF1a	2	457	468	EKVNINIVGDFK	MESLVPGFNEKTHVQLSLPVLQVRDVLVRGFGDSVEEVLSEARQHLKDGTCGLVEVEKGVLPQLEQPYVFIKRSDARTAPHGHVMVELVAELEGIQYGRSGETLGVLVPHVGEIPVAYRKVLLRKNGNKGAGGHSYGADLKSFDLGDELGTDPYEDFQENWNTKHSSGVTRELMRELNGGAYTRYVDNNFCGPDGYPLECIKDLLARAGKASCTLSEQLDFIDTKRGVYCCREHEHEIAWYTERSEKSYELQTPFEIKLAKKFDTFNGECPNFVFPLNSIIKTIQPRVEKKKLDGFMGRIRSVYPVASPNECNQMCLSTLMKCDHCGETSWQTGDFVKATCEFCGTENLTKEGATTCGYLPQNAVVKIYCPACHNSEVGPEHSLAEYHNESGLKTILRK…	mRNA#51144_1_copies:polyA_is_-1 coordinates are BetaCoV/England/02/2020; mRNA#13684_1_copies:polyA_is_-1 coordinates are BetaCoV/England/02/2020; mRNA#50272_1_copies:polyA_is_-1 coordinates are BetaCoV/England/02/2020; mRNA#44803_1_copies:polyA_is_-1 coordinates are BetaCoV/England/02/2020; mRNA#26254_1_copies:polyA_is_-1 coordinates are BetaCoV/England/02/2020; mRNA#68084_1_copies:polyA_is_-1 co…
SARS2_ORF1a	5	459	468	VNINIVGDFK	MESLVPGFNEKTHVQLSLPVLQVRDVLVRGFGDSVEEVLSEARQHLKDGTCGLVEVEKGVLPQLEQPYVFIKRSDARTAPHGHVMVELVAELEGIQYGRSGETLGVLVPHVGEIPVAYRKVLLRKNGNKGAGGHSYGADLKSFDLGDELGTDPYEDFQENWNTKHSSGVTRELMRELNGGAYTRYVDNNFCGPDGYPLECIKDLLARAGKASCTLSEQLDFIDTKRGVYCCREHEHEIAWYTERSEKSYELQTPFEIKLAKKFDTFNGECPNFVFPLNSIIKTIQPRVEKKKLDGFMGRIRSVYPVASPNECNQMCLSTLMKCDHCGETSWQTGDFVKATCEFCGTENLTKEGATTCGYLPQNAVVKIYCPACHNSEVGPEHSLAEYHNESGLKTILRK…	mRNA#51144_1_copies:polyA_is_-1 coordinates are BetaCoV/England/02/2020; mRNA#13684_1_copies:polyA_is_-1 coordinates are BetaCoV/England/02/2020; mRNA#50272_1_copies:polyA_is_-1 coordinates are BetaCoV/England/02/2020; mRNA#44803_1_copies:polyA_is_-1 coordinates are BetaCoV/England/02/2020; mRNA#26254_1_copies:polyA_is_-1 coordinates are BetaCoV/England/02/2020; mRNA#68084_1_copies:polyA_is_-1 co…
SARS2_ORF1a	12	501	510	QIVESCGNFK	MESLVPGFNEKTHVQLSLPVLQVRDVLVRGFGDSVEEVLSEARQHLKDGTCGLVEVEKGVLPQLEQPYVFIKRSDARTAPHGHVMVELVAELEGIQYGRSGETLGVLVPHVGEIPVAYRKVLLRKNGNKGAGGHSYGADLKSFDLGDELGTDPYEDFQENWNTKHSSGVTRELMRELNGGAYTRYVDNNFCGPDGYPLECIKDLLARAGKASCTLSEQLDFIDTKRGVYCCREHEHEIAWYTERSEKSYELQTPFEIKLAKKFDTFNGECPNFVFPLNSIIKTIQPRVEKKKLDGFMGRIRSVYPVASPNECNQMCLSTLMKCDHCGETSWQTGDFVKATCEFCGTENLTKEGATTCGYLPQNAVVKIYCPACHNSEVGPEHSLAEYHNESGLKTILRK…	mRNA#51144_1_copies:polyA_is_-1 coordinates are BetaCoV/England/02/2020; mRNA#13684_1_copies:polyA_is_-1 coordinates are BetaCoV/England/02/2020; mRNA#50272_1_copies:polyA_is_-1 coordinates are BetaCoV/England/02/2020; mRNA#44803_1_copies:polyA_is_-1 coordinates are BetaCoV/England/02/2020; mRNA#26254_1_copies:polyA_is_-1 coordinates are BetaCoV/England/02/2020; mRNA#68084_1_copies:polyA_is_-1 co…
SARS2_ORF1a	4	518	527	KGAWNIGEQK	MESLVPGFNEKTHVQLSLPVLQVRDVLVRGFGDSVEEVLSEARQHLKDGTCGLVEVEKGVLPQLEQPYVFIKRSDARTAPHGHVMVELVAELEGIQYGRSGETLGVLVPHVGEIPVAYRKVLLRKNGNKGAGGHSYGADLKSFDLGDELGTDPYEDFQENWNTKHSSGVTRELMRELNGGAYTRYVDNNFCGPDGYPLECIKDLLARAGKASCTLSEQLDFIDTKRGVYCCREHEHEIAWYTERSEKSYELQTPFEIKLAKKFDTFNGECPNFVFPLNSIIKTIQPRVEKKKLDGFMGRIRSVYPVASPNECNQMCLSTLMKCDHCGETSWQTGDFVKATCEFCGTENLTKEGATTCGYLPQNAVVKIYCPACHNSEVGPEHSLAEYHNESGLKTILRK…	mRNA#51144_1_copies:polyA_is_-1 coordinates are BetaCoV/England/02/2020; mRNA#13684_1_copies:polyA_is_-1 coordinates are BetaCoV/England/02/2020; mRNA#50272_1_copies:polyA_is_-1 coordinates are BetaCoV/England/02/2020; mRNA#44803_1_copies:polyA_is_-1 coordinates are BetaCoV/England/02/2020; mRNA#26254_1_copies:polyA_is_-1 coordinates are BetaCoV/England/02/2020; mRNA#68084_1_copies:polyA_is_-1 co…
SARS2_ORF1a	1	519	527	GAWNIGEQK	MESLVPGFNEKTHVQLSLPVLQVRDVLVRGFGDSVEEVLSEARQHLKDGTCGLVEVEKGVLPQLEQPYVFIKRSDARTAPHGHVMVELVAELEGIQYGRSGETLGVLVPHVGEIPVAYRKVLLRKNGNKGAGGHSYGADLKSFDLGDELGTDPYEDFQENWNTKHSSGVTRELMRELNGGAYTRYVDNNFCGPDGYPLECIKDLLARAGKASCTLSEQLDFIDTKRGVYCCREHEHEIAWYTERSEKSYELQTPFEIKLAKKFDTFNGECPNFVFPLNSIIKTIQPRVEKKKLDGFMGRIRSVYPVASPNECNQMCLSTLMKCDHCGETSWQTGDFVKATCEFCGTENLTKEGATTCGYLPQNAVVKIYCPACHNSEVGPEHSLAEYHNESGLKTILRK…	mRNA#51144_1_copies:polyA_is_-1 coordinates are BetaCoV/England/02/2020; mRNA#13684_1_copies:polyA_is_-1 coordinates are BetaCoV/England/02/2020; mRNA#50272_1_copies:polyA_is_-1 coordinates are BetaCoV/England/02/2020; mRNA#44803_1_copies:polyA_is_-1 coordinates are BetaCoV/England/02/2020; mRNA#26254_1_copies:polyA_is_-1 coordinates are BetaCoV/England/02/2020; mRNA#68084_1_copies:polyA_is_-1 co…
SARS2_ORF1a	29	528	542	SILSPLYAFASEAAR	MESLVPGFNEKTHVQLSLPVLQVRDVLVRGFGDSVEEVLSEARQHLKDGTCGLVEVEKGVLPQLEQPYVFIKRSDARTAPHGHVMVELVAELEGIQYGRSGETLGVLVPHVGEIPVAYRKVLLRKNGNKGAGGHSYGADLKSFDLGDELGTDPYEDFQENWNTKHSSGVTRELMRELNGGAYTRYVDNNFCGPDGYPLECIKDLLARAGKASCTLSEQLDFIDTKRGVYCCREHEHEIAWYTERSEKSYELQTPFEIKLAKKFDTFNGECPNFVFPLNSIIKTIQPRVEKKKLDGFMGRIRSVYPVASPNECNQMCLSTLMKCDHCGETSWQTGDFVKATCEFCGTENLTKEGATTCGYLPQNAVVKIYCPACHNSEVGPEHSLAEYHNESGLKTILRK…	mRNA#51144_1_copies:polyA_is_-1 coordinates are BetaCoV/England/02/2020; mRNA#13684_1_copies:polyA_is_-1 coordinates are BetaCoV/England/02/2020; mRNA#50272_1_copies:polyA_is_-1 coordinates are BetaCoV/England/02/2020; mRNA#26254_1_copies:polyA_is_-1 coordinates are BetaCoV/England/02/2020; mRNA#68084_1_copies:polyA_is_-1 coordinates are BetaCoV/England/02/2020; mRNA#19062_1_copies:polyA_is_-1 co…
SARS2_ORF1a	9	551	560	TLETAQNSVR	MESLVPGFNEKTHVQLSLPVLQVRDVLVRGFGDSVEEVLSEARQHLKDGTCGLVEVEKGVLPQLEQPYVFIKRSDARTAPHGHVMVELVAELEGIQYGRSGETLGVLVPHVGEIPVAYRKVLLRKNGNKGAGGHSYGADLKSFDLGDELGTDPYEDFQENWNTKHSSGVTRELMRELNGGAYTRYVDNNFCGPDGYPLECIKDLLARAGKASCTLSEQLDFIDTKRGVYCCREHEHEIAWYTERSEKSYELQTPFEIKLAKKFDTFNGECPNFVFPLNSIIKTIQPRVEKKKLDGFMGRIRSVYPVASPNECNQMCLSTLMKCDHCGETSWQTGDFVKATCEFCGTENLTKEGATTCGYLPQNAVVKIYCPACHNSEVGPEHSLAEYHNESGLKTILRK…	mRNA#51144_1_copies:polyA_is_-1 coordinates are BetaCoV/England/02/2020; mRNA#13684_1_copies:polyA_is_-1 coordinates are BetaCoV/England/02/2020; mRNA#50272_1_copies:polyA_is_-1 coordinates are BetaCoV/England/02/2020; mRNA#26254_1_copies:polyA_is_-1 coordinates are BetaCoV/England/02/2020; mRNA#68084_1_copies:polyA_is_-1 coordinates are BetaCoV/England/02/2020; mRNA#19062_1_copies:polyA_is_-1 co…
SARS2_ORF1a	20	565	579	AAITILDGISQYSLR	MESLVPGFNEKTHVQLSLPVLQVRDVLVRGFGDSVEEVLSEARQHLKDGTCGLVEVEKGVLPQLEQPYVFIKRSDARTAPHGHVMVELVAELEGIQYGRSGETLGVLVPHVGEIPVAYRKVLLRKNGNKGAGGHSYGADLKSFDLGDELGTDPYEDFQENWNTKHSSGVTRELMRELNGGAYTRYVDNNFCGPDGYPLECIKDLLARAGKASCTLSEQLDFIDTKRGVYCCREHEHEIAWYTERSEKSYELQTPFEIKLAKKFDTFNGECPNFVFPLNSIIKTIQPRVEKKKLDGFMGRIRSVYPVASPNECNQMCLSTLMKCDHCGETSWQTGDFVKATCEFCGTENLTKEGATTCGYLPQNAVVKIYCPACHNSEVGPEHSLAEYHNESGLKTILRK…	mRNA#51144_1_copies:polyA_is_-1 coordinates are BetaCoV/England/02/2020; mRNA#13684_1_copies:polyA_is_-1 coordinates are BetaCoV/England/02/2020; mRNA#50272_1_copies:polyA_is_-1 coordinates are BetaCoV/England/02/2020; mRNA#26254_1_copies:polyA_is_-1 coordinates are BetaCoV/England/02/2020; mRNA#68084_1_copies:polyA_is_-1 coordinates are BetaCoV/England/02/2020; mRNA#19062_1_copies:polyA_is_-1 co…
SARS2_ORF1a	7	624	634	LKPVLDWLEEK	MESLVPGFNEKTHVQLSLPVLQVRDVLVRGFGDSVEEVLSEARQHLKDGTCGLVEVEKGVLPQLEQPYVFIKRSDARTAPHGHVMVELVAELEGIQYGRSGETLGVLVPHVGEIPVAYRKVLLRKNGNKGAGGHSYGADLKSFDLGDELGTDPYEDFQENWNTKHSSGVTRELMRELNGGAYTRYVDNNFCGPDGYPLECIKDLLARAGKASCTLSEQLDFIDTKRGVYCCREHEHEIAWYTERSEKSYELQTPFEIKLAKKFDTFNGECPNFVFPLNSIIKTIQPRVEKKKLDGFMGRIRSVYPVASPNECNQMCLSTLMKCDHCGETSWQTGDFVKATCEFCGTENLTKEGATTCGYLPQNAVVKIYCPACHNSEVGPEHSLAEYHNESGLKTILRK…	mRNA#13684_1_copies:polyA_is_-1 coordinates are BetaCoV/England/02/2020; mRNA#50272_1_copies:polyA_is_-1 coordinates are BetaCoV/England/02/2020; mRNA#26254_1_copies:polyA_is_-1 coordinates are BetaCoV/England/02/2020; mRNA#68084_1_copies:polyA_is_-1 coordinates are BetaCoV/England/02/2020; mRNA#50734_1_copies:polyA_is_-1 coordinates are BetaCoV/England/02/2020; mRNA#19062_1_copies:polyA_is_-1 co…
SARS2_ORF1a	1	635	643	FKEGVEFLR	MESLVPGFNEKTHVQLSLPVLQVRDVLVRGFGDSVEEVLSEARQHLKDGTCGLVEVEKGVLPQLEQPYVFIKRSDARTAPHGHVMVELVAELEGIQYGRSGETLGVLVPHVGEIPVAYRKVLLRKNGNKGAGGHSYGADLKSFDLGDELGTDPYEDFQENWNTKHSSGVTRELMRELNGGAYTRYVDNNFCGPDGYPLECIKDLLARAGKASCTLSEQLDFIDTKRGVYCCREHEHEIAWYTERSEKSYELQTPFEIKLAKKFDTFNGECPNFVFPLNSIIKTIQPRVEKKKLDGFMGRIRSVYPVASPNECNQMCLSTLMKCDHCGETSWQTGDFVKATCEFCGTENLTKEGATTCGYLPQNAVVKIYCPACHNSEVGPEHSLAEYHNESGLKTILRK…	mRNA#13684_1_copies:polyA_is_-1 coordinates are BetaCoV/England/02/2020; mRNA#50272_1_copies:polyA_is_-1 coordinates are BetaCoV/England/02/2020; mRNA#26254_1_copies:polyA_is_-1 coordinates are BetaCoV/England/02/2020; mRNA#68084_1_copies:polyA_is_-1 coordinates are BetaCoV/England/02/2020; mRNA#50734_1_copies:polyA_is_-1 coordinates are BetaCoV/England/02/2020; mRNA#19062_1_copies:polyA_is_-1 co…
SARS2_ORF1a	3	637	643	EGVEFLR	MESLVPGFNEKTHVQLSLPVLQVRDVLVRGFGDSVEEVLSEARQHLKDGTCGLVEVEKGVLPQLEQPYVFIKRSDARTAPHGHVMVELVAELEGIQYGRSGETLGVLVPHVGEIPVAYRKVLLRKNGNKGAGGHSYGADLKSFDLGDELGTDPYEDFQENWNTKHSSGVTRELMRELNGGAYTRYVDNNFCGPDGYPLECIKDLLARAGKASCTLSEQLDFIDTKRGVYCCREHEHEIAWYTERSEKSYELQTPFEIKLAKKFDTFNGECPNFVFPLNSIIKTIQPRVEKKKLDGFMGRIRSVYPVASPNECNQMCLSTLMKCDHCGETSWQTGDFVKATCEFCGTENLTKEGATTCGYLPQNAVVKIYCPACHNSEVGPEHSLAEYHNESGLKTILRK…	mRNA#13684_1_copies:polyA_is_-1 coordinates are BetaCoV/England/02/2020; mRNA#50272_1_copies:polyA_is_-1 coordinates are BetaCoV/England/02/2020; mRNA#26254_1_copies:polyA_is_-1 coordinates are BetaCoV/England/02/2020; mRNA#68084_1_copies:polyA_is_-1 coordinates are BetaCoV/England/02/2020; mRNA#50734_1_copies:polyA_is_-1 coordinates are BetaCoV/England/02/2020; mRNA#19062_1_copies:polyA_is_-1 co…
SARS2_ORF1a	1	651	669	FISTCACEIVGGQIVTCAK	MESLVPGFNEKTHVQLSLPVLQVRDVLVRGFGDSVEEVLSEARQHLKDGTCGLVEVEKGVLPQLEQPYVFIKRSDARTAPHGHVMVELVAELEGIQYGRSGETLGVLVPHVGEIPVAYRKVLLRKNGNKGAGGHSYGADLKSFDLGDELGTDPYEDFQENWNTKHSSGVTRELMRELNGGAYTRYVDNNFCGPDGYPLECIKDLLARAGKASCTLSEQLDFIDTKRGVYCCREHEHEIAWYTERSEKSYELQTPFEIKLAKKFDTFNGECPNFVFPLNSIIKTIQPRVEKKKLDGFMGRIRSVYPVASPNECNQMCLSTLMKCDHCGETSWQTGDFVKATCEFCGTENLTKEGATTCGYLPQNAVVKIYCPACHNSEVGPEHSLAEYHNESGLKTILRK…	mRNA#13684_1_copies:polyA_is_-1 coordinates are BetaCoV/England/02/2020; mRNA#50272_1_copies:polyA_is_-1 coordinates are BetaCoV/England/02/2020; mRNA#26254_1_copies:polyA_is_-1 coordinates are BetaCoV/England/02/2020; mRNA#68084_1_copies:polyA_is_-1 coordinates are BetaCoV/England/02/2020; mRNA#50734_1_copies:polyA_is_-1 coordinates are BetaCoV/England/02/2020; mRNA#19062_1_copies:polyA_is_-1 co…
SARS2_ORF1a	1	670	680	EIKESVQTFFK	MESLVPGFNEKTHVQLSLPVLQVRDVLVRGFGDSVEEVLSEARQHLKDGTCGLVEVEKGVLPQLEQPYVFIKRSDARTAPHGHVMVELVAELEGIQYGRSGETLGVLVPHVGEIPVAYRKVLLRKNGNKGAGGHSYGADLKSFDLGDELGTDPYEDFQENWNTKHSSGVTRELMRELNGGAYTRYVDNNFCGPDGYPLECIKDLLARAGKASCTLSEQLDFIDTKRGVYCCREHEHEIAWYTERSEKSYELQTPFEIKLAKKFDTFNGECPNFVFPLNSIIKTIQPRVEKKKLDGFMGRIRSVYPVASPNECNQMCLSTLMKCDHCGETSWQTGDFVKATCEFCGTENLTKEGATTCGYLPQNAVVKIYCPACHNSEVGPEHSLAEYHNESGLKTILRK…	mRNA#13684_1_copies:polyA_is_-1 coordinates are BetaCoV/England/02/2020; mRNA#50272_1_copies:polyA_is_-1 coordinates are BetaCoV/England/02/2020; mRNA#26254_1_copies:polyA_is_-1 coordinates are BetaCoV/England/02/2020; mRNA#68084_1_copies:polyA_is_-1 coordinates are BetaCoV/England/02/2020; mRNA#50734_1_copies:polyA_is_-1 coordinates are BetaCoV/England/02/2020; mRNA#19062_1_copies:polyA_is_-1 co…
SARS2_ORF1a	6	673	680	ESVQTFFK	MESLVPGFNEKTHVQLSLPVLQVRDVLVRGFGDSVEEVLSEARQHLKDGTCGLVEVEKGVLPQLEQPYVFIKRSDARTAPHGHVMVELVAELEGIQYGRSGETLGVLVPHVGEIPVAYRKVLLRKNGNKGAGGHSYGADLKSFDLGDELGTDPYEDFQENWNTKHSSGVTRELMRELNGGAYTRYVDNNFCGPDGYPLECIKDLLARAGKASCTLSEQLDFIDTKRGVYCCREHEHEIAWYTERSEKSYELQTPFEIKLAKKFDTFNGECPNFVFPLNSIIKTIQPRVEKKKLDGFMGRIRSVYPVASPNECNQMCLSTLMKCDHCGETSWQTGDFVKATCEFCGTENLTKEGATTCGYLPQNAVVKIYCPACHNSEVGPEHSLAEYHNESGLKTILRK…	mRNA#13684_1_copies:polyA_is_-1 coordinates are BetaCoV/England/02/2020; mRNA#50272_1_copies:polyA_is_-1 coordinates are BetaCoV/England/02/2020; mRNA#26254_1_copies:polyA_is_-1 coordinates are BetaCoV/England/02/2020; mRNA#68084_1_copies:polyA_is_-1 coordinates are BetaCoV/England/02/2020; mRNA#50734_1_copies:polyA_is_-1 coordinates are BetaCoV/England/02/2020; mRNA#19062_1_copies:polyA_is_-1 co…
SARS2_ORF1a	1	681	699	LVNKFLALCADSIIIGGAK	MESLVPGFNEKTHVQLSLPVLQVRDVLVRGFGDSVEEVLSEARQHLKDGTCGLVEVEKGVLPQLEQPYVFIKRSDARTAPHGHVMVELVAELEGIQYGRSGETLGVLVPHVGEIPVAYRKVLLRKNGNKGAGGHSYGADLKSFDLGDELGTDPYEDFQENWNTKHSSGVTRELMRELNGGAYTRYVDNNFCGPDGYPLECIKDLLARAGKASCTLSEQLDFIDTKRGVYCCREHEHEIAWYTERSEKSYELQTPFEIKLAKKFDTFNGECPNFVFPLNSIIKTIQPRVEKKKLDGFMGRIRSVYPVASPNECNQMCLSTLMKCDHCGETSWQTGDFVKATCEFCGTENLTKEGATTCGYLPQNAVVKIYCPACHNSEVGPEHSLAEYHNESGLKTILRK…	mRNA#13684_1_copies:polyA_is_-1 coordinates are BetaCoV/England/02/2020; mRNA#50272_1_copies:polyA_is_-1 coordinates are BetaCoV/England/02/2020; mRNA#26254_1_copies:polyA_is_-1 coordinates are BetaCoV/England/02/2020; mRNA#68084_1_copies:polyA_is_-1 coordinates are BetaCoV/England/02/2020; mRNA#50734_1_copies:polyA_is_-1 coordinates are BetaCoV/England/02/2020; mRNA#19062_1_copies:polyA_is_-1 co…
SARS2_ORF1a	4	685	699	FLALCADSIIIGGAK	MESLVPGFNEKTHVQLSLPVLQVRDVLVRGFGDSVEEVLSEARQHLKDGTCGLVEVEKGVLPQLEQPYVFIKRSDARTAPHGHVMVELVAELEGIQYGRSGETLGVLVPHVGEIPVAYRKVLLRKNGNKGAGGHSYGADLKSFDLGDELGTDPYEDFQENWNTKHSSGVTRELMRELNGGAYTRYVDNNFCGPDGYPLECIKDLLARAGKASCTLSEQLDFIDTKRGVYCCREHEHEIAWYTERSEKSYELQTPFEIKLAKKFDTFNGECPNFVFPLNSIIKTIQPRVEKKKLDGFMGRIRSVYPVASPNECNQMCLSTLMKCDHCGETSWQTGDFVKATCEFCGTENLTKEGATTCGYLPQNAVVKIYCPACHNSEVGPEHSLAEYHNESGLKTILRK…	mRNA#13684_1_copies:polyA_is_-1 coordinates are BetaCoV/England/02/2020; mRNA#50272_1_copies:polyA_is_-1 coordinates are BetaCoV/England/02/2020; mRNA#26254_1_copies:polyA_is_-1 coordinates are BetaCoV/England/02/2020; mRNA#68084_1_copies:polyA_is_-1 coordinates are BetaCoV/England/02/2020; mRNA#50734_1_copies:polyA_is_-1 coordinates are BetaCoV/England/02/2020; mRNA#19062_1_copies:polyA_is_-1 co…
SARS2_ORF1a	18	702	714	ALNLGETFVTHSK	MESLVPGFNEKTHVQLSLPVLQVRDVLVRGFGDSVEEVLSEARQHLKDGTCGLVEVEKGVLPQLEQPYVFIKRSDARTAPHGHVMVELVAELEGIQYGRSGETLGVLVPHVGEIPVAYRKVLLRKNGNKGAGGHSYGADLKSFDLGDELGTDPYEDFQENWNTKHSSGVTRELMRELNGGAYTRYVDNNFCGPDGYPLECIKDLLARAGKASCTLSEQLDFIDTKRGVYCCREHEHEIAWYTERSEKSYELQTPFEIKLAKKFDTFNGECPNFVFPLNSIIKTIQPRVEKKKLDGFMGRIRSVYPVASPNECNQMCLSTLMKCDHCGETSWQTGDFVKATCEFCGTENLTKEGATTCGYLPQNAVVKIYCPACHNSEVGPEHSLAEYHNESGLKTILRK…	mRNA#13684_1_copies:polyA_is_-1 coordinates are BetaCoV/England/02/2020; mRNA#50272_1_copies:polyA_is_-1 coordinates are BetaCoV/England/02/2020; mRNA#26254_1_copies:polyA_is_-1 coordinates are BetaCoV/England/02/2020; mRNA#68084_1_copies:polyA_is_-1 coordinates are BetaCoV/England/02/2020; mRNA#50734_1_copies:polyA_is_-1 coordinates are BetaCoV/England/02/2020; mRNA#19062_1_copies:polyA_is_-1 co…
SARS2_ORF1a	8	723	734	SREETGLLMPLK	MESLVPGFNEKTHVQLSLPVLQVRDVLVRGFGDSVEEVLSEARQHLKDGTCGLVEVEKGVLPQLEQPYVFIKRSDARTAPHGHVMVELVAELEGIQYGRSGETLGVLVPHVGEIPVAYRKVLLRKNGNKGAGGHSYGADLKSFDLGDELGTDPYEDFQENWNTKHSSGVTRELMRELNGGAYTRYVDNNFCGPDGYPLECIKDLLARAGKASCTLSEQLDFIDTKRGVYCCREHEHEIAWYTERSEKSYELQTPFEIKLAKKFDTFNGECPNFVFPLNSIIKTIQPRVEKKKLDGFMGRIRSVYPVASPNECNQMCLSTLMKCDHCGETSWQTGDFVKATCEFCGTENLTKEGATTCGYLPQNAVVKIYCPACHNSEVGPEHSLAEYHNESGLKTILRK…	mRNA#13684_1_copies:polyA_is_-1 coordinates are BetaCoV/England/02/2020; mRNA#50272_1_copies:polyA_is_-1 coordinates are BetaCoV/England/02/2020; mRNA#26254_1_copies:polyA_is_-1 coordinates are BetaCoV/England/02/2020; mRNA#68084_1_copies:polyA_is_-1 coordinates are BetaCoV/England/02/2020; mRNA#50734_1_copies:polyA_is_-1 coordinates are BetaCoV/England/02/2020; mRNA#19062_1_copies:polyA_is_-1 co…
SARS2_ORF1a	18	723	737	SREETGLLMPLKAPK	MESLVPGFNEKTHVQLSLPVLQVRDVLVRGFGDSVEEVLSEARQHLKDGTCGLVEVEKGVLPQLEQPYVFIKRSDARTAPHGHVMVELVAELEGIQYGRSGETLGVLVPHVGEIPVAYRKVLLRKNGNKGAGGHSYGADLKSFDLGDELGTDPYEDFQENWNTKHSSGVTRELMRELNGGAYTRYVDNNFCGPDGYPLECIKDLLARAGKASCTLSEQLDFIDTKRGVYCCREHEHEIAWYTERSEKSYELQTPFEIKLAKKFDTFNGECPNFVFPLNSIIKTIQPRVEKKKLDGFMGRIRSVYPVASPNECNQMCLSTLMKCDHCGETSWQTGDFVKATCEFCGTENLTKEGATTCGYLPQNAVVKIYCPACHNSEVGPEHSLAEYHNESGLKTILRK…	mRNA#13684_1_copies:polyA_is_-1 coordinates are BetaCoV/England/02/2020; mRNA#50272_1_copies:polyA_is_-1 coordinates are BetaCoV/England/02/2020; mRNA#26254_1_copies:polyA_is_-1 coordinates are BetaCoV/England/02/2020; mRNA#68084_1_copies:polyA_is_-1 coordinates are BetaCoV/England/02/2020; mRNA#50734_1_copies:polyA_is_-1 coordinates are BetaCoV/England/02/2020; mRNA#19062_1_copies:polyA_is_-1 co…
SARS2_ORF1a	1	725	734	EETGLLMPLK	MESLVPGFNEKTHVQLSLPVLQVRDVLVRGFGDSVEEVLSEARQHLKDGTCGLVEVEKGVLPQLEQPYVFIKRSDARTAPHGHVMVELVAELEGIQYGRSGETLGVLVPHVGEIPVAYRKVLLRKNGNKGAGGHSYGADLKSFDLGDELGTDPYEDFQENWNTKHSSGVTRELMRELNGGAYTRYVDNNFCGPDGYPLECIKDLLARAGKASCTLSEQLDFIDTKRGVYCCREHEHEIAWYTERSEKSYELQTPFEIKLAKKFDTFNGECPNFVFPLNSIIKTIQPRVEKKKLDGFMGRIRSVYPVASPNECNQMCLSTLMKCDHCGETSWQTGDFVKATCEFCGTENLTKEGATTCGYLPQNAVVKIYCPACHNSEVGPEHSLAEYHNESGLKTILRK…	mRNA#13684_1_copies:polyA_is_-1 coordinates are BetaCoV/England/02/2020; mRNA#50272_1_copies:polyA_is_-1 coordinates are BetaCoV/England/02/2020; mRNA#26254_1_copies:polyA_is_-1 coordinates are BetaCoV/England/02/2020; mRNA#68084_1_copies:polyA_is_-1 coordinates are BetaCoV/England/02/2020; mRNA#50734_1_copies:polyA_is_-1 coordinates are BetaCoV/England/02/2020; mRNA#19062_1_copies:polyA_is_-1 co…
SARS2_ORF1a	8	725	737	EETGLLMPLKAPK	MESLVPGFNEKTHVQLSLPVLQVRDVLVRGFGDSVEEVLSEARQHLKDGTCGLVEVEKGVLPQLEQPYVFIKRSDARTAPHGHVMVELVAELEGIQYGRSGETLGVLVPHVGEIPVAYRKVLLRKNGNKGAGGHSYGADLKSFDLGDELGTDPYEDFQENWNTKHSSGVTRELMRELNGGAYTRYVDNNFCGPDGYPLECIKDLLARAGKASCTLSEQLDFIDTKRGVYCCREHEHEIAWYTERSEKSYELQTPFEIKLAKKFDTFNGECPNFVFPLNSIIKTIQPRVEKKKLDGFMGRIRSVYPVASPNECNQMCLSTLMKCDHCGETSWQTGDFVKATCEFCGTENLTKEGATTCGYLPQNAVVKIYCPACHNSEVGPEHSLAEYHNESGLKTILRK…	mRNA#13684_1_copies:polyA_is_-1 coordinates are BetaCoV/England/02/2020; mRNA#50272_1_copies:polyA_is_-1 coordinates are BetaCoV/England/02/2020; mRNA#26254_1_copies:polyA_is_-1 coordinates are BetaCoV/England/02/2020; mRNA#68084_1_copies:polyA_is_-1 coordinates are BetaCoV/England/02/2020; mRNA#50734_1_copies:polyA_is_-1 coordinates are BetaCoV/England/02/2020; mRNA#19062_1_copies:polyA_is_-1 co…
SARS2_ORF1a	2	738	759	EIIFLEGETLPTEVLTEEVVLK	MESLVPGFNEKTHVQLSLPVLQVRDVLVRGFGDSVEEVLSEARQHLKDGTCGLVEVEKGVLPQLEQPYVFIKRSDARTAPHGHVMVELVAELEGIQYGRSGETLGVLVPHVGEIPVAYRKVLLRKNGNKGAGGHSYGADLKSFDLGDELGTDPYEDFQENWNTKHSSGVTRELMRELNGGAYTRYVDNNFCGPDGYPLECIKDLLARAGKASCTLSEQLDFIDTKRGVYCCREHEHEIAWYTERSEKSYELQTPFEIKLAKKFDTFNGECPNFVFPLNSIIKTIQPRVEKKKLDGFMGRIRSVYPVASPNECNQMCLSTLMKCDHCGETSWQTGDFVKATCEFCGTENLTKEGATTCGYLPQNAVVKIYCPACHNSEVGPEHSLAEYHNESGLKTILRK…	mRNA#13684_1_copies:polyA_is_-1 coordinates are BetaCoV/England/02/2020; mRNA#50272_1_copies:polyA_is_-1 coordinates are BetaCoV/England/02/2020; mRNA#68084_1_copies:polyA_is_-1 coordinates are BetaCoV/England/02/2020; mRNA#16482_1_copies:polyA_is_-1 coordinates are BetaCoV/England/02/2020; mRNA#19062_1_copies:polyA_is_-1 coordinates are BetaCoV/England/02/2020; mRNA#38725_1_copies:polyA_is_-1 co…
SARS2_ORF1a	12	799	816	YCALAPNMMVTNNTFTLK	MESLVPGFNEKTHVQLSLPVLQVRDVLVRGFGDSVEEVLSEARQHLKDGTCGLVEVEKGVLPQLEQPYVFIKRSDARTAPHGHVMVELVAELEGIQYGRSGETLGVLVPHVGEIPVAYRKVLLRKNGNKGAGGHSYGADLKSFDLGDELGTDPYEDFQENWNTKHSSGVTRELMRELNGGAYTRYVDNNFCGPDGYPLECIKDLLARAGKASCTLSEQLDFIDTKRGVYCCREHEHEIAWYTERSEKSYELQTPFEIKLAKKFDTFNGECPNFVFPLNSIIKTIQPRVEKKKLDGFMGRIRSVYPVASPNECNQMCLSTLMKCDHCGETSWQTGDFVKATCEFCGTENLTKEGATTCGYLPQNAVVKIYCPACHNSEVGPEHSLAEYHNESGLKTILRK…	mRNA#13684_1_copies:polyA_is_-1 coordinates are BetaCoV/England/02/2020; mRNA#50272_1_copies:polyA_is_-1 coordinates are BetaCoV/England/02/2020; mRNA#16482_1_copies:polyA_is_-1 coordinates are BetaCoV/England/02/2020; mRNA#19062_1_copies:polyA_is_-1 coordinates are BetaCoV/England/02/2020; mRNA#38725_1_copies:polyA_is_-1 coordinates are BetaCoV/England/02/2020; mRNA#30263_1_copies:polyA_is_-1 co…
SARS2_ORF1a	4	823	837	VTFGDDTVIEVQGYK	MESLVPGFNEKTHVQLSLPVLQVRDVLVRGFGDSVEEVLSEARQHLKDGTCGLVEVEKGVLPQLEQPYVFIKRSDARTAPHGHVMVELVAELEGIQYGRSGETLGVLVPHVGEIPVAYRKVLLRKNGNKGAGGHSYGADLKSFDLGDELGTDPYEDFQENWNTKHSSGVTRELMRELNGGAYTRYVDNNFCGPDGYPLECIKDLLARAGKASCTLSEQLDFIDTKRGVYCCREHEHEIAWYTERSEKSYELQTPFEIKLAKKFDTFNGECPNFVFPLNSIIKTIQPRVEKKKLDGFMGRIRSVYPVASPNECNQMCLSTLMKCDHCGETSWQTGDFVKATCEFCGTENLTKEGATTCGYLPQNAVVKIYCPACHNSEVGPEHSLAEYHNESGLKTILRK…	mRNA#13684_1_copies:polyA_is_-1 coordinates are BetaCoV/England/02/2020; mRNA#35742_1_copies:polyA_is_-1 coordinates are BetaCoV/England/02/2020; mRNA#18463_1_copies:polyA_is_-1 coordinates are BetaCoV/England/02/2020; mRNA#43928_1_copies:polyA_is_-1 coordinates are BetaCoV/England/02/2020; mRNA#20659_1_copies:polyA_is_-1 coordinates are BetaCoV/England/02/2020; mRNA#16482_1_copies:polyA_is_-1 co…
SARS2_ORF1a	2	838	848	SVNITFELDER	MESLVPGFNEKTHVQLSLPVLQVRDVLVRGFGDSVEEVLSEARQHLKDGTCGLVEVEKGVLPQLEQPYVFIKRSDARTAPHGHVMVELVAELEGIQYGRSGETLGVLVPHVGEIPVAYRKVLLRKNGNKGAGGHSYGADLKSFDLGDELGTDPYEDFQENWNTKHSSGVTRELMRELNGGAYTRYVDNNFCGPDGYPLECIKDLLARAGKASCTLSEQLDFIDTKRGVYCCREHEHEIAWYTERSEKSYELQTPFEIKLAKKFDTFNGECPNFVFPLNSIIKTIQPRVEKKKLDGFMGRIRSVYPVASPNECNQMCLSTLMKCDHCGETSWQTGDFVKATCEFCGTENLTKEGATTCGYLPQNAVVKIYCPACHNSEVGPEHSLAEYHNESGLKTILRK…	mRNA#13684_1_copies:polyA_is_-1 coordinates are BetaCoV/England/02/2020; mRNA#35742_1_copies:polyA_is_-1 coordinates are BetaCoV/England/02/2020; mRNA#18463_1_copies:polyA_is_-1 coordinates are BetaCoV/England/02/2020; mRNA#43928_1_copies:polyA_is_-1 coordinates are BetaCoV/England/02/2020; mRNA#20659_1_copies:polyA_is_-1 coordinates are BetaCoV/England/02/2020; mRNA#16482_1_copies:polyA_is_-1 co…
SARS2_ORF1a	8	1034	1041	LTDNVYIK	MESLVPGFNEKTHVQLSLPVLQVRDVLVRGFGDSVEEVLSEARQHLKDGTCGLVEVEKGVLPQLEQPYVFIKRSDARTAPHGHVMVELVAELEGIQYGRSGETLGVLVPHVGEIPVAYRKVLLRKNGNKGAGGHSYGADLKSFDLGDELGTDPYEDFQENWNTKHSSGVTRELMRELNGGAYTRYVDNNFCGPDGYPLECIKDLLARAGKASCTLSEQLDFIDTKRGVYCCREHEHEIAWYTERSEKSYELQTPFEIKLAKKFDTFNGECPNFVFPLNSIIKTIQPRVEKKKLDGFMGRIRSVYPVASPNECNQMCLSTLMKCDHCGETSWQTGDFVKATCEFCGTENLTKEGATTCGYLPQNAVVKIYCPACHNSEVGPEHSLAEYHNESGLKTILRK…	mRNA#13684_1_copies:polyA_is_-1 coordinates are BetaCoV/England/02/2020; mRNA#35742_1_copies:polyA_is_-1 coordinates are BetaCoV/England/02/2020; mRNA#18463_1_copies:polyA_is_-1 coordinates are BetaCoV/England/02/2020; mRNA#43928_1_copies:polyA_is_-1 coordinates are BetaCoV/England/02/2020; mRNA#20659_1_copies:polyA_is_-1 coordinates are BetaCoV/England/02/2020; mRNA#16482_1_copies:polyA_is_-1 co…
SARS2_ORF1a	8	1042	1050	NADIVEEAK	MESLVPGFNEKTHVQLSLPVLQVRDVLVRGFGDSVEEVLSEARQHLKDGTCGLVEVEKGVLPQLEQPYVFIKRSDARTAPHGHVMVELVAELEGIQYGRSGETLGVLVPHVGEIPVAYRKVLLRKNGNKGAGGHSYGADLKSFDLGDELGTDPYEDFQENWNTKHSSGVTRELMRELNGGAYTRYVDNNFCGPDGYPLECIKDLLARAGKASCTLSEQLDFIDTKRGVYCCREHEHEIAWYTERSEKSYELQTPFEIKLAKKFDTFNGECPNFVFPLNSIIKTIQPRVEKKKLDGFMGRIRSVYPVASPNECNQMCLSTLMKCDHCGETSWQTGDFVKATCEFCGTENLTKEGATTCGYLPQNAVVKIYCPACHNSEVGPEHSLAEYHNESGLKTILRK…	mRNA#13684_1_copies:polyA_is_-1 coordinates are BetaCoV/England/02/2020; mRNA#35742_1_copies:polyA_is_-1 coordinates are BetaCoV/England/02/2020; mRNA#18463_1_copies:polyA_is_-1 coordinates are BetaCoV/England/02/2020; mRNA#43928_1_copies:polyA_is_-1 coordinates are BetaCoV/England/02/2020; mRNA#20659_1_copies:polyA_is_-1 coordinates are BetaCoV/England/02/2020; mRNA#16482_1_copies:polyA_is_-1 co…
SARS2_ORF1a	8	1042	1051	NADIVEEAKK	MESLVPGFNEKTHVQLSLPVLQVRDVLVRGFGDSVEEVLSEARQHLKDGTCGLVEVEKGVLPQLEQPYVFIKRSDARTAPHGHVMVELVAELEGIQYGRSGETLGVLVPHVGEIPVAYRKVLLRKNGNKGAGGHSYGADLKSFDLGDELGTDPYEDFQENWNTKHSSGVTRELMRELNGGAYTRYVDNNFCGPDGYPLECIKDLLARAGKASCTLSEQLDFIDTKRGVYCCREHEHEIAWYTERSEKSYELQTPFEIKLAKKFDTFNGECPNFVFPLNSIIKTIQPRVEKKKLDGFMGRIRSVYPVASPNECNQMCLSTLMKCDHCGETSWQTGDFVKATCEFCGTENLTKEGATTCGYLPQNAVVKIYCPACHNSEVGPEHSLAEYHNESGLKTILRK…	mRNA#13684_1_copies:polyA_is_-1 coordinates are BetaCoV/England/02/2020; mRNA#35742_1_copies:polyA_is_-1 coordinates are BetaCoV/England/02/2020; mRNA#18463_1_copies:polyA_is_-1 coordinates are BetaCoV/England/02/2020; mRNA#43928_1_copies:polyA_is_-1 coordinates are BetaCoV/England/02/2020; mRNA#20659_1_copies:polyA_is_-1 coordinates are BetaCoV/England/02/2020; mRNA#16482_1_copies:polyA_is_-1 co…
SARS2_ORF1a	3	1051	1066	KVKPTVVVNAANVYLK	MESLVPGFNEKTHVQLSLPVLQVRDVLVRGFGDSVEEVLSEARQHLKDGTCGLVEVEKGVLPQLEQPYVFIKRSDARTAPHGHVMVELVAELEGIQYGRSGETLGVLVPHVGEIPVAYRKVLLRKNGNKGAGGHSYGADLKSFDLGDELGTDPYEDFQENWNTKHSSGVTRELMRELNGGAYTRYVDNNFCGPDGYPLECIKDLLARAGKASCTLSEQLDFIDTKRGVYCCREHEHEIAWYTERSEKSYELQTPFEIKLAKKFDTFNGECPNFVFPLNSIIKTIQPRVEKKKLDGFMGRIRSVYPVASPNECNQMCLSTLMKCDHCGETSWQTGDFVKATCEFCGTENLTKEGATTCGYLPQNAVVKIYCPACHNSEVGPEHSLAEYHNESGLKTILRK…	mRNA#13684_1_copies:polyA_is_-1 coordinates are BetaCoV/England/02/2020; mRNA#35742_1_copies:polyA_is_-1 coordinates are BetaCoV/England/02/2020; mRNA#18463_1_copies:polyA_is_-1 coordinates are BetaCoV/England/02/2020; mRNA#43928_1_copies:polyA_is_-1 coordinates are BetaCoV/England/02/2020; mRNA#20659_1_copies:polyA_is_-1 coordinates are BetaCoV/England/02/2020; mRNA#16482_1_copies:polyA_is_-1 co…
SARS2_ORF1a	26	1052	1066	VKPTVVVNAANVYLK	MESLVPGFNEKTHVQLSLPVLQVRDVLVRGFGDSVEEVLSEARQHLKDGTCGLVEVEKGVLPQLEQPYVFIKRSDARTAPHGHVMVELVAELEGIQYGRSGETLGVLVPHVGEIPVAYRKVLLRKNGNKGAGGHSYGADLKSFDLGDELGTDPYEDFQENWNTKHSSGVTRELMRELNGGAYTRYVDNNFCGPDGYPLECIKDLLARAGKASCTLSEQLDFIDTKRGVYCCREHEHEIAWYTERSEKSYELQTPFEIKLAKKFDTFNGECPNFVFPLNSIIKTIQPRVEKKKLDGFMGRIRSVYPVASPNECNQMCLSTLMKCDHCGETSWQTGDFVKATCEFCGTENLTKEGATTCGYLPQNAVVKIYCPACHNSEVGPEHSLAEYHNESGLKTILRK…	mRNA#13684_1_copies:polyA_is_-1 coordinates are BetaCoV/England/02/2020; mRNA#35742_1_copies:polyA_is_-1 coordinates are BetaCoV/England/02/2020; mRNA#18463_1_copies:polyA_is_-1 coordinates are BetaCoV/England/02/2020; mRNA#43928_1_copies:polyA_is_-1 coordinates are BetaCoV/England/02/2020; mRNA#20659_1_copies:polyA_is_-1 coordinates are BetaCoV/England/02/2020; mRNA#16482_1_copies:polyA_is_-1 co…
SARS2_ORF1a	6	1067	1077	HGGGVAGALNK	MESLVPGFNEKTHVQLSLPVLQVRDVLVRGFGDSVEEVLSEARQHLKDGTCGLVEVEKGVLPQLEQPYVFIKRSDARTAPHGHVMVELVAELEGIQYGRSGETLGVLVPHVGEIPVAYRKVLLRKNGNKGAGGHSYGADLKSFDLGDELGTDPYEDFQENWNTKHSSGVTRELMRELNGGAYTRYVDNNFCGPDGYPLECIKDLLARAGKASCTLSEQLDFIDTKRGVYCCREHEHEIAWYTERSEKSYELQTPFEIKLAKKFDTFNGECPNFVFPLNSIIKTIQPRVEKKKLDGFMGRIRSVYPVASPNECNQMCLSTLMKCDHCGETSWQTGDFVKATCEFCGTENLTKEGATTCGYLPQNAVVKIYCPACHNSEVGPEHSLAEYHNESGLKTILRK…	mRNA#13684_1_copies:polyA_is_-1 coordinates are BetaCoV/England/02/2020; mRNA#35742_1_copies:polyA_is_-1 coordinates are BetaCoV/England/02/2020; mRNA#18463_1_copies:polyA_is_-1 coordinates are BetaCoV/England/02/2020; mRNA#43928_1_copies:polyA_is_-1 coordinates are BetaCoV/England/02/2020; mRNA#20659_1_copies:polyA_is_-1 coordinates are BetaCoV/England/02/2020; mRNA#16482_1_copies:polyA_is_-1 co…
SARS2_ORF1a	44	1078	1098	ATNNAMQVESDDYIATNGPLK	MESLVPGFNEKTHVQLSLPVLQVRDVLVRGFGDSVEEVLSEARQHLKDGTCGLVEVEKGVLPQLEQPYVFIKRSDARTAPHGHVMVELVAELEGIQYGRSGETLGVLVPHVGEIPVAYRKVLLRKNGNKGAGGHSYGADLKSFDLGDELGTDPYEDFQENWNTKHSSGVTRELMRELNGGAYTRYVDNNFCGPDGYPLECIKDLLARAGKASCTLSEQLDFIDTKRGVYCCREHEHEIAWYTERSEKSYELQTPFEIKLAKKFDTFNGECPNFVFPLNSIIKTIQPRVEKKKLDGFMGRIRSVYPVASPNECNQMCLSTLMKCDHCGETSWQTGDFVKATCEFCGTENLTKEGATTCGYLPQNAVVKIYCPACHNSEVGPEHSLAEYHNESGLKTILRK…	mRNA#13684_1_copies:polyA_is_-1 coordinates are BetaCoV/England/02/2020; mRNA#35742_1_copies:polyA_is_-1 coordinates are BetaCoV/England/02/2020; mRNA#18463_1_copies:polyA_is_-1 coordinates are BetaCoV/England/02/2020; mRNA#43928_1_copies:polyA_is_-1 coordinates are BetaCoV/England/02/2020; mRNA#20659_1_copies:polyA_is_-1 coordinates are BetaCoV/England/02/2020; mRNA#16482_1_copies:polyA_is_-1 co…
SARS2_ORF1a	12	1099	1112	VGGSCVLSGHNLAK	MESLVPGFNEKTHVQLSLPVLQVRDVLVRGFGDSVEEVLSEARQHLKDGTCGLVEVEKGVLPQLEQPYVFIKRSDARTAPHGHVMVELVAELEGIQYGRSGETLGVLVPHVGEIPVAYRKVLLRKNGNKGAGGHSYGADLKSFDLGDELGTDPYEDFQENWNTKHSSGVTRELMRELNGGAYTRYVDNNFCGPDGYPLECIKDLLARAGKASCTLSEQLDFIDTKRGVYCCREHEHEIAWYTERSEKSYELQTPFEIKLAKKFDTFNGECPNFVFPLNSIIKTIQPRVEKKKLDGFMGRIRSVYPVASPNECNQMCLSTLMKCDHCGETSWQTGDFVKATCEFCGTENLTKEGATTCGYLPQNAVVKIYCPACHNSEVGPEHSLAEYHNESGLKTILRK…	mRNA#13684_1_copies:polyA_is_-1 coordinates are BetaCoV/England/02/2020; mRNA#35742_1_copies:polyA_is_-1 coordinates are BetaCoV/England/02/2020; mRNA#18463_1_copies:polyA_is_-1 coordinates are BetaCoV/England/02/2020; mRNA#43928_1_copies:polyA_is_-1 coordinates are BetaCoV/England/02/2020; mRNA#20659_1_copies:polyA_is_-1 coordinates are BetaCoV/England/02/2020; mRNA#16482_1_copies:polyA_is_-1 co…
SARS2_ORF1a	6	1113	1124	HCLHVVGPNVNK	MESLVPGFNEKTHVQLSLPVLQVRDVLVRGFGDSVEEVLSEARQHLKDGTCGLVEVEKGVLPQLEQPYVFIKRSDARTAPHGHVMVELVAELEGIQYGRSGETLGVLVPHVGEIPVAYRKVLLRKNGNKGAGGHSYGADLKSFDLGDELGTDPYEDFQENWNTKHSSGVTRELMRELNGGAYTRYVDNNFCGPDGYPLECIKDLLARAGKASCTLSEQLDFIDTKRGVYCCREHEHEIAWYTERSEKSYELQTPFEIKLAKKFDTFNGECPNFVFPLNSIIKTIQPRVEKKKLDGFMGRIRSVYPVASPNECNQMCLSTLMKCDHCGETSWQTGDFVKATCEFCGTENLTKEGATTCGYLPQNAVVKIYCPACHNSEVGPEHSLAEYHNESGLKTILRK…	mRNA#13684_1_copies:polyA_is_-1 coordinates are BetaCoV/England/02/2020; mRNA#35742_1_copies:polyA_is_-1 coordinates are BetaCoV/England/02/2020; mRNA#18463_1_copies:polyA_is_-1 coordinates are BetaCoV/England/02/2020; mRNA#43928_1_copies:polyA_is_-1 coordinates are BetaCoV/England/02/2020; mRNA#20659_1_copies:polyA_is_-1 coordinates are BetaCoV/England/02/2020; mRNA#16482_1_copies:polyA_is_-1 co…
SARS2_ORF1a	9	1113	1132	HCLHVVGPNVNKGEDIQLLK	MESLVPGFNEKTHVQLSLPVLQVRDVLVRGFGDSVEEVLSEARQHLKDGTCGLVEVEKGVLPQLEQPYVFIKRSDARTAPHGHVMVELVAELEGIQYGRSGETLGVLVPHVGEIPVAYRKVLLRKNGNKGAGGHSYGADLKSFDLGDELGTDPYEDFQENWNTKHSSGVTRELMRELNGGAYTRYVDNNFCGPDGYPLECIKDLLARAGKASCTLSEQLDFIDTKRGVYCCREHEHEIAWYTERSEKSYELQTPFEIKLAKKFDTFNGECPNFVFPLNSIIKTIQPRVEKKKLDGFMGRIRSVYPVASPNECNQMCLSTLMKCDHCGETSWQTGDFVKATCEFCGTENLTKEGATTCGYLPQNAVVKIYCPACHNSEVGPEHSLAEYHNESGLKTILRK…	mRNA#13684_1_copies:polyA_is_-1 coordinates are BetaCoV/England/02/2020; mRNA#35742_1_copies:polyA_is_-1 coordinates are BetaCoV/England/02/2020; mRNA#18463_1_copies:polyA_is_-1 coordinates are BetaCoV/England/02/2020; mRNA#43928_1_copies:polyA_is_-1 coordinates are BetaCoV/England/02/2020; mRNA#20659_1_copies:polyA_is_-1 coordinates are BetaCoV/England/02/2020; mRNA#16482_1_copies:polyA_is_-1 co…
SARS2_ORF1a	3	1125	1132	GEDIQLLK	MESLVPGFNEKTHVQLSLPVLQVRDVLVRGFGDSVEEVLSEARQHLKDGTCGLVEVEKGVLPQLEQPYVFIKRSDARTAPHGHVMVELVAELEGIQYGRSGETLGVLVPHVGEIPVAYRKVLLRKNGNKGAGGHSYGADLKSFDLGDELGTDPYEDFQENWNTKHSSGVTRELMRELNGGAYTRYVDNNFCGPDGYPLECIKDLLARAGKASCTLSEQLDFIDTKRGVYCCREHEHEIAWYTERSEKSYELQTPFEIKLAKKFDTFNGECPNFVFPLNSIIKTIQPRVEKKKLDGFMGRIRSVYPVASPNECNQMCLSTLMKCDHCGETSWQTGDFVKATCEFCGTENLTKEGATTCGYLPQNAVVKIYCPACHNSEVGPEHSLAEYHNESGLKTILRK…	mRNA#13684_1_copies:polyA_is_-1 coordinates are BetaCoV/England/02/2020; mRNA#35742_1_copies:polyA_is_-1 coordinates are BetaCoV/England/02/2020; mRNA#18463_1_copies:polyA_is_-1 coordinates are BetaCoV/England/02/2020; mRNA#43928_1_copies:polyA_is_-1 coordinates are BetaCoV/England/02/2020; mRNA#20659_1_copies:polyA_is_-1 coordinates are BetaCoV/England/02/2020; mRNA#16482_1_copies:polyA_is_-1 co…
SARS2_ORF1a	8	1133	1163	SAYENFNQHEVLLAPLLSAGIFGADPIHSLR	MESLVPGFNEKTHVQLSLPVLQVRDVLVRGFGDSVEEVLSEARQHLKDGTCGLVEVEKGVLPQLEQPYVFIKRSDARTAPHGHVMVELVAELEGIQYGRSGETLGVLVPHVGEIPVAYRKVLLRKNGNKGAGGHSYGADLKSFDLGDELGTDPYEDFQENWNTKHSSGVTRELMRELNGGAYTRYVDNNFCGPDGYPLECIKDLLARAGKASCTLSEQLDFIDTKRGVYCCREHEHEIAWYTERSEKSYELQTPFEIKLAKKFDTFNGECPNFVFPLNSIIKTIQPRVEKKKLDGFMGRIRSVYPVASPNECNQMCLSTLMKCDHCGETSWQTGDFVKATCEFCGTENLTKEGATTCGYLPQNAVVKIYCPACHNSEVGPEHSLAEYHNESGLKTILRK…	mRNA#13684_1_copies:polyA_is_-1 coordinates are BetaCoV/England/02/2020; mRNA#35742_1_copies:polyA_is_-1 coordinates are BetaCoV/England/02/2020; mRNA#18463_1_copies:polyA_is_-1 coordinates are BetaCoV/England/02/2020; mRNA#43928_1_copies:polyA_is_-1 coordinates are BetaCoV/England/02/2020; mRNA#20659_1_copies:polyA_is_-1 coordinates are BetaCoV/England/02/2020; mRNA#16482_1_copies:polyA_is_-1 co…
SARS2_ORF1a	3	1164	1170	VCVDTVR	MESLVPGFNEKTHVQLSLPVLQVRDVLVRGFGDSVEEVLSEARQHLKDGTCGLVEVEKGVLPQLEQPYVFIKRSDARTAPHGHVMVELVAELEGIQYGRSGETLGVLVPHVGEIPVAYRKVLLRKNGNKGAGGHSYGADLKSFDLGDELGTDPYEDFQENWNTKHSSGVTRELMRELNGGAYTRYVDNNFCGPDGYPLECIKDLLARAGKASCTLSEQLDFIDTKRGVYCCREHEHEIAWYTERSEKSYELQTPFEIKLAKKFDTFNGECPNFVFPLNSIIKTIQPRVEKKKLDGFMGRIRSVYPVASPNECNQMCLSTLMKCDHCGETSWQTGDFVKATCEFCGTENLTKEGATTCGYLPQNAVVKIYCPACHNSEVGPEHSLAEYHNESGLKTILRK…	mRNA#13684_1_copies:polyA_is_-1 coordinates are BetaCoV/England/02/2020; mRNA#35742_1_copies:polyA_is_-1 coordinates are BetaCoV/England/02/2020; mRNA#18463_1_copies:polyA_is_-1 coordinates are BetaCoV/England/02/2020; mRNA#43928_1_copies:polyA_is_-1 coordinates are BetaCoV/England/02/2020; mRNA#20659_1_copies:polyA_is_-1 coordinates are BetaCoV/England/02/2020; mRNA#16482_1_copies:polyA_is_-1 co…
SARS2_ORF1a	6	1171	1180	TNVYLAVFDK	MESLVPGFNEKTHVQLSLPVLQVRDVLVRGFGDSVEEVLSEARQHLKDGTCGLVEVEKGVLPQLEQPYVFIKRSDARTAPHGHVMVELVAELEGIQYGRSGETLGVLVPHVGEIPVAYRKVLLRKNGNKGAGGHSYGADLKSFDLGDELGTDPYEDFQENWNTKHSSGVTRELMRELNGGAYTRYVDNNFCGPDGYPLECIKDLLARAGKASCTLSEQLDFIDTKRGVYCCREHEHEIAWYTERSEKSYELQTPFEIKLAKKFDTFNGECPNFVFPLNSIIKTIQPRVEKKKLDGFMGRIRSVYPVASPNECNQMCLSTLMKCDHCGETSWQTGDFVKATCEFCGTENLTKEGATTCGYLPQNAVVKIYCPACHNSEVGPEHSLAEYHNESGLKTILRK…	mRNA#13684_1_copies:polyA_is_-1 coordinates are BetaCoV/England/02/2020; mRNA#35742_1_copies:polyA_is_-1 coordinates are BetaCoV/England/02/2020; mRNA#18463_1_copies:polyA_is_-1 coordinates are BetaCoV/England/02/2020; mRNA#43928_1_copies:polyA_is_-1 coordinates are BetaCoV/England/02/2020; mRNA#20659_1_copies:polyA_is_-1 coordinates are BetaCoV/England/02/2020; mRNA#16482_1_copies:polyA_is_-1 co…
SARS2_ORF1a	2	1171	1185	TNVYLAVFDKNLYDK	MESLVPGFNEKTHVQLSLPVLQVRDVLVRGFGDSVEEVLSEARQHLKDGTCGLVEVEKGVLPQLEQPYVFIKRSDARTAPHGHVMVELVAELEGIQYGRSGETLGVLVPHVGEIPVAYRKVLLRKNGNKGAGGHSYGADLKSFDLGDELGTDPYEDFQENWNTKHSSGVTRELMRELNGGAYTRYVDNNFCGPDGYPLECIKDLLARAGKASCTLSEQLDFIDTKRGVYCCREHEHEIAWYTERSEKSYELQTPFEIKLAKKFDTFNGECPNFVFPLNSIIKTIQPRVEKKKLDGFMGRIRSVYPVASPNECNQMCLSTLMKCDHCGETSWQTGDFVKATCEFCGTENLTKEGATTCGYLPQNAVVKIYCPACHNSEVGPEHSLAEYHNESGLKTILRK…	mRNA#13684_1_copies:polyA_is_-1 coordinates are BetaCoV/England/02/2020; mRNA#35742_1_copies:polyA_is_-1 coordinates are BetaCoV/England/02/2020; mRNA#18463_1_copies:polyA_is_-1 coordinates are BetaCoV/England/02/2020; mRNA#43928_1_copies:polyA_is_-1 coordinates are BetaCoV/England/02/2020; mRNA#20659_1_copies:polyA_is_-1 coordinates are BetaCoV/England/02/2020; mRNA#16482_1_copies:polyA_is_-1 co…
SARS2_ORF1a	6	1181	1194	NLYDKLVSSFLEMK	MESLVPGFNEKTHVQLSLPVLQVRDVLVRGFGDSVEEVLSEARQHLKDGTCGLVEVEKGVLPQLEQPYVFIKRSDARTAPHGHVMVELVAELEGIQYGRSGETLGVLVPHVGEIPVAYRKVLLRKNGNKGAGGHSYGADLKSFDLGDELGTDPYEDFQENWNTKHSSGVTRELMRELNGGAYTRYVDNNFCGPDGYPLECIKDLLARAGKASCTLSEQLDFIDTKRGVYCCREHEHEIAWYTERSEKSYELQTPFEIKLAKKFDTFNGECPNFVFPLNSIIKTIQPRVEKKKLDGFMGRIRSVYPVASPNECNQMCLSTLMKCDHCGETSWQTGDFVKATCEFCGTENLTKEGATTCGYLPQNAVVKIYCPACHNSEVGPEHSLAEYHNESGLKTILRK…	mRNA#13684_1_copies:polyA_is_-1 coordinates are BetaCoV/England/02/2020; mRNA#35742_1_copies:polyA_is_-1 coordinates are BetaCoV/England/02/2020; mRNA#18463_1_copies:polyA_is_-1 coordinates are BetaCoV/England/02/2020; mRNA#43928_1_copies:polyA_is_-1 coordinates are BetaCoV/England/02/2020; mRNA#20659_1_copies:polyA_is_-1 coordinates are BetaCoV/England/02/2020; mRNA#16482_1_copies:polyA_is_-1 co…
SARS2_ORF1a	18	1186	1194	LVSSFLEMK	MESLVPGFNEKTHVQLSLPVLQVRDVLVRGFGDSVEEVLSEARQHLKDGTCGLVEVEKGVLPQLEQPYVFIKRSDARTAPHGHVMVELVAELEGIQYGRSGETLGVLVPHVGEIPVAYRKVLLRKNGNKGAGGHSYGADLKSFDLGDELGTDPYEDFQENWNTKHSSGVTRELMRELNGGAYTRYVDNNFCGPDGYPLECIKDLLARAGKASCTLSEQLDFIDTKRGVYCCREHEHEIAWYTERSEKSYELQTPFEIKLAKKFDTFNGECPNFVFPLNSIIKTIQPRVEKKKLDGFMGRIRSVYPVASPNECNQMCLSTLMKCDHCGETSWQTGDFVKATCEFCGTENLTKEGATTCGYLPQNAVVKIYCPACHNSEVGPEHSLAEYHNESGLKTILRK…	mRNA#13684_1_copies:polyA_is_-1 coordinates are BetaCoV/England/02/2020; mRNA#35742_1_copies:polyA_is_-1 coordinates are BetaCoV/England/02/2020; mRNA#18463_1_copies:polyA_is_-1 coordinates are BetaCoV/England/02/2020; mRNA#43928_1_copies:polyA_is_-1 coordinates are BetaCoV/England/02/2020; mRNA#20659_1_copies:polyA_is_-1 coordinates are BetaCoV/England/02/2020; mRNA#16482_1_copies:polyA_is_-1 co…
SARS2_ORF1a	27	1203	1225	IAEIPKEEVKPFITESKPSVEQR	MESLVPGFNEKTHVQLSLPVLQVRDVLVRGFGDSVEEVLSEARQHLKDGTCGLVEVEKGVLPQLEQPYVFIKRSDARTAPHGHVMVELVAELEGIQYGRSGETLGVLVPHVGEIPVAYRKVLLRKNGNKGAGGHSYGADLKSFDLGDELGTDPYEDFQENWNTKHSSGVTRELMRELNGGAYTRYVDNNFCGPDGYPLECIKDLLARAGKASCTLSEQLDFIDTKRGVYCCREHEHEIAWYTERSEKSYELQTPFEIKLAKKFDTFNGECPNFVFPLNSIIKTIQPRVEKKKLDGFMGRIRSVYPVASPNECNQMCLSTLMKCDHCGETSWQTGDFVKATCEFCGTENLTKEGATTCGYLPQNAVVKIYCPACHNSEVGPEHSLAEYHNESGLKTILRK…	mRNA#13684_1_copies:polyA_is_-1 coordinates are BetaCoV/England/02/2020; mRNA#35742_1_copies:polyA_is_-1 coordinates are BetaCoV/England/02/2020; mRNA#26849_1_copies:polyA_is_-1 coordinates are BetaCoV/England/02/2020; mRNA#18463_1_copies:polyA_is_-1 coordinates are BetaCoV/England/02/2020; mRNA#43928_1_copies:polyA_is_-1 coordinates are BetaCoV/England/02/2020; mRNA#20659_1_copies:polyA_is_-1 co…
SARS2_ORF1a	10	1209	1225	EEVKPFITESKPSVEQR	MESLVPGFNEKTHVQLSLPVLQVRDVLVRGFGDSVEEVLSEARQHLKDGTCGLVEVEKGVLPQLEQPYVFIKRSDARTAPHGHVMVELVAELEGIQYGRSGETLGVLVPHVGEIPVAYRKVLLRKNGNKGAGGHSYGADLKSFDLGDELGTDPYEDFQENWNTKHSSGVTRELMRELNGGAYTRYVDNNFCGPDGYPLECIKDLLARAGKASCTLSEQLDFIDTKRGVYCCREHEHEIAWYTERSEKSYELQTPFEIKLAKKFDTFNGECPNFVFPLNSIIKTIQPRVEKKKLDGFMGRIRSVYPVASPNECNQMCLSTLMKCDHCGETSWQTGDFVKATCEFCGTENLTKEGATTCGYLPQNAVVKIYCPACHNSEVGPEHSLAEYHNESGLKTILRK…	mRNA#13684_1_copies:polyA_is_-1 coordinates are BetaCoV/England/02/2020; mRNA#35742_1_copies:polyA_is_-1 coordinates are BetaCoV/England/02/2020; mRNA#26849_1_copies:polyA_is_-1 coordinates are BetaCoV/England/02/2020; mRNA#18463_1_copies:polyA_is_-1 coordinates are BetaCoV/England/02/2020; mRNA#43928_1_copies:polyA_is_-1 coordinates are BetaCoV/England/02/2020; mRNA#20659_1_copies:polyA_is_-1 co…
SARS2_ORF1a	12	1234	1247	ACVEEVTTTLEETK	MESLVPGFNEKTHVQLSLPVLQVRDVLVRGFGDSVEEVLSEARQHLKDGTCGLVEVEKGVLPQLEQPYVFIKRSDARTAPHGHVMVELVAELEGIQYGRSGETLGVLVPHVGEIPVAYRKVLLRKNGNKGAGGHSYGADLKSFDLGDELGTDPYEDFQENWNTKHSSGVTRELMRELNGGAYTRYVDNNFCGPDGYPLECIKDLLARAGKASCTLSEQLDFIDTKRGVYCCREHEHEIAWYTERSEKSYELQTPFEIKLAKKFDTFNGECPNFVFPLNSIIKTIQPRVEKKKLDGFMGRIRSVYPVASPNECNQMCLSTLMKCDHCGETSWQTGDFVKATCEFCGTENLTKEGATTCGYLPQNAVVKIYCPACHNSEVGPEHSLAEYHNESGLKTILRK…	mRNA#13684_1_copies:polyA_is_-1 coordinates are BetaCoV/England/02/2020; mRNA#35742_1_copies:polyA_is_-1 coordinates are BetaCoV/England/02/2020; mRNA#26849_1_copies:polyA_is_-1 coordinates are BetaCoV/England/02/2020; mRNA#18463_1_copies:polyA_is_-1 coordinates are BetaCoV/England/02/2020; mRNA#43928_1_copies:polyA_is_-1 coordinates are BetaCoV/England/02/2020; mRNA#20659_1_copies:polyA_is_-1 co…
SARS2_ORF1a	2	1281	1305	KDAPYIVGDVVQEGVLTAVVIPTKK	MESLVPGFNEKTHVQLSLPVLQVRDVLVRGFGDSVEEVLSEARQHLKDGTCGLVEVEKGVLPQLEQPYVFIKRSDARTAPHGHVMVELVAELEGIQYGRSGETLGVLVPHVGEIPVAYRKVLLRKNGNKGAGGHSYGADLKSFDLGDELGTDPYEDFQENWNTKHSSGVTRELMRELNGGAYTRYVDNNFCGPDGYPLECIKDLLARAGKASCTLSEQLDFIDTKRGVYCCREHEHEIAWYTERSEKSYELQTPFEIKLAKKFDTFNGECPNFVFPLNSIIKTIQPRVEKKKLDGFMGRIRSVYPVASPNECNQMCLSTLMKCDHCGETSWQTGDFVKATCEFCGTENLTKEGATTCGYLPQNAVVKIYCPACHNSEVGPEHSLAEYHNESGLKTILRK…	mRNA#13684_1_copies:polyA_is_-1 coordinates are BetaCoV/England/02/2020; mRNA#50272_1_copies:polyA_is_-1 coordinates are BetaCoV/England/02/2020; mRNA#35742_1_copies:polyA_is_-1 coordinates are BetaCoV/England/02/2020; mRNA#26849_1_copies:polyA_is_-1 coordinates are BetaCoV/England/02/2020; mRNA#18463_1_copies:polyA_is_-1 coordinates are BetaCoV/England/02/2020; mRNA#43928_1_copies:polyA_is_-1 co…
SARS2_ORF1a	12	1282	1304	DAPYIVGDVVQEGVLTAVVIPTK	MESLVPGFNEKTHVQLSLPVLQVRDVLVRGFGDSVEEVLSEARQHLKDGTCGLVEVEKGVLPQLEQPYVFIKRSDARTAPHGHVMVELVAELEGIQYGRSGETLGVLVPHVGEIPVAYRKVLLRKNGNKGAGGHSYGADLKSFDLGDELGTDPYEDFQENWNTKHSSGVTRELMRELNGGAYTRYVDNNFCGPDGYPLECIKDLLARAGKASCTLSEQLDFIDTKRGVYCCREHEHEIAWYTERSEKSYELQTPFEIKLAKKFDTFNGECPNFVFPLNSIIKTIQPRVEKKKLDGFMGRIRSVYPVASPNECNQMCLSTLMKCDHCGETSWQTGDFVKATCEFCGTENLTKEGATTCGYLPQNAVVKIYCPACHNSEVGPEHSLAEYHNESGLKTILRK…	mRNA#13684_1_copies:polyA_is_-1 coordinates are BetaCoV/England/02/2020; mRNA#50272_1_copies:polyA_is_-1 coordinates are BetaCoV/England/02/2020; mRNA#35742_1_copies:polyA_is_-1 coordinates are BetaCoV/England/02/2020; mRNA#26849_1_copies:polyA_is_-1 coordinates are BetaCoV/England/02/2020; mRNA#18463_1_copies:polyA_is_-1 coordinates are BetaCoV/England/02/2020; mRNA#43928_1_copies:polyA_is_-1 co…
SARS2_ORF1a	21	1282	1305	DAPYIVGDVVQEGVLTAVVIPTKK	MESLVPGFNEKTHVQLSLPVLQVRDVLVRGFGDSVEEVLSEARQHLKDGTCGLVEVEKGVLPQLEQPYVFIKRSDARTAPHGHVMVELVAELEGIQYGRSGETLGVLVPHVGEIPVAYRKVLLRKNGNKGAGGHSYGADLKSFDLGDELGTDPYEDFQENWNTKHSSGVTRELMRELNGGAYTRYVDNNFCGPDGYPLECIKDLLARAGKASCTLSEQLDFIDTKRGVYCCREHEHEIAWYTERSEKSYELQTPFEIKLAKKFDTFNGECPNFVFPLNSIIKTIQPRVEKKKLDGFMGRIRSVYPVASPNECNQMCLSTLMKCDHCGETSWQTGDFVKATCEFCGTENLTKEGATTCGYLPQNAVVKIYCPACHNSEVGPEHSLAEYHNESGLKTILRK…	mRNA#13684_1_copies:polyA_is_-1 coordinates are BetaCoV/England/02/2020; mRNA#50272_1_copies:polyA_is_-1 coordinates are BetaCoV/England/02/2020; mRNA#35742_1_copies:polyA_is_-1 coordinates are BetaCoV/England/02/2020; mRNA#26849_1_copies:polyA_is_-1 coordinates are BetaCoV/England/02/2020; mRNA#18463_1_copies:polyA_is_-1 coordinates are BetaCoV/England/02/2020; mRNA#43928_1_copies:polyA_is_-1 co…
SARS2_ORF1a	1	1305	1315	KAGGTTEMLAK	MESLVPGFNEKTHVQLSLPVLQVRDVLVRGFGDSVEEVLSEARQHLKDGTCGLVEVEKGVLPQLEQPYVFIKRSDARTAPHGHVMVELVAELEGIQYGRSGETLGVLVPHVGEIPVAYRKVLLRKNGNKGAGGHSYGADLKSFDLGDELGTDPYEDFQENWNTKHSSGVTRELMRELNGGAYTRYVDNNFCGPDGYPLECIKDLLARAGKASCTLSEQLDFIDTKRGVYCCREHEHEIAWYTERSEKSYELQTPFEIKLAKKFDTFNGECPNFVFPLNSIIKTIQPRVEKKKLDGFMGRIRSVYPVASPNECNQMCLSTLMKCDHCGETSWQTGDFVKATCEFCGTENLTKEGATTCGYLPQNAVVKIYCPACHNSEVGPEHSLAEYHNESGLKTILRK…	mRNA#13684_1_copies:polyA_is_-1 coordinates are BetaCoV/England/02/2020; mRNA#50272_1_copies:polyA_is_-1 coordinates are BetaCoV/England/02/2020; mRNA#35742_1_copies:polyA_is_-1 coordinates are BetaCoV/England/02/2020; mRNA#26849_1_copies:polyA_is_-1 coordinates are BetaCoV/England/02/2020; mRNA#18463_1_copies:polyA_is_-1 coordinates are BetaCoV/England/02/2020; mRNA#43928_1_copies:polyA_is_-1 co…
SARS2_ORF1a	22	1306	1315	AGGTTEMLAK	MESLVPGFNEKTHVQLSLPVLQVRDVLVRGFGDSVEEVLSEARQHLKDGTCGLVEVEKGVLPQLEQPYVFIKRSDARTAPHGHVMVELVAELEGIQYGRSGETLGVLVPHVGEIPVAYRKVLLRKNGNKGAGGHSYGADLKSFDLGDELGTDPYEDFQENWNTKHSSGVTRELMRELNGGAYTRYVDNNFCGPDGYPLECIKDLLARAGKASCTLSEQLDFIDTKRGVYCCREHEHEIAWYTERSEKSYELQTPFEIKLAKKFDTFNGECPNFVFPLNSIIKTIQPRVEKKKLDGFMGRIRSVYPVASPNECNQMCLSTLMKCDHCGETSWQTGDFVKATCEFCGTENLTKEGATTCGYLPQNAVVKIYCPACHNSEVGPEHSLAEYHNESGLKTILRK…	mRNA#13684_1_copies:polyA_is_-1 coordinates are BetaCoV/England/02/2020; mRNA#50272_1_copies:polyA_is_-1 coordinates are BetaCoV/England/02/2020; mRNA#35742_1_copies:polyA_is_-1 coordinates are BetaCoV/England/02/2020; mRNA#26849_1_copies:polyA_is_-1 coordinates are BetaCoV/England/02/2020; mRNA#18463_1_copies:polyA_is_-1 coordinates are BetaCoV/England/02/2020; mRNA#43928_1_copies:polyA_is_-1 co…
SARS2_ORF1a	11	1319	1343	KVPTDNYITTYPGQGLNGYTVEEAK	MESLVPGFNEKTHVQLSLPVLQVRDVLVRGFGDSVEEVLSEARQHLKDGTCGLVEVEKGVLPQLEQPYVFIKRSDARTAPHGHVMVELVAELEGIQYGRSGETLGVLVPHVGEIPVAYRKVLLRKNGNKGAGGHSYGADLKSFDLGDELGTDPYEDFQENWNTKHSSGVTRELMRELNGGAYTRYVDNNFCGPDGYPLECIKDLLARAGKASCTLSEQLDFIDTKRGVYCCREHEHEIAWYTERSEKSYELQTPFEIKLAKKFDTFNGECPNFVFPLNSIIKTIQPRVEKKKLDGFMGRIRSVYPVASPNECNQMCLSTLMKCDHCGETSWQTGDFVKATCEFCGTENLTKEGATTCGYLPQNAVVKIYCPACHNSEVGPEHSLAEYHNESGLKTILRK…	mRNA#13684_1_copies:polyA_is_-1 coordinates are BetaCoV/England/02/2020; mRNA#35742_1_copies:polyA_is_-1 coordinates are BetaCoV/England/02/2020; mRNA#18463_1_copies:polyA_is_-1 coordinates are BetaCoV/England/02/2020; mRNA#20659_1_copies:polyA_is_-1 coordinates are BetaCoV/England/02/2020; mRNA#16482_1_copies:polyA_is_-1 coordinates are BetaCoV/England/02/2020; mRNA#40696_1_copies:polyA_is_-1 co…
SARS2_ORF1a	13	1320	1343	VPTDNYITTYPGQGLNGYTVEEAK	MESLVPGFNEKTHVQLSLPVLQVRDVLVRGFGDSVEEVLSEARQHLKDGTCGLVEVEKGVLPQLEQPYVFIKRSDARTAPHGHVMVELVAELEGIQYGRSGETLGVLVPHVGEIPVAYRKVLLRKNGNKGAGGHSYGADLKSFDLGDELGTDPYEDFQENWNTKHSSGVTRELMRELNGGAYTRYVDNNFCGPDGYPLECIKDLLARAGKASCTLSEQLDFIDTKRGVYCCREHEHEIAWYTERSEKSYELQTPFEIKLAKKFDTFNGECPNFVFPLNSIIKTIQPRVEKKKLDGFMGRIRSVYPVASPNECNQMCLSTLMKCDHCGETSWQTGDFVKATCEFCGTENLTKEGATTCGYLPQNAVVKIYCPACHNSEVGPEHSLAEYHNESGLKTILRK…	mRNA#13684_1_copies:polyA_is_-1 coordinates are BetaCoV/England/02/2020; mRNA#35742_1_copies:polyA_is_-1 coordinates are BetaCoV/England/02/2020; mRNA#18463_1_copies:polyA_is_-1 coordinates are BetaCoV/England/02/2020; mRNA#20659_1_copies:polyA_is_-1 coordinates are BetaCoV/England/02/2020; mRNA#16482_1_copies:polyA_is_-1 coordinates are BetaCoV/England/02/2020; mRNA#40696_1_copies:polyA_is_-1 co…
SARS2_ORF1a	13	1351	1364	SAFYILPSIISNEK	MESLVPGFNEKTHVQLSLPVLQVRDVLVRGFGDSVEEVLSEARQHLKDGTCGLVEVEKGVLPQLEQPYVFIKRSDARTAPHGHVMVELVAELEGIQYGRSGETLGVLVPHVGEIPVAYRKVLLRKNGNKGAGGHSYGADLKSFDLGDELGTDPYEDFQENWNTKHSSGVTRELMRELNGGAYTRYVDNNFCGPDGYPLECIKDLLARAGKASCTLSEQLDFIDTKRGVYCCREHEHEIAWYTERSEKSYELQTPFEIKLAKKFDTFNGECPNFVFPLNSIIKTIQPRVEKKKLDGFMGRIRSVYPVASPNECNQMCLSTLMKCDHCGETSWQTGDFVKATCEFCGTENLTKEGATTCGYLPQNAVVKIYCPACHNSEVGPEHSLAEYHNESGLKTILRK…	mRNA#13684_1_copies:polyA_is_-1 coordinates are BetaCoV/England/02/2020; mRNA#35742_1_copies:polyA_is_-1 coordinates are BetaCoV/England/02/2020; mRNA#18463_1_copies:polyA_is_-1 coordinates are BetaCoV/England/02/2020; mRNA#20659_1_copies:polyA_is_-1 coordinates are BetaCoV/England/02/2020; mRNA#16482_1_copies:polyA_is_-1 coordinates are BetaCoV/England/02/2020; mRNA#40696_1_copies:polyA_is_-1 co…
SARS2_ORF1a	6	1365	1376	QEILGTVSWNLR	MESLVPGFNEKTHVQLSLPVLQVRDVLVRGFGDSVEEVLSEARQHLKDGTCGLVEVEKGVLPQLEQPYVFIKRSDARTAPHGHVMVELVAELEGIQYGRSGETLGVLVPHVGEIPVAYRKVLLRKNGNKGAGGHSYGADLKSFDLGDELGTDPYEDFQENWNTKHSSGVTRELMRELNGGAYTRYVDNNFCGPDGYPLECIKDLLARAGKASCTLSEQLDFIDTKRGVYCCREHEHEIAWYTERSEKSYELQTPFEIKLAKKFDTFNGECPNFVFPLNSIIKTIQPRVEKKKLDGFMGRIRSVYPVASPNECNQMCLSTLMKCDHCGETSWQTGDFVKATCEFCGTENLTKEGATTCGYLPQNAVVKIYCPACHNSEVGPEHSLAEYHNESGLKTILRK…	mRNA#13684_1_copies:polyA_is_-1 coordinates are BetaCoV/England/02/2020; mRNA#35742_1_copies:polyA_is_-1 coordinates are BetaCoV/England/02/2020; mRNA#18463_1_copies:polyA_is_-1 coordinates are BetaCoV/England/02/2020; mRNA#20659_1_copies:polyA_is_-1 coordinates are BetaCoV/England/02/2020; mRNA#16482_1_copies:polyA_is_-1 coordinates are BetaCoV/England/02/2020; mRNA#40696_1_copies:polyA_is_-1 co…
SARS2_ORF1a	24	1377	1386	EMLAHAEETR	MESLVPGFNEKTHVQLSLPVLQVRDVLVRGFGDSVEEVLSEARQHLKDGTCGLVEVEKGVLPQLEQPYVFIKRSDARTAPHGHVMVELVAELEGIQYGRSGETLGVLVPHVGEIPVAYRKVLLRKNGNKGAGGHSYGADLKSFDLGDELGTDPYEDFQENWNTKHSSGVTRELMRELNGGAYTRYVDNNFCGPDGYPLECIKDLLARAGKASCTLSEQLDFIDTKRGVYCCREHEHEIAWYTERSEKSYELQTPFEIKLAKKFDTFNGECPNFVFPLNSIIKTIQPRVEKKKLDGFMGRIRSVYPVASPNECNQMCLSTLMKCDHCGETSWQTGDFVKATCEFCGTENLTKEGATTCGYLPQNAVVKIYCPACHNSEVGPEHSLAEYHNESGLKTILRK…	mRNA#13684_1_copies:polyA_is_-1 coordinates are BetaCoV/England/02/2020; mRNA#35742_1_copies:polyA_is_-1 coordinates are BetaCoV/England/02/2020; mRNA#18463_1_copies:polyA_is_-1 coordinates are BetaCoV/England/02/2020; mRNA#20659_1_copies:polyA_is_-1 coordinates are BetaCoV/England/02/2020; mRNA#16482_1_copies:polyA_is_-1 coordinates are BetaCoV/England/02/2020; mRNA#40696_1_copies:polyA_is_-1 co…
SARS2_ORF1a	8	1377	1387	EMLAHAEETRK	MESLVPGFNEKTHVQLSLPVLQVRDVLVRGFGDSVEEVLSEARQHLKDGTCGLVEVEKGVLPQLEQPYVFIKRSDARTAPHGHVMVELVAELEGIQYGRSGETLGVLVPHVGEIPVAYRKVLLRKNGNKGAGGHSYGADLKSFDLGDELGTDPYEDFQENWNTKHSSGVTRELMRELNGGAYTRYVDNNFCGPDGYPLECIKDLLARAGKASCTLSEQLDFIDTKRGVYCCREHEHEIAWYTERSEKSYELQTPFEIKLAKKFDTFNGECPNFVFPLNSIIKTIQPRVEKKKLDGFMGRIRSVYPVASPNECNQMCLSTLMKCDHCGETSWQTGDFVKATCEFCGTENLTKEGATTCGYLPQNAVVKIYCPACHNSEVGPEHSLAEYHNESGLKTILRK…	mRNA#13684_1_copies:polyA_is_-1 coordinates are BetaCoV/England/02/2020; mRNA#35742_1_copies:polyA_is_-1 coordinates are BetaCoV/England/02/2020; mRNA#18463_1_copies:polyA_is_-1 coordinates are BetaCoV/England/02/2020; mRNA#20659_1_copies:polyA_is_-1 coordinates are BetaCoV/England/02/2020; mRNA#16482_1_copies:polyA_is_-1 coordinates are BetaCoV/England/02/2020; mRNA#40696_1_copies:polyA_is_-1 co…
SARS2_ORF1a	14	1387	1396	KLMPVCVETK	MESLVPGFNEKTHVQLSLPVLQVRDVLVRGFGDSVEEVLSEARQHLKDGTCGLVEVEKGVLPQLEQPYVFIKRSDARTAPHGHVMVELVAELEGIQYGRSGETLGVLVPHVGEIPVAYRKVLLRKNGNKGAGGHSYGADLKSFDLGDELGTDPYEDFQENWNTKHSSGVTRELMRELNGGAYTRYVDNNFCGPDGYPLECIKDLLARAGKASCTLSEQLDFIDTKRGVYCCREHEHEIAWYTERSEKSYELQTPFEIKLAKKFDTFNGECPNFVFPLNSIIKTIQPRVEKKKLDGFMGRIRSVYPVASPNECNQMCLSTLMKCDHCGETSWQTGDFVKATCEFCGTENLTKEGATTCGYLPQNAVVKIYCPACHNSEVGPEHSLAEYHNESGLKTILRK…	mRNA#13684_1_copies:polyA_is_-1 coordinates are BetaCoV/England/02/2020; mRNA#35742_1_copies:polyA_is_-1 coordinates are BetaCoV/England/02/2020; mRNA#18463_1_copies:polyA_is_-1 coordinates are BetaCoV/England/02/2020; mRNA#20659_1_copies:polyA_is_-1 coordinates are BetaCoV/England/02/2020; mRNA#16482_1_copies:polyA_is_-1 coordinates are BetaCoV/England/02/2020; mRNA#40696_1_copies:polyA_is_-1 co…
SARS2_ORF1a	12	1388	1396	LMPVCVETK	MESLVPGFNEKTHVQLSLPVLQVRDVLVRGFGDSVEEVLSEARQHLKDGTCGLVEVEKGVLPQLEQPYVFIKRSDARTAPHGHVMVELVAELEGIQYGRSGETLGVLVPHVGEIPVAYRKVLLRKNGNKGAGGHSYGADLKSFDLGDELGTDPYEDFQENWNTKHSSGVTRELMRELNGGAYTRYVDNNFCGPDGYPLECIKDLLARAGKASCTLSEQLDFIDTKRGVYCCREHEHEIAWYTERSEKSYELQTPFEIKLAKKFDTFNGECPNFVFPLNSIIKTIQPRVEKKKLDGFMGRIRSVYPVASPNECNQMCLSTLMKCDHCGETSWQTGDFVKATCEFCGTENLTKEGATTCGYLPQNAVVKIYCPACHNSEVGPEHSLAEYHNESGLKTILRK…	mRNA#13684_1_copies:polyA_is_-1 coordinates are BetaCoV/England/02/2020; mRNA#35742_1_copies:polyA_is_-1 coordinates are BetaCoV/England/02/2020; mRNA#18463_1_copies:polyA_is_-1 coordinates are BetaCoV/England/02/2020; mRNA#20659_1_copies:polyA_is_-1 coordinates are BetaCoV/England/02/2020; mRNA#16482_1_copies:polyA_is_-1 coordinates are BetaCoV/England/02/2020; mRNA#40696_1_copies:polyA_is_-1 co…
SARS2_ORF1a	4	1397	1404	AIVSTIQR	MESLVPGFNEKTHVQLSLPVLQVRDVLVRGFGDSVEEVLSEARQHLKDGTCGLVEVEKGVLPQLEQPYVFIKRSDARTAPHGHVMVELVAELEGIQYGRSGETLGVLVPHVGEIPVAYRKVLLRKNGNKGAGGHSYGADLKSFDLGDELGTDPYEDFQENWNTKHSSGVTRELMRELNGGAYTRYVDNNFCGPDGYPLECIKDLLARAGKASCTLSEQLDFIDTKRGVYCCREHEHEIAWYTERSEKSYELQTPFEIKLAKKFDTFNGECPNFVFPLNSIIKTIQPRVEKKKLDGFMGRIRSVYPVASPNECNQMCLSTLMKCDHCGETSWQTGDFVKATCEFCGTENLTKEGATTCGYLPQNAVVKIYCPACHNSEVGPEHSLAEYHNESGLKTILRK…	mRNA#13684_1_copies:polyA_is_-1 coordinates are BetaCoV/England/02/2020; mRNA#35742_1_copies:polyA_is_-1 coordinates are BetaCoV/England/02/2020; mRNA#18463_1_copies:polyA_is_-1 coordinates are BetaCoV/England/02/2020; mRNA#20659_1_copies:polyA_is_-1 coordinates are BetaCoV/England/02/2020; mRNA#16482_1_copies:polyA_is_-1 coordinates are BetaCoV/England/02/2020; mRNA#40696_1_copies:polyA_is_-1 co…
SARS2_ORF1a	17	1411	1421	IQEGVVDYGAR	MESLVPGFNEKTHVQLSLPVLQVRDVLVRGFGDSVEEVLSEARQHLKDGTCGLVEVEKGVLPQLEQPYVFIKRSDARTAPHGHVMVELVAELEGIQYGRSGETLGVLVPHVGEIPVAYRKVLLRKNGNKGAGGHSYGADLKSFDLGDELGTDPYEDFQENWNTKHSSGVTRELMRELNGGAYTRYVDNNFCGPDGYPLECIKDLLARAGKASCTLSEQLDFIDTKRGVYCCREHEHEIAWYTERSEKSYELQTPFEIKLAKKFDTFNGECPNFVFPLNSIIKTIQPRVEKKKLDGFMGRIRSVYPVASPNECNQMCLSTLMKCDHCGETSWQTGDFVKATCEFCGTENLTKEGATTCGYLPQNAVVKIYCPACHNSEVGPEHSLAEYHNESGLKTILRK…	mRNA#13684_1_copies:polyA_is_-1 coordinates are BetaCoV/England/02/2020; mRNA#35742_1_copies:polyA_is_-1 coordinates are BetaCoV/England/02/2020; mRNA#18463_1_copies:polyA_is_-1 coordinates are BetaCoV/England/02/2020; mRNA#20659_1_copies:polyA_is_-1 coordinates are BetaCoV/England/02/2020; mRNA#16482_1_copies:polyA_is_-1 coordinates are BetaCoV/England/02/2020; mRNA#40696_1_copies:polyA_is_-1 co…
SARS2_ORF1a	11	1422	1428	FYFYTSK	MESLVPGFNEKTHVQLSLPVLQVRDVLVRGFGDSVEEVLSEARQHLKDGTCGLVEVEKGVLPQLEQPYVFIKRSDARTAPHGHVMVELVAELEGIQYGRSGETLGVLVPHVGEIPVAYRKVLLRKNGNKGAGGHSYGADLKSFDLGDELGTDPYEDFQENWNTKHSSGVTRELMRELNGGAYTRYVDNNFCGPDGYPLECIKDLLARAGKASCTLSEQLDFIDTKRGVYCCREHEHEIAWYTERSEKSYELQTPFEIKLAKKFDTFNGECPNFVFPLNSIIKTIQPRVEKKKLDGFMGRIRSVYPVASPNECNQMCLSTLMKCDHCGETSWQTGDFVKATCEFCGTENLTKEGATTCGYLPQNAVVKIYCPACHNSEVGPEHSLAEYHNESGLKTILRK…	mRNA#13684_1_copies:polyA_is_-1 coordinates are BetaCoV/England/02/2020; mRNA#35742_1_copies:polyA_is_-1 coordinates are BetaCoV/England/02/2020; mRNA#18463_1_copies:polyA_is_-1 coordinates are BetaCoV/England/02/2020; mRNA#20659_1_copies:polyA_is_-1 coordinates are BetaCoV/England/02/2020; mRNA#16482_1_copies:polyA_is_-1 coordinates are BetaCoV/England/02/2020; mRNA#34929_1_copies:polyA_is_-1 co…
SARS2_ORF1a	6	1468	1495	SLKVPATVSVSSPDAVTAYNGYLTSSSK	MESLVPGFNEKTHVQLSLPVLQVRDVLVRGFGDSVEEVLSEARQHLKDGTCGLVEVEKGVLPQLEQPYVFIKRSDARTAPHGHVMVELVAELEGIQYGRSGETLGVLVPHVGEIPVAYRKVLLRKNGNKGAGGHSYGADLKSFDLGDELGTDPYEDFQENWNTKHSSGVTRELMRELNGGAYTRYVDNNFCGPDGYPLECIKDLLARAGKASCTLSEQLDFIDTKRGVYCCREHEHEIAWYTERSEKSYELQTPFEIKLAKKFDTFNGECPNFVFPLNSIIKTIQPRVEKKKLDGFMGRIRSVYPVASPNECNQMCLSTLMKCDHCGETSWQTGDFVKATCEFCGTENLTKEGATTCGYLPQNAVVKIYCPACHNSEVGPEHSLAEYHNESGLKTILRK…	mRNA#13684_1_copies:polyA_is_-1 coordinates are BetaCoV/England/02/2020; mRNA#35742_1_copies:polyA_is_-1 coordinates are BetaCoV/England/02/2020; mRNA#18463_1_copies:polyA_is_-1 coordinates are BetaCoV/England/02/2020; mRNA#20659_1_copies:polyA_is_-1 coordinates are BetaCoV/England/02/2020; mRNA#16482_1_copies:polyA_is_-1 coordinates are BetaCoV/England/02/2020; mRNA#34929_1_copies:polyA_is_-1 co…
SARS2_ORF1a	12	1471	1495	VPATVSVSSPDAVTAYNGYLTSSSK	MESLVPGFNEKTHVQLSLPVLQVRDVLVRGFGDSVEEVLSEARQHLKDGTCGLVEVEKGVLPQLEQPYVFIKRSDARTAPHGHVMVELVAELEGIQYGRSGETLGVLVPHVGEIPVAYRKVLLRKNGNKGAGGHSYGADLKSFDLGDELGTDPYEDFQENWNTKHSSGVTRELMRELNGGAYTRYVDNNFCGPDGYPLECIKDLLARAGKASCTLSEQLDFIDTKRGVYCCREHEHEIAWYTERSEKSYELQTPFEIKLAKKFDTFNGECPNFVFPLNSIIKTIQPRVEKKKLDGFMGRIRSVYPVASPNECNQMCLSTLMKCDHCGETSWQTGDFVKATCEFCGTENLTKEGATTCGYLPQNAVVKIYCPACHNSEVGPEHSLAEYHNESGLKTILRK…	mRNA#13684_1_copies:polyA_is_-1 coordinates are BetaCoV/England/02/2020; mRNA#35742_1_copies:polyA_is_-1 coordinates are BetaCoV/England/02/2020; mRNA#18463_1_copies:polyA_is_-1 coordinates are BetaCoV/England/02/2020; mRNA#20659_1_copies:polyA_is_-1 coordinates are BetaCoV/England/02/2020; mRNA#16482_1_copies:polyA_is_-1 coordinates are BetaCoV/England/02/2020; mRNA#34929_1_copies:polyA_is_-1 co…
SARS2_ORF1a	5	1496	1512	TPEEHFIETISLAGSYK	MESLVPGFNEKTHVQLSLPVLQVRDVLVRGFGDSVEEVLSEARQHLKDGTCGLVEVEKGVLPQLEQPYVFIKRSDARTAPHGHVMVELVAELEGIQYGRSGETLGVLVPHVGEIPVAYRKVLLRKNGNKGAGGHSYGADLKSFDLGDELGTDPYEDFQENWNTKHSSGVTRELMRELNGGAYTRYVDNNFCGPDGYPLECIKDLLARAGKASCTLSEQLDFIDTKRGVYCCREHEHEIAWYTERSEKSYELQTPFEIKLAKKFDTFNGECPNFVFPLNSIIKTIQPRVEKKKLDGFMGRIRSVYPVASPNECNQMCLSTLMKCDHCGETSWQTGDFVKATCEFCGTENLTKEGATTCGYLPQNAVVKIYCPACHNSEVGPEHSLAEYHNESGLKTILRK…	mRNA#13684_1_copies:polyA_is_-1 coordinates are BetaCoV/England/02/2020; mRNA#35742_1_copies:polyA_is_-1 coordinates are BetaCoV/England/02/2020; mRNA#18463_1_copies:polyA_is_-1 coordinates are BetaCoV/England/02/2020; mRNA#20659_1_copies:polyA_is_-1 coordinates are BetaCoV/England/02/2020; mRNA#16482_1_copies:polyA_is_-1 coordinates are BetaCoV/England/02/2020; mRNA#34929_1_copies:polyA_is_-1 co…
SARS2_ORF1a	8	1513	1529	DWSYSGQSTQLGIEFLK	MESLVPGFNEKTHVQLSLPVLQVRDVLVRGFGDSVEEVLSEARQHLKDGTCGLVEVEKGVLPQLEQPYVFIKRSDARTAPHGHVMVELVAELEGIQYGRSGETLGVLVPHVGEIPVAYRKVLLRKNGNKGAGGHSYGADLKSFDLGDELGTDPYEDFQENWNTKHSSGVTRELMRELNGGAYTRYVDNNFCGPDGYPLECIKDLLARAGKASCTLSEQLDFIDTKRGVYCCREHEHEIAWYTERSEKSYELQTPFEIKLAKKFDTFNGECPNFVFPLNSIIKTIQPRVEKKKLDGFMGRIRSVYPVASPNECNQMCLSTLMKCDHCGETSWQTGDFVKATCEFCGTENLTKEGATTCGYLPQNAVVKIYCPACHNSEVGPEHSLAEYHNESGLKTILRK…	mRNA#13684_1_copies:polyA_is_-1 coordinates are BetaCoV/England/02/2020; mRNA#35742_1_copies:polyA_is_-1 coordinates are BetaCoV/England/02/2020; mRNA#18463_1_copies:polyA_is_-1 coordinates are BetaCoV/England/02/2020; mRNA#20659_1_copies:polyA_is_-1 coordinates are BetaCoV/England/02/2020; mRNA#16482_1_copies:polyA_is_-1 coordinates are BetaCoV/England/02/2020; mRNA#34929_1_copies:polyA_is_-1 co…
SARS2_ORF1a	4	1534	1557	SVYYTSNPTTFHLDGEVITFDNLK	MESLVPGFNEKTHVQLSLPVLQVRDVLVRGFGDSVEEVLSEARQHLKDGTCGLVEVEKGVLPQLEQPYVFIKRSDARTAPHGHVMVELVAELEGIQYGRSGETLGVLVPHVGEIPVAYRKVLLRKNGNKGAGGHSYGADLKSFDLGDELGTDPYEDFQENWNTKHSSGVTRELMRELNGGAYTRYVDNNFCGPDGYPLECIKDLLARAGKASCTLSEQLDFIDTKRGVYCCREHEHEIAWYTERSEKSYELQTPFEIKLAKKFDTFNGECPNFVFPLNSIIKTIQPRVEKKKLDGFMGRIRSVYPVASPNECNQMCLSTLMKCDHCGETSWQTGDFVKATCEFCGTENLTKEGATTCGYLPQNAVVKIYCPACHNSEVGPEHSLAEYHNESGLKTILRK…	mRNA#13684_1_copies:polyA_is_-1 coordinates are BetaCoV/England/02/2020; mRNA#35742_1_copies:polyA_is_-1 coordinates are BetaCoV/England/02/2020; mRNA#18463_1_copies:polyA_is_-1 coordinates are BetaCoV/England/02/2020; mRNA#20659_1_copies:polyA_is_-1 coordinates are BetaCoV/England/02/2020; mRNA#16482_1_copies:polyA_is_-1 coordinates are BetaCoV/England/02/2020; mRNA#34929_1_copies:polyA_is_-1 co…
SARS2_ORF1a	17	1617	1628	TFYVLPNDDTLR	MESLVPGFNEKTHVQLSLPVLQVRDVLVRGFGDSVEEVLSEARQHLKDGTCGLVEVEKGVLPQLEQPYVFIKRSDARTAPHGHVMVELVAELEGIQYGRSGETLGVLVPHVGEIPVAYRKVLLRKNGNKGAGGHSYGADLKSFDLGDELGTDPYEDFQENWNTKHSSGVTRELMRELNGGAYTRYVDNNFCGPDGYPLECIKDLLARAGKASCTLSEQLDFIDTKRGVYCCREHEHEIAWYTERSEKSYELQTPFEIKLAKKFDTFNGECPNFVFPLNSIIKTIQPRVEKKKLDGFMGRIRSVYPVASPNECNQMCLSTLMKCDHCGETSWQTGDFVKATCEFCGTENLTKEGATTCGYLPQNAVVKIYCPACHNSEVGPEHSLAEYHNESGLKTILRK…	mRNA#13684_1_copies:polyA_is_-1 coordinates are BetaCoV/England/02/2020; mRNA#35742_1_copies:polyA_is_-1 coordinates are BetaCoV/England/02/2020; mRNA#11782_1_copies:polyA_is_-1 coordinates are BetaCoV/England/02/2020; mRNA#18463_1_copies:polyA_is_-1 coordinates are BetaCoV/England/02/2020; mRNA#20659_1_copies:polyA_is_-1 coordinates are BetaCoV/England/02/2020; mRNA#16482_1_copies:polyA_is_-1 co…
SARS2_ORF1a	17	1629	1645	VEAFEYYHTTDPSFLGR	MESLVPGFNEKTHVQLSLPVLQVRDVLVRGFGDSVEEVLSEARQHLKDGTCGLVEVEKGVLPQLEQPYVFIKRSDARTAPHGHVMVELVAELEGIQYGRSGETLGVLVPHVGEIPVAYRKVLLRKNGNKGAGGHSYGADLKSFDLGDELGTDPYEDFQENWNTKHSSGVTRELMRELNGGAYTRYVDNNFCGPDGYPLECIKDLLARAGKASCTLSEQLDFIDTKRGVYCCREHEHEIAWYTERSEKSYELQTPFEIKLAKKFDTFNGECPNFVFPLNSIIKTIQPRVEKKKLDGFMGRIRSVYPVASPNECNQMCLSTLMKCDHCGETSWQTGDFVKATCEFCGTENLTKEGATTCGYLPQNAVVKIYCPACHNSEVGPEHSLAEYHNESGLKTILRK…	mRNA#13684_1_copies:polyA_is_-1 coordinates are BetaCoV/England/02/2020; mRNA#35742_1_copies:polyA_is_-1 coordinates are BetaCoV/England/02/2020; mRNA#11782_1_copies:polyA_is_-1 coordinates are BetaCoV/England/02/2020; mRNA#18463_1_copies:polyA_is_-1 coordinates are BetaCoV/England/02/2020; mRNA#20659_1_copies:polyA_is_-1 coordinates are BetaCoV/England/02/2020; mRNA#16482_1_copies:polyA_is_-1 co…
SARS2_ORF1a	12	1646	1654	YMSALNHTK	MESLVPGFNEKTHVQLSLPVLQVRDVLVRGFGDSVEEVLSEARQHLKDGTCGLVEVEKGVLPQLEQPYVFIKRSDARTAPHGHVMVELVAELEGIQYGRSGETLGVLVPHVGEIPVAYRKVLLRKNGNKGAGGHSYGADLKSFDLGDELGTDPYEDFQENWNTKHSSGVTRELMRELNGGAYTRYVDNNFCGPDGYPLECIKDLLARAGKASCTLSEQLDFIDTKRGVYCCREHEHEIAWYTERSEKSYELQTPFEIKLAKKFDTFNGECPNFVFPLNSIIKTIQPRVEKKKLDGFMGRIRSVYPVASPNECNQMCLSTLMKCDHCGETSWQTGDFVKATCEFCGTENLTKEGATTCGYLPQNAVVKIYCPACHNSEVGPEHSLAEYHNESGLKTILRK…	mRNA#13684_1_copies:polyA_is_-1 coordinates are BetaCoV/England/02/2020; mRNA#35742_1_copies:polyA_is_-1 coordinates are BetaCoV/England/02/2020; mRNA#11782_1_copies:polyA_is_-1 coordinates are BetaCoV/England/02/2020; mRNA#18463_1_copies:polyA_is_-1 coordinates are BetaCoV/England/02/2020; mRNA#20659_1_copies:polyA_is_-1 coordinates are BetaCoV/England/02/2020; mRNA#16482_1_copies:polyA_is_-1 co…
SARS2_ORF1a	9	1656	1668	WKYPQVNGLTSIK	MESLVPGFNEKTHVQLSLPVLQVRDVLVRGFGDSVEEVLSEARQHLKDGTCGLVEVEKGVLPQLEQPYVFIKRSDARTAPHGHVMVELVAELEGIQYGRSGETLGVLVPHVGEIPVAYRKVLLRKNGNKGAGGHSYGADLKSFDLGDELGTDPYEDFQENWNTKHSSGVTRELMRELNGGAYTRYVDNNFCGPDGYPLECIKDLLARAGKASCTLSEQLDFIDTKRGVYCCREHEHEIAWYTERSEKSYELQTPFEIKLAKKFDTFNGECPNFVFPLNSIIKTIQPRVEKKKLDGFMGRIRSVYPVASPNECNQMCLSTLMKCDHCGETSWQTGDFVKATCEFCGTENLTKEGATTCGYLPQNAVVKIYCPACHNSEVGPEHSLAEYHNESGLKTILRK…	mRNA#13684_1_copies:polyA_is_-1 coordinates are BetaCoV/England/02/2020; mRNA#35742_1_copies:polyA_is_-1 coordinates are BetaCoV/England/02/2020; mRNA#11782_1_copies:polyA_is_-1 coordinates are BetaCoV/England/02/2020; mRNA#18463_1_copies:polyA_is_-1 coordinates are BetaCoV/England/02/2020; mRNA#20659_1_copies:polyA_is_-1 coordinates are BetaCoV/England/02/2020; mRNA#16482_1_copies:polyA_is_-1 co…
SARS2_ORF1a	11	1658	1668	YPQVNGLTSIK	MESLVPGFNEKTHVQLSLPVLQVRDVLVRGFGDSVEEVLSEARQHLKDGTCGLVEVEKGVLPQLEQPYVFIKRSDARTAPHGHVMVELVAELEGIQYGRSGETLGVLVPHVGEIPVAYRKVLLRKNGNKGAGGHSYGADLKSFDLGDELGTDPYEDFQENWNTKHSSGVTRELMRELNGGAYTRYVDNNFCGPDGYPLECIKDLLARAGKASCTLSEQLDFIDTKRGVYCCREHEHEIAWYTERSEKSYELQTPFEIKLAKKFDTFNGECPNFVFPLNSIIKTIQPRVEKKKLDGFMGRIRSVYPVASPNECNQMCLSTLMKCDHCGETSWQTGDFVKATCEFCGTENLTKEGATTCGYLPQNAVVKIYCPACHNSEVGPEHSLAEYHNESGLKTILRK…	mRNA#13684_1_copies:polyA_is_-1 coordinates are BetaCoV/England/02/2020; mRNA#35742_1_copies:polyA_is_-1 coordinates are BetaCoV/England/02/2020; mRNA#11782_1_copies:polyA_is_-1 coordinates are BetaCoV/England/02/2020; mRNA#18463_1_copies:polyA_is_-1 coordinates are BetaCoV/England/02/2020; mRNA#20659_1_copies:polyA_is_-1 coordinates are BetaCoV/England/02/2020; mRNA#16482_1_copies:polyA_is_-1 co…
SARS2_ORF1a	13	1690	1701	FNPPALQDAYYR	MESLVPGFNEKTHVQLSLPVLQVRDVLVRGFGDSVEEVLSEARQHLKDGTCGLVEVEKGVLPQLEQPYVFIKRSDARTAPHGHVMVELVAELEGIQYGRSGETLGVLVPHVGEIPVAYRKVLLRKNGNKGAGGHSYGADLKSFDLGDELGTDPYEDFQENWNTKHSSGVTRELMRELNGGAYTRYVDNNFCGPDGYPLECIKDLLARAGKASCTLSEQLDFIDTKRGVYCCREHEHEIAWYTERSEKSYELQTPFEIKLAKKFDTFNGECPNFVFPLNSIIKTIQPRVEKKKLDGFMGRIRSVYPVASPNECNQMCLSTLMKCDHCGETSWQTGDFVKATCEFCGTENLTKEGATTCGYLPQNAVVKIYCPACHNSEVGPEHSLAEYHNESGLKTILRK…	mRNA#13684_1_copies:polyA_is_-1 coordinates are BetaCoV/England/02/2020; mRNA#35742_1_copies:polyA_is_-1 coordinates are BetaCoV/England/02/2020; mRNA#11782_1_copies:polyA_is_-1 coordinates are BetaCoV/England/02/2020; mRNA#18463_1_copies:polyA_is_-1 coordinates are BetaCoV/England/02/2020; mRNA#20659_1_copies:polyA_is_-1 coordinates are BetaCoV/England/02/2020; mRNA#16482_1_copies:polyA_is_-1 co…
SARS2_ORF1a	13	1704	1720	AGEAANFCALILAYCNK	MESLVPGFNEKTHVQLSLPVLQVRDVLVRGFGDSVEEVLSEARQHLKDGTCGLVEVEKGVLPQLEQPYVFIKRSDARTAPHGHVMVELVAELEGIQYGRSGETLGVLVPHVGEIPVAYRKVLLRKNGNKGAGGHSYGADLKSFDLGDELGTDPYEDFQENWNTKHSSGVTRELMRELNGGAYTRYVDNNFCGPDGYPLECIKDLLARAGKASCTLSEQLDFIDTKRGVYCCREHEHEIAWYTERSEKSYELQTPFEIKLAKKFDTFNGECPNFVFPLNSIIKTIQPRVEKKKLDGFMGRIRSVYPVASPNECNQMCLSTLMKCDHCGETSWQTGDFVKATCEFCGTENLTKEGATTCGYLPQNAVVKIYCPACHNSEVGPEHSLAEYHNESGLKTILRK…	mRNA#13684_1_copies:polyA_is_-1 coordinates are BetaCoV/England/02/2020; mRNA#35742_1_copies:polyA_is_-1 coordinates are BetaCoV/England/02/2020; mRNA#11782_1_copies:polyA_is_-1 coordinates are BetaCoV/England/02/2020; mRNA#18463_1_copies:polyA_is_-1 coordinates are BetaCoV/England/02/2020; mRNA#20659_1_copies:polyA_is_-1 coordinates are BetaCoV/England/02/2020; mRNA#16482_1_copies:polyA_is_-1 co…
SARS2_ORF1a	4	1721	1729	TVGELGDVR	MESLVPGFNEKTHVQLSLPVLQVRDVLVRGFGDSVEEVLSEARQHLKDGTCGLVEVEKGVLPQLEQPYVFIKRSDARTAPHGHVMVELVAELEGIQYGRSGETLGVLVPHVGEIPVAYRKVLLRKNGNKGAGGHSYGADLKSFDLGDELGTDPYEDFQENWNTKHSSGVTRELMRELNGGAYTRYVDNNFCGPDGYPLECIKDLLARAGKASCTLSEQLDFIDTKRGVYCCREHEHEIAWYTERSEKSYELQTPFEIKLAKKFDTFNGECPNFVFPLNSIIKTIQPRVEKKKLDGFMGRIRSVYPVASPNECNQMCLSTLMKCDHCGETSWQTGDFVKATCEFCGTENLTKEGATTCGYLPQNAVVKIYCPACHNSEVGPEHSLAEYHNESGLKTILRK…	mRNA#13684_1_copies:polyA_is_-1 coordinates are BetaCoV/England/02/2020; mRNA#35742_1_copies:polyA_is_-1 coordinates are BetaCoV/England/02/2020; mRNA#11782_1_copies:polyA_is_-1 coordinates are BetaCoV/England/02/2020; mRNA#18463_1_copies:polyA_is_-1 coordinates are BetaCoV/England/02/2020; mRNA#20659_1_copies:polyA_is_-1 coordinates are BetaCoV/England/02/2020; mRNA#16482_1_copies:polyA_is_-1 co…
SARS2_ORF1a	14	1730	1745	ETMSYLFQHANLDSCK	MESLVPGFNEKTHVQLSLPVLQVRDVLVRGFGDSVEEVLSEARQHLKDGTCGLVEVEKGVLPQLEQPYVFIKRSDARTAPHGHVMVELVAELEGIQYGRSGETLGVLVPHVGEIPVAYRKVLLRKNGNKGAGGHSYGADLKSFDLGDELGTDPYEDFQENWNTKHSSGVTRELMRELNGGAYTRYVDNNFCGPDGYPLECIKDLLARAGKASCTLSEQLDFIDTKRGVYCCREHEHEIAWYTERSEKSYELQTPFEIKLAKKFDTFNGECPNFVFPLNSIIKTIQPRVEKKKLDGFMGRIRSVYPVASPNECNQMCLSTLMKCDHCGETSWQTGDFVKATCEFCGTENLTKEGATTCGYLPQNAVVKIYCPACHNSEVGPEHSLAEYHNESGLKTILRK…	mRNA#13684_1_copies:polyA_is_-1 coordinates are BetaCoV/England/02/2020; mRNA#35742_1_copies:polyA_is_-1 coordinates are BetaCoV/England/02/2020; mRNA#11782_1_copies:polyA_is_-1 coordinates are BetaCoV/England/02/2020; mRNA#18463_1_copies:polyA_is_-1 coordinates are BetaCoV/England/02/2020; mRNA#20659_1_copies:polyA_is_-1 coordinates are BetaCoV/England/02/2020; mRNA#16482_1_copies:polyA_is_-1 co…
SARS2_ORF1a	24	1730	1746	ETMSYLFQHANLDSCKR	MESLVPGFNEKTHVQLSLPVLQVRDVLVRGFGDSVEEVLSEARQHLKDGTCGLVEVEKGVLPQLEQPYVFIKRSDARTAPHGHVMVELVAELEGIQYGRSGETLGVLVPHVGEIPVAYRKVLLRKNGNKGAGGHSYGADLKSFDLGDELGTDPYEDFQENWNTKHSSGVTRELMRELNGGAYTRYVDNNFCGPDGYPLECIKDLLARAGKASCTLSEQLDFIDTKRGVYCCREHEHEIAWYTERSEKSYELQTPFEIKLAKKFDTFNGECPNFVFPLNSIIKTIQPRVEKKKLDGFMGRIRSVYPVASPNECNQMCLSTLMKCDHCGETSWQTGDFVKATCEFCGTENLTKEGATTCGYLPQNAVVKIYCPACHNSEVGPEHSLAEYHNESGLKTILRK…	mRNA#13684_1_copies:polyA_is_-1 coordinates are BetaCoV/England/02/2020; mRNA#35742_1_copies:polyA_is_-1 coordinates are BetaCoV/England/02/2020; mRNA#11782_1_copies:polyA_is_-1 coordinates are BetaCoV/England/02/2020; mRNA#18463_1_copies:polyA_is_-1 coordinates are BetaCoV/England/02/2020; mRNA#20659_1_copies:polyA_is_-1 coordinates are BetaCoV/England/02/2020; mRNA#16482_1_copies:polyA_is_-1 co…
SARS2_ORF1a	4	1747	1753	VLNVVCK	MESLVPGFNEKTHVQLSLPVLQVRDVLVRGFGDSVEEVLSEARQHLKDGTCGLVEVEKGVLPQLEQPYVFIKRSDARTAPHGHVMVELVAELEGIQYGRSGETLGVLVPHVGEIPVAYRKVLLRKNGNKGAGGHSYGADLKSFDLGDELGTDPYEDFQENWNTKHSSGVTRELMRELNGGAYTRYVDNNFCGPDGYPLECIKDLLARAGKASCTLSEQLDFIDTKRGVYCCREHEHEIAWYTERSEKSYELQTPFEIKLAKKFDTFNGECPNFVFPLNSIIKTIQPRVEKKKLDGFMGRIRSVYPVASPNECNQMCLSTLMKCDHCGETSWQTGDFVKATCEFCGTENLTKEGATTCGYLPQNAVVKIYCPACHNSEVGPEHSLAEYHNESGLKTILRK…	mRNA#13684_1_copies:polyA_is_-1 coordinates are BetaCoV/England/02/2020; mRNA#35742_1_copies:polyA_is_-1 coordinates are BetaCoV/England/02/2020; mRNA#11782_1_copies:polyA_is_-1 coordinates are BetaCoV/England/02/2020; mRNA#18463_1_copies:polyA_is_-1 coordinates are BetaCoV/England/02/2020; mRNA#20659_1_copies:polyA_is_-1 coordinates are BetaCoV/England/02/2020; mRNA#16482_1_copies:polyA_is_-1 co…
SARS2_ORF1a	6	1754	1763	TCGQQQTTLK	MESLVPGFNEKTHVQLSLPVLQVRDVLVRGFGDSVEEVLSEARQHLKDGTCGLVEVEKGVLPQLEQPYVFIKRSDARTAPHGHVMVELVAELEGIQYGRSGETLGVLVPHVGEIPVAYRKVLLRKNGNKGAGGHSYGADLKSFDLGDELGTDPYEDFQENWNTKHSSGVTRELMRELNGGAYTRYVDNNFCGPDGYPLECIKDLLARAGKASCTLSEQLDFIDTKRGVYCCREHEHEIAWYTERSEKSYELQTPFEIKLAKKFDTFNGECPNFVFPLNSIIKTIQPRVEKKKLDGFMGRIRSVYPVASPNECNQMCLSTLMKCDHCGETSWQTGDFVKATCEFCGTENLTKEGATTCGYLPQNAVVKIYCPACHNSEVGPEHSLAEYHNESGLKTILRK…	mRNA#13684_1_copies:polyA_is_-1 coordinates are BetaCoV/England/02/2020; mRNA#35742_1_copies:polyA_is_-1 coordinates are BetaCoV/England/02/2020; mRNA#11782_1_copies:polyA_is_-1 coordinates are BetaCoV/England/02/2020; mRNA#18463_1_copies:polyA_is_-1 coordinates are BetaCoV/England/02/2020; mRNA#20659_1_copies:polyA_is_-1 coordinates are BetaCoV/England/02/2020; mRNA#16482_1_copies:polyA_is_-1 co…
SARS2_ORF1a	4	1764	1780	GVEAVMYMGTLSYEQFK	MESLVPGFNEKTHVQLSLPVLQVRDVLVRGFGDSVEEVLSEARQHLKDGTCGLVEVEKGVLPQLEQPYVFIKRSDARTAPHGHVMVELVAELEGIQYGRSGETLGVLVPHVGEIPVAYRKVLLRKNGNKGAGGHSYGADLKSFDLGDELGTDPYEDFQENWNTKHSSGVTRELMRELNGGAYTRYVDNNFCGPDGYPLECIKDLLARAGKASCTLSEQLDFIDTKRGVYCCREHEHEIAWYTERSEKSYELQTPFEIKLAKKFDTFNGECPNFVFPLNSIIKTIQPRVEKKKLDGFMGRIRSVYPVASPNECNQMCLSTLMKCDHCGETSWQTGDFVKATCEFCGTENLTKEGATTCGYLPQNAVVKIYCPACHNSEVGPEHSLAEYHNESGLKTILRK…	mRNA#13684_1_copies:polyA_is_-1 coordinates are BetaCoV/England/02/2020; mRNA#35742_1_copies:polyA_is_-1 coordinates are BetaCoV/England/02/2020; mRNA#11782_1_copies:polyA_is_-1 coordinates are BetaCoV/England/02/2020; mRNA#18463_1_copies:polyA_is_-1 coordinates are BetaCoV/England/02/2020; mRNA#20659_1_copies:polyA_is_-1 coordinates are BetaCoV/England/02/2020; mRNA#16482_1_copies:polyA_is_-1 co…
SARS2_ORF1a	10	1764	1781	GVEAVMYMGTLSYEQFKK	MESLVPGFNEKTHVQLSLPVLQVRDVLVRGFGDSVEEVLSEARQHLKDGTCGLVEVEKGVLPQLEQPYVFIKRSDARTAPHGHVMVELVAELEGIQYGRSGETLGVLVPHVGEIPVAYRKVLLRKNGNKGAGGHSYGADLKSFDLGDELGTDPYEDFQENWNTKHSSGVTRELMRELNGGAYTRYVDNNFCGPDGYPLECIKDLLARAGKASCTLSEQLDFIDTKRGVYCCREHEHEIAWYTERSEKSYELQTPFEIKLAKKFDTFNGECPNFVFPLNSIIKTIQPRVEKKKLDGFMGRIRSVYPVASPNECNQMCLSTLMKCDHCGETSWQTGDFVKATCEFCGTENLTKEGATTCGYLPQNAVVKIYCPACHNSEVGPEHSLAEYHNESGLKTILRK…	mRNA#13684_1_copies:polyA_is_-1 coordinates are BetaCoV/England/02/2020; mRNA#35742_1_copies:polyA_is_-1 coordinates are BetaCoV/England/02/2020; mRNA#11782_1_copies:polyA_is_-1 coordinates are BetaCoV/England/02/2020; mRNA#18463_1_copies:polyA_is_-1 coordinates are BetaCoV/England/02/2020; mRNA#20659_1_copies:polyA_is_-1 coordinates are BetaCoV/England/02/2020; mRNA#16482_1_copies:polyA_is_-1 co…
SARS2_ORF1a	4	1782	1791	GVQIPCTCGK	MESLVPGFNEKTHVQLSLPVLQVRDVLVRGFGDSVEEVLSEARQHLKDGTCGLVEVEKGVLPQLEQPYVFIKRSDARTAPHGHVMVELVAELEGIQYGRSGETLGVLVPHVGEIPVAYRKVLLRKNGNKGAGGHSYGADLKSFDLGDELGTDPYEDFQENWNTKHSSGVTRELMRELNGGAYTRYVDNNFCGPDGYPLECIKDLLARAGKASCTLSEQLDFIDTKRGVYCCREHEHEIAWYTERSEKSYELQTPFEIKLAKKFDTFNGECPNFVFPLNSIIKTIQPRVEKKKLDGFMGRIRSVYPVASPNECNQMCLSTLMKCDHCGETSWQTGDFVKATCEFCGTENLTKEGATTCGYLPQNAVVKIYCPACHNSEVGPEHSLAEYHNESGLKTILRK…	mRNA#13684_1_copies:polyA_is_-1 coordinates are BetaCoV/England/02/2020; mRNA#35742_1_copies:polyA_is_-1 coordinates are BetaCoV/England/02/2020; mRNA#11782_1_copies:polyA_is_-1 coordinates are BetaCoV/England/02/2020; mRNA#18463_1_copies:polyA_is_-1 coordinates are BetaCoV/England/02/2020; mRNA#12459_1_copies:polyA_is_-1 coordinates are BetaCoV/England/02/2020; mRNA#20659_1_copies:polyA_is_-1 co…
SARS2_ORF1a	33	1796	1817	YLVQQESPFVMMSAPPAQYELK	MESLVPGFNEKTHVQLSLPVLQVRDVLVRGFGDSVEEVLSEARQHLKDGTCGLVEVEKGVLPQLEQPYVFIKRSDARTAPHGHVMVELVAELEGIQYGRSGETLGVLVPHVGEIPVAYRKVLLRKNGNKGAGGHSYGADLKSFDLGDELGTDPYEDFQENWNTKHSSGVTRELMRELNGGAYTRYVDNNFCGPDGYPLECIKDLLARAGKASCTLSEQLDFIDTKRGVYCCREHEHEIAWYTERSEKSYELQTPFEIKLAKKFDTFNGECPNFVFPLNSIIKTIQPRVEKKKLDGFMGRIRSVYPVASPNECNQMCLSTLMKCDHCGETSWQTGDFVKATCEFCGTENLTKEGATTCGYLPQNAVVKIYCPACHNSEVGPEHSLAEYHNESGLKTILRK…	mRNA#13684_1_copies:polyA_is_-1 coordinates are BetaCoV/England/02/2020; mRNA#35742_1_copies:polyA_is_-1 coordinates are BetaCoV/England/02/2020; mRNA#11782_1_copies:polyA_is_-1 coordinates are BetaCoV/England/02/2020; mRNA#18463_1_copies:polyA_is_-1 coordinates are BetaCoV/England/02/2020; mRNA#12459_1_copies:polyA_is_-1 coordinates are BetaCoV/England/02/2020; mRNA#20659_1_copies:polyA_is_-1 co…
SARS2_ORF1a	12	1818	1837	HGTFTCASEYTGNYQCGHYK	MESLVPGFNEKTHVQLSLPVLQVRDVLVRGFGDSVEEVLSEARQHLKDGTCGLVEVEKGVLPQLEQPYVFIKRSDARTAPHGHVMVELVAELEGIQYGRSGETLGVLVPHVGEIPVAYRKVLLRKNGNKGAGGHSYGADLKSFDLGDELGTDPYEDFQENWNTKHSSGVTRELMRELNGGAYTRYVDNNFCGPDGYPLECIKDLLARAGKASCTLSEQLDFIDTKRGVYCCREHEHEIAWYTERSEKSYELQTPFEIKLAKKFDTFNGECPNFVFPLNSIIKTIQPRVEKKKLDGFMGRIRSVYPVASPNECNQMCLSTLMKCDHCGETSWQTGDFVKATCEFCGTENLTKEGATTCGYLPQNAVVKIYCPACHNSEVGPEHSLAEYHNESGLKTILRK…	mRNA#13684_1_copies:polyA_is_-1 coordinates are BetaCoV/England/02/2020; mRNA#11782_1_copies:polyA_is_-1 coordinates are BetaCoV/England/02/2020; mRNA#23280_1_copies:polyA_is_-1 coordinates are BetaCoV/England/02/2020; mRNA#18463_1_copies:polyA_is_-1 coordinates are BetaCoV/England/02/2020; mRNA#12459_1_copies:polyA_is_-1 coordinates are BetaCoV/England/02/2020; mRNA#20659_1_copies:polyA_is_-1 co…
SARS2_ORF1a	12	1843	1855	ETLYCIDGALLTK	MESLVPGFNEKTHVQLSLPVLQVRDVLVRGFGDSVEEVLSEARQHLKDGTCGLVEVEKGVLPQLEQPYVFIKRSDARTAPHGHVMVELVAELEGIQYGRSGETLGVLVPHVGEIPVAYRKVLLRKNGNKGAGGHSYGADLKSFDLGDELGTDPYEDFQENWNTKHSSGVTRELMRELNGGAYTRYVDNNFCGPDGYPLECIKDLLARAGKASCTLSEQLDFIDTKRGVYCCREHEHEIAWYTERSEKSYELQTPFEIKLAKKFDTFNGECPNFVFPLNSIIKTIQPRVEKKKLDGFMGRIRSVYPVASPNECNQMCLSTLMKCDHCGETSWQTGDFVKATCEFCGTENLTKEGATTCGYLPQNAVVKIYCPACHNSEVGPEHSLAEYHNESGLKTILRK…	mRNA#13684_1_copies:polyA_is_-1 coordinates are BetaCoV/England/02/2020; mRNA#11782_1_copies:polyA_is_-1 coordinates are BetaCoV/England/02/2020; mRNA#23280_1_copies:polyA_is_-1 coordinates are BetaCoV/England/02/2020; mRNA#18463_1_copies:polyA_is_-1 coordinates are BetaCoV/England/02/2020; mRNA#12459_1_copies:polyA_is_-1 coordinates are BetaCoV/England/02/2020; mRNA#20659_1_copies:polyA_is_-1 co…
SARS2_ORF1a	12	1856	1869	SSEYKGPITDVFYK	MESLVPGFNEKTHVQLSLPVLQVRDVLVRGFGDSVEEVLSEARQHLKDGTCGLVEVEKGVLPQLEQPYVFIKRSDARTAPHGHVMVELVAELEGIQYGRSGETLGVLVPHVGEIPVAYRKVLLRKNGNKGAGGHSYGADLKSFDLGDELGTDPYEDFQENWNTKHSSGVTRELMRELNGGAYTRYVDNNFCGPDGYPLECIKDLLARAGKASCTLSEQLDFIDTKRGVYCCREHEHEIAWYTERSEKSYELQTPFEIKLAKKFDTFNGECPNFVFPLNSIIKTIQPRVEKKKLDGFMGRIRSVYPVASPNECNQMCLSTLMKCDHCGETSWQTGDFVKATCEFCGTENLTKEGATTCGYLPQNAVVKIYCPACHNSEVGPEHSLAEYHNESGLKTILRK…	mRNA#13684_1_copies:polyA_is_-1 coordinates are BetaCoV/England/02/2020; mRNA#11782_1_copies:polyA_is_-1 coordinates are BetaCoV/England/02/2020; mRNA#23280_1_copies:polyA_is_-1 coordinates are BetaCoV/England/02/2020; mRNA#18463_1_copies:polyA_is_-1 coordinates are BetaCoV/England/02/2020; mRNA#12459_1_copies:polyA_is_-1 coordinates are BetaCoV/England/02/2020; mRNA#20659_1_copies:polyA_is_-1 co…
SARS2_ORF1a	1	1856	1883	SSEYKGPITDVFYKENSYTTTIKPVTYK	MESLVPGFNEKTHVQLSLPVLQVRDVLVRGFGDSVEEVLSEARQHLKDGTCGLVEVEKGVLPQLEQPYVFIKRSDARTAPHGHVMVELVAELEGIQYGRSGETLGVLVPHVGEIPVAYRKVLLRKNGNKGAGGHSYGADLKSFDLGDELGTDPYEDFQENWNTKHSSGVTRELMRELNGGAYTRYVDNNFCGPDGYPLECIKDLLARAGKASCTLSEQLDFIDTKRGVYCCREHEHEIAWYTERSEKSYELQTPFEIKLAKKFDTFNGECPNFVFPLNSIIKTIQPRVEKKKLDGFMGRIRSVYPVASPNECNQMCLSTLMKCDHCGETSWQTGDFVKATCEFCGTENLTKEGATTCGYLPQNAVVKIYCPACHNSEVGPEHSLAEYHNESGLKTILRK…	mRNA#13684_1_copies:polyA_is_-1 coordinates are BetaCoV/England/02/2020; mRNA#11782_1_copies:polyA_is_-1 coordinates are BetaCoV/England/02/2020; mRNA#23280_1_copies:polyA_is_-1 coordinates are BetaCoV/England/02/2020; mRNA#18463_1_copies:polyA_is_-1 coordinates are BetaCoV/England/02/2020; mRNA#12459_1_copies:polyA_is_-1 coordinates are BetaCoV/England/02/2020; mRNA#20659_1_copies:polyA_is_-1 co…
SARS2_ORF1a	4	1861	1869	GPITDVFYK	MESLVPGFNEKTHVQLSLPVLQVRDVLVRGFGDSVEEVLSEARQHLKDGTCGLVEVEKGVLPQLEQPYVFIKRSDARTAPHGHVMVELVAELEGIQYGRSGETLGVLVPHVGEIPVAYRKVLLRKNGNKGAGGHSYGADLKSFDLGDELGTDPYEDFQENWNTKHSSGVTRELMRELNGGAYTRYVDNNFCGPDGYPLECIKDLLARAGKASCTLSEQLDFIDTKRGVYCCREHEHEIAWYTERSEKSYELQTPFEIKLAKKFDTFNGECPNFVFPLNSIIKTIQPRVEKKKLDGFMGRIRSVYPVASPNECNQMCLSTLMKCDHCGETSWQTGDFVKATCEFCGTENLTKEGATTCGYLPQNAVVKIYCPACHNSEVGPEHSLAEYHNESGLKTILRK…	mRNA#13684_1_copies:polyA_is_-1 coordinates are BetaCoV/England/02/2020; mRNA#11782_1_copies:polyA_is_-1 coordinates are BetaCoV/England/02/2020; mRNA#23280_1_copies:polyA_is_-1 coordinates are BetaCoV/England/02/2020; mRNA#18463_1_copies:polyA_is_-1 coordinates are BetaCoV/England/02/2020; mRNA#12459_1_copies:polyA_is_-1 coordinates are BetaCoV/England/02/2020; mRNA#20659_1_copies:polyA_is_-1 co…
SARS2_ORF1a	1	1861	1883	GPITDVFYKENSYTTTIKPVTYK	MESLVPGFNEKTHVQLSLPVLQVRDVLVRGFGDSVEEVLSEARQHLKDGTCGLVEVEKGVLPQLEQPYVFIKRSDARTAPHGHVMVELVAELEGIQYGRSGETLGVLVPHVGEIPVAYRKVLLRKNGNKGAGGHSYGADLKSFDLGDELGTDPYEDFQENWNTKHSSGVTRELMRELNGGAYTRYVDNNFCGPDGYPLECIKDLLARAGKASCTLSEQLDFIDTKRGVYCCREHEHEIAWYTERSEKSYELQTPFEIKLAKKFDTFNGECPNFVFPLNSIIKTIQPRVEKKKLDGFMGRIRSVYPVASPNECNQMCLSTLMKCDHCGETSWQTGDFVKATCEFCGTENLTKEGATTCGYLPQNAVVKIYCPACHNSEVGPEHSLAEYHNESGLKTILRK…	mRNA#13684_1_copies:polyA_is_-1 coordinates are BetaCoV/England/02/2020; mRNA#11782_1_copies:polyA_is_-1 coordinates are BetaCoV/England/02/2020; mRNA#23280_1_copies:polyA_is_-1 coordinates are BetaCoV/England/02/2020; mRNA#18463_1_copies:polyA_is_-1 coordinates are BetaCoV/England/02/2020; mRNA#12459_1_copies:polyA_is_-1 coordinates are BetaCoV/England/02/2020; mRNA#20659_1_copies:polyA_is_-1 co…
SARS2_ORF1a	20	1870	1883	ENSYTTTIKPVTYK	MESLVPGFNEKTHVQLSLPVLQVRDVLVRGFGDSVEEVLSEARQHLKDGTCGLVEVEKGVLPQLEQPYVFIKRSDARTAPHGHVMVELVAELEGIQYGRSGETLGVLVPHVGEIPVAYRKVLLRKNGNKGAGGHSYGADLKSFDLGDELGTDPYEDFQENWNTKHSSGVTRELMRELNGGAYTRYVDNNFCGPDGYPLECIKDLLARAGKASCTLSEQLDFIDTKRGVYCCREHEHEIAWYTERSEKSYELQTPFEIKLAKKFDTFNGECPNFVFPLNSIIKTIQPRVEKKKLDGFMGRIRSVYPVASPNECNQMCLSTLMKCDHCGETSWQTGDFVKATCEFCGTENLTKEGATTCGYLPQNAVVKIYCPACHNSEVGPEHSLAEYHNESGLKTILRK…	mRNA#13684_1_copies:polyA_is_-1 coordinates are BetaCoV/England/02/2020; mRNA#11782_1_copies:polyA_is_-1 coordinates are BetaCoV/England/02/2020; mRNA#23280_1_copies:polyA_is_-1 coordinates are BetaCoV/England/02/2020; mRNA#18463_1_copies:polyA_is_-1 coordinates are BetaCoV/England/02/2020; mRNA#12459_1_copies:polyA_is_-1 coordinates are BetaCoV/England/02/2020; mRNA#20659_1_copies:polyA_is_-1 co…
SARS2_ORF1a	7	1884	1895	LDGVVCTEIDPK	MESLVPGFNEKTHVQLSLPVLQVRDVLVRGFGDSVEEVLSEARQHLKDGTCGLVEVEKGVLPQLEQPYVFIKRSDARTAPHGHVMVELVAELEGIQYGRSGETLGVLVPHVGEIPVAYRKVLLRKNGNKGAGGHSYGADLKSFDLGDELGTDPYEDFQENWNTKHSSGVTRELMRELNGGAYTRYVDNNFCGPDGYPLECIKDLLARAGKASCTLSEQLDFIDTKRGVYCCREHEHEIAWYTERSEKSYELQTPFEIKLAKKFDTFNGECPNFVFPLNSIIKTIQPRVEKKKLDGFMGRIRSVYPVASPNECNQMCLSTLMKCDHCGETSWQTGDFVKATCEFCGTENLTKEGATTCGYLPQNAVVKIYCPACHNSEVGPEHSLAEYHNESGLKTILRK…	mRNA#13684_1_copies:polyA_is_-1 coordinates are BetaCoV/England/02/2020; mRNA#11782_1_copies:polyA_is_-1 coordinates are BetaCoV/England/02/2020; mRNA#23280_1_copies:polyA_is_-1 coordinates are BetaCoV/England/02/2020; mRNA#18463_1_copies:polyA_is_-1 coordinates are BetaCoV/England/02/2020; mRNA#12459_1_copies:polyA_is_-1 coordinates are BetaCoV/England/02/2020; mRNA#20659_1_copies:polyA_is_-1 co…
SARS2_ORF1a	1	1896	1901	LDNYYK	MESLVPGFNEKTHVQLSLPVLQVRDVLVRGFGDSVEEVLSEARQHLKDGTCGLVEVEKGVLPQLEQPYVFIKRSDARTAPHGHVMVELVAELEGIQYGRSGETLGVLVPHVGEIPVAYRKVLLRKNGNKGAGGHSYGADLKSFDLGDELGTDPYEDFQENWNTKHSSGVTRELMRELNGGAYTRYVDNNFCGPDGYPLECIKDLLARAGKASCTLSEQLDFIDTKRGVYCCREHEHEIAWYTERSEKSYELQTPFEIKLAKKFDTFNGECPNFVFPLNSIIKTIQPRVEKKKLDGFMGRIRSVYPVASPNECNQMCLSTLMKCDHCGETSWQTGDFVKATCEFCGTENLTKEGATTCGYLPQNAVVKIYCPACHNSEVGPEHSLAEYHNESGLKTILRK…	mRNA#13684_1_copies:polyA_is_-1 coordinates are BetaCoV/England/02/2020; mRNA#11782_1_copies:polyA_is_-1 coordinates are BetaCoV/England/02/2020; mRNA#23280_1_copies:polyA_is_-1 coordinates are BetaCoV/England/02/2020; mRNA#18463_1_copies:polyA_is_-1 coordinates are BetaCoV/England/02/2020; mRNA#12459_1_copies:polyA_is_-1 coordinates are BetaCoV/England/02/2020; mRNA#20659_1_copies:polyA_is_-1 co…
SARS2_ORF1a	2	1896	1902	LDNYYKK	MESLVPGFNEKTHVQLSLPVLQVRDVLVRGFGDSVEEVLSEARQHLKDGTCGLVEVEKGVLPQLEQPYVFIKRSDARTAPHGHVMVELVAELEGIQYGRSGETLGVLVPHVGEIPVAYRKVLLRKNGNKGAGGHSYGADLKSFDLGDELGTDPYEDFQENWNTKHSSGVTRELMRELNGGAYTRYVDNNFCGPDGYPLECIKDLLARAGKASCTLSEQLDFIDTKRGVYCCREHEHEIAWYTERSEKSYELQTPFEIKLAKKFDTFNGECPNFVFPLNSIIKTIQPRVEKKKLDGFMGRIRSVYPVASPNECNQMCLSTLMKCDHCGETSWQTGDFVKATCEFCGTENLTKEGATTCGYLPQNAVVKIYCPACHNSEVGPEHSLAEYHNESGLKTILRK…	mRNA#13684_1_copies:polyA_is_-1 coordinates are BetaCoV/England/02/2020; mRNA#11782_1_copies:polyA_is_-1 coordinates are BetaCoV/England/02/2020; mRNA#23280_1_copies:polyA_is_-1 coordinates are BetaCoV/England/02/2020; mRNA#18463_1_copies:polyA_is_-1 coordinates are BetaCoV/England/02/2020; mRNA#12459_1_copies:polyA_is_-1 coordinates are BetaCoV/England/02/2020; mRNA#20659_1_copies:polyA_is_-1 co…
SARS2_ORF1a	3	1902	1929	KDNSYFTEQPIDLVPNQPYPNASFDNFK	MESLVPGFNEKTHVQLSLPVLQVRDVLVRGFGDSVEEVLSEARQHLKDGTCGLVEVEKGVLPQLEQPYVFIKRSDARTAPHGHVMVELVAELEGIQYGRSGETLGVLVPHVGEIPVAYRKVLLRKNGNKGAGGHSYGADLKSFDLGDELGTDPYEDFQENWNTKHSSGVTRELMRELNGGAYTRYVDNNFCGPDGYPLECIKDLLARAGKASCTLSEQLDFIDTKRGVYCCREHEHEIAWYTERSEKSYELQTPFEIKLAKKFDTFNGECPNFVFPLNSIIKTIQPRVEKKKLDGFMGRIRSVYPVASPNECNQMCLSTLMKCDHCGETSWQTGDFVKATCEFCGTENLTKEGATTCGYLPQNAVVKIYCPACHNSEVGPEHSLAEYHNESGLKTILRK…	mRNA#13684_1_copies:polyA_is_-1 coordinates are BetaCoV/England/02/2020; mRNA#35742_1_copies:polyA_is_-1 coordinates are BetaCoV/England/02/2020; mRNA#11782_1_copies:polyA_is_-1 coordinates are BetaCoV/England/02/2020; mRNA#23280_1_copies:polyA_is_-1 coordinates are BetaCoV/England/02/2020; mRNA#18463_1_copies:polyA_is_-1 coordinates are BetaCoV/England/02/2020; mRNA#35571_1_copies:polyA_is_-1 co…
SARS2_ORF1a	10	1903	1929	DNSYFTEQPIDLVPNQPYPNASFDNFK	MESLVPGFNEKTHVQLSLPVLQVRDVLVRGFGDSVEEVLSEARQHLKDGTCGLVEVEKGVLPQLEQPYVFIKRSDARTAPHGHVMVELVAELEGIQYGRSGETLGVLVPHVGEIPVAYRKVLLRKNGNKGAGGHSYGADLKSFDLGDELGTDPYEDFQENWNTKHSSGVTRELMRELNGGAYTRYVDNNFCGPDGYPLECIKDLLARAGKASCTLSEQLDFIDTKRGVYCCREHEHEIAWYTERSEKSYELQTPFEIKLAKKFDTFNGECPNFVFPLNSIIKTIQPRVEKKKLDGFMGRIRSVYPVASPNECNQMCLSTLMKCDHCGETSWQTGDFVKATCEFCGTENLTKEGATTCGYLPQNAVVKIYCPACHNSEVGPEHSLAEYHNESGLKTILRK…	mRNA#13684_1_copies:polyA_is_-1 coordinates are BetaCoV/England/02/2020; mRNA#35742_1_copies:polyA_is_-1 coordinates are BetaCoV/England/02/2020; mRNA#11782_1_copies:polyA_is_-1 coordinates are BetaCoV/England/02/2020; mRNA#23280_1_copies:polyA_is_-1 coordinates are BetaCoV/England/02/2020; mRNA#18463_1_copies:polyA_is_-1 coordinates are BetaCoV/England/02/2020; mRNA#35571_1_copies:polyA_is_-1 co…
SARS2_ORF1a	1	1930	1936	FVCDNIK	MESLVPGFNEKTHVQLSLPVLQVRDVLVRGFGDSVEEVLSEARQHLKDGTCGLVEVEKGVLPQLEQPYVFIKRSDARTAPHGHVMVELVAELEGIQYGRSGETLGVLVPHVGEIPVAYRKVLLRKNGNKGAGGHSYGADLKSFDLGDELGTDPYEDFQENWNTKHSSGVTRELMRELNGGAYTRYVDNNFCGPDGYPLECIKDLLARAGKASCTLSEQLDFIDTKRGVYCCREHEHEIAWYTERSEKSYELQTPFEIKLAKKFDTFNGECPNFVFPLNSIIKTIQPRVEKKKLDGFMGRIRSVYPVASPNECNQMCLSTLMKCDHCGETSWQTGDFVKATCEFCGTENLTKEGATTCGYLPQNAVVKIYCPACHNSEVGPEHSLAEYHNESGLKTILRK…	mRNA#13684_1_copies:polyA_is_-1 coordinates are BetaCoV/England/02/2020; mRNA#35742_1_copies:polyA_is_-1 coordinates are BetaCoV/England/02/2020; mRNA#11782_1_copies:polyA_is_-1 coordinates are BetaCoV/England/02/2020; mRNA#23280_1_copies:polyA_is_-1 coordinates are BetaCoV/England/02/2020; mRNA#18463_1_copies:polyA_is_-1 coordinates are BetaCoV/England/02/2020; mRNA#35571_1_copies:polyA_is_-1 co…
SARS2_ORF1a	14	1937	1948	FADDLNQLTGYK	MESLVPGFNEKTHVQLSLPVLQVRDVLVRGFGDSVEEVLSEARQHLKDGTCGLVEVEKGVLPQLEQPYVFIKRSDARTAPHGHVMVELVAELEGIQYGRSGETLGVLVPHVGEIPVAYRKVLLRKNGNKGAGGHSYGADLKSFDLGDELGTDPYEDFQENWNTKHSSGVTRELMRELNGGAYTRYVDNNFCGPDGYPLECIKDLLARAGKASCTLSEQLDFIDTKRGVYCCREHEHEIAWYTERSEKSYELQTPFEIKLAKKFDTFNGECPNFVFPLNSIIKTIQPRVEKKKLDGFMGRIRSVYPVASPNECNQMCLSTLMKCDHCGETSWQTGDFVKATCEFCGTENLTKEGATTCGYLPQNAVVKIYCPACHNSEVGPEHSLAEYHNESGLKTILRK…	mRNA#13684_1_copies:polyA_is_-1 coordinates are BetaCoV/England/02/2020; mRNA#35742_1_copies:polyA_is_-1 coordinates are BetaCoV/England/02/2020; mRNA#11782_1_copies:polyA_is_-1 coordinates are BetaCoV/England/02/2020; mRNA#23280_1_copies:polyA_is_-1 coordinates are BetaCoV/England/02/2020; mRNA#18463_1_copies:polyA_is_-1 coordinates are BetaCoV/England/02/2020; mRNA#35571_1_copies:polyA_is_-1 co…
SARS2_ORF1a	1	1937	1953	FADDLNQLTGYKKPASR	MESLVPGFNEKTHVQLSLPVLQVRDVLVRGFGDSVEEVLSEARQHLKDGTCGLVEVEKGVLPQLEQPYVFIKRSDARTAPHGHVMVELVAELEGIQYGRSGETLGVLVPHVGEIPVAYRKVLLRKNGNKGAGGHSYGADLKSFDLGDELGTDPYEDFQENWNTKHSSGVTRELMRELNGGAYTRYVDNNFCGPDGYPLECIKDLLARAGKASCTLSEQLDFIDTKRGVYCCREHEHEIAWYTERSEKSYELQTPFEIKLAKKFDTFNGECPNFVFPLNSIIKTIQPRVEKKKLDGFMGRIRSVYPVASPNECNQMCLSTLMKCDHCGETSWQTGDFVKATCEFCGTENLTKEGATTCGYLPQNAVVKIYCPACHNSEVGPEHSLAEYHNESGLKTILRK…	mRNA#13684_1_copies:polyA_is_-1 coordinates are BetaCoV/England/02/2020; mRNA#35742_1_copies:polyA_is_-1 coordinates are BetaCoV/England/02/2020; mRNA#11782_1_copies:polyA_is_-1 coordinates are BetaCoV/England/02/2020; mRNA#23280_1_copies:polyA_is_-1 coordinates are BetaCoV/England/02/2020; mRNA#18463_1_copies:polyA_is_-1 coordinates are BetaCoV/England/02/2020; mRNA#35571_1_copies:polyA_is_-1 co…
SARS2_ORF1a	10	1957	1973	VTFFPDLNGDVVAIDYK	MESLVPGFNEKTHVQLSLPVLQVRDVLVRGFGDSVEEVLSEARQHLKDGTCGLVEVEKGVLPQLEQPYVFIKRSDARTAPHGHVMVELVAELEGIQYGRSGETLGVLVPHVGEIPVAYRKVLLRKNGNKGAGGHSYGADLKSFDLGDELGTDPYEDFQENWNTKHSSGVTRELMRELNGGAYTRYVDNNFCGPDGYPLECIKDLLARAGKASCTLSEQLDFIDTKRGVYCCREHEHEIAWYTERSEKSYELQTPFEIKLAKKFDTFNGECPNFVFPLNSIIKTIQPRVEKKKLDGFMGRIRSVYPVASPNECNQMCLSTLMKCDHCGETSWQTGDFVKATCEFCGTENLTKEGATTCGYLPQNAVVKIYCPACHNSEVGPEHSLAEYHNESGLKTILRK…	mRNA#13684_1_copies:polyA_is_-1 coordinates are BetaCoV/England/02/2020; mRNA#35742_1_copies:polyA_is_-1 coordinates are BetaCoV/England/02/2020; mRNA#11782_1_copies:polyA_is_-1 coordinates are BetaCoV/England/02/2020; mRNA#23280_1_copies:polyA_is_-1 coordinates are BetaCoV/England/02/2020; mRNA#18463_1_copies:polyA_is_-1 coordinates are BetaCoV/England/02/2020; mRNA#35571_1_copies:polyA_is_-1 co…
SARS2_ORF1a	6	1985	2000	LLHKPIVWHVNNATNK	MESLVPGFNEKTHVQLSLPVLQVRDVLVRGFGDSVEEVLSEARQHLKDGTCGLVEVEKGVLPQLEQPYVFIKRSDARTAPHGHVMVELVAELEGIQYGRSGETLGVLVPHVGEIPVAYRKVLLRKNGNKGAGGHSYGADLKSFDLGDELGTDPYEDFQENWNTKHSSGVTRELMRELNGGAYTRYVDNNFCGPDGYPLECIKDLLARAGKASCTLSEQLDFIDTKRGVYCCREHEHEIAWYTERSEKSYELQTPFEIKLAKKFDTFNGECPNFVFPLNSIIKTIQPRVEKKKLDGFMGRIRSVYPVASPNECNQMCLSTLMKCDHCGETSWQTGDFVKATCEFCGTENLTKEGATTCGYLPQNAVVKIYCPACHNSEVGPEHSLAEYHNESGLKTILRK…	mRNA#13684_1_copies:polyA_is_-1 coordinates are BetaCoV/England/02/2020; mRNA#35742_1_copies:polyA_is_-1 coordinates are BetaCoV/England/02/2020; mRNA#11782_1_copies:polyA_is_-1 coordinates are BetaCoV/England/02/2020; mRNA#23280_1_copies:polyA_is_-1 coordinates are BetaCoV/England/02/2020; mRNA#18463_1_copies:polyA_is_-1 coordinates are BetaCoV/England/02/2020; mRNA#35571_1_copies:polyA_is_-1 co…
SARS2_ORF1a	1	2001	2011	ATYKPNTWCIR	MESLVPGFNEKTHVQLSLPVLQVRDVLVRGFGDSVEEVLSEARQHLKDGTCGLVEVEKGVLPQLEQPYVFIKRSDARTAPHGHVMVELVAELEGIQYGRSGETLGVLVPHVGEIPVAYRKVLLRKNGNKGAGGHSYGADLKSFDLGDELGTDPYEDFQENWNTKHSSGVTRELMRELNGGAYTRYVDNNFCGPDGYPLECIKDLLARAGKASCTLSEQLDFIDTKRGVYCCREHEHEIAWYTERSEKSYELQTPFEIKLAKKFDTFNGECPNFVFPLNSIIKTIQPRVEKKKLDGFMGRIRSVYPVASPNECNQMCLSTLMKCDHCGETSWQTGDFVKATCEFCGTENLTKEGATTCGYLPQNAVVKIYCPACHNSEVGPEHSLAEYHNESGLKTILRK…	mRNA#13684_1_copies:polyA_is_-1 coordinates are BetaCoV/England/02/2020; mRNA#35742_1_copies:polyA_is_-1 coordinates are BetaCoV/England/02/2020; mRNA#11782_1_copies:polyA_is_-1 coordinates are BetaCoV/England/02/2020; mRNA#23280_1_copies:polyA_is_-1 coordinates are BetaCoV/England/02/2020; mRNA#18463_1_copies:polyA_is_-1 coordinates are BetaCoV/England/02/2020; mRNA#35571_1_copies:polyA_is_-1 co…
SARS2_ORF1a	6	2012	2029	CLWSTKPVETSNSFDVLK	MESLVPGFNEKTHVQLSLPVLQVRDVLVRGFGDSVEEVLSEARQHLKDGTCGLVEVEKGVLPQLEQPYVFIKRSDARTAPHGHVMVELVAELEGIQYGRSGETLGVLVPHVGEIPVAYRKVLLRKNGNKGAGGHSYGADLKSFDLGDELGTDPYEDFQENWNTKHSSGVTRELMRELNGGAYTRYVDNNFCGPDGYPLECIKDLLARAGKASCTLSEQLDFIDTKRGVYCCREHEHEIAWYTERSEKSYELQTPFEIKLAKKFDTFNGECPNFVFPLNSIIKTIQPRVEKKKLDGFMGRIRSVYPVASPNECNQMCLSTLMKCDHCGETSWQTGDFVKATCEFCGTENLTKEGATTCGYLPQNAVVKIYCPACHNSEVGPEHSLAEYHNESGLKTILRK…	mRNA#13684_1_copies:polyA_is_-1 coordinates are BetaCoV/England/02/2020; mRNA#35742_1_copies:polyA_is_-1 coordinates are BetaCoV/England/02/2020; mRNA#11782_1_copies:polyA_is_-1 coordinates are BetaCoV/England/02/2020; mRNA#23280_1_copies:polyA_is_-1 coordinates are BetaCoV/England/02/2020; mRNA#18463_1_copies:polyA_is_-1 coordinates are BetaCoV/England/02/2020; mRNA#35571_1_copies:polyA_is_-1 co…
SARS2_ORF1a	10	2030	2059	SEDAQGMDNLACEDLKPVSEEVVENPTIQK	MESLVPGFNEKTHVQLSLPVLQVRDVLVRGFGDSVEEVLSEARQHLKDGTCGLVEVEKGVLPQLEQPYVFIKRSDARTAPHGHVMVELVAELEGIQYGRSGETLGVLVPHVGEIPVAYRKVLLRKNGNKGAGGHSYGADLKSFDLGDELGTDPYEDFQENWNTKHSSGVTRELMRELNGGAYTRYVDNNFCGPDGYPLECIKDLLARAGKASCTLSEQLDFIDTKRGVYCCREHEHEIAWYTERSEKSYELQTPFEIKLAKKFDTFNGECPNFVFPLNSIIKTIQPRVEKKKLDGFMGRIRSVYPVASPNECNQMCLSTLMKCDHCGETSWQTGDFVKATCEFCGTENLTKEGATTCGYLPQNAVVKIYCPACHNSEVGPEHSLAEYHNESGLKTILRK…	mRNA#13684_1_copies:polyA_is_-1 coordinates are BetaCoV/England/02/2020; mRNA#35742_1_copies:polyA_is_-1 coordinates are BetaCoV/England/02/2020; mRNA#11782_1_copies:polyA_is_-1 coordinates are BetaCoV/England/02/2020; mRNA#23280_1_copies:polyA_is_-1 coordinates are BetaCoV/England/02/2020; mRNA#18463_1_copies:polyA_is_-1 coordinates are BetaCoV/England/02/2020; mRNA#35571_1_copies:polyA_is_-1 co…
SARS2_ORF1a	3	2060	2067	DVLECNVK	MESLVPGFNEKTHVQLSLPVLQVRDVLVRGFGDSVEEVLSEARQHLKDGTCGLVEVEKGVLPQLEQPYVFIKRSDARTAPHGHVMVELVAELEGIQYGRSGETLGVLVPHVGEIPVAYRKVLLRKNGNKGAGGHSYGADLKSFDLGDELGTDPYEDFQENWNTKHSSGVTRELMRELNGGAYTRYVDNNFCGPDGYPLECIKDLLARAGKASCTLSEQLDFIDTKRGVYCCREHEHEIAWYTERSEKSYELQTPFEIKLAKKFDTFNGECPNFVFPLNSIIKTIQPRVEKKKLDGFMGRIRSVYPVASPNECNQMCLSTLMKCDHCGETSWQTGDFVKATCEFCGTENLTKEGATTCGYLPQNAVVKIYCPACHNSEVGPEHSLAEYHNESGLKTILRK…	mRNA#13684_1_copies:polyA_is_-1 coordinates are BetaCoV/England/02/2020; mRNA#35742_1_copies:polyA_is_-1 coordinates are BetaCoV/England/02/2020; mRNA#11782_1_copies:polyA_is_-1 coordinates are BetaCoV/England/02/2020; mRNA#23280_1_copies:polyA_is_-1 coordinates are BetaCoV/England/02/2020; mRNA#18463_1_copies:polyA_is_-1 coordinates are BetaCoV/England/02/2020; mRNA#35571_1_copies:polyA_is_-1 co…
SARS2_ORF1a	10	2068	2085	TTEVVGDIILKPANNSLK	MESLVPGFNEKTHVQLSLPVLQVRDVLVRGFGDSVEEVLSEARQHLKDGTCGLVEVEKGVLPQLEQPYVFIKRSDARTAPHGHVMVELVAELEGIQYGRSGETLGVLVPHVGEIPVAYRKVLLRKNGNKGAGGHSYGADLKSFDLGDELGTDPYEDFQENWNTKHSSGVTRELMRELNGGAYTRYVDNNFCGPDGYPLECIKDLLARAGKASCTLSEQLDFIDTKRGVYCCREHEHEIAWYTERSEKSYELQTPFEIKLAKKFDTFNGECPNFVFPLNSIIKTIQPRVEKKKLDGFMGRIRSVYPVASPNECNQMCLSTLMKCDHCGETSWQTGDFVKATCEFCGTENLTKEGATTCGYLPQNAVVKIYCPACHNSEVGPEHSLAEYHNESGLKTILRK…	mRNA#13684_1_copies:polyA_is_-1 coordinates are BetaCoV/England/02/2020; mRNA#35742_1_copies:polyA_is_-1 coordinates are BetaCoV/England/02/2020; mRNA#11782_1_copies:polyA_is_-1 coordinates are BetaCoV/England/02/2020; mRNA#23280_1_copies:polyA_is_-1 coordinates are BetaCoV/England/02/2020; mRNA#18463_1_copies:polyA_is_-1 coordinates are BetaCoV/England/02/2020; mRNA#35571_1_copies:polyA_is_-1 co…
SARS2_ORF1a	8	2086	2108	ITEEVGHTDLMAAYVDNSSLTIK	MESLVPGFNEKTHVQLSLPVLQVRDVLVRGFGDSVEEVLSEARQHLKDGTCGLVEVEKGVLPQLEQPYVFIKRSDARTAPHGHVMVELVAELEGIQYGRSGETLGVLVPHVGEIPVAYRKVLLRKNGNKGAGGHSYGADLKSFDLGDELGTDPYEDFQENWNTKHSSGVTRELMRELNGGAYTRYVDNNFCGPDGYPLECIKDLLARAGKASCTLSEQLDFIDTKRGVYCCREHEHEIAWYTERSEKSYELQTPFEIKLAKKFDTFNGECPNFVFPLNSIIKTIQPRVEKKKLDGFMGRIRSVYPVASPNECNQMCLSTLMKCDHCGETSWQTGDFVKATCEFCGTENLTKEGATTCGYLPQNAVVKIYCPACHNSEVGPEHSLAEYHNESGLKTILRK…	mRNA#13684_1_copies:polyA_is_-1 coordinates are BetaCoV/England/02/2020; mRNA#35742_1_copies:polyA_is_-1 coordinates are BetaCoV/England/02/2020; mRNA#11782_1_copies:polyA_is_-1 coordinates are BetaCoV/England/02/2020; mRNA#23280_1_copies:polyA_is_-1 coordinates are BetaCoV/England/02/2020; mRNA#18463_1_copies:polyA_is_-1 coordinates are BetaCoV/England/02/2020; mRNA#35571_1_copies:polyA_is_-1 co…
SARS2_ORF1a	12	2149	2159	VVSTTTNIVTR	MESLVPGFNEKTHVQLSLPVLQVRDVLVRGFGDSVEEVLSEARQHLKDGTCGLVEVEKGVLPQLEQPYVFIKRSDARTAPHGHVMVELVAELEGIQYGRSGETLGVLVPHVGEIPVAYRKVLLRKNGNKGAGGHSYGADLKSFDLGDELGTDPYEDFQENWNTKHSSGVTRELMRELNGGAYTRYVDNNFCGPDGYPLECIKDLLARAGKASCTLSEQLDFIDTKRGVYCCREHEHEIAWYTERSEKSYELQTPFEIKLAKKFDTFNGECPNFVFPLNSIIKTIQPRVEKKKLDGFMGRIRSVYPVASPNECNQMCLSTLMKCDHCGETSWQTGDFVKATCEFCGTENLTKEGATTCGYLPQNAVVKIYCPACHNSEVGPEHSLAEYHNESGLKTILRK…	mRNA#35742_1_copies:polyA_is_-1 coordinates are BetaCoV/England/02/2020; mRNA#11782_1_copies:polyA_is_-1 coordinates are BetaCoV/England/02/2020; mRNA#39903_1_copies:polyA_is_-1 coordinates are BetaCoV/England/02/2020; mRNA#47029_1_copies:polyA_is_-1 coordinates are BetaCoV/England/02/2020; mRNA#18463_1_copies:polyA_is_-1 coordinates are BetaCoV/England/02/2020; mRNA#35571_1_copies:polyA_is_-1 co…
SARS2_ORF1a	4	2192	2200	ASMPTTIAK	MESLVPGFNEKTHVQLSLPVLQVRDVLVRGFGDSVEEVLSEARQHLKDGTCGLVEVEKGVLPQLEQPYVFIKRSDARTAPHGHVMVELVAELEGIQYGRSGETLGVLVPHVGEIPVAYRKVLLRKNGNKGAGGHSYGADLKSFDLGDELGTDPYEDFQENWNTKHSSGVTRELMRELNGGAYTRYVDNNFCGPDGYPLECIKDLLARAGKASCTLSEQLDFIDTKRGVYCCREHEHEIAWYTERSEKSYELQTPFEIKLAKKFDTFNGECPNFVFPLNSIIKTIQPRVEKKKLDGFMGRIRSVYPVASPNECNQMCLSTLMKCDHCGETSWQTGDFVKATCEFCGTENLTKEGATTCGYLPQNAVVKIYCPACHNSEVGPEHSLAEYHNESGLKTILRK…	mRNA#40234_1_copies:polyA_is_-1 coordinates are BetaCoV/England/02/2020; mRNA#35742_1_copies:polyA_is_-1 coordinates are BetaCoV/England/02/2020; mRNA#11782_1_copies:polyA_is_-1 coordinates are BetaCoV/England/02/2020; mRNA#39903_1_copies:polyA_is_-1 coordinates are BetaCoV/England/02/2020; mRNA#18463_1_copies:polyA_is_-1 coordinates are BetaCoV/England/02/2020; mRNA#14301_1_copies:polyA_is_-1 co…
SARS2_ORF1a	1	2209	2219	FCLEASFNYLK	MESLVPGFNEKTHVQLSLPVLQVRDVLVRGFGDSVEEVLSEARQHLKDGTCGLVEVEKGVLPQLEQPYVFIKRSDARTAPHGHVMVELVAELEGIQYGRSGETLGVLVPHVGEIPVAYRKVLLRKNGNKGAGGHSYGADLKSFDLGDELGTDPYEDFQENWNTKHSSGVTRELMRELNGGAYTRYVDNNFCGPDGYPLECIKDLLARAGKASCTLSEQLDFIDTKRGVYCCREHEHEIAWYTERSEKSYELQTPFEIKLAKKFDTFNGECPNFVFPLNSIIKTIQPRVEKKKLDGFMGRIRSVYPVASPNECNQMCLSTLMKCDHCGETSWQTGDFVKATCEFCGTENLTKEGATTCGYLPQNAVVKIYCPACHNSEVGPEHSLAEYHNESGLKTILRK…	mRNA#40234_1_copies:polyA_is_-1 coordinates are BetaCoV/England/02/2020; mRNA#35742_1_copies:polyA_is_-1 coordinates are BetaCoV/England/02/2020; mRNA#11782_1_copies:polyA_is_-1 coordinates are BetaCoV/England/02/2020; mRNA#39903_1_copies:polyA_is_-1 coordinates are BetaCoV/England/02/2020; mRNA#18463_1_copies:polyA_is_-1 coordinates are BetaCoV/England/02/2020; mRNA#14301_1_copies:polyA_is_-1 co…
SARS2_ORF1a	5	2421	2431	VECTTIVNGVR	MESLVPGFNEKTHVQLSLPVLQVRDVLVRGFGDSVEEVLSEARQHLKDGTCGLVEVEKGVLPQLEQPYVFIKRSDARTAPHGHVMVELVAELEGIQYGRSGETLGVLVPHVGEIPVAYRKVLLRKNGNKGAGGHSYGADLKSFDLGDELGTDPYEDFQENWNTKHSSGVTRELMRELNGGAYTRYVDNNFCGPDGYPLECIKDLLARAGKASCTLSEQLDFIDTKRGVYCCREHEHEIAWYTERSEKSYELQTPFEIKLAKKFDTFNGECPNFVFPLNSIIKTIQPRVEKKKLDGFMGRIRSVYPVASPNECNQMCLSTLMKCDHCGETSWQTGDFVKATCEFCGTENLTKEGATTCGYLPQNAVVKIYCPACHNSEVGPEHSLAEYHNESGLKTILRK…	mRNA#56874_1_copies:polyA_is_-1 coordinates are BetaCoV/England/02/2020; mRNA#35742_1_copies:polyA_is_-1 coordinates are BetaCoV/England/02/2020; mRNA#11782_1_copies:polyA_is_-1 coordinates are BetaCoV/England/02/2020; mRNA#37869_1_copies:polyA_is_-1 coordinates are BetaCoV/England/02/2020; mRNA#24795_1_copies:polyA_is_-1 coordinates are BetaCoV/England/02/2020; mRNA#39304_1_copies:polyA_is_-1 co…
SARS2_ORF1a	9	2433	2442	SFYVYANGGK	MESLVPGFNEKTHVQLSLPVLQVRDVLVRGFGDSVEEVLSEARQHLKDGTCGLVEVEKGVLPQLEQPYVFIKRSDARTAPHGHVMVELVAELEGIQYGRSGETLGVLVPHVGEIPVAYRKVLLRKNGNKGAGGHSYGADLKSFDLGDELGTDPYEDFQENWNTKHSSGVTRELMRELNGGAYTRYVDNNFCGPDGYPLECIKDLLARAGKASCTLSEQLDFIDTKRGVYCCREHEHEIAWYTERSEKSYELQTPFEIKLAKKFDTFNGECPNFVFPLNSIIKTIQPRVEKKKLDGFMGRIRSVYPVASPNECNQMCLSTLMKCDHCGETSWQTGDFVKATCEFCGTENLTKEGATTCGYLPQNAVVKIYCPACHNSEVGPEHSLAEYHNESGLKTILRK…	mRNA#56874_1_copies:polyA_is_-1 coordinates are BetaCoV/England/02/2020; mRNA#35742_1_copies:polyA_is_-1 coordinates are BetaCoV/England/02/2020; mRNA#11782_1_copies:polyA_is_-1 coordinates are BetaCoV/England/02/2020; mRNA#37869_1_copies:polyA_is_-1 coordinates are BetaCoV/England/02/2020; mRNA#24795_1_copies:polyA_is_-1 coordinates are BetaCoV/England/02/2020; mRNA#39304_1_copies:polyA_is_-1 co…
SARS2_ORF1a	1	2447	2471	LHNWNCVNCDTFCAGSTFISDEVAR	MESLVPGFNEKTHVQLSLPVLQVRDVLVRGFGDSVEEVLSEARQHLKDGTCGLVEVEKGVLPQLEQPYVFIKRSDARTAPHGHVMVELVAELEGIQYGRSGETLGVLVPHVGEIPVAYRKVLLRKNGNKGAGGHSYGADLKSFDLGDELGTDPYEDFQENWNTKHSSGVTRELMRELNGGAYTRYVDNNFCGPDGYPLECIKDLLARAGKASCTLSEQLDFIDTKRGVYCCREHEHEIAWYTERSEKSYELQTPFEIKLAKKFDTFNGECPNFVFPLNSIIKTIQPRVEKKKLDGFMGRIRSVYPVASPNECNQMCLSTLMKCDHCGETSWQTGDFVKATCEFCGTENLTKEGATTCGYLPQNAVVKIYCPACHNSEVGPEHSLAEYHNESGLKTILRK…	mRNA#56874_1_copies:polyA_is_-1 coordinates are BetaCoV/England/02/2020; mRNA#35742_1_copies:polyA_is_-1 coordinates are BetaCoV/England/02/2020; mRNA#11782_1_copies:polyA_is_-1 coordinates are BetaCoV/England/02/2020; mRNA#37869_1_copies:polyA_is_-1 coordinates are BetaCoV/England/02/2020; mRNA#24795_1_copies:polyA_is_-1 coordinates are BetaCoV/England/02/2020; mRNA#39304_1_copies:polyA_is_-1 co…
SARS2_ORF1a	3	2472	2478	DLSLQFK	MESLVPGFNEKTHVQLSLPVLQVRDVLVRGFGDSVEEVLSEARQHLKDGTCGLVEVEKGVLPQLEQPYVFIKRSDARTAPHGHVMVELVAELEGIQYGRSGETLGVLVPHVGEIPVAYRKVLLRKNGNKGAGGHSYGADLKSFDLGDELGTDPYEDFQENWNTKHSSGVTRELMRELNGGAYTRYVDNNFCGPDGYPLECIKDLLARAGKASCTLSEQLDFIDTKRGVYCCREHEHEIAWYTERSEKSYELQTPFEIKLAKKFDTFNGECPNFVFPLNSIIKTIQPRVEKKKLDGFMGRIRSVYPVASPNECNQMCLSTLMKCDHCGETSWQTGDFVKATCEFCGTENLTKEGATTCGYLPQNAVVKIYCPACHNSEVGPEHSLAEYHNESGLKTILRK…	mRNA#56874_1_copies:polyA_is_-1 coordinates are BetaCoV/England/02/2020; mRNA#35742_1_copies:polyA_is_-1 coordinates are BetaCoV/England/02/2020; mRNA#11782_1_copies:polyA_is_-1 coordinates are BetaCoV/England/02/2020; mRNA#37869_1_copies:polyA_is_-1 coordinates are BetaCoV/England/02/2020; mRNA#24795_1_copies:polyA_is_-1 coordinates are BetaCoV/England/02/2020; mRNA#39304_1_copies:polyA_is_-1 co…
SARS2_ORF1a	14	2479	2497	RPINPTDQSSYIVDSVTVK	MESLVPGFNEKTHVQLSLPVLQVRDVLVRGFGDSVEEVLSEARQHLKDGTCGLVEVEKGVLPQLEQPYVFIKRSDARTAPHGHVMVELVAELEGIQYGRSGETLGVLVPHVGEIPVAYRKVLLRKNGNKGAGGHSYGADLKSFDLGDELGTDPYEDFQENWNTKHSSGVTRELMRELNGGAYTRYVDNNFCGPDGYPLECIKDLLARAGKASCTLSEQLDFIDTKRGVYCCREHEHEIAWYTERSEKSYELQTPFEIKLAKKFDTFNGECPNFVFPLNSIIKTIQPRVEKKKLDGFMGRIRSVYPVASPNECNQMCLSTLMKCDHCGETSWQTGDFVKATCEFCGTENLTKEGATTCGYLPQNAVVKIYCPACHNSEVGPEHSLAEYHNESGLKTILRK…	mRNA#35742_1_copies:polyA_is_-1 coordinates are BetaCoV/England/02/2020; mRNA#11782_1_copies:polyA_is_-1 coordinates are BetaCoV/England/02/2020; mRNA#37869_1_copies:polyA_is_-1 coordinates are BetaCoV/England/02/2020; mRNA#24795_1_copies:polyA_is_-1 coordinates are BetaCoV/England/02/2020; mRNA#39304_1_copies:polyA_is_-1 coordinates are BetaCoV/England/02/2020; mRNA#71765_1_copies:polyA_is_-1 co…
SARS2_ORF1a	8	2498	2507	NGSIHLYFDK	MESLVPGFNEKTHVQLSLPVLQVRDVLVRGFGDSVEEVLSEARQHLKDGTCGLVEVEKGVLPQLEQPYVFIKRSDARTAPHGHVMVELVAELEGIQYGRSGETLGVLVPHVGEIPVAYRKVLLRKNGNKGAGGHSYGADLKSFDLGDELGTDPYEDFQENWNTKHSSGVTRELMRELNGGAYTRYVDNNFCGPDGYPLECIKDLLARAGKASCTLSEQLDFIDTKRGVYCCREHEHEIAWYTERSEKSYELQTPFEIKLAKKFDTFNGECPNFVFPLNSIIKTIQPRVEKKKLDGFMGRIRSVYPVASPNECNQMCLSTLMKCDHCGETSWQTGDFVKATCEFCGTENLTKEGATTCGYLPQNAVVKIYCPACHNSEVGPEHSLAEYHNESGLKTILRK…	mRNA#35742_1_copies:polyA_is_-1 coordinates are BetaCoV/England/02/2020; mRNA#11782_1_copies:polyA_is_-1 coordinates are BetaCoV/England/02/2020; mRNA#37869_1_copies:polyA_is_-1 coordinates are BetaCoV/England/02/2020; mRNA#24795_1_copies:polyA_is_-1 coordinates are BetaCoV/England/02/2020; mRNA#39304_1_copies:polyA_is_-1 coordinates are BetaCoV/England/02/2020; mRNA#71765_1_copies:polyA_is_-1 co…
SARS2_ORF1a	22	2516	2528	HSLSHFVNLDNLR	MESLVPGFNEKTHVQLSLPVLQVRDVLVRGFGDSVEEVLSEARQHLKDGTCGLVEVEKGVLPQLEQPYVFIKRSDARTAPHGHVMVELVAELEGIQYGRSGETLGVLVPHVGEIPVAYRKVLLRKNGNKGAGGHSYGADLKSFDLGDELGTDPYEDFQENWNTKHSSGVTRELMRELNGGAYTRYVDNNFCGPDGYPLECIKDLLARAGKASCTLSEQLDFIDTKRGVYCCREHEHEIAWYTERSEKSYELQTPFEIKLAKKFDTFNGECPNFVFPLNSIIKTIQPRVEKKKLDGFMGRIRSVYPVASPNECNQMCLSTLMKCDHCGETSWQTGDFVKATCEFCGTENLTKEGATTCGYLPQNAVVKIYCPACHNSEVGPEHSLAEYHNESGLKTILRK…	mRNA#35742_1_copies:polyA_is_-1 coordinates are BetaCoV/England/02/2020; mRNA#11782_1_copies:polyA_is_-1 coordinates are BetaCoV/England/02/2020; mRNA#37869_1_copies:polyA_is_-1 coordinates are BetaCoV/England/02/2020; mRNA#24795_1_copies:polyA_is_-1 coordinates are BetaCoV/England/02/2020; mRNA#39304_1_copies:polyA_is_-1 coordinates are BetaCoV/England/02/2020; mRNA#71765_1_copies:polyA_is_-1 co…
SARS2_ORF1a	12	2534	2546	GSLPINVIVFDGK	MESLVPGFNEKTHVQLSLPVLQVRDVLVRGFGDSVEEVLSEARQHLKDGTCGLVEVEKGVLPQLEQPYVFIKRSDARTAPHGHVMVELVAELEGIQYGRSGETLGVLVPHVGEIPVAYRKVLLRKNGNKGAGGHSYGADLKSFDLGDELGTDPYEDFQENWNTKHSSGVTRELMRELNGGAYTRYVDNNFCGPDGYPLECIKDLLARAGKASCTLSEQLDFIDTKRGVYCCREHEHEIAWYTERSEKSYELQTPFEIKLAKKFDTFNGECPNFVFPLNSIIKTIQPRVEKKKLDGFMGRIRSVYPVASPNECNQMCLSTLMKCDHCGETSWQTGDFVKATCEFCGTENLTKEGATTCGYLPQNAVVKIYCPACHNSEVGPEHSLAEYHNESGLKTILRK…	mRNA#35742_1_copies:polyA_is_-1 coordinates are BetaCoV/England/02/2020; mRNA#11782_1_copies:polyA_is_-1 coordinates are BetaCoV/England/02/2020; mRNA#24795_1_copies:polyA_is_-1 coordinates are BetaCoV/England/02/2020; mRNA#39304_1_copies:polyA_is_-1 coordinates are BetaCoV/England/02/2020; mRNA#71765_1_copies:polyA_is_-1 coordinates are BetaCoV/England/02/2020; mRNA#33202_1_copies:polyA_is_-1 co…
SARS2_ORF1a	10	2590	2608	MFDAYVNTFSSTFNVPMEK	MESLVPGFNEKTHVQLSLPVLQVRDVLVRGFGDSVEEVLSEARQHLKDGTCGLVEVEKGVLPQLEQPYVFIKRSDARTAPHGHVMVELVAELEGIQYGRSGETLGVLVPHVGEIPVAYRKVLLRKNGNKGAGGHSYGADLKSFDLGDELGTDPYEDFQENWNTKHSSGVTRELMRELNGGAYTRYVDNNFCGPDGYPLECIKDLLARAGKASCTLSEQLDFIDTKRGVYCCREHEHEIAWYTERSEKSYELQTPFEIKLAKKFDTFNGECPNFVFPLNSIIKTIQPRVEKKKLDGFMGRIRSVYPVASPNECNQMCLSTLMKCDHCGETSWQTGDFVKATCEFCGTENLTKEGATTCGYLPQNAVVKIYCPACHNSEVGPEHSLAEYHNESGLKTILRK…	mRNA#35742_1_copies:polyA_is_-1 coordinates are BetaCoV/England/02/2020; mRNA#11782_1_copies:polyA_is_-1 coordinates are BetaCoV/England/02/2020; mRNA#24795_1_copies:polyA_is_-1 coordinates are BetaCoV/England/02/2020; mRNA#39304_1_copies:polyA_is_-1 coordinates are BetaCoV/England/02/2020; mRNA#71765_1_copies:polyA_is_-1 coordinates are BetaCoV/England/02/2020; mRNA#33202_1_copies:polyA_is_-1 co…
SARS2_ORF1a	2	2609	2622	LKTLVATAEAELAK	MESLVPGFNEKTHVQLSLPVLQVRDVLVRGFGDSVEEVLSEARQHLKDGTCGLVEVEKGVLPQLEQPYVFIKRSDARTAPHGHVMVELVAELEGIQYGRSGETLGVLVPHVGEIPVAYRKVLLRKNGNKGAGGHSYGADLKSFDLGDELGTDPYEDFQENWNTKHSSGVTRELMRELNGGAYTRYVDNNFCGPDGYPLECIKDLLARAGKASCTLSEQLDFIDTKRGVYCCREHEHEIAWYTERSEKSYELQTPFEIKLAKKFDTFNGECPNFVFPLNSIIKTIQPRVEKKKLDGFMGRIRSVYPVASPNECNQMCLSTLMKCDHCGETSWQTGDFVKATCEFCGTENLTKEGATTCGYLPQNAVVKIYCPACHNSEVGPEHSLAEYHNESGLKTILRK…	mRNA#35742_1_copies:polyA_is_-1 coordinates are BetaCoV/England/02/2020; mRNA#11782_1_copies:polyA_is_-1 coordinates are BetaCoV/England/02/2020; mRNA#24795_1_copies:polyA_is_-1 coordinates are BetaCoV/England/02/2020; mRNA#39304_1_copies:polyA_is_-1 coordinates are BetaCoV/England/02/2020; mRNA#71765_1_copies:polyA_is_-1 coordinates are BetaCoV/England/02/2020; mRNA#33202_1_copies:polyA_is_-1 co…
SARS2_ORF1a	13	2611	2622	TLVATAEAELAK	MESLVPGFNEKTHVQLSLPVLQVRDVLVRGFGDSVEEVLSEARQHLKDGTCGLVEVEKGVLPQLEQPYVFIKRSDARTAPHGHVMVELVAELEGIQYGRSGETLGVLVPHVGEIPVAYRKVLLRKNGNKGAGGHSYGADLKSFDLGDELGTDPYEDFQENWNTKHSSGVTRELMRELNGGAYTRYVDNNFCGPDGYPLECIKDLLARAGKASCTLSEQLDFIDTKRGVYCCREHEHEIAWYTERSEKSYELQTPFEIKLAKKFDTFNGECPNFVFPLNSIIKTIQPRVEKKKLDGFMGRIRSVYPVASPNECNQMCLSTLMKCDHCGETSWQTGDFVKATCEFCGTENLTKEGATTCGYLPQNAVVKIYCPACHNSEVGPEHSLAEYHNESGLKTILRK…	mRNA#35742_1_copies:polyA_is_-1 coordinates are BetaCoV/England/02/2020; mRNA#11782_1_copies:polyA_is_-1 coordinates are BetaCoV/England/02/2020; mRNA#24795_1_copies:polyA_is_-1 coordinates are BetaCoV/England/02/2020; mRNA#39304_1_copies:polyA_is_-1 coordinates are BetaCoV/England/02/2020; mRNA#71765_1_copies:polyA_is_-1 coordinates are BetaCoV/England/02/2020; mRNA#33202_1_copies:polyA_is_-1 co…
SARS2_ORF1a	28	2623	2638	NVSLDNVLSTFISAAR	MESLVPGFNEKTHVQLSLPVLQVRDVLVRGFGDSVEEVLSEARQHLKDGTCGLVEVEKGVLPQLEQPYVFIKRSDARTAPHGHVMVELVAELEGIQYGRSGETLGVLVPHVGEIPVAYRKVLLRKNGNKGAGGHSYGADLKSFDLGDELGTDPYEDFQENWNTKHSSGVTRELMRELNGGAYTRYVDNNFCGPDGYPLECIKDLLARAGKASCTLSEQLDFIDTKRGVYCCREHEHEIAWYTERSEKSYELQTPFEIKLAKKFDTFNGECPNFVFPLNSIIKTIQPRVEKKKLDGFMGRIRSVYPVASPNECNQMCLSTLMKCDHCGETSWQTGDFVKATCEFCGTENLTKEGATTCGYLPQNAVVKIYCPACHNSEVGPEHSLAEYHNESGLKTILRK…	mRNA#35742_1_copies:polyA_is_-1 coordinates are BetaCoV/England/02/2020; mRNA#11782_1_copies:polyA_is_-1 coordinates are BetaCoV/England/02/2020; mRNA#24795_1_copies:polyA_is_-1 coordinates are BetaCoV/England/02/2020; mRNA#39304_1_copies:polyA_is_-1 coordinates are BetaCoV/England/02/2020; mRNA#71765_1_copies:polyA_is_-1 coordinates are BetaCoV/England/02/2020; mRNA#33202_1_copies:polyA_is_-1 co…
SARS2_ORF1a	8	2639	2649	QGFVDSDVETK	MESLVPGFNEKTHVQLSLPVLQVRDVLVRGFGDSVEEVLSEARQHLKDGTCGLVEVEKGVLPQLEQPYVFIKRSDARTAPHGHVMVELVAELEGIQYGRSGETLGVLVPHVGEIPVAYRKVLLRKNGNKGAGGHSYGADLKSFDLGDELGTDPYEDFQENWNTKHSSGVTRELMRELNGGAYTRYVDNNFCGPDGYPLECIKDLLARAGKASCTLSEQLDFIDTKRGVYCCREHEHEIAWYTERSEKSYELQTPFEIKLAKKFDTFNGECPNFVFPLNSIIKTIQPRVEKKKLDGFMGRIRSVYPVASPNECNQMCLSTLMKCDHCGETSWQTGDFVKATCEFCGTENLTKEGATTCGYLPQNAVVKIYCPACHNSEVGPEHSLAEYHNESGLKTILRK…	mRNA#35742_1_copies:polyA_is_-1 coordinates are BetaCoV/England/02/2020; mRNA#11782_1_copies:polyA_is_-1 coordinates are BetaCoV/England/02/2020; mRNA#24795_1_copies:polyA_is_-1 coordinates are BetaCoV/England/02/2020; mRNA#39304_1_copies:polyA_is_-1 coordinates are BetaCoV/England/02/2020; mRNA#71765_1_copies:polyA_is_-1 coordinates are BetaCoV/England/02/2020; mRNA#33202_1_copies:polyA_is_-1 co…
SARS2_ORF1a	2	2639	2656	QGFVDSDVETKDVVECLK	MESLVPGFNEKTHVQLSLPVLQVRDVLVRGFGDSVEEVLSEARQHLKDGTCGLVEVEKGVLPQLEQPYVFIKRSDARTAPHGHVMVELVAELEGIQYGRSGETLGVLVPHVGEIPVAYRKVLLRKNGNKGAGGHSYGADLKSFDLGDELGTDPYEDFQENWNTKHSSGVTRELMRELNGGAYTRYVDNNFCGPDGYPLECIKDLLARAGKASCTLSEQLDFIDTKRGVYCCREHEHEIAWYTERSEKSYELQTPFEIKLAKKFDTFNGECPNFVFPLNSIIKTIQPRVEKKKLDGFMGRIRSVYPVASPNECNQMCLSTLMKCDHCGETSWQTGDFVKATCEFCGTENLTKEGATTCGYLPQNAVVKIYCPACHNSEVGPEHSLAEYHNESGLKTILRK…	mRNA#35742_1_copies:polyA_is_-1 coordinates are BetaCoV/England/02/2020; mRNA#11782_1_copies:polyA_is_-1 coordinates are BetaCoV/England/02/2020; mRNA#24795_1_copies:polyA_is_-1 coordinates are BetaCoV/England/02/2020; mRNA#39304_1_copies:polyA_is_-1 coordinates are BetaCoV/England/02/2020; mRNA#71765_1_copies:polyA_is_-1 coordinates are BetaCoV/England/02/2020; mRNA#33202_1_copies:polyA_is_-1 co…
SARS2_ORF1a	1	2657	2679	LSHQSDIEVTGDSCNNYMLTYNK	MESLVPGFNEKTHVQLSLPVLQVRDVLVRGFGDSVEEVLSEARQHLKDGTCGLVEVEKGVLPQLEQPYVFIKRSDARTAPHGHVMVELVAELEGIQYGRSGETLGVLVPHVGEIPVAYRKVLLRKNGNKGAGGHSYGADLKSFDLGDELGTDPYEDFQENWNTKHSSGVTRELMRELNGGAYTRYVDNNFCGPDGYPLECIKDLLARAGKASCTLSEQLDFIDTKRGVYCCREHEHEIAWYTERSEKSYELQTPFEIKLAKKFDTFNGECPNFVFPLNSIIKTIQPRVEKKKLDGFMGRIRSVYPVASPNECNQMCLSTLMKCDHCGETSWQTGDFVKATCEFCGTENLTKEGATTCGYLPQNAVVKIYCPACHNSEVGPEHSLAEYHNESGLKTILRK…	mRNA#35742_1_copies:polyA_is_-1 coordinates are BetaCoV/England/02/2020; mRNA#11782_1_copies:polyA_is_-1 coordinates are BetaCoV/England/02/2020; mRNA#24795_1_copies:polyA_is_-1 coordinates are BetaCoV/England/02/2020; mRNA#39304_1_copies:polyA_is_-1 coordinates are BetaCoV/England/02/2020; mRNA#71765_1_copies:polyA_is_-1 coordinates are BetaCoV/England/02/2020; mRNA#33202_1_copies:polyA_is_-1 co…
SARS2_ORF1a	8	2687	2697	DLGACIDCSAR	MESLVPGFNEKTHVQLSLPVLQVRDVLVRGFGDSVEEVLSEARQHLKDGTCGLVEVEKGVLPQLEQPYVFIKRSDARTAPHGHVMVELVAELEGIQYGRSGETLGVLVPHVGEIPVAYRKVLLRKNGNKGAGGHSYGADLKSFDLGDELGTDPYEDFQENWNTKHSSGVTRELMRELNGGAYTRYVDNNFCGPDGYPLECIKDLLARAGKASCTLSEQLDFIDTKRGVYCCREHEHEIAWYTERSEKSYELQTPFEIKLAKKFDTFNGECPNFVFPLNSIIKTIQPRVEKKKLDGFMGRIRSVYPVASPNECNQMCLSTLMKCDHCGETSWQTGDFVKATCEFCGTENLTKEGATTCGYLPQNAVVKIYCPACHNSEVGPEHSLAEYHNESGLKTILRK…	mRNA#35742_1_copies:polyA_is_-1 coordinates are BetaCoV/England/02/2020; mRNA#11782_1_copies:polyA_is_-1 coordinates are BetaCoV/England/02/2020; mRNA#24795_1_copies:polyA_is_-1 coordinates are BetaCoV/England/02/2020; mRNA#71765_1_copies:polyA_is_-1 coordinates are BetaCoV/England/02/2020; mRNA#33202_1_copies:polyA_is_-1 coordinates are BetaCoV/England/02/2020; mRNA#60356_1_copies:polyA_is_-1 co…
SARS2_ORF1a	4	2706	2716	SHNIALIWNVK	MESLVPGFNEKTHVQLSLPVLQVRDVLVRGFGDSVEEVLSEARQHLKDGTCGLVEVEKGVLPQLEQPYVFIKRSDARTAPHGHVMVELVAELEGIQYGRSGETLGVLVPHVGEIPVAYRKVLLRKNGNKGAGGHSYGADLKSFDLGDELGTDPYEDFQENWNTKHSSGVTRELMRELNGGAYTRYVDNNFCGPDGYPLECIKDLLARAGKASCTLSEQLDFIDTKRGVYCCREHEHEIAWYTERSEKSYELQTPFEIKLAKKFDTFNGECPNFVFPLNSIIKTIQPRVEKKKLDGFMGRIRSVYPVASPNECNQMCLSTLMKCDHCGETSWQTGDFVKATCEFCGTENLTKEGATTCGYLPQNAVVKIYCPACHNSEVGPEHSLAEYHNESGLKTILRK…	mRNA#35742_1_copies:polyA_is_-1 coordinates are BetaCoV/England/02/2020; mRNA#11782_1_copies:polyA_is_-1 coordinates are BetaCoV/England/02/2020; mRNA#24795_1_copies:polyA_is_-1 coordinates are BetaCoV/England/02/2020; mRNA#71765_1_copies:polyA_is_-1 coordinates are BetaCoV/England/02/2020; mRNA#60356_1_copies:polyA_is_-1 coordinates are BetaCoV/England/02/2020; mRNA#15232_1_copies:polyA_is_-1 co…
SARS2_ORF1a	12	2717	2726	DFMSLSEQLR	MESLVPGFNEKTHVQLSLPVLQVRDVLVRGFGDSVEEVLSEARQHLKDGTCGLVEVEKGVLPQLEQPYVFIKRSDARTAPHGHVMVELVAELEGIQYGRSGETLGVLVPHVGEIPVAYRKVLLRKNGNKGAGGHSYGADLKSFDLGDELGTDPYEDFQENWNTKHSSGVTRELMRELNGGAYTRYVDNNFCGPDGYPLECIKDLLARAGKASCTLSEQLDFIDTKRGVYCCREHEHEIAWYTERSEKSYELQTPFEIKLAKKFDTFNGECPNFVFPLNSIIKTIQPRVEKKKLDGFMGRIRSVYPVASPNECNQMCLSTLMKCDHCGETSWQTGDFVKATCEFCGTENLTKEGATTCGYLPQNAVVKIYCPACHNSEVGPEHSLAEYHNESGLKTILRK…	mRNA#35742_1_copies:polyA_is_-1 coordinates are BetaCoV/England/02/2020; mRNA#11782_1_copies:polyA_is_-1 coordinates are BetaCoV/England/02/2020; mRNA#24795_1_copies:polyA_is_-1 coordinates are BetaCoV/England/02/2020; mRNA#71765_1_copies:polyA_is_-1 coordinates are BetaCoV/England/02/2020; mRNA#60356_1_copies:polyA_is_-1 coordinates are BetaCoV/England/02/2020; mRNA#15232_1_copies:polyA_is_-1 co…
SARS2_ORF1a	2	2717	2727	DFMSLSEQLRK	MESLVPGFNEKTHVQLSLPVLQVRDVLVRGFGDSVEEVLSEARQHLKDGTCGLVEVEKGVLPQLEQPYVFIKRSDARTAPHGHVMVELVAELEGIQYGRSGETLGVLVPHVGEIPVAYRKVLLRKNGNKGAGGHSYGADLKSFDLGDELGTDPYEDFQENWNTKHSSGVTRELMRELNGGAYTRYVDNNFCGPDGYPLECIKDLLARAGKASCTLSEQLDFIDTKRGVYCCREHEHEIAWYTERSEKSYELQTPFEIKLAKKFDTFNGECPNFVFPLNSIIKTIQPRVEKKKLDGFMGRIRSVYPVASPNECNQMCLSTLMKCDHCGETSWQTGDFVKATCEFCGTENLTKEGATTCGYLPQNAVVKIYCPACHNSEVGPEHSLAEYHNESGLKTILRK…	mRNA#35742_1_copies:polyA_is_-1 coordinates are BetaCoV/England/02/2020; mRNA#11782_1_copies:polyA_is_-1 coordinates are BetaCoV/England/02/2020; mRNA#24795_1_copies:polyA_is_-1 coordinates are BetaCoV/England/02/2020; mRNA#71765_1_copies:polyA_is_-1 coordinates are BetaCoV/England/02/2020; mRNA#60356_1_copies:polyA_is_-1 coordinates are BetaCoV/England/02/2020; mRNA#15232_1_copies:polyA_is_-1 co…
SARS2_ORF1a	6	2749	2757	QVVNVVTTK	MESLVPGFNEKTHVQLSLPVLQVRDVLVRGFGDSVEEVLSEARQHLKDGTCGLVEVEKGVLPQLEQPYVFIKRSDARTAPHGHVMVELVAELEGIQYGRSGETLGVLVPHVGEIPVAYRKVLLRKNGNKGAGGHSYGADLKSFDLGDELGTDPYEDFQENWNTKHSSGVTRELMRELNGGAYTRYVDNNFCGPDGYPLECIKDLLARAGKASCTLSEQLDFIDTKRGVYCCREHEHEIAWYTERSEKSYELQTPFEIKLAKKFDTFNGECPNFVFPLNSIIKTIQPRVEKKKLDGFMGRIRSVYPVASPNECNQMCLSTLMKCDHCGETSWQTGDFVKATCEFCGTENLTKEGATTCGYLPQNAVVKIYCPACHNSEVGPEHSLAEYHNESGLKTILRK…	mRNA#35742_1_copies:polyA_is_-1 coordinates are BetaCoV/England/02/2020; mRNA#11782_1_copies:polyA_is_-1 coordinates are BetaCoV/England/02/2020; mRNA#24795_1_copies:polyA_is_-1 coordinates are BetaCoV/England/02/2020; mRNA#71765_1_copies:polyA_is_-1 coordinates are BetaCoV/England/02/2020; mRNA#60356_1_copies:polyA_is_-1 coordinates are BetaCoV/England/02/2020; mRNA#15232_1_copies:polyA_is_-1 co…
SARS2_ORF1a	13	2799	2810	HTDFSSEIIGYK	MESLVPGFNEKTHVQLSLPVLQVRDVLVRGFGDSVEEVLSEARQHLKDGTCGLVEVEKGVLPQLEQPYVFIKRSDARTAPHGHVMVELVAELEGIQYGRSGETLGVLVPHVGEIPVAYRKVLLRKNGNKGAGGHSYGADLKSFDLGDELGTDPYEDFQENWNTKHSSGVTRELMRELNGGAYTRYVDNNFCGPDGYPLECIKDLLARAGKASCTLSEQLDFIDTKRGVYCCREHEHEIAWYTERSEKSYELQTPFEIKLAKKFDTFNGECPNFVFPLNSIIKTIQPRVEKKKLDGFMGRIRSVYPVASPNECNQMCLSTLMKCDHCGETSWQTGDFVKATCEFCGTENLTKEGATTCGYLPQNAVVKIYCPACHNSEVGPEHSLAEYHNESGLKTILRK…	mRNA#11782_1_copies:polyA_is_-1 coordinates are BetaCoV/England/02/2020; mRNA#24795_1_copies:polyA_is_-1 coordinates are BetaCoV/England/02/2020; mRNA#71765_1_copies:polyA_is_-1 coordinates are BetaCoV/England/02/2020; mRNA#60356_1_copies:polyA_is_-1 coordinates are BetaCoV/England/02/2020; mRNA#15232_1_copies:polyA_is_-1 coordinates are BetaCoV/England/02/2020; SARS2_ORF1a; mRNA#64494_1_copies:p…
SARS2_ORF1a	3	2811	2818	AIDGGVTR	MESLVPGFNEKTHVQLSLPVLQVRDVLVRGFGDSVEEVLSEARQHLKDGTCGLVEVEKGVLPQLEQPYVFIKRSDARTAPHGHVMVELVAELEGIQYGRSGETLGVLVPHVGEIPVAYRKVLLRKNGNKGAGGHSYGADLKSFDLGDELGTDPYEDFQENWNTKHSSGVTRELMRELNGGAYTRYVDNNFCGPDGYPLECIKDLLARAGKASCTLSEQLDFIDTKRGVYCCREHEHEIAWYTERSEKSYELQTPFEIKLAKKFDTFNGECPNFVFPLNSIIKTIQPRVEKKKLDGFMGRIRSVYPVASPNECNQMCLSTLMKCDHCGETSWQTGDFVKATCEFCGTENLTKEGATTCGYLPQNAVVKIYCPACHNSEVGPEHSLAEYHNESGLKTILRK…	mRNA#11782_1_copies:polyA_is_-1 coordinates are BetaCoV/England/02/2020; mRNA#24795_1_copies:polyA_is_-1 coordinates are BetaCoV/England/02/2020; mRNA#71765_1_copies:polyA_is_-1 coordinates are BetaCoV/England/02/2020; mRNA#60356_1_copies:polyA_is_-1 coordinates are BetaCoV/England/02/2020; mRNA#15232_1_copies:polyA_is_-1 coordinates are BetaCoV/England/02/2020; SARS2_ORF1a; mRNA#64494_1_copies:p…
SARS2_ORF1a	7	2819	2830	DIASTDTCFANK	MESLVPGFNEKTHVQLSLPVLQVRDVLVRGFGDSVEEVLSEARQHLKDGTCGLVEVEKGVLPQLEQPYVFIKRSDARTAPHGHVMVELVAELEGIQYGRSGETLGVLVPHVGEIPVAYRKVLLRKNGNKGAGGHSYGADLKSFDLGDELGTDPYEDFQENWNTKHSSGVTRELMRELNGGAYTRYVDNNFCGPDGYPLECIKDLLARAGKASCTLSEQLDFIDTKRGVYCCREHEHEIAWYTERSEKSYELQTPFEIKLAKKFDTFNGECPNFVFPLNSIIKTIQPRVEKKKLDGFMGRIRSVYPVASPNECNQMCLSTLMKCDHCGETSWQTGDFVKATCEFCGTENLTKEGATTCGYLPQNAVVKIYCPACHNSEVGPEHSLAEYHNESGLKTILRK…	mRNA#11782_1_copies:polyA_is_-1 coordinates are BetaCoV/England/02/2020; mRNA#24795_1_copies:polyA_is_-1 coordinates are BetaCoV/England/02/2020; mRNA#71765_1_copies:polyA_is_-1 coordinates are BetaCoV/England/02/2020; mRNA#60356_1_copies:polyA_is_-1 coordinates are BetaCoV/England/02/2020; mRNA#15232_1_copies:polyA_is_-1 coordinates are BetaCoV/England/02/2020; SARS2_ORF1a; mRNA#64494_1_copies:p…
SARS2_ORF1a	6	2831	2841	HADFDTWFSQR	MESLVPGFNEKTHVQLSLPVLQVRDVLVRGFGDSVEEVLSEARQHLKDGTCGLVEVEKGVLPQLEQPYVFIKRSDARTAPHGHVMVELVAELEGIQYGRSGETLGVLVPHVGEIPVAYRKVLLRKNGNKGAGGHSYGADLKSFDLGDELGTDPYEDFQENWNTKHSSGVTRELMRELNGGAYTRYVDNNFCGPDGYPLECIKDLLARAGKASCTLSEQLDFIDTKRGVYCCREHEHEIAWYTERSEKSYELQTPFEIKLAKKFDTFNGECPNFVFPLNSIIKTIQPRVEKKKLDGFMGRIRSVYPVASPNECNQMCLSTLMKCDHCGETSWQTGDFVKATCEFCGTENLTKEGATTCGYLPQNAVVKIYCPACHNSEVGPEHSLAEYHNESGLKTILRK…	mRNA#11782_1_copies:polyA_is_-1 coordinates are BetaCoV/England/02/2020; mRNA#24795_1_copies:polyA_is_-1 coordinates are BetaCoV/England/02/2020; mRNA#71765_1_copies:polyA_is_-1 coordinates are BetaCoV/England/02/2020; mRNA#60356_1_copies:polyA_is_-1 coordinates are BetaCoV/England/02/2020; mRNA#15232_1_copies:polyA_is_-1 coordinates are BetaCoV/England/02/2020; SARS2_ORF1a; mRNA#64494_1_copies:p…
SARS2_ORF1a	2	2842	2860	GGSYTNDKACPLIAAVITR	MESLVPGFNEKTHVQLSLPVLQVRDVLVRGFGDSVEEVLSEARQHLKDGTCGLVEVEKGVLPQLEQPYVFIKRSDARTAPHGHVMVELVAELEGIQYGRSGETLGVLVPHVGEIPVAYRKVLLRKNGNKGAGGHSYGADLKSFDLGDELGTDPYEDFQENWNTKHSSGVTRELMRELNGGAYTRYVDNNFCGPDGYPLECIKDLLARAGKASCTLSEQLDFIDTKRGVYCCREHEHEIAWYTERSEKSYELQTPFEIKLAKKFDTFNGECPNFVFPLNSIIKTIQPRVEKKKLDGFMGRIRSVYPVASPNECNQMCLSTLMKCDHCGETSWQTGDFVKATCEFCGTENLTKEGATTCGYLPQNAVVKIYCPACHNSEVGPEHSLAEYHNESGLKTILRK…	mRNA#11782_1_copies:polyA_is_-1 coordinates are BetaCoV/England/02/2020; mRNA#24795_1_copies:polyA_is_-1 coordinates are BetaCoV/England/02/2020; mRNA#71765_1_copies:polyA_is_-1 coordinates are BetaCoV/England/02/2020; mRNA#60356_1_copies:polyA_is_-1 coordinates are BetaCoV/England/02/2020; mRNA#15232_1_copies:polyA_is_-1 coordinates are BetaCoV/England/02/2020; SARS2_ORF1a; mRNA#64494_1_copies:p…
SARS2_ORF1a	5	2850	2860	ACPLIAAVITR	MESLVPGFNEKTHVQLSLPVLQVRDVLVRGFGDSVEEVLSEARQHLKDGTCGLVEVEKGVLPQLEQPYVFIKRSDARTAPHGHVMVELVAELEGIQYGRSGETLGVLVPHVGEIPVAYRKVLLRKNGNKGAGGHSYGADLKSFDLGDELGTDPYEDFQENWNTKHSSGVTRELMRELNGGAYTRYVDNNFCGPDGYPLECIKDLLARAGKASCTLSEQLDFIDTKRGVYCCREHEHEIAWYTERSEKSYELQTPFEIKLAKKFDTFNGECPNFVFPLNSIIKTIQPRVEKKKLDGFMGRIRSVYPVASPNECNQMCLSTLMKCDHCGETSWQTGDFVKATCEFCGTENLTKEGATTCGYLPQNAVVKIYCPACHNSEVGPEHSLAEYHNESGLKTILRK…	mRNA#11782_1_copies:polyA_is_-1 coordinates are BetaCoV/England/02/2020; mRNA#24795_1_copies:polyA_is_-1 coordinates are BetaCoV/England/02/2020; mRNA#71765_1_copies:polyA_is_-1 coordinates are BetaCoV/England/02/2020; mRNA#60356_1_copies:polyA_is_-1 coordinates are BetaCoV/England/02/2020; mRNA#15232_1_copies:polyA_is_-1 coordinates are BetaCoV/England/02/2020; SARS2_ORF1a; mRNA#64494_1_copies:p…
SARS2_ORF1a	17	2861	2875	EVGFVVPGLPGTILR	MESLVPGFNEKTHVQLSLPVLQVRDVLVRGFGDSVEEVLSEARQHLKDGTCGLVEVEKGVLPQLEQPYVFIKRSDARTAPHGHVMVELVAELEGIQYGRSGETLGVLVPHVGEIPVAYRKVLLRKNGNKGAGGHSYGADLKSFDLGDELGTDPYEDFQENWNTKHSSGVTRELMRELNGGAYTRYVDNNFCGPDGYPLECIKDLLARAGKASCTLSEQLDFIDTKRGVYCCREHEHEIAWYTERSEKSYELQTPFEIKLAKKFDTFNGECPNFVFPLNSIIKTIQPRVEKKKLDGFMGRIRSVYPVASPNECNQMCLSTLMKCDHCGETSWQTGDFVKATCEFCGTENLTKEGATTCGYLPQNAVVKIYCPACHNSEVGPEHSLAEYHNESGLKTILRK…	mRNA#11782_1_copies:polyA_is_-1 coordinates are BetaCoV/England/02/2020; mRNA#24795_1_copies:polyA_is_-1 coordinates are BetaCoV/England/02/2020; mRNA#71765_1_copies:polyA_is_-1 coordinates are BetaCoV/England/02/2020; mRNA#60356_1_copies:polyA_is_-1 coordinates are BetaCoV/England/02/2020; mRNA#15232_1_copies:polyA_is_-1 coordinates are BetaCoV/England/02/2020; SARS2_ORF1a; mRNA#64494_1_copies:p…
SARS2_ORF1a	13	2876	2887	TTNGDFLHFLPR	MESLVPGFNEKTHVQLSLPVLQVRDVLVRGFGDSVEEVLSEARQHLKDGTCGLVEVEKGVLPQLEQPYVFIKRSDARTAPHGHVMVELVAELEGIQYGRSGETLGVLVPHVGEIPVAYRKVLLRKNGNKGAGGHSYGADLKSFDLGDELGTDPYEDFQENWNTKHSSGVTRELMRELNGGAYTRYVDNNFCGPDGYPLECIKDLLARAGKASCTLSEQLDFIDTKRGVYCCREHEHEIAWYTERSEKSYELQTPFEIKLAKKFDTFNGECPNFVFPLNSIIKTIQPRVEKKKLDGFMGRIRSVYPVASPNECNQMCLSTLMKCDHCGETSWQTGDFVKATCEFCGTENLTKEGATTCGYLPQNAVVKIYCPACHNSEVGPEHSLAEYHNESGLKTILRK…	mRNA#11782_1_copies:polyA_is_-1 coordinates are BetaCoV/England/02/2020; mRNA#24795_1_copies:polyA_is_-1 coordinates are BetaCoV/England/02/2020; mRNA#71765_1_copies:polyA_is_-1 coordinates are BetaCoV/England/02/2020; mRNA#60356_1_copies:polyA_is_-1 coordinates are BetaCoV/England/02/2020; mRNA#15232_1_copies:polyA_is_-1 coordinates are BetaCoV/England/02/2020; SARS2_ORF1a; mRNA#64494_1_copies:p…
SARS2_ORF1a	5	2888	2901	VFSAVGNICYTPSK	MESLVPGFNEKTHVQLSLPVLQVRDVLVRGFGDSVEEVLSEARQHLKDGTCGLVEVEKGVLPQLEQPYVFIKRSDARTAPHGHVMVELVAELEGIQYGRSGETLGVLVPHVGEIPVAYRKVLLRKNGNKGAGGHSYGADLKSFDLGDELGTDPYEDFQENWNTKHSSGVTRELMRELNGGAYTRYVDNNFCGPDGYPLECIKDLLARAGKASCTLSEQLDFIDTKRGVYCCREHEHEIAWYTERSEKSYELQTPFEIKLAKKFDTFNGECPNFVFPLNSIIKTIQPRVEKKKLDGFMGRIRSVYPVASPNECNQMCLSTLMKCDHCGETSWQTGDFVKATCEFCGTENLTKEGATTCGYLPQNAVVKIYCPACHNSEVGPEHSLAEYHNESGLKTILRK…	mRNA#11782_1_copies:polyA_is_-1 coordinates are BetaCoV/England/02/2020; mRNA#60356_1_copies:polyA_is_-1 coordinates are BetaCoV/England/02/2020; mRNA#15232_1_copies:polyA_is_-1 coordinates are BetaCoV/England/02/2020; SARS2_ORF1a; mRNA#64494_1_copies:polyA_is_-1 coordinates are BetaCoV/England/02/2020; mRNA#50751_1_copies:polyA_is_-1 coordinates are BetaCoV/England/02/2020; mRNA#63152_1_copies:p…
SARS2_ORF1a	2	2924	2953	DASGKPVPYCYDTNVLEGSVAYESLRPDTR	MESLVPGFNEKTHVQLSLPVLQVRDVLVRGFGDSVEEVLSEARQHLKDGTCGLVEVEKGVLPQLEQPYVFIKRSDARTAPHGHVMVELVAELEGIQYGRSGETLGVLVPHVGEIPVAYRKVLLRKNGNKGAGGHSYGADLKSFDLGDELGTDPYEDFQENWNTKHSSGVTRELMRELNGGAYTRYVDNNFCGPDGYPLECIKDLLARAGKASCTLSEQLDFIDTKRGVYCCREHEHEIAWYTERSEKSYELQTPFEIKLAKKFDTFNGECPNFVFPLNSIIKTIQPRVEKKKLDGFMGRIRSVYPVASPNECNQMCLSTLMKCDHCGETSWQTGDFVKATCEFCGTENLTKEGATTCGYLPQNAVVKIYCPACHNSEVGPEHSLAEYHNESGLKTILRK…	mRNA#60356_1_copies:polyA_is_-1 coordinates are BetaCoV/England/02/2020; mRNA#15232_1_copies:polyA_is_-1 coordinates are BetaCoV/England/02/2020; SARS2_ORF1a; mRNA#50751_1_copies:polyA_is_-1 coordinates are BetaCoV/England/02/2020; mRNA#63152_1_copies:polyA_is_-1 coordinates are BetaCoV/England/02/2020; mRNA#28043_1_copies:polyA_is_-1 coordinates are BetaCoV/England/02/2020; mRNA#61732_1_copies:p…
SARS2_ORF1a	10	2954	2974	YVLMDGSIIQFPNTYLEGSVR	MESLVPGFNEKTHVQLSLPVLQVRDVLVRGFGDSVEEVLSEARQHLKDGTCGLVEVEKGVLPQLEQPYVFIKRSDARTAPHGHVMVELVAELEGIQYGRSGETLGVLVPHVGEIPVAYRKVLLRKNGNKGAGGHSYGADLKSFDLGDELGTDPYEDFQENWNTKHSSGVTRELMRELNGGAYTRYVDNNFCGPDGYPLECIKDLLARAGKASCTLSEQLDFIDTKRGVYCCREHEHEIAWYTERSEKSYELQTPFEIKLAKKFDTFNGECPNFVFPLNSIIKTIQPRVEKKKLDGFMGRIRSVYPVASPNECNQMCLSTLMKCDHCGETSWQTGDFVKATCEFCGTENLTKEGATTCGYLPQNAVVKIYCPACHNSEVGPEHSLAEYHNESGLKTILRK…	mRNA#60356_1_copies:polyA_is_-1 coordinates are BetaCoV/England/02/2020; mRNA#15232_1_copies:polyA_is_-1 coordinates are BetaCoV/England/02/2020; SARS2_ORF1a; mRNA#50751_1_copies:polyA_is_-1 coordinates are BetaCoV/England/02/2020; mRNA#63152_1_copies:polyA_is_-1 coordinates are BetaCoV/England/02/2020; mRNA#28043_1_copies:polyA_is_-1 coordinates are BetaCoV/England/02/2020; mRNA#61732_1_copies:p…
SARS2_ORF1a	5	2975	2985	VVTTFDSEYCR	MESLVPGFNEKTHVQLSLPVLQVRDVLVRGFGDSVEEVLSEARQHLKDGTCGLVEVEKGVLPQLEQPYVFIKRSDARTAPHGHVMVELVAELEGIQYGRSGETLGVLVPHVGEIPVAYRKVLLRKNGNKGAGGHSYGADLKSFDLGDELGTDPYEDFQENWNTKHSSGVTRELMRELNGGAYTRYVDNNFCGPDGYPLECIKDLLARAGKASCTLSEQLDFIDTKRGVYCCREHEHEIAWYTERSEKSYELQTPFEIKLAKKFDTFNGECPNFVFPLNSIIKTIQPRVEKKKLDGFMGRIRSVYPVASPNECNQMCLSTLMKCDHCGETSWQTGDFVKATCEFCGTENLTKEGATTCGYLPQNAVVKIYCPACHNSEVGPEHSLAEYHNESGLKTILRK…	mRNA#60356_1_copies:polyA_is_-1 coordinates are BetaCoV/England/02/2020; mRNA#15232_1_copies:polyA_is_-1 coordinates are BetaCoV/England/02/2020; SARS2_ORF1a; mRNA#50751_1_copies:polyA_is_-1 coordinates are BetaCoV/England/02/2020; mRNA#63152_1_copies:polyA_is_-1 coordinates are BetaCoV/England/02/2020; mRNA#28043_1_copies:polyA_is_-1 coordinates are BetaCoV/England/02/2020; mRNA#53608_1_copies:p…
SARS2_ORF1a	3	2992	3003	SEAGVCVSTSGR	MESLVPGFNEKTHVQLSLPVLQVRDVLVRGFGDSVEEVLSEARQHLKDGTCGLVEVEKGVLPQLEQPYVFIKRSDARTAPHGHVMVELVAELEGIQYGRSGETLGVLVPHVGEIPVAYRKVLLRKNGNKGAGGHSYGADLKSFDLGDELGTDPYEDFQENWNTKHSSGVTRELMRELNGGAYTRYVDNNFCGPDGYPLECIKDLLARAGKASCTLSEQLDFIDTKRGVYCCREHEHEIAWYTERSEKSYELQTPFEIKLAKKFDTFNGECPNFVFPLNSIIKTIQPRVEKKKLDGFMGRIRSVYPVASPNECNQMCLSTLMKCDHCGETSWQTGDFVKATCEFCGTENLTKEGATTCGYLPQNAVVKIYCPACHNSEVGPEHSLAEYHNESGLKTILRK…	mRNA#60356_1_copies:polyA_is_-1 coordinates are BetaCoV/England/02/2020; mRNA#15232_1_copies:polyA_is_-1 coordinates are BetaCoV/England/02/2020; SARS2_ORF1a; mRNA#50751_1_copies:polyA_is_-1 coordinates are BetaCoV/England/02/2020; mRNA#63152_1_copies:polyA_is_-1 coordinates are BetaCoV/England/02/2020; mRNA#28043_1_copies:polyA_is_-1 coordinates are BetaCoV/England/02/2020; mRNA#53608_1_copies:p…
SARS2_ORF1a	2	3004	3012	WVLNNDYYR	MESLVPGFNEKTHVQLSLPVLQVRDVLVRGFGDSVEEVLSEARQHLKDGTCGLVEVEKGVLPQLEQPYVFIKRSDARTAPHGHVMVELVAELEGIQYGRSGETLGVLVPHVGEIPVAYRKVLLRKNGNKGAGGHSYGADLKSFDLGDELGTDPYEDFQENWNTKHSSGVTRELMRELNGGAYTRYVDNNFCGPDGYPLECIKDLLARAGKASCTLSEQLDFIDTKRGVYCCREHEHEIAWYTERSEKSYELQTPFEIKLAKKFDTFNGECPNFVFPLNSIIKTIQPRVEKKKLDGFMGRIRSVYPVASPNECNQMCLSTLMKCDHCGETSWQTGDFVKATCEFCGTENLTKEGATTCGYLPQNAVVKIYCPACHNSEVGPEHSLAEYHNESGLKTILRK…	mRNA#60356_1_copies:polyA_is_-1 coordinates are BetaCoV/England/02/2020; mRNA#15232_1_copies:polyA_is_-1 coordinates are BetaCoV/England/02/2020; SARS2_ORF1a; mRNA#50751_1_copies:polyA_is_-1 coordinates are BetaCoV/England/02/2020; mRNA#63152_1_copies:polyA_is_-1 coordinates are BetaCoV/England/02/2020; mRNA#28043_1_copies:polyA_is_-1 coordinates are BetaCoV/England/02/2020; mRNA#53608_1_copies:p…
SARS2_ORF1a	5	3195	3206	SDVLLPLTQYNR	MESLVPGFNEKTHVQLSLPVLQVRDVLVRGFGDSVEEVLSEARQHLKDGTCGLVEVEKGVLPQLEQPYVFIKRSDARTAPHGHVMVELVAELEGIQYGRSGETLGVLVPHVGEIPVAYRKVLLRKNGNKGAGGHSYGADLKSFDLGDELGTDPYEDFQENWNTKHSSGVTRELMRELNGGAYTRYVDNNFCGPDGYPLECIKDLLARAGKASCTLSEQLDFIDTKRGVYCCREHEHEIAWYTERSEKSYELQTPFEIKLAKKFDTFNGECPNFVFPLNSIIKTIQPRVEKKKLDGFMGRIRSVYPVASPNECNQMCLSTLMKCDHCGETSWQTGDFVKATCEFCGTENLTKEGATTCGYLPQNAVVKIYCPACHNSEVGPEHSLAEYHNESGLKTILRK…	mRNA#60356_1_copies:polyA_is_-1 coordinates are BetaCoV/England/02/2020; SARS2_ORF1a; mRNA#50751_1_copies:polyA_is_-1 coordinates are BetaCoV/England/02/2020; mRNA#63152_1_copies:polyA_is_-1 coordinates are BetaCoV/England/02/2020; mRNA#28043_1_copies:polyA_is_-1 coordinates are BetaCoV/England/02/2020; mRNA#53608_1_copies:polyA_is_-1 coordinates are BetaCoV/England/02/2020; mRNA#38535_1_copies:p…
SARS2_ORF1a	4	3207	3213	YLALYNK	MESLVPGFNEKTHVQLSLPVLQVRDVLVRGFGDSVEEVLSEARQHLKDGTCGLVEVEKGVLPQLEQPYVFIKRSDARTAPHGHVMVELVAELEGIQYGRSGETLGVLVPHVGEIPVAYRKVLLRKNGNKGAGGHSYGADLKSFDLGDELGTDPYEDFQENWNTKHSSGVTRELMRELNGGAYTRYVDNNFCGPDGYPLECIKDLLARAGKASCTLSEQLDFIDTKRGVYCCREHEHEIAWYTERSEKSYELQTPFEIKLAKKFDTFNGECPNFVFPLNSIIKTIQPRVEKKKLDGFMGRIRSVYPVASPNECNQMCLSTLMKCDHCGETSWQTGDFVKATCEFCGTENLTKEGATTCGYLPQNAVVKIYCPACHNSEVGPEHSLAEYHNESGLKTILRK…	mRNA#60356_1_copies:polyA_is_-1 coordinates are BetaCoV/England/02/2020; SARS2_ORF1a; mRNA#50751_1_copies:polyA_is_-1 coordinates are BetaCoV/England/02/2020; mRNA#63152_1_copies:polyA_is_-1 coordinates are BetaCoV/England/02/2020; mRNA#28043_1_copies:polyA_is_-1 coordinates are BetaCoV/England/02/2020; mRNA#53608_1_copies:polyA_is_-1 coordinates are BetaCoV/England/02/2020; mRNA#38535_1_copies:p…
SARS2_ORF1a	1	3214	3227	YKYFSGAMDTTSYR	MESLVPGFNEKTHVQLSLPVLQVRDVLVRGFGDSVEEVLSEARQHLKDGTCGLVEVEKGVLPQLEQPYVFIKRSDARTAPHGHVMVELVAELEGIQYGRSGETLGVLVPHVGEIPVAYRKVLLRKNGNKGAGGHSYGADLKSFDLGDELGTDPYEDFQENWNTKHSSGVTRELMRELNGGAYTRYVDNNFCGPDGYPLECIKDLLARAGKASCTLSEQLDFIDTKRGVYCCREHEHEIAWYTERSEKSYELQTPFEIKLAKKFDTFNGECPNFVFPLNSIIKTIQPRVEKKKLDGFMGRIRSVYPVASPNECNQMCLSTLMKCDHCGETSWQTGDFVKATCEFCGTENLTKEGATTCGYLPQNAVVKIYCPACHNSEVGPEHSLAEYHNESGLKTILRK…	mRNA#60356_1_copies:polyA_is_-1 coordinates are BetaCoV/England/02/2020; SARS2_ORF1a; mRNA#50751_1_copies:polyA_is_-1 coordinates are BetaCoV/England/02/2020; mRNA#63152_1_copies:polyA_is_-1 coordinates are BetaCoV/England/02/2020; mRNA#28043_1_copies:polyA_is_-1 coordinates are BetaCoV/England/02/2020; mRNA#53608_1_copies:polyA_is_-1 coordinates are BetaCoV/England/02/2020; mRNA#38535_1_copies:p…
SARS2_ORF1a	10	3216	3227	YFSGAMDTTSYR	MESLVPGFNEKTHVQLSLPVLQVRDVLVRGFGDSVEEVLSEARQHLKDGTCGLVEVEKGVLPQLEQPYVFIKRSDARTAPHGHVMVELVAELEGIQYGRSGETLGVLVPHVGEIPVAYRKVLLRKNGNKGAGGHSYGADLKSFDLGDELGTDPYEDFQENWNTKHSSGVTRELMRELNGGAYTRYVDNNFCGPDGYPLECIKDLLARAGKASCTLSEQLDFIDTKRGVYCCREHEHEIAWYTERSEKSYELQTPFEIKLAKKFDTFNGECPNFVFPLNSIIKTIQPRVEKKKLDGFMGRIRSVYPVASPNECNQMCLSTLMKCDHCGETSWQTGDFVKATCEFCGTENLTKEGATTCGYLPQNAVVKIYCPACHNSEVGPEHSLAEYHNESGLKTILRK…	mRNA#60356_1_copies:polyA_is_-1 coordinates are BetaCoV/England/02/2020; SARS2_ORF1a; mRNA#50751_1_copies:polyA_is_-1 coordinates are BetaCoV/England/02/2020; mRNA#63152_1_copies:polyA_is_-1 coordinates are BetaCoV/England/02/2020; mRNA#28043_1_copies:polyA_is_-1 coordinates are BetaCoV/England/02/2020; mRNA#53608_1_copies:polyA_is_-1 coordinates are BetaCoV/England/02/2020; mRNA#38535_1_copies:p…
SARS2_ORF1a	3	3237	3267	ALNDFSNSGSDVLYQPPQTSITSAVLQSGFR	MESLVPGFNEKTHVQLSLPVLQVRDVLVRGFGDSVEEVLSEARQHLKDGTCGLVEVEKGVLPQLEQPYVFIKRSDARTAPHGHVMVELVAELEGIQYGRSGETLGVLVPHVGEIPVAYRKVLLRKNGNKGAGGHSYGADLKSFDLGDELGTDPYEDFQENWNTKHSSGVTRELMRELNGGAYTRYVDNNFCGPDGYPLECIKDLLARAGKASCTLSEQLDFIDTKRGVYCCREHEHEIAWYTERSEKSYELQTPFEIKLAKKFDTFNGECPNFVFPLNSIIKTIQPRVEKKKLDGFMGRIRSVYPVASPNECNQMCLSTLMKCDHCGETSWQTGDFVKATCEFCGTENLTKEGATTCGYLPQNAVVKIYCPACHNSEVGPEHSLAEYHNESGLKTILRK…	mRNA#60356_1_copies:polyA_is_-1 coordinates are BetaCoV/England/02/2020; SARS2_ORF1a; mRNA#11894_1_copies:polyA_is_-1 coordinates are BetaCoV/England/02/2020; mRNA#50751_1_copies:polyA_is_-1 coordinates are BetaCoV/England/02/2020; mRNA#63152_1_copies:polyA_is_-1 coordinates are BetaCoV/England/02/2020; mRNA#28043_1_copies:polyA_is_-1 coordinates are BetaCoV/England/02/2020; mRNA#53608_1_copies:p…
SARS2_ORF1a	1	3237	3268	ALNDFSNSGSDVLYQPPQTSITSAVLQSGFRK	MESLVPGFNEKTHVQLSLPVLQVRDVLVRGFGDSVEEVLSEARQHLKDGTCGLVEVEKGVLPQLEQPYVFIKRSDARTAPHGHVMVELVAELEGIQYGRSGETLGVLVPHVGEIPVAYRKVLLRKNGNKGAGGHSYGADLKSFDLGDELGTDPYEDFQENWNTKHSSGVTRELMRELNGGAYTRYVDNNFCGPDGYPLECIKDLLARAGKASCTLSEQLDFIDTKRGVYCCREHEHEIAWYTERSEKSYELQTPFEIKLAKKFDTFNGECPNFVFPLNSIIKTIQPRVEKKKLDGFMGRIRSVYPVASPNECNQMCLSTLMKCDHCGETSWQTGDFVKATCEFCGTENLTKEGATTCGYLPQNAVVKIYCPACHNSEVGPEHSLAEYHNESGLKTILRK…	mRNA#60356_1_copies:polyA_is_-1 coordinates are BetaCoV/England/02/2020; SARS2_ORF1a; mRNA#11894_1_copies:polyA_is_-1 coordinates are BetaCoV/England/02/2020; mRNA#50751_1_copies:polyA_is_-1 coordinates are BetaCoV/England/02/2020; mRNA#63152_1_copies:polyA_is_-1 coordinates are BetaCoV/England/02/2020; mRNA#28043_1_copies:polyA_is_-1 coordinates are BetaCoV/England/02/2020; mRNA#53608_1_copies:p…
SARS2_ORF1a	8	3304	3323	HVICTSEDMLNPNYEDLLIR	MESLVPGFNEKTHVQLSLPVLQVRDVLVRGFGDSVEEVLSEARQHLKDGTCGLVEVEKGVLPQLEQPYVFIKRSDARTAPHGHVMVELVAELEGIQYGRSGETLGVLVPHVGEIPVAYRKVLLRKNGNKGAGGHSYGADLKSFDLGDELGTDPYEDFQENWNTKHSSGVTRELMRELNGGAYTRYVDNNFCGPDGYPLECIKDLLARAGKASCTLSEQLDFIDTKRGVYCCREHEHEIAWYTERSEKSYELQTPFEIKLAKKFDTFNGECPNFVFPLNSIIKTIQPRVEKKKLDGFMGRIRSVYPVASPNECNQMCLSTLMKCDHCGETSWQTGDFVKATCEFCGTENLTKEGATTCGYLPQNAVVKIYCPACHNSEVGPEHSLAEYHNESGLKTILRK…	mRNA#60356_1_copies:polyA_is_-1 coordinates are BetaCoV/England/02/2020; SARS2_ORF1a; mRNA#11894_1_copies:polyA_is_-1 coordinates are BetaCoV/England/02/2020; mRNA#50751_1_copies:polyA_is_-1 coordinates are BetaCoV/England/02/2020; mRNA#63152_1_copies:polyA_is_-1 coordinates are BetaCoV/England/02/2020; mRNA#28043_1_copies:polyA_is_-1 coordinates are BetaCoV/England/02/2020; SARS2_pp1ab_nsp5; mRN…
SARS2_ORF1a	2	3304	3324	HVICTSEDMLNPNYEDLLIRK	MESLVPGFNEKTHVQLSLPVLQVRDVLVRGFGDSVEEVLSEARQHLKDGTCGLVEVEKGVLPQLEQPYVFIKRSDARTAPHGHVMVELVAELEGIQYGRSGETLGVLVPHVGEIPVAYRKVLLRKNGNKGAGGHSYGADLKSFDLGDELGTDPYEDFQENWNTKHSSGVTRELMRELNGGAYTRYVDNNFCGPDGYPLECIKDLLARAGKASCTLSEQLDFIDTKRGVYCCREHEHEIAWYTERSEKSYELQTPFEIKLAKKFDTFNGECPNFVFPLNSIIKTIQPRVEKKKLDGFMGRIRSVYPVASPNECNQMCLSTLMKCDHCGETSWQTGDFVKATCEFCGTENLTKEGATTCGYLPQNAVVKIYCPACHNSEVGPEHSLAEYHNESGLKTILRK…	mRNA#60356_1_copies:polyA_is_-1 coordinates are BetaCoV/England/02/2020; SARS2_ORF1a; mRNA#11894_1_copies:polyA_is_-1 coordinates are BetaCoV/England/02/2020; mRNA#50751_1_copies:polyA_is_-1 coordinates are BetaCoV/England/02/2020; mRNA#63152_1_copies:polyA_is_-1 coordinates are BetaCoV/England/02/2020; mRNA#28043_1_copies:polyA_is_-1 coordinates are BetaCoV/England/02/2020; SARS2_pp1ab_nsp5; mRN…
SARS2_ORF1a	2	3324	3339	KSNHNFLVQAGNVQLR	MESLVPGFNEKTHVQLSLPVLQVRDVLVRGFGDSVEEVLSEARQHLKDGTCGLVEVEKGVLPQLEQPYVFIKRSDARTAPHGHVMVELVAELEGIQYGRSGETLGVLVPHVGEIPVAYRKVLLRKNGNKGAGGHSYGADLKSFDLGDELGTDPYEDFQENWNTKHSSGVTRELMRELNGGAYTRYVDNNFCGPDGYPLECIKDLLARAGKASCTLSEQLDFIDTKRGVYCCREHEHEIAWYTERSEKSYELQTPFEIKLAKKFDTFNGECPNFVFPLNSIIKTIQPRVEKKKLDGFMGRIRSVYPVASPNECNQMCLSTLMKCDHCGETSWQTGDFVKATCEFCGTENLTKEGATTCGYLPQNAVVKIYCPACHNSEVGPEHSLAEYHNESGLKTILRK…	mRNA#60356_1_copies:polyA_is_-1 coordinates are BetaCoV/England/02/2020; SARS2_ORF1a; mRNA#11894_1_copies:polyA_is_-1 coordinates are BetaCoV/England/02/2020; mRNA#50751_1_copies:polyA_is_-1 coordinates are BetaCoV/England/02/2020; mRNA#63152_1_copies:polyA_is_-1 coordinates are BetaCoV/England/02/2020; mRNA#28043_1_copies:polyA_is_-1 coordinates are BetaCoV/England/02/2020; SARS2_pp1ab_nsp5; mRN…
SARS2_ORF1a	13	3325	3339	SNHNFLVQAGNVQLR	MESLVPGFNEKTHVQLSLPVLQVRDVLVRGFGDSVEEVLSEARQHLKDGTCGLVEVEKGVLPQLEQPYVFIKRSDARTAPHGHVMVELVAELEGIQYGRSGETLGVLVPHVGEIPVAYRKVLLRKNGNKGAGGHSYGADLKSFDLGDELGTDPYEDFQENWNTKHSSGVTRELMRELNGGAYTRYVDNNFCGPDGYPLECIKDLLARAGKASCTLSEQLDFIDTKRGVYCCREHEHEIAWYTERSEKSYELQTPFEIKLAKKFDTFNGECPNFVFPLNSIIKTIQPRVEKKKLDGFMGRIRSVYPVASPNECNQMCLSTLMKCDHCGETSWQTGDFVKATCEFCGTENLTKEGATTCGYLPQNAVVKIYCPACHNSEVGPEHSLAEYHNESGLKTILRK…	mRNA#60356_1_copies:polyA_is_-1 coordinates are BetaCoV/England/02/2020; SARS2_ORF1a; mRNA#11894_1_copies:polyA_is_-1 coordinates are BetaCoV/England/02/2020; mRNA#50751_1_copies:polyA_is_-1 coordinates are BetaCoV/England/02/2020; mRNA#63152_1_copies:polyA_is_-1 coordinates are BetaCoV/England/02/2020; mRNA#28043_1_copies:polyA_is_-1 coordinates are BetaCoV/England/02/2020; SARS2_pp1ab_nsp5; mRN…
SARS2_ORF1a	18	3340	3351	VIGHSMQNCVLK	MESLVPGFNEKTHVQLSLPVLQVRDVLVRGFGDSVEEVLSEARQHLKDGTCGLVEVEKGVLPQLEQPYVFIKRSDARTAPHGHVMVELVAELEGIQYGRSGETLGVLVPHVGEIPVAYRKVLLRKNGNKGAGGHSYGADLKSFDLGDELGTDPYEDFQENWNTKHSSGVTRELMRELNGGAYTRYVDNNFCGPDGYPLECIKDLLARAGKASCTLSEQLDFIDTKRGVYCCREHEHEIAWYTERSEKSYELQTPFEIKLAKKFDTFNGECPNFVFPLNSIIKTIQPRVEKKKLDGFMGRIRSVYPVASPNECNQMCLSTLMKCDHCGETSWQTGDFVKATCEFCGTENLTKEGATTCGYLPQNAVVKIYCPACHNSEVGPEHSLAEYHNESGLKTILRK…	mRNA#60356_1_copies:polyA_is_-1 coordinates are BetaCoV/England/02/2020; SARS2_ORF1a; mRNA#11894_1_copies:polyA_is_-1 coordinates are BetaCoV/England/02/2020; mRNA#50751_1_copies:polyA_is_-1 coordinates are BetaCoV/England/02/2020; mRNA#63152_1_copies:polyA_is_-1 coordinates are BetaCoV/England/02/2020; mRNA#28043_1_copies:polyA_is_-1 coordinates are BetaCoV/England/02/2020; SARS2_pp1ab_nsp5; mRN…
SARS2_ORF1a	1	3352	3360	LKVDTANPK	MESLVPGFNEKTHVQLSLPVLQVRDVLVRGFGDSVEEVLSEARQHLKDGTCGLVEVEKGVLPQLEQPYVFIKRSDARTAPHGHVMVELVAELEGIQYGRSGETLGVLVPHVGEIPVAYRKVLLRKNGNKGAGGHSYGADLKSFDLGDELGTDPYEDFQENWNTKHSSGVTRELMRELNGGAYTRYVDNNFCGPDGYPLECIKDLLARAGKASCTLSEQLDFIDTKRGVYCCREHEHEIAWYTERSEKSYELQTPFEIKLAKKFDTFNGECPNFVFPLNSIIKTIQPRVEKKKLDGFMGRIRSVYPVASPNECNQMCLSTLMKCDHCGETSWQTGDFVKATCEFCGTENLTKEGATTCGYLPQNAVVKIYCPACHNSEVGPEHSLAEYHNESGLKTILRK…	mRNA#60356_1_copies:polyA_is_-1 coordinates are BetaCoV/England/02/2020; SARS2_ORF1a; mRNA#11894_1_copies:polyA_is_-1 coordinates are BetaCoV/England/02/2020; mRNA#50751_1_copies:polyA_is_-1 coordinates are BetaCoV/England/02/2020; mRNA#63152_1_copies:polyA_is_-1 coordinates are BetaCoV/England/02/2020; mRNA#28043_1_copies:polyA_is_-1 coordinates are BetaCoV/England/02/2020; mRNA#29057_1_copies:p…
SARS2_ORF1a	12	3486	3499	FTTTLNDFNLVAMK	MESLVPGFNEKTHVQLSLPVLQVRDVLVRGFGDSVEEVLSEARQHLKDGTCGLVEVEKGVLPQLEQPYVFIKRSDARTAPHGHVMVELVAELEGIQYGRSGETLGVLVPHVGEIPVAYRKVLLRKNGNKGAGGHSYGADLKSFDLGDELGTDPYEDFQENWNTKHSSGVTRELMRELNGGAYTRYVDNNFCGPDGYPLECIKDLLARAGKASCTLSEQLDFIDTKRGVYCCREHEHEIAWYTERSEKSYELQTPFEIKLAKKFDTFNGECPNFVFPLNSIIKTIQPRVEKKKLDGFMGRIRSVYPVASPNECNQMCLSTLMKCDHCGETSWQTGDFVKATCEFCGTENLTKEGATTCGYLPQNAVVKIYCPACHNSEVGPEHSLAEYHNESGLKTILRK…	SARS2_ORF1a; mRNA#11894_1_copies:polyA_is_-1 coordinates are BetaCoV/England/02/2020; mRNA#50751_1_copies:polyA_is_-1 coordinates are BetaCoV/England/02/2020; mRNA#63152_1_copies:polyA_is_-1 coordinates are BetaCoV/England/02/2020; mRNA#28043_1_copies:polyA_is_-1 coordinates are BetaCoV/England/02/2020; mRNA#29057_1_copies:polyA_is_-1 coordinates are BetaCoV/England/02/2020; mRNA#74815_1_copies:p…
SARS2_ORF1a	6	3533	3542	ELLQNGMNGR	MESLVPGFNEKTHVQLSLPVLQVRDVLVRGFGDSVEEVLSEARQHLKDGTCGLVEVEKGVLPQLEQPYVFIKRSDARTAPHGHVMVELVAELEGIQYGRSGETLGVLVPHVGEIPVAYRKVLLRKNGNKGAGGHSYGADLKSFDLGDELGTDPYEDFQENWNTKHSSGVTRELMRELNGGAYTRYVDNNFCGPDGYPLECIKDLLARAGKASCTLSEQLDFIDTKRGVYCCREHEHEIAWYTERSEKSYELQTPFEIKLAKKFDTFNGECPNFVFPLNSIIKTIQPRVEKKKLDGFMGRIRSVYPVASPNECNQMCLSTLMKCDHCGETSWQTGDFVKATCEFCGTENLTKEGATTCGYLPQNAVVKIYCPACHNSEVGPEHSLAEYHNESGLKTILRK…	mRNA#30961_1_copies:polyA_is_-1 coordinates are BetaCoV/England/02/2020; SARS2_ORF1a; mRNA#11894_1_copies:polyA_is_-1 coordinates are BetaCoV/England/02/2020; mRNA#50751_1_copies:polyA_is_-1 coordinates are BetaCoV/England/02/2020; mRNA#63152_1_copies:polyA_is_-1 coordinates are BetaCoV/England/02/2020; mRNA#28043_1_copies:polyA_is_-1 coordinates are BetaCoV/England/02/2020; mRNA#29057_1_copies:p…
SARS2_ORF1a	14	3543	3561	TILGSALLEDEFTPFDVVR	MESLVPGFNEKTHVQLSLPVLQVRDVLVRGFGDSVEEVLSEARQHLKDGTCGLVEVEKGVLPQLEQPYVFIKRSDARTAPHGHVMVELVAELEGIQYGRSGETLGVLVPHVGEIPVAYRKVLLRKNGNKGAGGHSYGADLKSFDLGDELGTDPYEDFQENWNTKHSSGVTRELMRELNGGAYTRYVDNNFCGPDGYPLECIKDLLARAGKASCTLSEQLDFIDTKRGVYCCREHEHEIAWYTERSEKSYELQTPFEIKLAKKFDTFNGECPNFVFPLNSIIKTIQPRVEKKKLDGFMGRIRSVYPVASPNECNQMCLSTLMKCDHCGETSWQTGDFVKATCEFCGTENLTKEGATTCGYLPQNAVVKIYCPACHNSEVGPEHSLAEYHNESGLKTILRK…	mRNA#30961_1_copies:polyA_is_-1 coordinates are BetaCoV/England/02/2020; SARS2_ORF1a; mRNA#11894_1_copies:polyA_is_-1 coordinates are BetaCoV/England/02/2020; mRNA#50751_1_copies:polyA_is_-1 coordinates are BetaCoV/England/02/2020; mRNA#63152_1_copies:polyA_is_-1 coordinates are BetaCoV/England/02/2020; mRNA#28043_1_copies:polyA_is_-1 coordinates are BetaCoV/England/02/2020; mRNA#74815_1_copies:p…
SARS2_ORF1a	1	3562	3573	QCSGVTFQSAVK	MESLVPGFNEKTHVQLSLPVLQVRDVLVRGFGDSVEEVLSEARQHLKDGTCGLVEVEKGVLPQLEQPYVFIKRSDARTAPHGHVMVELVAELEGIQYGRSGETLGVLVPHVGEIPVAYRKVLLRKNGNKGAGGHSYGADLKSFDLGDELGTDPYEDFQENWNTKHSSGVTRELMRELNGGAYTRYVDNNFCGPDGYPLECIKDLLARAGKASCTLSEQLDFIDTKRGVYCCREHEHEIAWYTERSEKSYELQTPFEIKLAKKFDTFNGECPNFVFPLNSIIKTIQPRVEKKKLDGFMGRIRSVYPVASPNECNQMCLSTLMKCDHCGETSWQTGDFVKATCEFCGTENLTKEGATTCGYLPQNAVVKIYCPACHNSEVGPEHSLAEYHNESGLKTILRK…	mRNA#30961_1_copies:polyA_is_-1 coordinates are BetaCoV/England/02/2020; SARS2_ORF1a; mRNA#11894_1_copies:polyA_is_-1 coordinates are BetaCoV/England/02/2020; mRNA#50751_1_copies:polyA_is_-1 coordinates are BetaCoV/England/02/2020; mRNA#63152_1_copies:polyA_is_-1 coordinates are BetaCoV/England/02/2020; mRNA#28043_1_copies:polyA_is_-1 coordinates are BetaCoV/England/02/2020; mRNA#74815_1_copies:p…
SARS2_ORF1a	8	3663	3678	IMTWLDMVDTSLSGFK	MESLVPGFNEKTHVQLSLPVLQVRDVLVRGFGDSVEEVLSEARQHLKDGTCGLVEVEKGVLPQLEQPYVFIKRSDARTAPHGHVMVELVAELEGIQYGRSGETLGVLVPHVGEIPVAYRKVLLRKNGNKGAGGHSYGADLKSFDLGDELGTDPYEDFQENWNTKHSSGVTRELMRELNGGAYTRYVDNNFCGPDGYPLECIKDLLARAGKASCTLSEQLDFIDTKRGVYCCREHEHEIAWYTERSEKSYELQTPFEIKLAKKFDTFNGECPNFVFPLNSIIKTIQPRVEKKKLDGFMGRIRSVYPVASPNECNQMCLSTLMKCDHCGETSWQTGDFVKATCEFCGTENLTKEGATTCGYLPQNAVVKIYCPACHNSEVGPEHSLAEYHNESGLKTILRK…	mRNA#30961_1_copies:polyA_is_-1 coordinates are BetaCoV/England/02/2020; SARS2_ORF1a; mRNA#50751_1_copies:polyA_is_-1 coordinates are BetaCoV/England/02/2020; mRNA#74815_1_copies:polyA_is_-1 coordinates are BetaCoV/England/02/2020; mRNA#53608_1_copies:polyA_is_-1 coordinates are BetaCoV/England/02/2020; mRNA#38535_1_copies:polyA_is_-1 coordinates are BetaCoV/England/02/2020; mRNA#18825_1_copies:p…
SARS2_ORF1a	14	3822	3832	YMNSQGLLPPK	MESLVPGFNEKTHVQLSLPVLQVRDVLVRGFGDSVEEVLSEARQHLKDGTCGLVEVEKGVLPQLEQPYVFIKRSDARTAPHGHVMVELVAELEGIQYGRSGETLGVLVPHVGEIPVAYRKVLLRKNGNKGAGGHSYGADLKSFDLGDELGTDPYEDFQENWNTKHSSGVTRELMRELNGGAYTRYVDNNFCGPDGYPLECIKDLLARAGKASCTLSEQLDFIDTKRGVYCCREHEHEIAWYTERSEKSYELQTPFEIKLAKKFDTFNGECPNFVFPLNSIIKTIQPRVEKKKLDGFMGRIRSVYPVASPNECNQMCLSTLMKCDHCGETSWQTGDFVKATCEFCGTENLTKEGATTCGYLPQNAVVKIYCPACHNSEVGPEHSLAEYHNESGLKTILRK…	mRNA#30961_1_copies:polyA_is_-1 coordinates are BetaCoV/England/02/2020; SARS2_ORF1a; mRNA#50751_1_copies:polyA_is_-1 coordinates are BetaCoV/England/02/2020; mRNA#74815_1_copies:polyA_is_-1 coordinates are BetaCoV/England/02/2020; mRNA#53608_1_copies:polyA_is_-1 coordinates are BetaCoV/England/02/2020; mRNA#38535_1_copies:polyA_is_-1 coordinates are BetaCoV/England/02/2020; mRNA#15325_1_copies:p…
SARS2_ORF1a	1	3833	3839	NSIDAFK	MESLVPGFNEKTHVQLSLPVLQVRDVLVRGFGDSVEEVLSEARQHLKDGTCGLVEVEKGVLPQLEQPYVFIKRSDARTAPHGHVMVELVAELEGIQYGRSGETLGVLVPHVGEIPVAYRKVLLRKNGNKGAGGHSYGADLKSFDLGDELGTDPYEDFQENWNTKHSSGVTRELMRELNGGAYTRYVDNNFCGPDGYPLECIKDLLARAGKASCTLSEQLDFIDTKRGVYCCREHEHEIAWYTERSEKSYELQTPFEIKLAKKFDTFNGECPNFVFPLNSIIKTIQPRVEKKKLDGFMGRIRSVYPVASPNECNQMCLSTLMKCDHCGETSWQTGDFVKATCEFCGTENLTKEGATTCGYLPQNAVVKIYCPACHNSEVGPEHSLAEYHNESGLKTILRK…	mRNA#30961_1_copies:polyA_is_-1 coordinates are BetaCoV/England/02/2020; SARS2_ORF1a; mRNA#50751_1_copies:polyA_is_-1 coordinates are BetaCoV/England/02/2020; mRNA#74815_1_copies:polyA_is_-1 coordinates are BetaCoV/England/02/2020; mRNA#53608_1_copies:polyA_is_-1 coordinates are BetaCoV/England/02/2020; mRNA#38535_1_copies:polyA_is_-1 coordinates are BetaCoV/England/02/2020; mRNA#15325_1_copies:p…
SARS2_ORF1a	2	3833	3843	NSIDAFKLNIK	MESLVPGFNEKTHVQLSLPVLQVRDVLVRGFGDSVEEVLSEARQHLKDGTCGLVEVEKGVLPQLEQPYVFIKRSDARTAPHGHVMVELVAELEGIQYGRSGETLGVLVPHVGEIPVAYRKVLLRKNGNKGAGGHSYGADLKSFDLGDELGTDPYEDFQENWNTKHSSGVTRELMRELNGGAYTRYVDNNFCGPDGYPLECIKDLLARAGKASCTLSEQLDFIDTKRGVYCCREHEHEIAWYTERSEKSYELQTPFEIKLAKKFDTFNGECPNFVFPLNSIIKTIQPRVEKKKLDGFMGRIRSVYPVASPNECNQMCLSTLMKCDHCGETSWQTGDFVKATCEFCGTENLTKEGATTCGYLPQNAVVKIYCPACHNSEVGPEHSLAEYHNESGLKTILRK…	mRNA#30961_1_copies:polyA_is_-1 coordinates are BetaCoV/England/02/2020; SARS2_ORF1a; mRNA#50751_1_copies:polyA_is_-1 coordinates are BetaCoV/England/02/2020; mRNA#74815_1_copies:polyA_is_-1 coordinates are BetaCoV/England/02/2020; mRNA#53608_1_copies:polyA_is_-1 coordinates are BetaCoV/England/02/2020; mRNA#38535_1_copies:polyA_is_-1 coordinates are BetaCoV/England/02/2020; mRNA#15325_1_copies:p…
SARS2_ORF1a	6	3844	3854	LLGVGGKPCIK	MESLVPGFNEKTHVQLSLPVLQVRDVLVRGFGDSVEEVLSEARQHLKDGTCGLVEVEKGVLPQLEQPYVFIKRSDARTAPHGHVMVELVAELEGIQYGRSGETLGVLVPHVGEIPVAYRKVLLRKNGNKGAGGHSYGADLKSFDLGDELGTDPYEDFQENWNTKHSSGVTRELMRELNGGAYTRYVDNNFCGPDGYPLECIKDLLARAGKASCTLSEQLDFIDTKRGVYCCREHEHEIAWYTERSEKSYELQTPFEIKLAKKFDTFNGECPNFVFPLNSIIKTIQPRVEKKKLDGFMGRIRSVYPVASPNECNQMCLSTLMKCDHCGETSWQTGDFVKATCEFCGTENLTKEGATTCGYLPQNAVVKIYCPACHNSEVGPEHSLAEYHNESGLKTILRK…	mRNA#30961_1_copies:polyA_is_-1 coordinates are BetaCoV/England/02/2020; SARS2_ORF1a; mRNA#50751_1_copies:polyA_is_-1 coordinates are BetaCoV/England/02/2020; mRNA#74815_1_copies:polyA_is_-1 coordinates are BetaCoV/England/02/2020; mRNA#53608_1_copies:polyA_is_-1 coordinates are BetaCoV/England/02/2020; mRNA#38535_1_copies:polyA_is_-1 coordinates are BetaCoV/England/02/2020; mRNA#15325_1_copies:p…
SARS2_ORF1a	6	3867	3880	CTSVVLLSVLQQLR	MESLVPGFNEKTHVQLSLPVLQVRDVLVRGFGDSVEEVLSEARQHLKDGTCGLVEVEKGVLPQLEQPYVFIKRSDARTAPHGHVMVELVAELEGIQYGRSGETLGVLVPHVGEIPVAYRKVLLRKNGNKGAGGHSYGADLKSFDLGDELGTDPYEDFQENWNTKHSSGVTRELMRELNGGAYTRYVDNNFCGPDGYPLECIKDLLARAGKASCTLSEQLDFIDTKRGVYCCREHEHEIAWYTERSEKSYELQTPFEIKLAKKFDTFNGECPNFVFPLNSIIKTIQPRVEKKKLDGFMGRIRSVYPVASPNECNQMCLSTLMKCDHCGETSWQTGDFVKATCEFCGTENLTKEGATTCGYLPQNAVVKIYCPACHNSEVGPEHSLAEYHNESGLKTILRK…	mRNA#30961_1_copies:polyA_is_-1 coordinates are BetaCoV/England/02/2020; SARS2_ORF1a; mRNA#50751_1_copies:polyA_is_-1 coordinates are BetaCoV/England/02/2020; mRNA#74815_1_copies:polyA_is_-1 coordinates are BetaCoV/England/02/2020; mRNA#53608_1_copies:polyA_is_-1 coordinates are BetaCoV/England/02/2020; mRNA#46677_1_copies:polyA_is_-1 coordinates are BetaCoV/England/02/2020; mRNA#38535_1_copies:p…
SARS2_ORF1a	3	3903	3910	DTTEAFEK	MESLVPGFNEKTHVQLSLPVLQVRDVLVRGFGDSVEEVLSEARQHLKDGTCGLVEVEKGVLPQLEQPYVFIKRSDARTAPHGHVMVELVAELEGIQYGRSGETLGVLVPHVGEIPVAYRKVLLRKNGNKGAGGHSYGADLKSFDLGDELGTDPYEDFQENWNTKHSSGVTRELMRELNGGAYTRYVDNNFCGPDGYPLECIKDLLARAGKASCTLSEQLDFIDTKRGVYCCREHEHEIAWYTERSEKSYELQTPFEIKLAKKFDTFNGECPNFVFPLNSIIKTIQPRVEKKKLDGFMGRIRSVYPVASPNECNQMCLSTLMKCDHCGETSWQTGDFVKATCEFCGTENLTKEGATTCGYLPQNAVVKIYCPACHNSEVGPEHSLAEYHNESGLKTILRK…	mRNA#30961_1_copies:polyA_is_-1 coordinates are BetaCoV/England/02/2020; SARS2_ORF1a; mRNA#50751_1_copies:polyA_is_-1 coordinates are BetaCoV/England/02/2020; mRNA#74815_1_copies:polyA_is_-1 coordinates are BetaCoV/England/02/2020; mRNA#53608_1_copies:polyA_is_-1 coordinates are BetaCoV/England/02/2020; mRNA#46677_1_copies:polyA_is_-1 coordinates are BetaCoV/England/02/2020; mRNA#38535_1_copies:p…
SARS2_ORF1a	4	3930	3938	LCEEMLDNR	MESLVPGFNEKTHVQLSLPVLQVRDVLVRGFGDSVEEVLSEARQHLKDGTCGLVEVEKGVLPQLEQPYVFIKRSDARTAPHGHVMVELVAELEGIQYGRSGETLGVLVPHVGEIPVAYRKVLLRKNGNKGAGGHSYGADLKSFDLGDELGTDPYEDFQENWNTKHSSGVTRELMRELNGGAYTRYVDNNFCGPDGYPLECIKDLLARAGKASCTLSEQLDFIDTKRGVYCCREHEHEIAWYTERSEKSYELQTPFEIKLAKKFDTFNGECPNFVFPLNSIIKTIQPRVEKKKLDGFMGRIRSVYPVASPNECNQMCLSTLMKCDHCGETSWQTGDFVKATCEFCGTENLTKEGATTCGYLPQNAVVKIYCPACHNSEVGPEHSLAEYHNESGLKTILRK…	mRNA#30961_1_copies:polyA_is_-1 coordinates are BetaCoV/England/02/2020; SARS2_ORF1a; mRNA#50751_1_copies:polyA_is_-1 coordinates are BetaCoV/England/02/2020; mRNA#74815_1_copies:polyA_is_-1 coordinates are BetaCoV/England/02/2020; mRNA#53608_1_copies:polyA_is_-1 coordinates are BetaCoV/England/02/2020; mRNA#46677_1_copies:polyA_is_-1 coordinates are BetaCoV/England/02/2020; mRNA#38535_1_copies:p…
SARS2_ORF1a	2	3989	3999	SEFDRDAAMQR	MESLVPGFNEKTHVQLSLPVLQVRDVLVRGFGDSVEEVLSEARQHLKDGTCGLVEVEKGVLPQLEQPYVFIKRSDARTAPHGHVMVELVAELEGIQYGRSGETLGVLVPHVGEIPVAYRKVLLRKNGNKGAGGHSYGADLKSFDLGDELGTDPYEDFQENWNTKHSSGVTRELMRELNGGAYTRYVDNNFCGPDGYPLECIKDLLARAGKASCTLSEQLDFIDTKRGVYCCREHEHEIAWYTERSEKSYELQTPFEIKLAKKFDTFNGECPNFVFPLNSIIKTIQPRVEKKKLDGFMGRIRSVYPVASPNECNQMCLSTLMKCDHCGETSWQTGDFVKATCEFCGTENLTKEGATTCGYLPQNAVVKIYCPACHNSEVGPEHSLAEYHNESGLKTILRK…	mRNA#30961_1_copies:polyA_is_-1 coordinates are BetaCoV/England/02/2020; SARS2_ORF1a; mRNA#50751_1_copies:polyA_is_-1 coordinates are BetaCoV/England/02/2020; mRNA#74815_1_copies:polyA_is_-1 coordinates are BetaCoV/England/02/2020; SARS2_pp1ab_nsp8; mRNA#53608_1_copies:polyA_is_-1 coordinates are BetaCoV/England/02/2020; mRNA#46677_1_copies:polyA_is_-1 coordinates are BetaCoV/England/02/2020; mRN…
SARS2_ORF1a	9	4004	4014	MADQAMTQMYK	MESLVPGFNEKTHVQLSLPVLQVRDVLVRGFGDSVEEVLSEARQHLKDGTCGLVEVEKGVLPQLEQPYVFIKRSDARTAPHGHVMVELVAELEGIQYGRSGETLGVLVPHVGEIPVAYRKVLLRKNGNKGAGGHSYGADLKSFDLGDELGTDPYEDFQENWNTKHSSGVTRELMRELNGGAYTRYVDNNFCGPDGYPLECIKDLLARAGKASCTLSEQLDFIDTKRGVYCCREHEHEIAWYTERSEKSYELQTPFEIKLAKKFDTFNGECPNFVFPLNSIIKTIQPRVEKKKLDGFMGRIRSVYPVASPNECNQMCLSTLMKCDHCGETSWQTGDFVKATCEFCGTENLTKEGATTCGYLPQNAVVKIYCPACHNSEVGPEHSLAEYHNESGLKTILRK…	mRNA#30961_1_copies:polyA_is_-1 coordinates are BetaCoV/England/02/2020; SARS2_ORF1a; mRNA#50751_1_copies:polyA_is_-1 coordinates are BetaCoV/England/02/2020; mRNA#74815_1_copies:polyA_is_-1 coordinates are BetaCoV/England/02/2020; SARS2_pp1ab_nsp8; mRNA#53608_1_copies:polyA_is_-1 coordinates are BetaCoV/England/02/2020; mRNA#46677_1_copies:polyA_is_-1 coordinates are BetaCoV/England/02/2020; mRN…
SARS2_ORF1a	14	4025	4038	VTSAMQTMLFTMLR	MESLVPGFNEKTHVQLSLPVLQVRDVLVRGFGDSVEEVLSEARQHLKDGTCGLVEVEKGVLPQLEQPYVFIKRSDARTAPHGHVMVELVAELEGIQYGRSGETLGVLVPHVGEIPVAYRKVLLRKNGNKGAGGHSYGADLKSFDLGDELGTDPYEDFQENWNTKHSSGVTRELMRELNGGAYTRYVDNNFCGPDGYPLECIKDLLARAGKASCTLSEQLDFIDTKRGVYCCREHEHEIAWYTERSEKSYELQTPFEIKLAKKFDTFNGECPNFVFPLNSIIKTIQPRVEKKKLDGFMGRIRSVYPVASPNECNQMCLSTLMKCDHCGETSWQTGDFVKATCEFCGTENLTKEGATTCGYLPQNAVVKIYCPACHNSEVGPEHSLAEYHNESGLKTILRK…	mRNA#30961_1_copies:polyA_is_-1 coordinates are BetaCoV/England/02/2020; SARS2_ORF1a; mRNA#50751_1_copies:polyA_is_-1 coordinates are BetaCoV/England/02/2020; mRNA#74716_1_copies:polyA_is_-1 coordinates are BetaCoV/England/02/2020; SARS2_pp1ab_nsp8; mRNA#53608_1_copies:polyA_is_-1 coordinates are BetaCoV/England/02/2020; mRNA#46677_1_copies:polyA_is_-1 coordinates are BetaCoV/England/02/2020; mRN…
SARS2_ORF1a	16	4039	4053	KLDNDALNNIINNAR	MESLVPGFNEKTHVQLSLPVLQVRDVLVRGFGDSVEEVLSEARQHLKDGTCGLVEVEKGVLPQLEQPYVFIKRSDARTAPHGHVMVELVAELEGIQYGRSGETLGVLVPHVGEIPVAYRKVLLRKNGNKGAGGHSYGADLKSFDLGDELGTDPYEDFQENWNTKHSSGVTRELMRELNGGAYTRYVDNNFCGPDGYPLECIKDLLARAGKASCTLSEQLDFIDTKRGVYCCREHEHEIAWYTERSEKSYELQTPFEIKLAKKFDTFNGECPNFVFPLNSIIKTIQPRVEKKKLDGFMGRIRSVYPVASPNECNQMCLSTLMKCDHCGETSWQTGDFVKATCEFCGTENLTKEGATTCGYLPQNAVVKIYCPACHNSEVGPEHSLAEYHNESGLKTILRK…	mRNA#30961_1_copies:polyA_is_-1 coordinates are BetaCoV/England/02/2020; SARS2_ORF1a; mRNA#50751_1_copies:polyA_is_-1 coordinates are BetaCoV/England/02/2020; mRNA#74716_1_copies:polyA_is_-1 coordinates are BetaCoV/England/02/2020; SARS2_pp1ab_nsp8; mRNA#46677_1_copies:polyA_is_-1 coordinates are BetaCoV/England/02/2020; mRNA#38535_1_copies:polyA_is_-1 coordinates are BetaCoV/England/02/2020; mRN…
SARS2_ORF1a	3	4040	4053	LDNDALNNIINNAR	MESLVPGFNEKTHVQLSLPVLQVRDVLVRGFGDSVEEVLSEARQHLKDGTCGLVEVEKGVLPQLEQPYVFIKRSDARTAPHGHVMVELVAELEGIQYGRSGETLGVLVPHVGEIPVAYRKVLLRKNGNKGAGGHSYGADLKSFDLGDELGTDPYEDFQENWNTKHSSGVTRELMRELNGGAYTRYVDNNFCGPDGYPLECIKDLLARAGKASCTLSEQLDFIDTKRGVYCCREHEHEIAWYTERSEKSYELQTPFEIKLAKKFDTFNGECPNFVFPLNSIIKTIQPRVEKKKLDGFMGRIRSVYPVASPNECNQMCLSTLMKCDHCGETSWQTGDFVKATCEFCGTENLTKEGATTCGYLPQNAVVKIYCPACHNSEVGPEHSLAEYHNESGLKTILRK…	mRNA#30961_1_copies:polyA_is_-1 coordinates are BetaCoV/England/02/2020; SARS2_ORF1a; mRNA#50751_1_copies:polyA_is_-1 coordinates are BetaCoV/England/02/2020; mRNA#74716_1_copies:polyA_is_-1 coordinates are BetaCoV/England/02/2020; SARS2_pp1ab_nsp8; mRNA#46677_1_copies:polyA_is_-1 coordinates are BetaCoV/England/02/2020; mRNA#38535_1_copies:polyA_is_-1 coordinates are BetaCoV/England/02/2020; mRN…
SARS2_ORF1a	15	4054	4069	DGCVPLNIIPLTTAAK	MESLVPGFNEKTHVQLSLPVLQVRDVLVRGFGDSVEEVLSEARQHLKDGTCGLVEVEKGVLPQLEQPYVFIKRSDARTAPHGHVMVELVAELEGIQYGRSGETLGVLVPHVGEIPVAYRKVLLRKNGNKGAGGHSYGADLKSFDLGDELGTDPYEDFQENWNTKHSSGVTRELMRELNGGAYTRYVDNNFCGPDGYPLECIKDLLARAGKASCTLSEQLDFIDTKRGVYCCREHEHEIAWYTERSEKSYELQTPFEIKLAKKFDTFNGECPNFVFPLNSIIKTIQPRVEKKKLDGFMGRIRSVYPVASPNECNQMCLSTLMKCDHCGETSWQTGDFVKATCEFCGTENLTKEGATTCGYLPQNAVVKIYCPACHNSEVGPEHSLAEYHNESGLKTILRK…	mRNA#30961_1_copies:polyA_is_-1 coordinates are BetaCoV/England/02/2020; SARS2_ORF1a; mRNA#50751_1_copies:polyA_is_-1 coordinates are BetaCoV/England/02/2020; mRNA#74716_1_copies:polyA_is_-1 coordinates are BetaCoV/England/02/2020; SARS2_pp1ab_nsp8; mRNA#46677_1_copies:polyA_is_-1 coordinates are BetaCoV/England/02/2020; mRNA#38535_1_copies:polyA_is_-1 coordinates are BetaCoV/England/02/2020; mRN…
SARS2_ORF1a	28	4070	4081	LMVVIPDYNTYK	MESLVPGFNEKTHVQLSLPVLQVRDVLVRGFGDSVEEVLSEARQHLKDGTCGLVEVEKGVLPQLEQPYVFIKRSDARTAPHGHVMVELVAELEGIQYGRSGETLGVLVPHVGEIPVAYRKVLLRKNGNKGAGGHSYGADLKSFDLGDELGTDPYEDFQENWNTKHSSGVTRELMRELNGGAYTRYVDNNFCGPDGYPLECIKDLLARAGKASCTLSEQLDFIDTKRGVYCCREHEHEIAWYTERSEKSYELQTPFEIKLAKKFDTFNGECPNFVFPLNSIIKTIQPRVEKKKLDGFMGRIRSVYPVASPNECNQMCLSTLMKCDHCGETSWQTGDFVKATCEFCGTENLTKEGATTCGYLPQNAVVKIYCPACHNSEVGPEHSLAEYHNESGLKTILRK…	mRNA#30961_1_copies:polyA_is_-1 coordinates are BetaCoV/England/02/2020; SARS2_ORF1a; mRNA#50751_1_copies:polyA_is_-1 coordinates are BetaCoV/England/02/2020; mRNA#74716_1_copies:polyA_is_-1 coordinates are BetaCoV/England/02/2020; SARS2_pp1ab_nsp8; mRNA#46677_1_copies:polyA_is_-1 coordinates are BetaCoV/England/02/2020; mRNA#38535_1_copies:polyA_is_-1 coordinates are BetaCoV/England/02/2020; mRN…
SARS2_ORF1a	1	4108	4132	IVQLSEISMDNSPNLAWPLIVTALR	MESLVPGFNEKTHVQLSLPVLQVRDVLVRGFGDSVEEVLSEARQHLKDGTCGLVEVEKGVLPQLEQPYVFIKRSDARTAPHGHVMVELVAELEGIQYGRSGETLGVLVPHVGEIPVAYRKVLLRKNGNKGAGGHSYGADLKSFDLGDELGTDPYEDFQENWNTKHSSGVTRELMRELNGGAYTRYVDNNFCGPDGYPLECIKDLLARAGKASCTLSEQLDFIDTKRGVYCCREHEHEIAWYTERSEKSYELQTPFEIKLAKKFDTFNGECPNFVFPLNSIIKTIQPRVEKKKLDGFMGRIRSVYPVASPNECNQMCLSTLMKCDHCGETSWQTGDFVKATCEFCGTENLTKEGATTCGYLPQNAVVKIYCPACHNSEVGPEHSLAEYHNESGLKTILRK…	mRNA#30961_1_copies:polyA_is_-1 coordinates are BetaCoV/England/02/2020; SARS2_ORF1a; mRNA#50751_1_copies:polyA_is_-1 coordinates are BetaCoV/England/02/2020; mRNA#10553_2_copies:polyA_is_-1 coordinates are BetaCoV/England/02/2020; mRNA#74716_1_copies:polyA_is_-1 coordinates are BetaCoV/England/02/2020; SARS2_pp1ab_nsp8; mRNA#38535_1_copies:polyA_is_-1 coordinates are BetaCoV/England/02/2020; mRN…
SARS2_ORF1a	4	4139	4150	LQNNELSPVALR	MESLVPGFNEKTHVQLSLPVLQVRDVLVRGFGDSVEEVLSEARQHLKDGTCGLVEVEKGVLPQLEQPYVFIKRSDARTAPHGHVMVELVAELEGIQYGRSGETLGVLVPHVGEIPVAYRKVLLRKNGNKGAGGHSYGADLKSFDLGDELGTDPYEDFQENWNTKHSSGVTRELMRELNGGAYTRYVDNNFCGPDGYPLECIKDLLARAGKASCTLSEQLDFIDTKRGVYCCREHEHEIAWYTERSEKSYELQTPFEIKLAKKFDTFNGECPNFVFPLNSIIKTIQPRVEKKKLDGFMGRIRSVYPVASPNECNQMCLSTLMKCDHCGETSWQTGDFVKATCEFCGTENLTKEGATTCGYLPQNAVVKIYCPACHNSEVGPEHSLAEYHNESGLKTILRK…	mRNA#30961_1_copies:polyA_is_-1 coordinates are BetaCoV/England/02/2020; SARS2_ORF1a; mRNA#50751_1_copies:polyA_is_-1 coordinates are BetaCoV/England/02/2020; mRNA#10553_2_copies:polyA_is_-1 coordinates are BetaCoV/England/02/2020; mRNA#74716_1_copies:polyA_is_-1 coordinates are BetaCoV/England/02/2020; mRNA#69111_1_copies:polyA_is_-1 coordinates are BetaCoV/England/02/2020; mRNA#38535_1_copies:p…
SARS2_ORF1a	13	4180	4192	FVLALLSDLQDLK	MESLVPGFNEKTHVQLSLPVLQVRDVLVRGFGDSVEEVLSEARQHLKDGTCGLVEVEKGVLPQLEQPYVFIKRSDARTAPHGHVMVELVAELEGIQYGRSGETLGVLVPHVGEIPVAYRKVLLRKNGNKGAGGHSYGADLKSFDLGDELGTDPYEDFQENWNTKHSSGVTRELMRELNGGAYTRYVDNNFCGPDGYPLECIKDLLARAGKASCTLSEQLDFIDTKRGVYCCREHEHEIAWYTERSEKSYELQTPFEIKLAKKFDTFNGECPNFVFPLNSIIKTIQPRVEKKKLDGFMGRIRSVYPVASPNECNQMCLSTLMKCDHCGETSWQTGDFVKATCEFCGTENLTKEGATTCGYLPQNAVVKIYCPACHNSEVGPEHSLAEYHNESGLKTILRK…	mRNA#30961_1_copies:polyA_is_-1 coordinates are BetaCoV/England/02/2020; SARS2_ORF1a; mRNA#50751_1_copies:polyA_is_-1 coordinates are BetaCoV/England/02/2020; mRNA#10553_2_copies:polyA_is_-1 coordinates are BetaCoV/England/02/2020; SARS2_pp1ab_nsp9; mRNA#38535_1_copies:polyA_is_-1 coordinates are BetaCoV/England/02/2020; mRNA#48044_1_copies:polyA_is_-1 coordinates are BetaCoV/England/02/2020; mRN…
SARS2_ORF1a	3	4227	4232	YLYFIK	MESLVPGFNEKTHVQLSLPVLQVRDVLVRGFGDSVEEVLSEARQHLKDGTCGLVEVEKGVLPQLEQPYVFIKRSDARTAPHGHVMVELVAELEGIQYGRSGETLGVLVPHVGEIPVAYRKVLLRKNGNKGAGGHSYGADLKSFDLGDELGTDPYEDFQENWNTKHSSGVTRELMRELNGGAYTRYVDNNFCGPDGYPLECIKDLLARAGKASCTLSEQLDFIDTKRGVYCCREHEHEIAWYTERSEKSYELQTPFEIKLAKKFDTFNGECPNFVFPLNSIIKTIQPRVEKKKLDGFMGRIRSVYPVASPNECNQMCLSTLMKCDHCGETSWQTGDFVKATCEFCGTENLTKEGATTCGYLPQNAVVKIYCPACHNSEVGPEHSLAEYHNESGLKTILRK…	mRNA#30961_1_copies:polyA_is_-1 coordinates are BetaCoV/England/02/2020; SARS2_ORF1a; mRNA#50751_1_copies:polyA_is_-1 coordinates are BetaCoV/England/02/2020; mRNA#10553_2_copies:polyA_is_-1 coordinates are BetaCoV/England/02/2020; SARS2_pp1ab_nsp9; mRNA#38535_1_copies:polyA_is_-1 coordinates are BetaCoV/England/02/2020; mRNA#48044_1_copies:polyA_is_-1 coordinates are BetaCoV/England/02/2020; mRN…
SARS2_ORF1a	6	4240	4251	GMVLGSLAATVR	MESLVPGFNEKTHVQLSLPVLQVRDVLVRGFGDSVEEVLSEARQHLKDGTCGLVEVEKGVLPQLEQPYVFIKRSDARTAPHGHVMVELVAELEGIQYGRSGETLGVLVPHVGEIPVAYRKVLLRKNGNKGAGGHSYGADLKSFDLGDELGTDPYEDFQENWNTKHSSGVTRELMRELNGGAYTRYVDNNFCGPDGYPLECIKDLLARAGKASCTLSEQLDFIDTKRGVYCCREHEHEIAWYTERSEKSYELQTPFEIKLAKKFDTFNGECPNFVFPLNSIIKTIQPRVEKKKLDGFMGRIRSVYPVASPNECNQMCLSTLMKCDHCGETSWQTGDFVKATCEFCGTENLTKEGATTCGYLPQNAVVKIYCPACHNSEVGPEHSLAEYHNESGLKTILRK…	mRNA#30961_1_copies:polyA_is_-1 coordinates are BetaCoV/England/02/2020; SARS2_ORF1a; mRNA#50751_1_copies:polyA_is_-1 coordinates are BetaCoV/England/02/2020; mRNA#10553_2_copies:polyA_is_-1 coordinates are BetaCoV/England/02/2020; SARS2_pp1ab_nsp9; mRNA#38535_1_copies:polyA_is_-1 coordinates are BetaCoV/England/02/2020; mRNA#48044_1_copies:polyA_is_-1 coordinates are BetaCoV/England/02/2020; mRN…
SARS2_ORF1a	2	4252	4278	LQAGNATEVPANSTVLSFCAFAVDAAK	MESLVPGFNEKTHVQLSLPVLQVRDVLVRGFGDSVEEVLSEARQHLKDGTCGLVEVEKGVLPQLEQPYVFIKRSDARTAPHGHVMVELVAELEGIQYGRSGETLGVLVPHVGEIPVAYRKVLLRKNGNKGAGGHSYGADLKSFDLGDELGTDPYEDFQENWNTKHSSGVTRELMRELNGGAYTRYVDNNFCGPDGYPLECIKDLLARAGKASCTLSEQLDFIDTKRGVYCCREHEHEIAWYTERSEKSYELQTPFEIKLAKKFDTFNGECPNFVFPLNSIIKTIQPRVEKKKLDGFMGRIRSVYPVASPNECNQMCLSTLMKCDHCGETSWQTGDFVKATCEFCGTENLTKEGATTCGYLPQNAVVKIYCPACHNSEVGPEHSLAEYHNESGLKTILRK…	mRNA#30961_1_copies:polyA_is_-1 coordinates are BetaCoV/England/02/2020; SARS2_ORF1a; mRNA#50751_1_copies:polyA_is_-1 coordinates are BetaCoV/England/02/2020; mRNA#10553_2_copies:polyA_is_-1 coordinates are BetaCoV/England/02/2020; mRNA#38535_1_copies:polyA_is_-1 coordinates are BetaCoV/England/02/2020; mRNA#48044_1_copies:polyA_is_-1 coordinates are BetaCoV/England/02/2020; mRNA#15325_1_copies:p…
SARS2_ORF1a	3	4279	4296	AYKDYLASGGQPITNCVK	MESLVPGFNEKTHVQLSLPVLQVRDVLVRGFGDSVEEVLSEARQHLKDGTCGLVEVEKGVLPQLEQPYVFIKRSDARTAPHGHVMVELVAELEGIQYGRSGETLGVLVPHVGEIPVAYRKVLLRKNGNKGAGGHSYGADLKSFDLGDELGTDPYEDFQENWNTKHSSGVTRELMRELNGGAYTRYVDNNFCGPDGYPLECIKDLLARAGKASCTLSEQLDFIDTKRGVYCCREHEHEIAWYTERSEKSYELQTPFEIKLAKKFDTFNGECPNFVFPLNSIIKTIQPRVEKKKLDGFMGRIRSVYPVASPNECNQMCLSTLMKCDHCGETSWQTGDFVKATCEFCGTENLTKEGATTCGYLPQNAVVKIYCPACHNSEVGPEHSLAEYHNESGLKTILRK…	mRNA#30961_1_copies:polyA_is_-1 coordinates are BetaCoV/England/02/2020; SARS2_ORF1a; mRNA#50751_1_copies:polyA_is_-1 coordinates are BetaCoV/England/02/2020; mRNA#10553_2_copies:polyA_is_-1 coordinates are BetaCoV/England/02/2020; mRNA#38535_1_copies:polyA_is_-1 coordinates are BetaCoV/England/02/2020; mRNA#48044_1_copies:polyA_is_-1 coordinates are BetaCoV/England/02/2020; mRNA#15325_1_copies:p…
SARS2_ORF1a	4	4282	4296	DYLASGGQPITNCVK	MESLVPGFNEKTHVQLSLPVLQVRDVLVRGFGDSVEEVLSEARQHLKDGTCGLVEVEKGVLPQLEQPYVFIKRSDARTAPHGHVMVELVAELEGIQYGRSGETLGVLVPHVGEIPVAYRKVLLRKNGNKGAGGHSYGADLKSFDLGDELGTDPYEDFQENWNTKHSSGVTRELMRELNGGAYTRYVDNNFCGPDGYPLECIKDLLARAGKASCTLSEQLDFIDTKRGVYCCREHEHEIAWYTERSEKSYELQTPFEIKLAKKFDTFNGECPNFVFPLNSIIKTIQPRVEKKKLDGFMGRIRSVYPVASPNECNQMCLSTLMKCDHCGETSWQTGDFVKATCEFCGTENLTKEGATTCGYLPQNAVVKIYCPACHNSEVGPEHSLAEYHNESGLKTILRK…	mRNA#30961_1_copies:polyA_is_-1 coordinates are BetaCoV/England/02/2020; SARS2_ORF1a; mRNA#50751_1_copies:polyA_is_-1 coordinates are BetaCoV/England/02/2020; mRNA#10553_2_copies:polyA_is_-1 coordinates are BetaCoV/England/02/2020; mRNA#38535_1_copies:polyA_is_-1 coordinates are BetaCoV/England/02/2020; mRNA#48044_1_copies:polyA_is_-1 coordinates are BetaCoV/England/02/2020; mRNA#15325_1_copies:p…
SARS2_ORF1a	5	4349	4366	YVQIPTTCANDPVGFTLK	MESLVPGFNEKTHVQLSLPVLQVRDVLVRGFGDSVEEVLSEARQHLKDGTCGLVEVEKGVLPQLEQPYVFIKRSDARTAPHGHVMVELVAELEGIQYGRSGETLGVLVPHVGEIPVAYRKVLLRKNGNKGAGGHSYGADLKSFDLGDELGTDPYEDFQENWNTKHSSGVTRELMRELNGGAYTRYVDNNFCGPDGYPLECIKDLLARAGKASCTLSEQLDFIDTKRGVYCCREHEHEIAWYTERSEKSYELQTPFEIKLAKKFDTFNGECPNFVFPLNSIIKTIQPRVEKKKLDGFMGRIRSVYPVASPNECNQMCLSTLMKCDHCGETSWQTGDFVKATCEFCGTENLTKEGATTCGYLPQNAVVKIYCPACHNSEVGPEHSLAEYHNESGLKTILRK…	mRNA#30961_1_copies:polyA_is_-1 coordinates are BetaCoV/England/02/2020; SARS2_ORF1a; mRNA#50751_1_copies:polyA_is_-1 coordinates are BetaCoV/England/02/2020; mRNA#10553_2_copies:polyA_is_-1 coordinates are BetaCoV/England/02/2020; mRNA#38535_1_copies:polyA_is_-1 coordinates are BetaCoV/England/02/2020; mRNA#48044_1_copies:polyA_is_-1 coordinates are BetaCoV/England/02/2020; mRNA#15325_1_copies:p…
SARS2_ORF1a	8	4367	4377	NTVCTVCGMWK	MESLVPGFNEKTHVQLSLPVLQVRDVLVRGFGDSVEEVLSEARQHLKDGTCGLVEVEKGVLPQLEQPYVFIKRSDARTAPHGHVMVELVAELEGIQYGRSGETLGVLVPHVGEIPVAYRKVLLRKNGNKGAGGHSYGADLKSFDLGDELGTDPYEDFQENWNTKHSSGVTRELMRELNGGAYTRYVDNNFCGPDGYPLECIKDLLARAGKASCTLSEQLDFIDTKRGVYCCREHEHEIAWYTERSEKSYELQTPFEIKLAKKFDTFNGECPNFVFPLNSIIKTIQPRVEKKKLDGFMGRIRSVYPVASPNECNQMCLSTLMKCDHCGETSWQTGDFVKATCEFCGTENLTKEGATTCGYLPQNAVVKIYCPACHNSEVGPEHSLAEYHNESGLKTILRK…	mRNA#30961_1_copies:polyA_is_-1 coordinates are BetaCoV/England/02/2020; SARS2_ORF1a; mRNA#50751_1_copies:polyA_is_-1 coordinates are BetaCoV/England/02/2020; mRNA#10553_2_copies:polyA_is_-1 coordinates are BetaCoV/England/02/2020; mRNA#38535_1_copies:polyA_is_-1 coordinates are BetaCoV/England/02/2020; mRNA#48044_1_copies:polyA_is_-1 coordinates are BetaCoV/England/02/2020; mRNA#15325_1_copies:p…
SARS2_ORF8	6	53	68	KSAPLIELCVDEAGSK	MKFLVFLGIITTVAAFHQECSLQSCTQHQPYVVDDPCPIHFYSKWYIRVGARKSAPLIELCVDEAGSKSPIQYIDIGNYTVSCLPFTINCQEPKLGSLVVRCSFYEDFLEYHDVRVVLDFI	mRNA#67036_1_copies:polyA_is_-1 coordinates are BetaCoV/England/02/2020; mRNA#57139_1_copies:polyA_is_-1 coordinates are BetaCoV/England/02/2020; mRNA#56915_1_copies:polyA_is_-1 coordinates are BetaCoV/England/02/2020; mRNA#10896_1_copies:polyA_is_-1 coordinates are BetaCoV/England/02/2020; mRNA#53929_1_copies:polyA_is_-1 coordinates are BetaCoV/England/02/2020; mRNA#59624_1_copies:polyA_is_-1 co…
SARS2_ORF8	6	54	68	SAPLIELCVDEAGSK	MKFLVFLGIITTVAAFHQECSLQSCTQHQPYVVDDPCPIHFYSKWYIRVGARKSAPLIELCVDEAGSKSPIQYIDIGNYTVSCLPFTINCQEPKLGSLVVRCSFYEDFLEYHDVRVVLDFI	mRNA#67036_1_copies:polyA_is_-1 coordinates are BetaCoV/England/02/2020; mRNA#57139_1_copies:polyA_is_-1 coordinates are BetaCoV/England/02/2020; mRNA#56915_1_copies:polyA_is_-1 coordinates are BetaCoV/England/02/2020; mRNA#10896_1_copies:polyA_is_-1 coordinates are BetaCoV/England/02/2020; mRNA#53929_1_copies:polyA_is_-1 coordinates are BetaCoV/England/02/2020; mRNA#59624_1_copies:polyA_is_-1 co…
SARS2_ORF8	21	102	115	CSFYEDFLEYHDVR	MKFLVFLGIITTVAAFHQECSLQSCTQHQPYVVDDPCPIHFYSKWYIRVGARKSAPLIELCVDEAGSKSPIQYIDIGNYTVSCLPFTINCQEPKLGSLVVRCSFYEDFLEYHDVRVVLDFI	mRNA#56915_1_copies:polyA_is_-1 coordinates are BetaCoV/England/02/2020; mRNA#69874_1_copies:polyA_is_-1 coordinates are BetaCoV/England/02/2020; mRNA#53929_1_copies:polyA_is_-1 coordinates are BetaCoV/England/02/2020; mRNA#59624_1_copies:polyA_is_-1 coordinates are BetaCoV/England/02/2020; mRNA#54096_1_copies:polyA_is_-1 coordinates are BetaCoV/England/02/2020; mRNA#12111_1_copies:polyA_is_-1 co…
SARS2_ORF9a	10	5	13	ISEMHPALR	MDPKISEMHPALRLVDPQIQLAVTRMENAVGRDQNNVGPKVYPIILRLGSPLSLNMARKTLNSLEDKAFQLTPIAVQMTKLATTEELPDEFVVVTVK	mRNA#58688_1_copies:polyA_is_-1 coordinates are BetaCoV/England/02/2020; mRNA#12918_1_copies:polyA_is_-1 coordinates are BetaCoV/England/02/2020; mRNA#66827_1_copies:polyA_is_-1 coordinates are BetaCoV/England/02/2020; mRNA#59624_1_copies:polyA_is_-1 coordinates are BetaCoV/England/02/2020; mRNA#22079_1_copies:polyA_is_-1 coordinates are BetaCoV/England/02/2020; mRNA#57924_1_copies:polyA_is_-1 co…
SARS2_ORF9a	19	14	25	LVDPQIQLAVTR	MDPKISEMHPALRLVDPQIQLAVTRMENAVGRDQNNVGPKVYPIILRLGSPLSLNMARKTLNSLEDKAFQLTPIAVQMTKLATTEELPDEFVVVTVK	mRNA#41662_1_copies:polyA_is_-1 coordinates are BetaCoV/England/02/2020; mRNA#58688_1_copies:polyA_is_-1 coordinates are BetaCoV/England/02/2020; mRNA#66827_1_copies:polyA_is_-1 coordinates are BetaCoV/England/02/2020; mRNA#40312_1_copies:polyA_is_-1 coordinates are BetaCoV/England/02/2020; mRNA#59624_1_copies:polyA_is_-1 coordinates are BetaCoV/England/02/2020; mRNA#22079_1_copies:polyA_is_-1 co…
SARS2_ORF9a	1	26	32	MENAVGR	MDPKISEMHPALRLVDPQIQLAVTRMENAVGRDQNNVGPKVYPIILRLGSPLSLNMARKTLNSLEDKAFQLTPIAVQMTKLATTEELPDEFVVVTVK	mRNA#41662_1_copies:polyA_is_-1 coordinates are BetaCoV/England/02/2020; mRNA#52895_1_copies:polyA_is_-1 coordinates are BetaCoV/England/02/2020; mRNA#28378_1_copies:polyA_is_-1 coordinates are BetaCoV/England/02/2020; mRNA#9320_2_copies:polyA_is_-1 coordinates are BetaCoV/England/02/2020; mRNA#61807_1_copies:polyA_is_-1 coordinates are BetaCoV/England/02/2020; mRNA#58688_1_copies:polyA_is_-1 coo…
SARS2_ORF9a	8	26	40	MENAVGRDQNNVGPK	MDPKISEMHPALRLVDPQIQLAVTRMENAVGRDQNNVGPKVYPIILRLGSPLSLNMARKTLNSLEDKAFQLTPIAVQMTKLATTEELPDEFVVVTVK	mRNA#41662_1_copies:polyA_is_-1 coordinates are BetaCoV/England/02/2020; mRNA#52895_1_copies:polyA_is_-1 coordinates are BetaCoV/England/02/2020; mRNA#28378_1_copies:polyA_is_-1 coordinates are BetaCoV/England/02/2020; mRNA#9320_2_copies:polyA_is_-1 coordinates are BetaCoV/England/02/2020; mRNA#61807_1_copies:polyA_is_-1 coordinates are BetaCoV/England/02/2020; mRNA#58688_1_copies:polyA_is_-1 coo…
SARS2_ORF9a	1	33	47	DQNNVGPKVYPIILR	MDPKISEMHPALRLVDPQIQLAVTRMENAVGRDQNNVGPKVYPIILRLGSPLSLNMARKTLNSLEDKAFQLTPIAVQMTKLATTEELPDEFVVVTVK	mRNA#41662_1_copies:polyA_is_-1 coordinates are BetaCoV/England/02/2020; mRNA#52895_1_copies:polyA_is_-1 coordinates are BetaCoV/England/02/2020; mRNA#28378_1_copies:polyA_is_-1 coordinates are BetaCoV/England/02/2020; mRNA#9320_2_copies:polyA_is_-1 coordinates are BetaCoV/England/02/2020; mRNA#61807_1_copies:polyA_is_-1 coordinates are BetaCoV/England/02/2020; mRNA#58688_1_copies:polyA_is_-1 coo…
SARS2_ORF9a	11	41	47	VYPIILR	MDPKISEMHPALRLVDPQIQLAVTRMENAVGRDQNNVGPKVYPIILRLGSPLSLNMARKTLNSLEDKAFQLTPIAVQMTKLATTEELPDEFVVVTVK	mRNA#41662_1_copies:polyA_is_-1 coordinates are BetaCoV/England/02/2020; mRNA#52895_1_copies:polyA_is_-1 coordinates are BetaCoV/England/02/2020; mRNA#28378_1_copies:polyA_is_-1 coordinates are BetaCoV/England/02/2020; mRNA#9320_2_copies:polyA_is_-1 coordinates are BetaCoV/England/02/2020; mRNA#39304_1_copies:polyA_is_-1 coordinates are BetaCoV/England/02/2020; mRNA#61807_1_copies:polyA_is_-1 coo…
SARS2_ORF9a	12	48	58	LGSPLSLNMAR	MDPKISEMHPALRLVDPQIQLAVTRMENAVGRDQNNVGPKVYPIILRLGSPLSLNMARKTLNSLEDKAFQLTPIAVQMTKLATTEELPDEFVVVTVK	mRNA#41662_1_copies:polyA_is_-1 coordinates are BetaCoV/England/02/2020; mRNA#52895_1_copies:polyA_is_-1 coordinates are BetaCoV/England/02/2020; mRNA#28378_1_copies:polyA_is_-1 coordinates are BetaCoV/England/02/2020; mRNA#9320_2_copies:polyA_is_-1 coordinates are BetaCoV/England/02/2020; mRNA#39304_1_copies:polyA_is_-1 coordinates are BetaCoV/England/02/2020; mRNA#61807_1_copies:polyA_is_-1 coo…
SARS2_ORF9a	5	59	67	KTLNSLEDK	MDPKISEMHPALRLVDPQIQLAVTRMENAVGRDQNNVGPKVYPIILRLGSPLSLNMARKTLNSLEDKAFQLTPIAVQMTKLATTEELPDEFVVVTVK	mRNA#41662_1_copies:polyA_is_-1 coordinates are BetaCoV/England/02/2020; mRNA#52895_1_copies:polyA_is_-1 coordinates are BetaCoV/England/02/2020; mRNA#28378_1_copies:polyA_is_-1 coordinates are BetaCoV/England/02/2020; mRNA#6961_2_copies:polyA_is_-1 coordinates are BetaCoV/England/02/2020; mRNA#9320_2_copies:polyA_is_-1 coordinates are BetaCoV/England/02/2020; mRNA#39304_1_copies:polyA_is_-1 coor…
SARS2_ORF9a	2	59	80	KTLNSLEDKAFQLTPIAVQMTK	MDPKISEMHPALRLVDPQIQLAVTRMENAVGRDQNNVGPKVYPIILRLGSPLSLNMARKTLNSLEDKAFQLTPIAVQMTKLATTEELPDEFVVVTVK	mRNA#41662_1_copies:polyA_is_-1 coordinates are BetaCoV/England/02/2020; mRNA#52895_1_copies:polyA_is_-1 coordinates are BetaCoV/England/02/2020; mRNA#9320_2_copies:polyA_is_-1 coordinates are BetaCoV/England/02/2020; mRNA#39304_1_copies:polyA_is_-1 coordinates are BetaCoV/England/02/2020; mRNA#78313_1_copies:polyA_is_-1 coordinates are BetaCoV/England/02/2020; mRNA#61807_1_copies:polyA_is_-1 coo…
SARS2_ORF9a	2	60	67	TLNSLEDK	MDPKISEMHPALRLVDPQIQLAVTRMENAVGRDQNNVGPKVYPIILRLGSPLSLNMARKTLNSLEDKAFQLTPIAVQMTKLATTEELPDEFVVVTVK	mRNA#41662_1_copies:polyA_is_-1 coordinates are BetaCoV/England/02/2020; mRNA#52895_1_copies:polyA_is_-1 coordinates are BetaCoV/England/02/2020; mRNA#28378_1_copies:polyA_is_-1 coordinates are BetaCoV/England/02/2020; mRNA#6961_2_copies:polyA_is_-1 coordinates are BetaCoV/England/02/2020; mRNA#9320_2_copies:polyA_is_-1 coordinates are BetaCoV/England/02/2020; mRNA#39304_1_copies:polyA_is_-1 coor…
SARS2_ORF9a	6	60	80	TLNSLEDKAFQLTPIAVQMTK	MDPKISEMHPALRLVDPQIQLAVTRMENAVGRDQNNVGPKVYPIILRLGSPLSLNMARKTLNSLEDKAFQLTPIAVQMTKLATTEELPDEFVVVTVK	mRNA#41662_1_copies:polyA_is_-1 coordinates are BetaCoV/England/02/2020; mRNA#52895_1_copies:polyA_is_-1 coordinates are BetaCoV/England/02/2020; mRNA#9320_2_copies:polyA_is_-1 coordinates are BetaCoV/England/02/2020; mRNA#39304_1_copies:polyA_is_-1 coordinates are BetaCoV/England/02/2020; mRNA#78313_1_copies:polyA_is_-1 coordinates are BetaCoV/England/02/2020; mRNA#61807_1_copies:polyA_is_-1 coo…
SARS2_ORF9a	26	68	80	AFQLTPIAVQMTK	MDPKISEMHPALRLVDPQIQLAVTRMENAVGRDQNNVGPKVYPIILRLGSPLSLNMARKTLNSLEDKAFQLTPIAVQMTKLATTEELPDEFVVVTVK	mRNA#41662_1_copies:polyA_is_-1 coordinates are BetaCoV/England/02/2020; mRNA#52895_1_copies:polyA_is_-1 coordinates are BetaCoV/England/02/2020; mRNA#9320_2_copies:polyA_is_-1 coordinates are BetaCoV/England/02/2020; mRNA#39304_1_copies:polyA_is_-1 coordinates are BetaCoV/England/02/2020; mRNA#78313_1_copies:polyA_is_-1 coordinates are BetaCoV/England/02/2020; mRNA#61807_1_copies:polyA_is_-1 coo…
SARS2_ORF9a	1	68	97	AFQLTPIAVQMTKLATTEELPDEFVVVTVK	MDPKISEMHPALRLVDPQIQLAVTRMENAVGRDQNNVGPKVYPIILRLGSPLSLNMARKTLNSLEDKAFQLTPIAVQMTKLATTEELPDEFVVVTVK	mRNA#9320_2_copies:polyA_is_-1 coordinates are BetaCoV/England/02/2020; mRNA#39304_1_copies:polyA_is_-1 coordinates are BetaCoV/England/02/2020; mRNA#78313_1_copies:polyA_is_-1 coordinates are BetaCoV/England/02/2020; mRNA#7895_2_copies:polyA_is_-1 coordinates are BetaCoV/England/02/2020; mRNA#14955_1_copies:polyA_is_-1 coordinates are BetaCoV/England/02/2020; mRNA#6804_2_copies:polyA_is_-1 coord…
SARS2_ORF9a	7	81	97	LATTEELPDEFVVVTVK	MDPKISEMHPALRLVDPQIQLAVTRMENAVGRDQNNVGPKVYPIILRLGSPLSLNMARKTLNSLEDKAFQLTPIAVQMTKLATTEELPDEFVVVTVK	mRNA#9320_2_copies:polyA_is_-1 coordinates are BetaCoV/England/02/2020; mRNA#39304_1_copies:polyA_is_-1 coordinates are BetaCoV/England/02/2020; mRNA#19725_1_copies:polyA_is_-1 coordinates are BetaCoV/England/02/2020; mRNA#78313_1_copies:polyA_is_-1 coordinates are BetaCoV/England/02/2020; mRNA#7895_2_copies:polyA_is_-1 coordinates are BetaCoV/England/02/2020; mRNA#14955_1_copies:polyA_is_-1 coor…
SARS2_pp1ab_nsp1	9	12	24	THVQLSLPVLQVR	MESLVPGFNEKTHVQLSLPVLQVRDVLVRGFGDSVEEVLSEARQHLKDGTCGLVEVEKGVLPQLEQPYVFIKRSDARTAPHGHVMVELVAELEGIQYGRSGETLGVLVPHVGEIPVAYRKVLLRKNGNKGAGGHSYGADLKSFDLGDELGTDPYEDFQENWNTKHSSGVTRELMRELNGG	mRNA#51144_1_copies:polyA_is_-1 coordinates are BetaCoV/England/02/2020; mRNA#74677_1_copies:polyA_is_-1 coordinates are BetaCoV/England/02/2020; mRNA#50272_1_copies:polyA_is_-1 coordinates are BetaCoV/England/02/2020; mRNA#44803_1_copies:polyA_is_-1 coordinates are BetaCoV/England/02/2020; mRNA#29090_1_copies:polyA_is_-1 coordinates are BetaCoV/England/02/2020; mRNA#26254_1_copies:polyA_is_-1 co…
SARS2_pp1ab_nsp1	10	30	43	GFGDSVEEVLSEAR	MESLVPGFNEKTHVQLSLPVLQVRDVLVRGFGDSVEEVLSEARQHLKDGTCGLVEVEKGVLPQLEQPYVFIKRSDARTAPHGHVMVELVAELEGIQYGRSGETLGVLVPHVGEIPVAYRKVLLRKNGNKGAGGHSYGADLKSFDLGDELGTDPYEDFQENWNTKHSSGVTRELMRELNGG	mRNA#51144_1_copies:polyA_is_-1 coordinates are BetaCoV/England/02/2020; mRNA#74677_1_copies:polyA_is_-1 coordinates are BetaCoV/England/02/2020; mRNA#50272_1_copies:polyA_is_-1 coordinates are BetaCoV/England/02/2020; mRNA#44803_1_copies:polyA_is_-1 coordinates are BetaCoV/England/02/2020; mRNA#29090_1_copies:polyA_is_-1 coordinates are BetaCoV/England/02/2020; mRNA#26254_1_copies:polyA_is_-1 co…
SARS2_pp1ab_nsp1	1	44	58	QHLKDGTCGLVEVEK	MESLVPGFNEKTHVQLSLPVLQVRDVLVRGFGDSVEEVLSEARQHLKDGTCGLVEVEKGVLPQLEQPYVFIKRSDARTAPHGHVMVELVAELEGIQYGRSGETLGVLVPHVGEIPVAYRKVLLRKNGNKGAGGHSYGADLKSFDLGDELGTDPYEDFQENWNTKHSSGVTRELMRELNGG	mRNA#51144_1_copies:polyA_is_-1 coordinates are BetaCoV/England/02/2020; mRNA#74677_1_copies:polyA_is_-1 coordinates are BetaCoV/England/02/2020; mRNA#50272_1_copies:polyA_is_-1 coordinates are BetaCoV/England/02/2020; mRNA#44803_1_copies:polyA_is_-1 coordinates are BetaCoV/England/02/2020; mRNA#29090_1_copies:polyA_is_-1 coordinates are BetaCoV/England/02/2020; mRNA#26254_1_copies:polyA_is_-1 co…
SARS2_pp1ab_nsp1	3	48	58	DGTCGLVEVEK	MESLVPGFNEKTHVQLSLPVLQVRDVLVRGFGDSVEEVLSEARQHLKDGTCGLVEVEKGVLPQLEQPYVFIKRSDARTAPHGHVMVELVAELEGIQYGRSGETLGVLVPHVGEIPVAYRKVLLRKNGNKGAGGHSYGADLKSFDLGDELGTDPYEDFQENWNTKHSSGVTRELMRELNGG	mRNA#51144_1_copies:polyA_is_-1 coordinates are BetaCoV/England/02/2020; mRNA#74677_1_copies:polyA_is_-1 coordinates are BetaCoV/England/02/2020; mRNA#50272_1_copies:polyA_is_-1 coordinates are BetaCoV/England/02/2020; mRNA#44803_1_copies:polyA_is_-1 coordinates are BetaCoV/England/02/2020; mRNA#29090_1_copies:polyA_is_-1 coordinates are BetaCoV/England/02/2020; mRNA#26254_1_copies:polyA_is_-1 co…
SARS2_pp1ab_nsp1	9	59	72	GVLPQLEQPYVFIK	MESLVPGFNEKTHVQLSLPVLQVRDVLVRGFGDSVEEVLSEARQHLKDGTCGLVEVEKGVLPQLEQPYVFIKRSDARTAPHGHVMVELVAELEGIQYGRSGETLGVLVPHVGEIPVAYRKVLLRKNGNKGAGGHSYGADLKSFDLGDELGTDPYEDFQENWNTKHSSGVTRELMRELNGG	mRNA#51144_1_copies:polyA_is_-1 coordinates are BetaCoV/England/02/2020; mRNA#74677_1_copies:polyA_is_-1 coordinates are BetaCoV/England/02/2020; mRNA#50272_1_copies:polyA_is_-1 coordinates are BetaCoV/England/02/2020; mRNA#44803_1_copies:polyA_is_-1 coordinates are BetaCoV/England/02/2020; mRNA#29090_1_copies:polyA_is_-1 coordinates are BetaCoV/England/02/2020; mRNA#26254_1_copies:polyA_is_-1 co…
SARS2_pp1ab_nsp1	4	59	73	GVLPQLEQPYVFIKR	MESLVPGFNEKTHVQLSLPVLQVRDVLVRGFGDSVEEVLSEARQHLKDGTCGLVEVEKGVLPQLEQPYVFIKRSDARTAPHGHVMVELVAELEGIQYGRSGETLGVLVPHVGEIPVAYRKVLLRKNGNKGAGGHSYGADLKSFDLGDELGTDPYEDFQENWNTKHSSGVTRELMRELNGG	mRNA#51144_1_copies:polyA_is_-1 coordinates are BetaCoV/England/02/2020; mRNA#74677_1_copies:polyA_is_-1 coordinates are BetaCoV/England/02/2020; mRNA#50272_1_copies:polyA_is_-1 coordinates are BetaCoV/England/02/2020; mRNA#44803_1_copies:polyA_is_-1 coordinates are BetaCoV/England/02/2020; mRNA#29090_1_copies:polyA_is_-1 coordinates are BetaCoV/England/02/2020; mRNA#26254_1_copies:polyA_is_-1 co…
SARS2_pp1ab_nsp1	10	100	119	SGETLGVLVPHVGEIPVAYR	MESLVPGFNEKTHVQLSLPVLQVRDVLVRGFGDSVEEVLSEARQHLKDGTCGLVEVEKGVLPQLEQPYVFIKRSDARTAPHGHVMVELVAELEGIQYGRSGETLGVLVPHVGEIPVAYRKVLLRKNGNKGAGGHSYGADLKSFDLGDELGTDPYEDFQENWNTKHSSGVTRELMRELNGG	mRNA#51144_1_copies:polyA_is_-1 coordinates are BetaCoV/England/02/2020; mRNA#74677_1_copies:polyA_is_-1 coordinates are BetaCoV/England/02/2020; mRNA#50272_1_copies:polyA_is_-1 coordinates are BetaCoV/England/02/2020; mRNA#44803_1_copies:polyA_is_-1 coordinates are BetaCoV/England/02/2020; mRNA#29090_1_copies:polyA_is_-1 coordinates are BetaCoV/England/02/2020; mRNA#26254_1_copies:polyA_is_-1 co…
SARS2_pp1ab_nsp1	7	100	120	SGETLGVLVPHVGEIPVAYRK	MESLVPGFNEKTHVQLSLPVLQVRDVLVRGFGDSVEEVLSEARQHLKDGTCGLVEVEKGVLPQLEQPYVFIKRSDARTAPHGHVMVELVAELEGIQYGRSGETLGVLVPHVGEIPVAYRKVLLRKNGNKGAGGHSYGADLKSFDLGDELGTDPYEDFQENWNTKHSSGVTRELMRELNGG	mRNA#51144_1_copies:polyA_is_-1 coordinates are BetaCoV/England/02/2020; mRNA#74677_1_copies:polyA_is_-1 coordinates are BetaCoV/England/02/2020; mRNA#50272_1_copies:polyA_is_-1 coordinates are BetaCoV/England/02/2020; mRNA#44803_1_copies:polyA_is_-1 coordinates are BetaCoV/England/02/2020; mRNA#29090_1_copies:polyA_is_-1 coordinates are BetaCoV/England/02/2020; mRNA#26254_1_copies:polyA_is_-1 co…
SARS2_pp1ab_nsp1	1	126	141	NGNKGAGGHSYGADLK	MESLVPGFNEKTHVQLSLPVLQVRDVLVRGFGDSVEEVLSEARQHLKDGTCGLVEVEKGVLPQLEQPYVFIKRSDARTAPHGHVMVELVAELEGIQYGRSGETLGVLVPHVGEIPVAYRKVLLRKNGNKGAGGHSYGADLKSFDLGDELGTDPYEDFQENWNTKHSSGVTRELMRELNGG	mRNA#51144_1_copies:polyA_is_-1 coordinates are BetaCoV/England/02/2020; mRNA#74677_1_copies:polyA_is_-1 coordinates are BetaCoV/England/02/2020; mRNA#50272_1_copies:polyA_is_-1 coordinates are BetaCoV/England/02/2020; mRNA#44803_1_copies:polyA_is_-1 coordinates are BetaCoV/England/02/2020; mRNA#29090_1_copies:polyA_is_-1 coordinates are BetaCoV/England/02/2020; mRNA#26254_1_copies:polyA_is_-1 co…
SARS2_pp1ab_nsp1	5	130	141	GAGGHSYGADLK	MESLVPGFNEKTHVQLSLPVLQVRDVLVRGFGDSVEEVLSEARQHLKDGTCGLVEVEKGVLPQLEQPYVFIKRSDARTAPHGHVMVELVAELEGIQYGRSGETLGVLVPHVGEIPVAYRKVLLRKNGNKGAGGHSYGADLKSFDLGDELGTDPYEDFQENWNTKHSSGVTRELMRELNGG	mRNA#51144_1_copies:polyA_is_-1 coordinates are BetaCoV/England/02/2020; mRNA#74677_1_copies:polyA_is_-1 coordinates are BetaCoV/England/02/2020; mRNA#50272_1_copies:polyA_is_-1 coordinates are BetaCoV/England/02/2020; mRNA#44803_1_copies:polyA_is_-1 coordinates are BetaCoV/England/02/2020; mRNA#29090_1_copies:polyA_is_-1 coordinates are BetaCoV/England/02/2020; mRNA#26254_1_copies:polyA_is_-1 co…
SARS2_pp1ab_nsp10	2	1	25	AGNATEVPANSTVLSFCAFAVDAAK	AGNATEVPANSTVLSFCAFAVDAAKAYKDYLASGGQPITNCVKMLCTHTGTGQAITVTPEANMDQESFGGASCCLYCRCHIDHPNPKGFCDLKGKYVQIPTTCANDPVGFTLKNTVCTVCGMWKGYGCSCDQLREPMLQ	SARS2_pp1ab_nsp10
SARS2_pp1ab_nsp10	3	26	43	AYKDYLASGGQPITNCVK	AGNATEVPANSTVLSFCAFAVDAAKAYKDYLASGGQPITNCVKMLCTHTGTGQAITVTPEANMDQESFGGASCCLYCRCHIDHPNPKGFCDLKGKYVQIPTTCANDPVGFTLKNTVCTVCGMWKGYGCSCDQLREPMLQ	mRNA#30961_1_copies:polyA_is_-1 coordinates are BetaCoV/England/02/2020; SARS2_ORF1a; mRNA#50751_1_copies:polyA_is_-1 coordinates are BetaCoV/England/02/2020; mRNA#10553_2_copies:polyA_is_-1 coordinates are BetaCoV/England/02/2020; mRNA#38535_1_copies:polyA_is_-1 coordinates are BetaCoV/England/02/2020; mRNA#48044_1_copies:polyA_is_-1 coordinates are BetaCoV/England/02/2020; mRNA#15325_1_copies:p…
SARS2_pp1ab_nsp10	4	29	43	DYLASGGQPITNCVK	AGNATEVPANSTVLSFCAFAVDAAKAYKDYLASGGQPITNCVKMLCTHTGTGQAITVTPEANMDQESFGGASCCLYCRCHIDHPNPKGFCDLKGKYVQIPTTCANDPVGFTLKNTVCTVCGMWKGYGCSCDQLREPMLQ	mRNA#30961_1_copies:polyA_is_-1 coordinates are BetaCoV/England/02/2020; SARS2_ORF1a; mRNA#50751_1_copies:polyA_is_-1 coordinates are BetaCoV/England/02/2020; mRNA#10553_2_copies:polyA_is_-1 coordinates are BetaCoV/England/02/2020; mRNA#38535_1_copies:polyA_is_-1 coordinates are BetaCoV/England/02/2020; mRNA#48044_1_copies:polyA_is_-1 coordinates are BetaCoV/England/02/2020; mRNA#15325_1_copies:p…
SARS2_pp1ab_nsp10	5	96	113	YVQIPTTCANDPVGFTLK	AGNATEVPANSTVLSFCAFAVDAAKAYKDYLASGGQPITNCVKMLCTHTGTGQAITVTPEANMDQESFGGASCCLYCRCHIDHPNPKGFCDLKGKYVQIPTTCANDPVGFTLKNTVCTVCGMWKGYGCSCDQLREPMLQ	mRNA#30961_1_copies:polyA_is_-1 coordinates are BetaCoV/England/02/2020; SARS2_ORF1a; mRNA#50751_1_copies:polyA_is_-1 coordinates are BetaCoV/England/02/2020; mRNA#10553_2_copies:polyA_is_-1 coordinates are BetaCoV/England/02/2020; mRNA#38535_1_copies:polyA_is_-1 coordinates are BetaCoV/England/02/2020; mRNA#48044_1_copies:polyA_is_-1 coordinates are BetaCoV/England/02/2020; mRNA#15325_1_copies:p…
SARS2_pp1ab_nsp10	8	114	124	NTVCTVCGMWK	AGNATEVPANSTVLSFCAFAVDAAKAYKDYLASGGQPITNCVKMLCTHTGTGQAITVTPEANMDQESFGGASCCLYCRCHIDHPNPKGFCDLKGKYVQIPTTCANDPVGFTLKNTVCTVCGMWKGYGCSCDQLREPMLQ	mRNA#30961_1_copies:polyA_is_-1 coordinates are BetaCoV/England/02/2020; SARS2_ORF1a; mRNA#50751_1_copies:polyA_is_-1 coordinates are BetaCoV/England/02/2020; mRNA#10553_2_copies:polyA_is_-1 coordinates are BetaCoV/England/02/2020; mRNA#38535_1_copies:polyA_is_-1 coordinates are BetaCoV/England/02/2020; mRNA#48044_1_copies:polyA_is_-1 coordinates are BetaCoV/England/02/2020; mRNA#15325_1_copies:p…
SARS2_pp1ab_nsp12	4	1	10	SADAQSFLNR	SADAQSFLNRVCGVSAARLTPCGTGTSTDVVYRAFDIYNDKVAGFAKFLKTNCCRFQEKDEDDNLIDSYFVVKRHTFSNYQHEETIYNLLKDCPAVAKHDFFKFRIDGDMVPHISRQRLTKYTMADLVYALRHFDEGNCDTLKEILVTYNCCDDDYFNKKDWYDFVENPDILRVYANLGERVRQALLKTVQFCDAMRNAGIVGVLTLDNQDLNGNWYDFGDFIQTTPGSGVPVVDSYYSLLMPILTLTRALTAESHVDTDLTKPYIKWDLLKYDFTEERLKLFDRYFKYWDQTYHPNCVNCLDDRCILHCANFNVLFSTVFPPTSFGPLVRKIFVDGVPFVVSTGYHFRELGVVHNQDVNLHSSRLSFKELLVYAADPAMHAASGNLLLDKRTTCFSVA…	SARS2_pp1ab_nsp12
SARS2_pp1ab_nsp12	1	11	18	VCGVSAAR	SADAQSFLNRVCGVSAARLTPCGTGTSTDVVYRAFDIYNDKVAGFAKFLKTNCCRFQEKDEDDNLIDSYFVVKRHTFSNYQHEETIYNLLKDCPAVAKHDFFKFRIDGDMVPHISRQRLTKYTMADLVYALRHFDEGNCDTLKEILVTYNCCDDDYFNKKDWYDFVENPDILRVYANLGERVRQALLKTVQFCDAMRNAGIVGVLTLDNQDLNGNWYDFGDFIQTTPGSGVPVVDSYYSLLMPILTLTRALTAESHVDTDLTKPYIKWDLLKYDFTEERLKLFDRYFKYWDQTYHPNCVNCLDDRCILHCANFNVLFSTVFPPTSFGPLVRKIFVDGVPFVVSTGYHFRELGVVHNQDVNLHSSRLSFKELLVYAADPAMHAASGNLLLDKRTTCFSVA…	SARS2_SARS2_Orf1ab_from_genbank; SARS2_pp1ab_nsp12
SARS2_pp1ab_nsp12	6	19	33	LTPCGTGTSTDVVYR	SADAQSFLNRVCGVSAARLTPCGTGTSTDVVYRAFDIYNDKVAGFAKFLKTNCCRFQEKDEDDNLIDSYFVVKRHTFSNYQHEETIYNLLKDCPAVAKHDFFKFRIDGDMVPHISRQRLTKYTMADLVYALRHFDEGNCDTLKEILVTYNCCDDDYFNKKDWYDFVENPDILRVYANLGERVRQALLKTVQFCDAMRNAGIVGVLTLDNQDLNGNWYDFGDFIQTTPGSGVPVVDSYYSLLMPILTLTRALTAESHVDTDLTKPYIKWDLLKYDFTEERLKLFDRYFKYWDQTYHPNCVNCLDDRCILHCANFNVLFSTVFPPTSFGPLVRKIFVDGVPFVVSTGYHFRELGVVHNQDVNLHSSRLSFKELLVYAADPAMHAASGNLLLDKRTTCFSVA…	SARS2_SARS2_Orf1ab_from_genbank; SARS2_pp1ab_nsp12
SARS2_pp1ab_nsp12	7	34	41	AFDIYNDK	SADAQSFLNRVCGVSAARLTPCGTGTSTDVVYRAFDIYNDKVAGFAKFLKTNCCRFQEKDEDDNLIDSYFVVKRHTFSNYQHEETIYNLLKDCPAVAKHDFFKFRIDGDMVPHISRQRLTKYTMADLVYALRHFDEGNCDTLKEILVTYNCCDDDYFNKKDWYDFVENPDILRVYANLGERVRQALLKTVQFCDAMRNAGIVGVLTLDNQDLNGNWYDFGDFIQTTPGSGVPVVDSYYSLLMPILTLTRALTAESHVDTDLTKPYIKWDLLKYDFTEERLKLFDRYFKYWDQTYHPNCVNCLDDRCILHCANFNVLFSTVFPPTSFGPLVRKIFVDGVPFVVSTGYHFRELGVVHNQDVNLHSSRLSFKELLVYAADPAMHAASGNLLLDKRTTCFSVA…	SARS2_SARS2_Orf1ab_from_genbank; SARS2_pp1ab_nsp12
SARS2_pp1ab_nsp12	3	34	47	AFDIYNDKVAGFAK	SADAQSFLNRVCGVSAARLTPCGTGTSTDVVYRAFDIYNDKVAGFAKFLKTNCCRFQEKDEDDNLIDSYFVVKRHTFSNYQHEETIYNLLKDCPAVAKHDFFKFRIDGDMVPHISRQRLTKYTMADLVYALRHFDEGNCDTLKEILVTYNCCDDDYFNKKDWYDFVENPDILRVYANLGERVRQALLKTVQFCDAMRNAGIVGVLTLDNQDLNGNWYDFGDFIQTTPGSGVPVVDSYYSLLMPILTLTRALTAESHVDTDLTKPYIKWDLLKYDFTEERLKLFDRYFKYWDQTYHPNCVNCLDDRCILHCANFNVLFSTVFPPTSFGPLVRKIFVDGVPFVVSTGYHFRELGVVHNQDVNLHSSRLSFKELLVYAADPAMHAASGNLLLDKRTTCFSVA…	SARS2_SARS2_Orf1ab_from_genbank; SARS2_pp1ab_nsp12
SARS2_pp1ab_nsp12	2	56	73	FQEKDEDDNLIDSYFVVK	SADAQSFLNRVCGVSAARLTPCGTGTSTDVVYRAFDIYNDKVAGFAKFLKTNCCRFQEKDEDDNLIDSYFVVKRHTFSNYQHEETIYNLLKDCPAVAKHDFFKFRIDGDMVPHISRQRLTKYTMADLVYALRHFDEGNCDTLKEILVTYNCCDDDYFNKKDWYDFVENPDILRVYANLGERVRQALLKTVQFCDAMRNAGIVGVLTLDNQDLNGNWYDFGDFIQTTPGSGVPVVDSYYSLLMPILTLTRALTAESHVDTDLTKPYIKWDLLKYDFTEERLKLFDRYFKYWDQTYHPNCVNCLDDRCILHCANFNVLFSTVFPPTSFGPLVRKIFVDGVPFVVSTGYHFRELGVVHNQDVNLHSSRLSFKELLVYAADPAMHAASGNLLLDKRTTCFSVA…	SARS2_SARS2_Orf1ab_from_genbank; SARS2_pp1ab_nsp12
SARS2_pp1ab_nsp12	1	56	74	FQEKDEDDNLIDSYFVVKR	SADAQSFLNRVCGVSAARLTPCGTGTSTDVVYRAFDIYNDKVAGFAKFLKTNCCRFQEKDEDDNLIDSYFVVKRHTFSNYQHEETIYNLLKDCPAVAKHDFFKFRIDGDMVPHISRQRLTKYTMADLVYALRHFDEGNCDTLKEILVTYNCCDDDYFNKKDWYDFVENPDILRVYANLGERVRQALLKTVQFCDAMRNAGIVGVLTLDNQDLNGNWYDFGDFIQTTPGSGVPVVDSYYSLLMPILTLTRALTAESHVDTDLTKPYIKWDLLKYDFTEERLKLFDRYFKYWDQTYHPNCVNCLDDRCILHCANFNVLFSTVFPPTSFGPLVRKIFVDGVPFVVSTGYHFRELGVVHNQDVNLHSSRLSFKELLVYAADPAMHAASGNLLLDKRTTCFSVA…	SARS2_SARS2_Orf1ab_from_genbank; SARS2_pp1ab_nsp12
SARS2_pp1ab_nsp12	5	75	91	HTFSNYQHEETIYNLLK	SADAQSFLNRVCGVSAARLTPCGTGTSTDVVYRAFDIYNDKVAGFAKFLKTNCCRFQEKDEDDNLIDSYFVVKRHTFSNYQHEETIYNLLKDCPAVAKHDFFKFRIDGDMVPHISRQRLTKYTMADLVYALRHFDEGNCDTLKEILVTYNCCDDDYFNKKDWYDFVENPDILRVYANLGERVRQALLKTVQFCDAMRNAGIVGVLTLDNQDLNGNWYDFGDFIQTTPGSGVPVVDSYYSLLMPILTLTRALTAESHVDTDLTKPYIKWDLLKYDFTEERLKLFDRYFKYWDQTYHPNCVNCLDDRCILHCANFNVLFSTVFPPTSFGPLVRKIFVDGVPFVVSTGYHFRELGVVHNQDVNLHSSRLSFKELLVYAADPAMHAASGNLLLDKRTTCFSVA…	SARS2_SARS2_Orf1ab_from_genbank; SARS2_pp1ab_nsp12
SARS2_pp1ab_nsp12	1	104	116	FRIDGDMVPHISR	SADAQSFLNRVCGVSAARLTPCGTGTSTDVVYRAFDIYNDKVAGFAKFLKTNCCRFQEKDEDDNLIDSYFVVKRHTFSNYQHEETIYNLLKDCPAVAKHDFFKFRIDGDMVPHISRQRLTKYTMADLVYALRHFDEGNCDTLKEILVTYNCCDDDYFNKKDWYDFVENPDILRVYANLGERVRQALLKTVQFCDAMRNAGIVGVLTLDNQDLNGNWYDFGDFIQTTPGSGVPVVDSYYSLLMPILTLTRALTAESHVDTDLTKPYIKWDLLKYDFTEERLKLFDRYFKYWDQTYHPNCVNCLDDRCILHCANFNVLFSTVFPPTSFGPLVRKIFVDGVPFVVSTGYHFRELGVVHNQDVNLHSSRLSFKELLVYAADPAMHAASGNLLLDKRTTCFSVA…	SARS2_SARS2_Orf1ab_from_genbank; SARS2_pp1ab_nsp12
SARS2_pp1ab_nsp12	1	106	116	IDGDMVPHISR	SADAQSFLNRVCGVSAARLTPCGTGTSTDVVYRAFDIYNDKVAGFAKFLKTNCCRFQEKDEDDNLIDSYFVVKRHTFSNYQHEETIYNLLKDCPAVAKHDFFKFRIDGDMVPHISRQRLTKYTMADLVYALRHFDEGNCDTLKEILVTYNCCDDDYFNKKDWYDFVENPDILRVYANLGERVRQALLKTVQFCDAMRNAGIVGVLTLDNQDLNGNWYDFGDFIQTTPGSGVPVVDSYYSLLMPILTLTRALTAESHVDTDLTKPYIKWDLLKYDFTEERLKLFDRYFKYWDQTYHPNCVNCLDDRCILHCANFNVLFSTVFPPTSFGPLVRKIFVDGVPFVVSTGYHFRELGVVHNQDVNLHSSRLSFKELLVYAADPAMHAASGNLLLDKRTTCFSVA…	SARS2_SARS2_Orf1ab_from_genbank; SARS2_pp1ab_nsp12
SARS2_pp1ab_nsp12	6	122	132	YTMADLVYALR	SADAQSFLNRVCGVSAARLTPCGTGTSTDVVYRAFDIYNDKVAGFAKFLKTNCCRFQEKDEDDNLIDSYFVVKRHTFSNYQHEETIYNLLKDCPAVAKHDFFKFRIDGDMVPHISRQRLTKYTMADLVYALRHFDEGNCDTLKEILVTYNCCDDDYFNKKDWYDFVENPDILRVYANLGERVRQALLKTVQFCDAMRNAGIVGVLTLDNQDLNGNWYDFGDFIQTTPGSGVPVVDSYYSLLMPILTLTRALTAESHVDTDLTKPYIKWDLLKYDFTEERLKLFDRYFKYWDQTYHPNCVNCLDDRCILHCANFNVLFSTVFPPTSFGPLVRKIFVDGVPFVVSTGYHFRELGVVHNQDVNLHSSRLSFKELLVYAADPAMHAASGNLLLDKRTTCFSVA…	SARS2_SARS2_Orf1ab_from_genbank; SARS2_pp1ab_nsp12
SARS2_pp1ab_nsp12	4	133	143	HFDEGNCDTLK	SADAQSFLNRVCGVSAARLTPCGTGTSTDVVYRAFDIYNDKVAGFAKFLKTNCCRFQEKDEDDNLIDSYFVVKRHTFSNYQHEETIYNLLKDCPAVAKHDFFKFRIDGDMVPHISRQRLTKYTMADLVYALRHFDEGNCDTLKEILVTYNCCDDDYFNKKDWYDFVENPDILRVYANLGERVRQALLKTVQFCDAMRNAGIVGVLTLDNQDLNGNWYDFGDFIQTTPGSGVPVVDSYYSLLMPILTLTRALTAESHVDTDLTKPYIKWDLLKYDFTEERLKLFDRYFKYWDQTYHPNCVNCLDDRCILHCANFNVLFSTVFPPTSFGPLVRKIFVDGVPFVVSTGYHFRELGVVHNQDVNLHSSRLSFKELLVYAADPAMHAASGNLLLDKRTTCFSVA…	mRNA#67817_1_copies:polyA_is_-1 coordinates are BetaCoV/England/02/2020; SARS2_SARS2_Orf1ab_from_genbank; SARS2_pp1ab_nsp12; mRNA#64247_1_copies:polyA_is_-1 coordinates are BetaCoV/England/02/2020; mRNA#35754_1_copies:polyA_is_-1 coordinates are BetaCoV/England/02/2020; mRNA#17791_1_copies:polyA_is_-1 coordinates are BetaCoV/England/02/2020; mRNA#32076_1_copies:polyA_is_-1 coordinates are BetaCoV…
SARS2_pp1ab_nsp12	8	161	173	DWYDFVENPDILR	SADAQSFLNRVCGVSAARLTPCGTGTSTDVVYRAFDIYNDKVAGFAKFLKTNCCRFQEKDEDDNLIDSYFVVKRHTFSNYQHEETIYNLLKDCPAVAKHDFFKFRIDGDMVPHISRQRLTKYTMADLVYALRHFDEGNCDTLKEILVTYNCCDDDYFNKKDWYDFVENPDILRVYANLGERVRQALLKTVQFCDAMRNAGIVGVLTLDNQDLNGNWYDFGDFIQTTPGSGVPVVDSYYSLLMPILTLTRALTAESHVDTDLTKPYIKWDLLKYDFTEERLKLFDRYFKYWDQTYHPNCVNCLDDRCILHCANFNVLFSTVFPPTSFGPLVRKIFVDGVPFVVSTGYHFRELGVVHNQDVNLHSSRLSFKELLVYAADPAMHAASGNLLLDKRTTCFSVA…	mRNA#67817_1_copies:polyA_is_-1 coordinates are BetaCoV/England/02/2020; SARS2_SARS2_Orf1ab_from_genbank; SARS2_pp1ab_nsp12; mRNA#64247_1_copies:polyA_is_-1 coordinates are BetaCoV/England/02/2020; mRNA#35754_1_copies:polyA_is_-1 coordinates are BetaCoV/England/02/2020; mRNA#17791_1_copies:polyA_is_-1 coordinates are BetaCoV/England/02/2020; mRNA#32076_1_copies:polyA_is_-1 coordinates are BetaCoV…
SARS2_pp1ab_nsp12	3	174	181	VYANLGER	SADAQSFLNRVCGVSAARLTPCGTGTSTDVVYRAFDIYNDKVAGFAKFLKTNCCRFQEKDEDDNLIDSYFVVKRHTFSNYQHEETIYNLLKDCPAVAKHDFFKFRIDGDMVPHISRQRLTKYTMADLVYALRHFDEGNCDTLKEILVTYNCCDDDYFNKKDWYDFVENPDILRVYANLGERVRQALLKTVQFCDAMRNAGIVGVLTLDNQDLNGNWYDFGDFIQTTPGSGVPVVDSYYSLLMPILTLTRALTAESHVDTDLTKPYIKWDLLKYDFTEERLKLFDRYFKYWDQTYHPNCVNCLDDRCILHCANFNVLFSTVFPPTSFGPLVRKIFVDGVPFVVSTGYHFRELGVVHNQDVNLHSSRLSFKELLVYAADPAMHAASGNLLLDKRTTCFSVA…	mRNA#67817_1_copies:polyA_is_-1 coordinates are BetaCoV/England/02/2020; SARS2_SARS2_Orf1ab_from_genbank; SARS2_pp1ab_nsp12; mRNA#64247_1_copies:polyA_is_-1 coordinates are BetaCoV/England/02/2020; mRNA#35754_1_copies:polyA_is_-1 coordinates are BetaCoV/England/02/2020; mRNA#17791_1_copies:polyA_is_-1 coordinates are BetaCoV/England/02/2020; mRNA#32076_1_copies:polyA_is_-1 coordinates are BetaCoV…
SARS2_pp1ab_nsp12	3	189	197	TVQFCDAMR	SADAQSFLNRVCGVSAARLTPCGTGTSTDVVYRAFDIYNDKVAGFAKFLKTNCCRFQEKDEDDNLIDSYFVVKRHTFSNYQHEETIYNLLKDCPAVAKHDFFKFRIDGDMVPHISRQRLTKYTMADLVYALRHFDEGNCDTLKEILVTYNCCDDDYFNKKDWYDFVENPDILRVYANLGERVRQALLKTVQFCDAMRNAGIVGVLTLDNQDLNGNWYDFGDFIQTTPGSGVPVVDSYYSLLMPILTLTRALTAESHVDTDLTKPYIKWDLLKYDFTEERLKLFDRYFKYWDQTYHPNCVNCLDDRCILHCANFNVLFSTVFPPTSFGPLVRKIFVDGVPFVVSTGYHFRELGVVHNQDVNLHSSRLSFKELLVYAADPAMHAASGNLLLDKRTTCFSVA…	mRNA#67817_1_copies:polyA_is_-1 coordinates are BetaCoV/England/02/2020; SARS2_SARS2_Orf1ab_from_genbank; SARS2_pp1ab_nsp12; mRNA#64247_1_copies:polyA_is_-1 coordinates are BetaCoV/England/02/2020; mRNA#35754_1_copies:polyA_is_-1 coordinates are BetaCoV/England/02/2020; mRNA#17791_1_copies:polyA_is_-1 coordinates are BetaCoV/England/02/2020; mRNA#32076_1_copies:polyA_is_-1 coordinates are BetaCoV…
SARS2_pp1ab_nsp12	4	250	267	ALTAESHVDTDLTKPYIK	SADAQSFLNRVCGVSAARLTPCGTGTSTDVVYRAFDIYNDKVAGFAKFLKTNCCRFQEKDEDDNLIDSYFVVKRHTFSNYQHEETIYNLLKDCPAVAKHDFFKFRIDGDMVPHISRQRLTKYTMADLVYALRHFDEGNCDTLKEILVTYNCCDDDYFNKKDWYDFVENPDILRVYANLGERVRQALLKTVQFCDAMRNAGIVGVLTLDNQDLNGNWYDFGDFIQTTPGSGVPVVDSYYSLLMPILTLTRALTAESHVDTDLTKPYIKWDLLKYDFTEERLKLFDRYFKYWDQTYHPNCVNCLDDRCILHCANFNVLFSTVFPPTSFGPLVRKIFVDGVPFVVSTGYHFRELGVVHNQDVNLHSSRLSFKELLVYAADPAMHAASGNLLLDKRTTCFSVA…	mRNA#11160_1_copies:polyA_is_-1 coordinates are BetaCoV/England/02/2020; mRNA#65745_1_copies:polyA_is_-1 coordinates are BetaCoV/England/02/2020; mRNA#12838_1_copies:polyA_is_-1 coordinates are BetaCoV/England/02/2020; mRNA#73669_1_copies:polyA_is_-1 coordinates are BetaCoV/England/02/2020; mRNA#67817_1_copies:polyA_is_-1 coordinates are BetaCoV/England/02/2020; mRNA#73116_1_copies:polyA_is_-1 co…
SARS2_pp1ab_nsp12	5	273	279	YDFTEER	SADAQSFLNRVCGVSAARLTPCGTGTSTDVVYRAFDIYNDKVAGFAKFLKTNCCRFQEKDEDDNLIDSYFVVKRHTFSNYQHEETIYNLLKDCPAVAKHDFFKFRIDGDMVPHISRQRLTKYTMADLVYALRHFDEGNCDTLKEILVTYNCCDDDYFNKKDWYDFVENPDILRVYANLGERVRQALLKTVQFCDAMRNAGIVGVLTLDNQDLNGNWYDFGDFIQTTPGSGVPVVDSYYSLLMPILTLTRALTAESHVDTDLTKPYIKWDLLKYDFTEERLKLFDRYFKYWDQTYHPNCVNCLDDRCILHCANFNVLFSTVFPPTSFGPLVRKIFVDGVPFVVSTGYHFRELGVVHNQDVNLHSSRLSFKELLVYAADPAMHAASGNLLLDKRTTCFSVA…	mRNA#11160_1_copies:polyA_is_-1 coordinates are BetaCoV/England/02/2020; mRNA#65745_1_copies:polyA_is_-1 coordinates are BetaCoV/England/02/2020; mRNA#12838_1_copies:polyA_is_-1 coordinates are BetaCoV/England/02/2020; mRNA#73669_1_copies:polyA_is_-1 coordinates are BetaCoV/England/02/2020; mRNA#67817_1_copies:polyA_is_-1 coordinates are BetaCoV/England/02/2020; mRNA#73116_1_copies:polyA_is_-1 co…
SARS2_pp1ab_nsp12	1	289	305	YWDQTYHPNCVNCLDDR	SADAQSFLNRVCGVSAARLTPCGTGTSTDVVYRAFDIYNDKVAGFAKFLKTNCCRFQEKDEDDNLIDSYFVVKRHTFSNYQHEETIYNLLKDCPAVAKHDFFKFRIDGDMVPHISRQRLTKYTMADLVYALRHFDEGNCDTLKEILVTYNCCDDDYFNKKDWYDFVENPDILRVYANLGERVRQALLKTVQFCDAMRNAGIVGVLTLDNQDLNGNWYDFGDFIQTTPGSGVPVVDSYYSLLMPILTLTRALTAESHVDTDLTKPYIKWDLLKYDFTEERLKLFDRYFKYWDQTYHPNCVNCLDDRCILHCANFNVLFSTVFPPTSFGPLVRKIFVDGVPFVVSTGYHFRELGVVHNQDVNLHSSRLSFKELLVYAADPAMHAASGNLLLDKRTTCFSVA…	mRNA#11160_1_copies:polyA_is_-1 coordinates are BetaCoV/England/02/2020; mRNA#65745_1_copies:polyA_is_-1 coordinates are BetaCoV/England/02/2020; mRNA#12838_1_copies:polyA_is_-1 coordinates are BetaCoV/England/02/2020; mRNA#73669_1_copies:polyA_is_-1 coordinates are BetaCoV/England/02/2020; mRNA#67817_1_copies:polyA_is_-1 coordinates are BetaCoV/England/02/2020; mRNA#73116_1_copies:polyA_is_-1 co…
SARS2_pp1ab_nsp12	7	333	349	IFVDGVPFVVSTGYHFR	SADAQSFLNRVCGVSAARLTPCGTGTSTDVVYRAFDIYNDKVAGFAKFLKTNCCRFQEKDEDDNLIDSYFVVKRHTFSNYQHEETIYNLLKDCPAVAKHDFFKFRIDGDMVPHISRQRLTKYTMADLVYALRHFDEGNCDTLKEILVTYNCCDDDYFNKKDWYDFVENPDILRVYANLGERVRQALLKTVQFCDAMRNAGIVGVLTLDNQDLNGNWYDFGDFIQTTPGSGVPVVDSYYSLLMPILTLTRALTAESHVDTDLTKPYIKWDLLKYDFTEERLKLFDRYFKYWDQTYHPNCVNCLDDRCILHCANFNVLFSTVFPPTSFGPLVRKIFVDGVPFVVSTGYHFRELGVVHNQDVNLHSSRLSFKELLVYAADPAMHAASGNLLLDKRTTCFSVA…	mRNA#11160_1_copies:polyA_is_-1 coordinates are BetaCoV/England/02/2020; mRNA#65745_1_copies:polyA_is_-1 coordinates are BetaCoV/England/02/2020; mRNA#12838_1_copies:polyA_is_-1 coordinates are BetaCoV/England/02/2020; mRNA#73669_1_copies:polyA_is_-1 coordinates are BetaCoV/England/02/2020; mRNA#67817_1_copies:polyA_is_-1 coordinates are BetaCoV/England/02/2020; mRNA#73116_1_copies:polyA_is_-1 co…
SARS2_pp1ab_nsp12	9	350	365	ELGVVHNQDVNLHSSR	SADAQSFLNRVCGVSAARLTPCGTGTSTDVVYRAFDIYNDKVAGFAKFLKTNCCRFQEKDEDDNLIDSYFVVKRHTFSNYQHEETIYNLLKDCPAVAKHDFFKFRIDGDMVPHISRQRLTKYTMADLVYALRHFDEGNCDTLKEILVTYNCCDDDYFNKKDWYDFVENPDILRVYANLGERVRQALLKTVQFCDAMRNAGIVGVLTLDNQDLNGNWYDFGDFIQTTPGSGVPVVDSYYSLLMPILTLTRALTAESHVDTDLTKPYIKWDLLKYDFTEERLKLFDRYFKYWDQTYHPNCVNCLDDRCILHCANFNVLFSTVFPPTSFGPLVRKIFVDGVPFVVSTGYHFRELGVVHNQDVNLHSSRLSFKELLVYAADPAMHAASGNLLLDKRTTCFSVA…	mRNA#11160_1_copies:polyA_is_-1 coordinates are BetaCoV/England/02/2020; mRNA#65745_1_copies:polyA_is_-1 coordinates are BetaCoV/England/02/2020; mRNA#12838_1_copies:polyA_is_-1 coordinates are BetaCoV/England/02/2020; mRNA#73669_1_copies:polyA_is_-1 coordinates are BetaCoV/England/02/2020; mRNA#67817_1_copies:polyA_is_-1 coordinates are BetaCoV/England/02/2020; mRNA#73116_1_copies:polyA_is_-1 co…
SARS2_pp1ab_nsp12	1	370	391	ELLVYAADPAMHAASGNLLLDK	SADAQSFLNRVCGVSAARLTPCGTGTSTDVVYRAFDIYNDKVAGFAKFLKTNCCRFQEKDEDDNLIDSYFVVKRHTFSNYQHEETIYNLLKDCPAVAKHDFFKFRIDGDMVPHISRQRLTKYTMADLVYALRHFDEGNCDTLKEILVTYNCCDDDYFNKKDWYDFVENPDILRVYANLGERVRQALLKTVQFCDAMRNAGIVGVLTLDNQDLNGNWYDFGDFIQTTPGSGVPVVDSYYSLLMPILTLTRALTAESHVDTDLTKPYIKWDLLKYDFTEERLKLFDRYFKYWDQTYHPNCVNCLDDRCILHCANFNVLFSTVFPPTSFGPLVRKIFVDGVPFVVSTGYHFRELGVVHNQDVNLHSSRLSFKELLVYAADPAMHAASGNLLLDKRTTCFSVA…	mRNA#11160_1_copies:polyA_is_-1 coordinates are BetaCoV/England/02/2020; mRNA#65745_1_copies:polyA_is_-1 coordinates are BetaCoV/England/02/2020; mRNA#12838_1_copies:polyA_is_-1 coordinates are BetaCoV/England/02/2020; mRNA#73669_1_copies:polyA_is_-1 coordinates are BetaCoV/England/02/2020; mRNA#67817_1_copies:polyA_is_-1 coordinates are BetaCoV/England/02/2020; mRNA#73116_1_copies:polyA_is_-1 co…
SARS2_pp1ab_nsp12	2	393	417	TTCFSVAALTNNVAFQTVKPGNFNK	SADAQSFLNRVCGVSAARLTPCGTGTSTDVVYRAFDIYNDKVAGFAKFLKTNCCRFQEKDEDDNLIDSYFVVKRHTFSNYQHEETIYNLLKDCPAVAKHDFFKFRIDGDMVPHISRQRLTKYTMADLVYALRHFDEGNCDTLKEILVTYNCCDDDYFNKKDWYDFVENPDILRVYANLGERVRQALLKTVQFCDAMRNAGIVGVLTLDNQDLNGNWYDFGDFIQTTPGSGVPVVDSYYSLLMPILTLTRALTAESHVDTDLTKPYIKWDLLKYDFTEERLKLFDRYFKYWDQTYHPNCVNCLDDRCILHCANFNVLFSTVFPPTSFGPLVRKIFVDGVPFVVSTGYHFRELGVVHNQDVNLHSSRLSFKELLVYAADPAMHAASGNLLLDKRTTCFSVA…	mRNA#11160_1_copies:polyA_is_-1 coordinates are BetaCoV/England/02/2020; mRNA#65745_1_copies:polyA_is_-1 coordinates are BetaCoV/England/02/2020; mRNA#12838_1_copies:polyA_is_-1 coordinates are BetaCoV/England/02/2020; mRNA#73669_1_copies:polyA_is_-1 coordinates are BetaCoV/England/02/2020; mRNA#67817_1_copies:polyA_is_-1 coordinates are BetaCoV/England/02/2020; mRNA#73116_1_copies:polyA_is_-1 co…
SARS2_pp1ab_nsp12	4	418	426	DFYDFAVSK	SADAQSFLNRVCGVSAARLTPCGTGTSTDVVYRAFDIYNDKVAGFAKFLKTNCCRFQEKDEDDNLIDSYFVVKRHTFSNYQHEETIYNLLKDCPAVAKHDFFKFRIDGDMVPHISRQRLTKYTMADLVYALRHFDEGNCDTLKEILVTYNCCDDDYFNKKDWYDFVENPDILRVYANLGERVRQALLKTVQFCDAMRNAGIVGVLTLDNQDLNGNWYDFGDFIQTTPGSGVPVVDSYYSLLMPILTLTRALTAESHVDTDLTKPYIKWDLLKYDFTEERLKLFDRYFKYWDQTYHPNCVNCLDDRCILHCANFNVLFSTVFPPTSFGPLVRKIFVDGVPFVVSTGYHFRELGVVHNQDVNLHSSRLSFKELLVYAADPAMHAASGNLLLDKRTTCFSVA…	mRNA#11160_1_copies:polyA_is_-1 coordinates are BetaCoV/England/02/2020; mRNA#65745_1_copies:polyA_is_-1 coordinates are BetaCoV/England/02/2020; mRNA#12838_1_copies:polyA_is_-1 coordinates are BetaCoV/England/02/2020; mRNA#73669_1_copies:polyA_is_-1 coordinates are BetaCoV/England/02/2020; mRNA#67817_1_copies:polyA_is_-1 coordinates are BetaCoV/England/02/2020; mRNA#73116_1_copies:polyA_is_-1 co…
SARS2_pp1ab_nsp12	3	431	438	EGSSVELK	SADAQSFLNRVCGVSAARLTPCGTGTSTDVVYRAFDIYNDKVAGFAKFLKTNCCRFQEKDEDDNLIDSYFVVKRHTFSNYQHEETIYNLLKDCPAVAKHDFFKFRIDGDMVPHISRQRLTKYTMADLVYALRHFDEGNCDTLKEILVTYNCCDDDYFNKKDWYDFVENPDILRVYANLGERVRQALLKTVQFCDAMRNAGIVGVLTLDNQDLNGNWYDFGDFIQTTPGSGVPVVDSYYSLLMPILTLTRALTAESHVDTDLTKPYIKWDLLKYDFTEERLKLFDRYFKYWDQTYHPNCVNCLDDRCILHCANFNVLFSTVFPPTSFGPLVRKIFVDGVPFVVSTGYHFRELGVVHNQDVNLHSSRLSFKELLVYAADPAMHAASGNLLLDKRTTCFSVA…	mRNA#11160_1_copies:polyA_is_-1 coordinates are BetaCoV/England/02/2020; mRNA#65745_1_copies:polyA_is_-1 coordinates are BetaCoV/England/02/2020; mRNA#12838_1_copies:polyA_is_-1 coordinates are BetaCoV/England/02/2020; mRNA#73669_1_copies:polyA_is_-1 coordinates are BetaCoV/England/02/2020; mRNA#67817_1_copies:polyA_is_-1 coordinates are BetaCoV/England/02/2020; mRNA#73116_1_copies:polyA_is_-1 co…
SARS2_pp1ab_nsp12	2	439	457	HFFFAQDGNAAISDYDYYR	SADAQSFLNRVCGVSAARLTPCGTGTSTDVVYRAFDIYNDKVAGFAKFLKTNCCRFQEKDEDDNLIDSYFVVKRHTFSNYQHEETIYNLLKDCPAVAKHDFFKFRIDGDMVPHISRQRLTKYTMADLVYALRHFDEGNCDTLKEILVTYNCCDDDYFNKKDWYDFVENPDILRVYANLGERVRQALLKTVQFCDAMRNAGIVGVLTLDNQDLNGNWYDFGDFIQTTPGSGVPVVDSYYSLLMPILTLTRALTAESHVDTDLTKPYIKWDLLKYDFTEERLKLFDRYFKYWDQTYHPNCVNCLDDRCILHCANFNVLFSTVFPPTSFGPLVRKIFVDGVPFVVSTGYHFRELGVVHNQDVNLHSSRLSFKELLVYAADPAMHAASGNLLLDKRTTCFSVA…	mRNA#11160_1_copies:polyA_is_-1 coordinates are BetaCoV/England/02/2020; mRNA#12838_1_copies:polyA_is_-1 coordinates are BetaCoV/England/02/2020; mRNA#73669_1_copies:polyA_is_-1 coordinates are BetaCoV/England/02/2020; mRNA#67817_1_copies:polyA_is_-1 coordinates are BetaCoV/England/02/2020; mRNA#73116_1_copies:polyA_is_-1 coordinates are BetaCoV/England/02/2020; SARS2_SARS2_Orf1ab_from_genbank; m…
SARS2_pp1ab_nsp12	3	458	467	YNLPTMCDIR	SADAQSFLNRVCGVSAARLTPCGTGTSTDVVYRAFDIYNDKVAGFAKFLKTNCCRFQEKDEDDNLIDSYFVVKRHTFSNYQHEETIYNLLKDCPAVAKHDFFKFRIDGDMVPHISRQRLTKYTMADLVYALRHFDEGNCDTLKEILVTYNCCDDDYFNKKDWYDFVENPDILRVYANLGERVRQALLKTVQFCDAMRNAGIVGVLTLDNQDLNGNWYDFGDFIQTTPGSGVPVVDSYYSLLMPILTLTRALTAESHVDTDLTKPYIKWDLLKYDFTEERLKLFDRYFKYWDQTYHPNCVNCLDDRCILHCANFNVLFSTVFPPTSFGPLVRKIFVDGVPFVVSTGYHFRELGVVHNQDVNLHSSRLSFKELLVYAADPAMHAASGNLLLDKRTTCFSVA…	mRNA#11160_1_copies:polyA_is_-1 coordinates are BetaCoV/England/02/2020; mRNA#12838_1_copies:polyA_is_-1 coordinates are BetaCoV/England/02/2020; mRNA#73669_1_copies:polyA_is_-1 coordinates are BetaCoV/England/02/2020; mRNA#67817_1_copies:polyA_is_-1 coordinates are BetaCoV/England/02/2020; mRNA#73116_1_copies:polyA_is_-1 coordinates are BetaCoV/England/02/2020; SARS2_SARS2_Orf1ab_from_genbank; m…
SARS2_pp1ab_nsp12	6	501	508	SAGFPFNK	SADAQSFLNRVCGVSAARLTPCGTGTSTDVVYRAFDIYNDKVAGFAKFLKTNCCRFQEKDEDDNLIDSYFVVKRHTFSNYQHEETIYNLLKDCPAVAKHDFFKFRIDGDMVPHISRQRLTKYTMADLVYALRHFDEGNCDTLKEILVTYNCCDDDYFNKKDWYDFVENPDILRVYANLGERVRQALLKTVQFCDAMRNAGIVGVLTLDNQDLNGNWYDFGDFIQTTPGSGVPVVDSYYSLLMPILTLTRALTAESHVDTDLTKPYIKWDLLKYDFTEERLKLFDRYFKYWDQTYHPNCVNCLDDRCILHCANFNVLFSTVFPPTSFGPLVRKIFVDGVPFVVSTGYHFRELGVVHNQDVNLHSSRLSFKELLVYAADPAMHAASGNLLLDKRTTCFSVA…	mRNA#11160_1_copies:polyA_is_-1 coordinates are BetaCoV/England/02/2020; mRNA#12838_1_copies:polyA_is_-1 coordinates are BetaCoV/England/02/2020; mRNA#73669_1_copies:polyA_is_-1 coordinates are BetaCoV/England/02/2020; mRNA#67817_1_copies:polyA_is_-1 coordinates are BetaCoV/England/02/2020; mRNA#73116_1_copies:polyA_is_-1 coordinates are BetaCoV/England/02/2020; SARS2_SARS2_Orf1ab_from_genbank; m…
SARS2_pp1ab_nsp12	8	534	545	NVIPTITQMNLK	SADAQSFLNRVCGVSAARLTPCGTGTSTDVVYRAFDIYNDKVAGFAKFLKTNCCRFQEKDEDDNLIDSYFVVKRHTFSNYQHEETIYNLLKDCPAVAKHDFFKFRIDGDMVPHISRQRLTKYTMADLVYALRHFDEGNCDTLKEILVTYNCCDDDYFNKKDWYDFVENPDILRVYANLGERVRQALLKTVQFCDAMRNAGIVGVLTLDNQDLNGNWYDFGDFIQTTPGSGVPVVDSYYSLLMPILTLTRALTAESHVDTDLTKPYIKWDLLKYDFTEERLKLFDRYFKYWDQTYHPNCVNCLDDRCILHCANFNVLFSTVFPPTSFGPLVRKIFVDGVPFVVSTGYHFRELGVVHNQDVNLHSSRLSFKELLVYAADPAMHAASGNLLLDKRTTCFSVA…	mRNA#11160_1_copies:polyA_is_-1 coordinates are BetaCoV/England/02/2020; mRNA#12838_1_copies:polyA_is_-1 coordinates are BetaCoV/England/02/2020; mRNA#73669_1_copies:polyA_is_-1 coordinates are BetaCoV/England/02/2020; mRNA#67817_1_copies:polyA_is_-1 coordinates are BetaCoV/England/02/2020; mRNA#73116_1_copies:polyA_is_-1 coordinates are BetaCoV/England/02/2020; SARS2_SARS2_Orf1ab_from_genbank; m…
SARS2_pp1ab_nsp12	4	556	569	TVAGVSICSTMTNR	SADAQSFLNRVCGVSAARLTPCGTGTSTDVVYRAFDIYNDKVAGFAKFLKTNCCRFQEKDEDDNLIDSYFVVKRHTFSNYQHEETIYNLLKDCPAVAKHDFFKFRIDGDMVPHISRQRLTKYTMADLVYALRHFDEGNCDTLKEILVTYNCCDDDYFNKKDWYDFVENPDILRVYANLGERVRQALLKTVQFCDAMRNAGIVGVLTLDNQDLNGNWYDFGDFIQTTPGSGVPVVDSYYSLLMPILTLTRALTAESHVDTDLTKPYIKWDLLKYDFTEERLKLFDRYFKYWDQTYHPNCVNCLDDRCILHCANFNVLFSTVFPPTSFGPLVRKIFVDGVPFVVSTGYHFRELGVVHNQDVNLHSSRLSFKELLVYAADPAMHAASGNLLLDKRTTCFSVA…	mRNA#11160_1_copies:polyA_is_-1 coordinates are BetaCoV/England/02/2020; mRNA#12838_1_copies:polyA_is_-1 coordinates are BetaCoV/England/02/2020; mRNA#73669_1_copies:polyA_is_-1 coordinates are BetaCoV/England/02/2020; mRNA#67817_1_copies:polyA_is_-1 coordinates are BetaCoV/England/02/2020; mRNA#73116_1_copies:polyA_is_-1 coordinates are BetaCoV/England/02/2020; SARS2_SARS2_Orf1ab_from_genbank; m…
SARS2_pp1ab_nsp12	3	594	603	FYGGWHNMLK	SADAQSFLNRVCGVSAARLTPCGTGTSTDVVYRAFDIYNDKVAGFAKFLKTNCCRFQEKDEDDNLIDSYFVVKRHTFSNYQHEETIYNLLKDCPAVAKHDFFKFRIDGDMVPHISRQRLTKYTMADLVYALRHFDEGNCDTLKEILVTYNCCDDDYFNKKDWYDFVENPDILRVYANLGERVRQALLKTVQFCDAMRNAGIVGVLTLDNQDLNGNWYDFGDFIQTTPGSGVPVVDSYYSLLMPILTLTRALTAESHVDTDLTKPYIKWDLLKYDFTEERLKLFDRYFKYWDQTYHPNCVNCLDDRCILHCANFNVLFSTVFPPTSFGPLVRKIFVDGVPFVVSTGYHFRELGVVHNQDVNLHSSRLSFKELLVYAADPAMHAASGNLLLDKRTTCFSVA…	mRNA#11160_1_copies:polyA_is_-1 coordinates are BetaCoV/England/02/2020; mRNA#54838_1_copies:polyA_is_-1 coordinates are BetaCoV/England/02/2020; mRNA#12838_1_copies:polyA_is_-1 coordinates are BetaCoV/England/02/2020; mRNA#73669_1_copies:polyA_is_-1 coordinates are BetaCoV/England/02/2020; mRNA#67817_1_copies:polyA_is_-1 coordinates are BetaCoV/England/02/2020; mRNA#44350_1_copies:polyA_is_-1 co…
SARS2_pp1ab_nsp12	3	604	621	TVYSDVENPHLMGWDYPK	SADAQSFLNRVCGVSAARLTPCGTGTSTDVVYRAFDIYNDKVAGFAKFLKTNCCRFQEKDEDDNLIDSYFVVKRHTFSNYQHEETIYNLLKDCPAVAKHDFFKFRIDGDMVPHISRQRLTKYTMADLVYALRHFDEGNCDTLKEILVTYNCCDDDYFNKKDWYDFVENPDILRVYANLGERVRQALLKTVQFCDAMRNAGIVGVLTLDNQDLNGNWYDFGDFIQTTPGSGVPVVDSYYSLLMPILTLTRALTAESHVDTDLTKPYIKWDLLKYDFTEERLKLFDRYFKYWDQTYHPNCVNCLDDRCILHCANFNVLFSTVFPPTSFGPLVRKIFVDGVPFVVSTGYHFRELGVVHNQDVNLHSSRLSFKELLVYAADPAMHAASGNLLLDKRTTCFSVA…	mRNA#11160_1_copies:polyA_is_-1 coordinates are BetaCoV/England/02/2020; mRNA#54838_1_copies:polyA_is_-1 coordinates are BetaCoV/England/02/2020; mRNA#12838_1_copies:polyA_is_-1 coordinates are BetaCoV/England/02/2020; mRNA#73669_1_copies:polyA_is_-1 coordinates are BetaCoV/England/02/2020; mRNA#67817_1_copies:polyA_is_-1 coordinates are BetaCoV/England/02/2020; mRNA#44350_1_copies:polyA_is_-1 co…
SARS2_pp1ab_nsp12	4	632	640	IMASLVLAR	SADAQSFLNRVCGVSAARLTPCGTGTSTDVVYRAFDIYNDKVAGFAKFLKTNCCRFQEKDEDDNLIDSYFVVKRHTFSNYQHEETIYNLLKDCPAVAKHDFFKFRIDGDMVPHISRQRLTKYTMADLVYALRHFDEGNCDTLKEILVTYNCCDDDYFNKKDWYDFVENPDILRVYANLGERVRQALLKTVQFCDAMRNAGIVGVLTLDNQDLNGNWYDFGDFIQTTPGSGVPVVDSYYSLLMPILTLTRALTAESHVDTDLTKPYIKWDLLKYDFTEERLKLFDRYFKYWDQTYHPNCVNCLDDRCILHCANFNVLFSTVFPPTSFGPLVRKIFVDGVPFVVSTGYHFRELGVVHNQDVNLHSSRLSFKELLVYAADPAMHAASGNLLLDKRTTCFSVA…	mRNA#11160_1_copies:polyA_is_-1 coordinates are BetaCoV/England/02/2020; mRNA#54838_1_copies:polyA_is_-1 coordinates are BetaCoV/England/02/2020; mRNA#12838_1_copies:polyA_is_-1 coordinates are BetaCoV/England/02/2020; mRNA#73669_1_copies:polyA_is_-1 coordinates are BetaCoV/England/02/2020; mRNA#67817_1_copies:polyA_is_-1 coordinates are BetaCoV/England/02/2020; mRNA#44350_1_copies:polyA_is_-1 co…
SARS2_pp1ab_nsp12	2	736	750	DVDTDFVNEFYAYLR	SADAQSFLNRVCGVSAARLTPCGTGTSTDVVYRAFDIYNDKVAGFAKFLKTNCCRFQEKDEDDNLIDSYFVVKRHTFSNYQHEETIYNLLKDCPAVAKHDFFKFRIDGDMVPHISRQRLTKYTMADLVYALRHFDEGNCDTLKEILVTYNCCDDDYFNKKDWYDFVENPDILRVYANLGERVRQALLKTVQFCDAMRNAGIVGVLTLDNQDLNGNWYDFGDFIQTTPGSGVPVVDSYYSLLMPILTLTRALTAESHVDTDLTKPYIKWDLLKYDFTEERLKLFDRYFKYWDQTYHPNCVNCLDDRCILHCANFNVLFSTVFPPTSFGPLVRKIFVDGVPFVVSTGYHFRELGVVHNQDVNLHSSRLSFKELLVYAADPAMHAASGNLLLDKRTTCFSVA…	mRNA#11160_1_copies:polyA_is_-1 coordinates are BetaCoV/England/02/2020; mRNA#11933_1_copies:polyA_is_-1 coordinates are BetaCoV/England/02/2020; mRNA#42313_1_copies:polyA_is_-1 coordinates are BetaCoV/England/02/2020; mRNA#54838_1_copies:polyA_is_-1 coordinates are BetaCoV/England/02/2020; mRNA#34509_1_copies:polyA_is_-1 coordinates are BetaCoV/England/02/2020; mRNA#12838_1_copies:polyA_is_-1 co…
SARS2_pp1ab_nsp12	8	784	798	SVLYYQNNVFMSEAK	SADAQSFLNRVCGVSAARLTPCGTGTSTDVVYRAFDIYNDKVAGFAKFLKTNCCRFQEKDEDDNLIDSYFVVKRHTFSNYQHEETIYNLLKDCPAVAKHDFFKFRIDGDMVPHISRQRLTKYTMADLVYALRHFDEGNCDTLKEILVTYNCCDDDYFNKKDWYDFVENPDILRVYANLGERVRQALLKTVQFCDAMRNAGIVGVLTLDNQDLNGNWYDFGDFIQTTPGSGVPVVDSYYSLLMPILTLTRALTAESHVDTDLTKPYIKWDLLKYDFTEERLKLFDRYFKYWDQTYHPNCVNCLDDRCILHCANFNVLFSTVFPPTSFGPLVRKIFVDGVPFVVSTGYHFRELGVVHNQDVNLHSSRLSFKELLVYAADPAMHAASGNLLLDKRTTCFSVA…	mRNA#11160_1_copies:polyA_is_-1 coordinates are BetaCoV/England/02/2020; mRNA#11933_1_copies:polyA_is_-1 coordinates are BetaCoV/England/02/2020; mRNA#42313_1_copies:polyA_is_-1 coordinates are BetaCoV/England/02/2020; mRNA#54838_1_copies:polyA_is_-1 coordinates are BetaCoV/England/02/2020; mRNA#34509_1_copies:polyA_is_-1 coordinates are BetaCoV/England/02/2020; mRNA#12838_1_copies:polyA_is_-1 co…
SARS2_pp1ab_nsp12	1	808	821	GPHEFCSQHTMLVK	SADAQSFLNRVCGVSAARLTPCGTGTSTDVVYRAFDIYNDKVAGFAKFLKTNCCRFQEKDEDDNLIDSYFVVKRHTFSNYQHEETIYNLLKDCPAVAKHDFFKFRIDGDMVPHISRQRLTKYTMADLVYALRHFDEGNCDTLKEILVTYNCCDDDYFNKKDWYDFVENPDILRVYANLGERVRQALLKTVQFCDAMRNAGIVGVLTLDNQDLNGNWYDFGDFIQTTPGSGVPVVDSYYSLLMPILTLTRALTAESHVDTDLTKPYIKWDLLKYDFTEERLKLFDRYFKYWDQTYHPNCVNCLDDRCILHCANFNVLFSTVFPPTSFGPLVRKIFVDGVPFVVSTGYHFRELGVVHNQDVNLHSSRLSFKELLVYAADPAMHAASGNLLLDKRTTCFSVA…	mRNA#11160_1_copies:polyA_is_-1 coordinates are BetaCoV/England/02/2020; mRNA#11933_1_copies:polyA_is_-1 coordinates are BetaCoV/England/02/2020; mRNA#23898_1_copies:polyA_is_-1 coordinates are BetaCoV/England/02/2020; mRNA#69581_1_copies:polyA_is_-1 coordinates are BetaCoV/England/02/2020; mRNA#42313_1_copies:polyA_is_-1 coordinates are BetaCoV/England/02/2020; mRNA#23741_1_copies:polyA_is_-1 co…
SARS2_pp1ab_nsp12	8	822	836	QGDDYVYLPYPDPSR	SADAQSFLNRVCGVSAARLTPCGTGTSTDVVYRAFDIYNDKVAGFAKFLKTNCCRFQEKDEDDNLIDSYFVVKRHTFSNYQHEETIYNLLKDCPAVAKHDFFKFRIDGDMVPHISRQRLTKYTMADLVYALRHFDEGNCDTLKEILVTYNCCDDDYFNKKDWYDFVENPDILRVYANLGERVRQALLKTVQFCDAMRNAGIVGVLTLDNQDLNGNWYDFGDFIQTTPGSGVPVVDSYYSLLMPILTLTRALTAESHVDTDLTKPYIKWDLLKYDFTEERLKLFDRYFKYWDQTYHPNCVNCLDDRCILHCANFNVLFSTVFPPTSFGPLVRKIFVDGVPFVVSTGYHFRELGVVHNQDVNLHSSRLSFKELLVYAADPAMHAASGNLLLDKRTTCFSVA…	mRNA#11160_1_copies:polyA_is_-1 coordinates are BetaCoV/England/02/2020; mRNA#11933_1_copies:polyA_is_-1 coordinates are BetaCoV/England/02/2020; mRNA#23898_1_copies:polyA_is_-1 coordinates are BetaCoV/England/02/2020; mRNA#69581_1_copies:polyA_is_-1 coordinates are BetaCoV/England/02/2020; mRNA#42313_1_copies:polyA_is_-1 coordinates are BetaCoV/England/02/2020; mRNA#23741_1_copies:polyA_is_-1 co…
SARS2_pp1ab_nsp12	7	837	849	ILGAGCFVDDIVK	SADAQSFLNRVCGVSAARLTPCGTGTSTDVVYRAFDIYNDKVAGFAKFLKTNCCRFQEKDEDDNLIDSYFVVKRHTFSNYQHEETIYNLLKDCPAVAKHDFFKFRIDGDMVPHISRQRLTKYTMADLVYALRHFDEGNCDTLKEILVTYNCCDDDYFNKKDWYDFVENPDILRVYANLGERVRQALLKTVQFCDAMRNAGIVGVLTLDNQDLNGNWYDFGDFIQTTPGSGVPVVDSYYSLLMPILTLTRALTAESHVDTDLTKPYIKWDLLKYDFTEERLKLFDRYFKYWDQTYHPNCVNCLDDRCILHCANFNVLFSTVFPPTSFGPLVRKIFVDGVPFVVSTGYHFRELGVVHNQDVNLHSSRLSFKELLVYAADPAMHAASGNLLLDKRTTCFSVA…	mRNA#11160_1_copies:polyA_is_-1 coordinates are BetaCoV/England/02/2020; mRNA#11933_1_copies:polyA_is_-1 coordinates are BetaCoV/England/02/2020; mRNA#23898_1_copies:polyA_is_-1 coordinates are BetaCoV/England/02/2020; mRNA#69581_1_copies:polyA_is_-1 coordinates are BetaCoV/England/02/2020; mRNA#42313_1_copies:polyA_is_-1 coordinates are BetaCoV/England/02/2020; mRNA#23741_1_copies:polyA_is_-1 co…
SARS2_pp1ab_nsp12	3	850	858	TDGTLMIER	SADAQSFLNRVCGVSAARLTPCGTGTSTDVVYRAFDIYNDKVAGFAKFLKTNCCRFQEKDEDDNLIDSYFVVKRHTFSNYQHEETIYNLLKDCPAVAKHDFFKFRIDGDMVPHISRQRLTKYTMADLVYALRHFDEGNCDTLKEILVTYNCCDDDYFNKKDWYDFVENPDILRVYANLGERVRQALLKTVQFCDAMRNAGIVGVLTLDNQDLNGNWYDFGDFIQTTPGSGVPVVDSYYSLLMPILTLTRALTAESHVDTDLTKPYIKWDLLKYDFTEERLKLFDRYFKYWDQTYHPNCVNCLDDRCILHCANFNVLFSTVFPPTSFGPLVRKIFVDGVPFVVSTGYHFRELGVVHNQDVNLHSSRLSFKELLVYAADPAMHAASGNLLLDKRTTCFSVA…	mRNA#11160_1_copies:polyA_is_-1 coordinates are BetaCoV/England/02/2020; mRNA#11933_1_copies:polyA_is_-1 coordinates are BetaCoV/England/02/2020; mRNA#23898_1_copies:polyA_is_-1 coordinates are BetaCoV/England/02/2020; mRNA#69581_1_copies:polyA_is_-1 coordinates are BetaCoV/England/02/2020; mRNA#42313_1_copies:polyA_is_-1 coordinates are BetaCoV/England/02/2020; mRNA#23741_1_copies:polyA_is_-1 co…
SARS2_pp1ab_nsp12	4	859	871	FVSLAIDAYPLTK	SADAQSFLNRVCGVSAARLTPCGTGTSTDVVYRAFDIYNDKVAGFAKFLKTNCCRFQEKDEDDNLIDSYFVVKRHTFSNYQHEETIYNLLKDCPAVAKHDFFKFRIDGDMVPHISRQRLTKYTMADLVYALRHFDEGNCDTLKEILVTYNCCDDDYFNKKDWYDFVENPDILRVYANLGERVRQALLKTVQFCDAMRNAGIVGVLTLDNQDLNGNWYDFGDFIQTTPGSGVPVVDSYYSLLMPILTLTRALTAESHVDTDLTKPYIKWDLLKYDFTEERLKLFDRYFKYWDQTYHPNCVNCLDDRCILHCANFNVLFSTVFPPTSFGPLVRKIFVDGVPFVVSTGYHFRELGVVHNQDVNLHSSRLSFKELLVYAADPAMHAASGNLLLDKRTTCFSVA…	mRNA#11160_1_copies:polyA_is_-1 coordinates are BetaCoV/England/02/2020; mRNA#11933_1_copies:polyA_is_-1 coordinates are BetaCoV/England/02/2020; mRNA#23898_1_copies:polyA_is_-1 coordinates are BetaCoV/England/02/2020; mRNA#69581_1_copies:polyA_is_-1 coordinates are BetaCoV/England/02/2020; mRNA#42313_1_copies:polyA_is_-1 coordinates are BetaCoV/England/02/2020; mRNA#23741_1_copies:polyA_is_-1 co…
SARS2_pp1ab_nsp12	1	915	932	YWEPEFYEAMYTPHTVLQ	SADAQSFLNRVCGVSAARLTPCGTGTSTDVVYRAFDIYNDKVAGFAKFLKTNCCRFQEKDEDDNLIDSYFVVKRHTFSNYQHEETIYNLLKDCPAVAKHDFFKFRIDGDMVPHISRQRLTKYTMADLVYALRHFDEGNCDTLKEILVTYNCCDDDYFNKKDWYDFVENPDILRVYANLGERVRQALLKTVQFCDAMRNAGIVGVLTLDNQDLNGNWYDFGDFIQTTPGSGVPVVDSYYSLLMPILTLTRALTAESHVDTDLTKPYIKWDLLKYDFTEERLKLFDRYFKYWDQTYHPNCVNCLDDRCILHCANFNVLFSTVFPPTSFGPLVRKIFVDGVPFVVSTGYHFRELGVVHNQDVNLHSSRLSFKELLVYAADPAMHAASGNLLLDKRTTCFSVA…	SARS2_pp1ab_nsp12
SARS2_pp1ab_nsp13	2	1	15	AVGACVLCNSQTSLR	AVGACVLCNSQTSLRCGACIRRPFLCCKCCYDHVISTSHKLVLSVNPYVCNAPGCDVTDVTQLYLGGMSYYCKSHKPPISFPLCANGQVFGLYKNTCVGSDNVTDFNAIATCDWTNAGDYILANTCTERLKLFAAETLKATEETFKLSYGIATVREVLSDRELHLSWEVGKPRPPLNRNYVFTGYRVTKNSKVQIGEYTFEKGDYGDAVVYRGTTTYKLNVGDYFVLTSHTVMPLSAPTLVPQEHYVRITGLYPTLNISDEFSSNVANYQKVGMQKYSTLQGPPGTGKSHFAIGLALYYPSARIVYTACSHAAVDALCEKALKYLPIDKCSRIIPARARVECFDKFKVNSTLEQYVFCTVNALPETTADIVVFDEISMATNYDLSVVNARLRAKHYVYI…	SARS2_pp1ab_nsp13
SARS2_pp1ab_nsp13	1	74	94	SHKPPISFPLCANGQVFGLYK	AVGACVLCNSQTSLRCGACIRRPFLCCKCCYDHVISTSHKLVLSVNPYVCNAPGCDVTDVTQLYLGGMSYYCKSHKPPISFPLCANGQVFGLYKNTCVGSDNVTDFNAIATCDWTNAGDYILANTCTERLKLFAAETLKATEETFKLSYGIATVREVLSDRELHLSWEVGKPRPPLNRNYVFTGYRVTKNSKVQIGEYTFEKGDYGDAVVYRGTTTYKLNVGDYFVLTSHTVMPLSAPTLVPQEHYVRITGLYPTLNISDEFSSNVANYQKVGMQKYSTLQGPPGTGKSHFAIGLALYYPSARIVYTACSHAAVDALCEKALKYLPIDKCSRIIPARARVECFDKFKVNSTLEQYVFCTVNALPETTADIVVFDEISMATNYDLSVVNARLRAKHYVYI…	mRNA#11160_1_copies:polyA_is_-1 coordinates are BetaCoV/England/02/2020; mRNA#77805_1_copies:polyA_is_-1 coordinates are BetaCoV/England/02/2020; mRNA#11933_1_copies:polyA_is_-1 coordinates are BetaCoV/England/02/2020; mRNA#69581_1_copies:polyA_is_-1 coordinates are BetaCoV/England/02/2020; mRNA#42313_1_copies:polyA_is_-1 coordinates are BetaCoV/England/02/2020; mRNA#23741_1_copies:polyA_is_-1 co…
SARS2_pp1ab_nsp13	1	130	139	LKLFAAETLK	AVGACVLCNSQTSLRCGACIRRPFLCCKCCYDHVISTSHKLVLSVNPYVCNAPGCDVTDVTQLYLGGMSYYCKSHKPPISFPLCANGQVFGLYKNTCVGSDNVTDFNAIATCDWTNAGDYILANTCTERLKLFAAETLKATEETFKLSYGIATVREVLSDRELHLSWEVGKPRPPLNRNYVFTGYRVTKNSKVQIGEYTFEKGDYGDAVVYRGTTTYKLNVGDYFVLTSHTVMPLSAPTLVPQEHYVRITGLYPTLNISDEFSSNVANYQKVGMQKYSTLQGPPGTGKSHFAIGLALYYPSARIVYTACSHAAVDALCEKALKYLPIDKCSRIIPARARVECFDKFKVNSTLEQYVFCTVNALPETTADIVVFDEISMATNYDLSVVNARLRAKHYVYI…	mRNA#11160_1_copies:polyA_is_-1 coordinates are BetaCoV/England/02/2020; mRNA#77805_1_copies:polyA_is_-1 coordinates are BetaCoV/England/02/2020; mRNA#11933_1_copies:polyA_is_-1 coordinates are BetaCoV/England/02/2020; mRNA#69581_1_copies:polyA_is_-1 coordinates are BetaCoV/England/02/2020; mRNA#42313_1_copies:polyA_is_-1 coordinates are BetaCoV/England/02/2020; mRNA#23741_1_copies:polyA_is_-1 co…
SARS2_pp1ab_nsp13	3	140	146	ATEETFK	AVGACVLCNSQTSLRCGACIRRPFLCCKCCYDHVISTSHKLVLSVNPYVCNAPGCDVTDVTQLYLGGMSYYCKSHKPPISFPLCANGQVFGLYKNTCVGSDNVTDFNAIATCDWTNAGDYILANTCTERLKLFAAETLKATEETFKLSYGIATVREVLSDRELHLSWEVGKPRPPLNRNYVFTGYRVTKNSKVQIGEYTFEKGDYGDAVVYRGTTTYKLNVGDYFVLTSHTVMPLSAPTLVPQEHYVRITGLYPTLNISDEFSSNVANYQKVGMQKYSTLQGPPGTGKSHFAIGLALYYPSARIVYTACSHAAVDALCEKALKYLPIDKCSRIIPARARVECFDKFKVNSTLEQYVFCTVNALPETTADIVVFDEISMATNYDLSVVNARLRAKHYVYI…	mRNA#11160_1_copies:polyA_is_-1 coordinates are BetaCoV/England/02/2020; mRNA#77805_1_copies:polyA_is_-1 coordinates are BetaCoV/England/02/2020; mRNA#11933_1_copies:polyA_is_-1 coordinates are BetaCoV/England/02/2020; mRNA#69581_1_copies:polyA_is_-1 coordinates are BetaCoV/England/02/2020; mRNA#42313_1_copies:polyA_is_-1 coordinates are BetaCoV/England/02/2020; mRNA#23741_1_copies:polyA_is_-1 co…
SARS2_pp1ab_nsp13	4	147	155	LSYGIATVR	AVGACVLCNSQTSLRCGACIRRPFLCCKCCYDHVISTSHKLVLSVNPYVCNAPGCDVTDVTQLYLGGMSYYCKSHKPPISFPLCANGQVFGLYKNTCVGSDNVTDFNAIATCDWTNAGDYILANTCTERLKLFAAETLKATEETFKLSYGIATVREVLSDRELHLSWEVGKPRPPLNRNYVFTGYRVTKNSKVQIGEYTFEKGDYGDAVVYRGTTTYKLNVGDYFVLTSHTVMPLSAPTLVPQEHYVRITGLYPTLNISDEFSSNVANYQKVGMQKYSTLQGPPGTGKSHFAIGLALYYPSARIVYTACSHAAVDALCEKALKYLPIDKCSRIIPARARVECFDKFKVNSTLEQYVFCTVNALPETTADIVVFDEISMATNYDLSVVNARLRAKHYVYI…	mRNA#11160_1_copies:polyA_is_-1 coordinates are BetaCoV/England/02/2020; mRNA#77805_1_copies:polyA_is_-1 coordinates are BetaCoV/England/02/2020; mRNA#11933_1_copies:polyA_is_-1 coordinates are BetaCoV/England/02/2020; mRNA#69581_1_copies:polyA_is_-1 coordinates are BetaCoV/England/02/2020; mRNA#42313_1_copies:polyA_is_-1 coordinates are BetaCoV/England/02/2020; mRNA#23741_1_copies:polyA_is_-1 co…
SARS2_pp1ab_nsp13	1	162	178	ELHLSWEVGKPRPPLNR	AVGACVLCNSQTSLRCGACIRRPFLCCKCCYDHVISTSHKLVLSVNPYVCNAPGCDVTDVTQLYLGGMSYYCKSHKPPISFPLCANGQVFGLYKNTCVGSDNVTDFNAIATCDWTNAGDYILANTCTERLKLFAAETLKATEETFKLSYGIATVREVLSDRELHLSWEVGKPRPPLNRNYVFTGYRVTKNSKVQIGEYTFEKGDYGDAVVYRGTTTYKLNVGDYFVLTSHTVMPLSAPTLVPQEHYVRITGLYPTLNISDEFSSNVANYQKVGMQKYSTLQGPPGTGKSHFAIGLALYYPSARIVYTACSHAAVDALCEKALKYLPIDKCSRIIPARARVECFDKFKVNSTLEQYVFCTVNALPETTADIVVFDEISMATNYDLSVVNARLRAKHYVYI…	mRNA#11160_1_copies:polyA_is_-1 coordinates are BetaCoV/England/02/2020; mRNA#77805_1_copies:polyA_is_-1 coordinates are BetaCoV/England/02/2020; mRNA#11933_1_copies:polyA_is_-1 coordinates are BetaCoV/England/02/2020; mRNA#69581_1_copies:polyA_is_-1 coordinates are BetaCoV/England/02/2020; mRNA#42313_1_copies:polyA_is_-1 coordinates are BetaCoV/England/02/2020; mRNA#23741_1_copies:polyA_is_-1 co…
SARS2_pp1ab_nsp13	1	179	186	NYVFTGYR	AVGACVLCNSQTSLRCGACIRRPFLCCKCCYDHVISTSHKLVLSVNPYVCNAPGCDVTDVTQLYLGGMSYYCKSHKPPISFPLCANGQVFGLYKNTCVGSDNVTDFNAIATCDWTNAGDYILANTCTERLKLFAAETLKATEETFKLSYGIATVREVLSDRELHLSWEVGKPRPPLNRNYVFTGYRVTKNSKVQIGEYTFEKGDYGDAVVYRGTTTYKLNVGDYFVLTSHTVMPLSAPTLVPQEHYVRITGLYPTLNISDEFSSNVANYQKVGMQKYSTLQGPPGTGKSHFAIGLALYYPSARIVYTACSHAAVDALCEKALKYLPIDKCSRIIPARARVECFDKFKVNSTLEQYVFCTVNALPETTADIVVFDEISMATNYDLSVVNARLRAKHYVYI…	mRNA#11160_1_copies:polyA_is_-1 coordinates are BetaCoV/England/02/2020; mRNA#77805_1_copies:polyA_is_-1 coordinates are BetaCoV/England/02/2020; mRNA#11933_1_copies:polyA_is_-1 coordinates are BetaCoV/England/02/2020; mRNA#69581_1_copies:polyA_is_-1 coordinates are BetaCoV/England/02/2020; mRNA#42313_1_copies:polyA_is_-1 coordinates are BetaCoV/England/02/2020; mRNA#23741_1_copies:polyA_is_-1 co…
SARS2_pp1ab_nsp13	5	193	202	VQIGEYTFEK	AVGACVLCNSQTSLRCGACIRRPFLCCKCCYDHVISTSHKLVLSVNPYVCNAPGCDVTDVTQLYLGGMSYYCKSHKPPISFPLCANGQVFGLYKNTCVGSDNVTDFNAIATCDWTNAGDYILANTCTERLKLFAAETLKATEETFKLSYGIATVREVLSDRELHLSWEVGKPRPPLNRNYVFTGYRVTKNSKVQIGEYTFEKGDYGDAVVYRGTTTYKLNVGDYFVLTSHTVMPLSAPTLVPQEHYVRITGLYPTLNISDEFSSNVANYQKVGMQKYSTLQGPPGTGKSHFAIGLALYYPSARIVYTACSHAAVDALCEKALKYLPIDKCSRIIPARARVECFDKFKVNSTLEQYVFCTVNALPETTADIVVFDEISMATNYDLSVVNARLRAKHYVYI…	mRNA#11160_1_copies:polyA_is_-1 coordinates are BetaCoV/England/02/2020; mRNA#77805_1_copies:polyA_is_-1 coordinates are BetaCoV/England/02/2020; mRNA#11933_1_copies:polyA_is_-1 coordinates are BetaCoV/England/02/2020; mRNA#69581_1_copies:polyA_is_-1 coordinates are BetaCoV/England/02/2020; mRNA#42313_1_copies:polyA_is_-1 coordinates are BetaCoV/England/02/2020; mRNA#23741_1_copies:polyA_is_-1 co…
SARS2_pp1ab_nsp13	3	203	212	GDYGDAVVYR	AVGACVLCNSQTSLRCGACIRRPFLCCKCCYDHVISTSHKLVLSVNPYVCNAPGCDVTDVTQLYLGGMSYYCKSHKPPISFPLCANGQVFGLYKNTCVGSDNVTDFNAIATCDWTNAGDYILANTCTERLKLFAAETLKATEETFKLSYGIATVREVLSDRELHLSWEVGKPRPPLNRNYVFTGYRVTKNSKVQIGEYTFEKGDYGDAVVYRGTTTYKLNVGDYFVLTSHTVMPLSAPTLVPQEHYVRITGLYPTLNISDEFSSNVANYQKVGMQKYSTLQGPPGTGKSHFAIGLALYYPSARIVYTACSHAAVDALCEKALKYLPIDKCSRIIPARARVECFDKFKVNSTLEQYVFCTVNALPETTADIVVFDEISMATNYDLSVVNARLRAKHYVYI…	mRNA#11160_1_copies:polyA_is_-1 coordinates are BetaCoV/England/02/2020; mRNA#77805_1_copies:polyA_is_-1 coordinates are BetaCoV/England/02/2020; mRNA#11933_1_copies:polyA_is_-1 coordinates are BetaCoV/England/02/2020; mRNA#69581_1_copies:polyA_is_-1 coordinates are BetaCoV/England/02/2020; mRNA#42313_1_copies:polyA_is_-1 coordinates are BetaCoV/England/02/2020; mRNA#23741_1_copies:polyA_is_-1 co…
SARS2_pp1ab_nsp13	3	249	271	ITGLYPTLNISDEFSSNVANYQK	AVGACVLCNSQTSLRCGACIRRPFLCCKCCYDHVISTSHKLVLSVNPYVCNAPGCDVTDVTQLYLGGMSYYCKSHKPPISFPLCANGQVFGLYKNTCVGSDNVTDFNAIATCDWTNAGDYILANTCTERLKLFAAETLKATEETFKLSYGIATVREVLSDRELHLSWEVGKPRPPLNRNYVFTGYRVTKNSKVQIGEYTFEKGDYGDAVVYRGTTTYKLNVGDYFVLTSHTVMPLSAPTLVPQEHYVRITGLYPTLNISDEFSSNVANYQKVGMQKYSTLQGPPGTGKSHFAIGLALYYPSARIVYTACSHAAVDALCEKALKYLPIDKCSRIIPARARVECFDKFKVNSTLEQYVFCTVNALPETTADIVVFDEISMATNYDLSVVNARLRAKHYVYI…	mRNA#11160_1_copies:polyA_is_-1 coordinates are BetaCoV/England/02/2020; mRNA#77805_1_copies:polyA_is_-1 coordinates are BetaCoV/England/02/2020; mRNA#11933_1_copies:polyA_is_-1 coordinates are BetaCoV/England/02/2020; mRNA#69581_1_copies:polyA_is_-1 coordinates are BetaCoV/England/02/2020; mRNA#42313_1_copies:polyA_is_-1 coordinates are BetaCoV/England/02/2020; mRNA#54838_1_copies:polyA_is_-1 co…
SARS2_pp1ab_nsp13	7	277	288	YSTLQGPPGTGK	AVGACVLCNSQTSLRCGACIRRPFLCCKCCYDHVISTSHKLVLSVNPYVCNAPGCDVTDVTQLYLGGMSYYCKSHKPPISFPLCANGQVFGLYKNTCVGSDNVTDFNAIATCDWTNAGDYILANTCTERLKLFAAETLKATEETFKLSYGIATVREVLSDRELHLSWEVGKPRPPLNRNYVFTGYRVTKNSKVQIGEYTFEKGDYGDAVVYRGTTTYKLNVGDYFVLTSHTVMPLSAPTLVPQEHYVRITGLYPTLNISDEFSSNVANYQKVGMQKYSTLQGPPGTGKSHFAIGLALYYPSARIVYTACSHAAVDALCEKALKYLPIDKCSRIIPARARVECFDKFKVNSTLEQYVFCTVNALPETTADIVVFDEISMATNYDLSVVNARLRAKHYVYI…	mRNA#11160_1_copies:polyA_is_-1 coordinates are BetaCoV/England/02/2020; mRNA#77805_1_copies:polyA_is_-1 coordinates are BetaCoV/England/02/2020; mRNA#11933_1_copies:polyA_is_-1 coordinates are BetaCoV/England/02/2020; mRNA#69581_1_copies:polyA_is_-1 coordinates are BetaCoV/England/02/2020; mRNA#42313_1_copies:polyA_is_-1 coordinates are BetaCoV/England/02/2020; mRNA#54838_1_copies:polyA_is_-1 co…
SARS2_pp1ab_nsp13	5	304	320	IVYTACSHAAVDALCEK	AVGACVLCNSQTSLRCGACIRRPFLCCKCCYDHVISTSHKLVLSVNPYVCNAPGCDVTDVTQLYLGGMSYYCKSHKPPISFPLCANGQVFGLYKNTCVGSDNVTDFNAIATCDWTNAGDYILANTCTERLKLFAAETLKATEETFKLSYGIATVREVLSDRELHLSWEVGKPRPPLNRNYVFTGYRVTKNSKVQIGEYTFEKGDYGDAVVYRGTTTYKLNVGDYFVLTSHTVMPLSAPTLVPQEHYVRITGLYPTLNISDEFSSNVANYQKVGMQKYSTLQGPPGTGKSHFAIGLALYYPSARIVYTACSHAAVDALCEKALKYLPIDKCSRIIPARARVECFDKFKVNSTLEQYVFCTVNALPETTADIVVFDEISMATNYDLSVVNARLRAKHYVYI…	mRNA#11160_1_copies:polyA_is_-1 coordinates are BetaCoV/England/02/2020; mRNA#77805_1_copies:polyA_is_-1 coordinates are BetaCoV/England/02/2020; mRNA#11933_1_copies:polyA_is_-1 coordinates are BetaCoV/England/02/2020; mRNA#69581_1_copies:polyA_is_-1 coordinates are BetaCoV/England/02/2020; mRNA#42313_1_copies:polyA_is_-1 coordinates are BetaCoV/England/02/2020; mRNA#54838_1_copies:polyA_is_-1 co…
SARS2_pp1ab_nsp13	2	395	409	HYVYIGDPAQLPAPR	AVGACVLCNSQTSLRCGACIRRPFLCCKCCYDHVISTSHKLVLSVNPYVCNAPGCDVTDVTQLYLGGMSYYCKSHKPPISFPLCANGQVFGLYKNTCVGSDNVTDFNAIATCDWTNAGDYILANTCTERLKLFAAETLKATEETFKLSYGIATVREVLSDRELHLSWEVGKPRPPLNRNYVFTGYRVTKNSKVQIGEYTFEKGDYGDAVVYRGTTTYKLNVGDYFVLTSHTVMPLSAPTLVPQEHYVRITGLYPTLNISDEFSSNVANYQKVGMQKYSTLQGPPGTGKSHFAIGLALYYPSARIVYTACSHAAVDALCEKALKYLPIDKCSRIIPARARVECFDKFKVNSTLEQYVFCTVNALPETTADIVVFDEISMATNYDLSVVNARLRAKHYVYI…	mRNA#11160_1_copies:polyA_is_-1 coordinates are BetaCoV/England/02/2020; mRNA#77805_1_copies:polyA_is_-1 coordinates are BetaCoV/England/02/2020; mRNA#11933_1_copies:polyA_is_-1 coordinates are BetaCoV/England/02/2020; mRNA#69581_1_copies:polyA_is_-1 coordinates are BetaCoV/England/02/2020; mRNA#42313_1_copies:polyA_is_-1 coordinates are BetaCoV/England/02/2020; mRNA#54838_1_copies:polyA_is_-1 co…
SARS2_pp1ab_nsp13	2	415	427	GTLEPEYFNSVCR	AVGACVLCNSQTSLRCGACIRRPFLCCKCCYDHVISTSHKLVLSVNPYVCNAPGCDVTDVTQLYLGGMSYYCKSHKPPISFPLCANGQVFGLYKNTCVGSDNVTDFNAIATCDWTNAGDYILANTCTERLKLFAAETLKATEETFKLSYGIATVREVLSDRELHLSWEVGKPRPPLNRNYVFTGYRVTKNSKVQIGEYTFEKGDYGDAVVYRGTTTYKLNVGDYFVLTSHTVMPLSAPTLVPQEHYVRITGLYPTLNISDEFSSNVANYQKVGMQKYSTLQGPPGTGKSHFAIGLALYYPSARIVYTACSHAAVDALCEKALKYLPIDKCSRIIPARARVECFDKFKVNSTLEQYVFCTVNALPETTADIVVFDEISMATNYDLSVVNARLRAKHYVYI…	mRNA#11160_1_copies:polyA_is_-1 coordinates are BetaCoV/England/02/2020; mRNA#77805_1_copies:polyA_is_-1 coordinates are BetaCoV/England/02/2020; mRNA#11933_1_copies:polyA_is_-1 coordinates are BetaCoV/England/02/2020; mRNA#69581_1_copies:polyA_is_-1 coordinates are BetaCoV/England/02/2020; mRNA#42313_1_copies:polyA_is_-1 coordinates are BetaCoV/England/02/2020; mRNA#54838_1_copies:polyA_is_-1 co…
SARS2_pp1ab_nsp13	1	431	442	TIGPDMFLGTCR	AVGACVLCNSQTSLRCGACIRRPFLCCKCCYDHVISTSHKLVLSVNPYVCNAPGCDVTDVTQLYLGGMSYYCKSHKPPISFPLCANGQVFGLYKNTCVGSDNVTDFNAIATCDWTNAGDYILANTCTERLKLFAAETLKATEETFKLSYGIATVREVLSDRELHLSWEVGKPRPPLNRNYVFTGYRVTKNSKVQIGEYTFEKGDYGDAVVYRGTTTYKLNVGDYFVLTSHTVMPLSAPTLVPQEHYVRITGLYPTLNISDEFSSNVANYQKVGMQKYSTLQGPPGTGKSHFAIGLALYYPSARIVYTACSHAAVDALCEKALKYLPIDKCSRIIPARARVECFDKFKVNSTLEQYVFCTVNALPETTADIVVFDEISMATNYDLSVVNARLRAKHYVYI…	mRNA#11160_1_copies:polyA_is_-1 coordinates are BetaCoV/England/02/2020; mRNA#77805_1_copies:polyA_is_-1 coordinates are BetaCoV/England/02/2020; mRNA#11933_1_copies:polyA_is_-1 coordinates are BetaCoV/England/02/2020; mRNA#69581_1_copies:polyA_is_-1 coordinates are BetaCoV/England/02/2020; mRNA#42313_1_copies:polyA_is_-1 coordinates are BetaCoV/England/02/2020; mRNA#54838_1_copies:polyA_is_-1 co…
SARS2_pp1ab_nsp13	1	443	460	RCPAEIVDTVSALVYDNK	AVGACVLCNSQTSLRCGACIRRPFLCCKCCYDHVISTSHKLVLSVNPYVCNAPGCDVTDVTQLYLGGMSYYCKSHKPPISFPLCANGQVFGLYKNTCVGSDNVTDFNAIATCDWTNAGDYILANTCTERLKLFAAETLKATEETFKLSYGIATVREVLSDRELHLSWEVGKPRPPLNRNYVFTGYRVTKNSKVQIGEYTFEKGDYGDAVVYRGTTTYKLNVGDYFVLTSHTVMPLSAPTLVPQEHYVRITGLYPTLNISDEFSSNVANYQKVGMQKYSTLQGPPGTGKSHFAIGLALYYPSARIVYTACSHAAVDALCEKALKYLPIDKCSRIIPARARVECFDKFKVNSTLEQYVFCTVNALPETTADIVVFDEISMATNYDLSVVNARLRAKHYVYI…	mRNA#11160_1_copies:polyA_is_-1 coordinates are BetaCoV/England/02/2020; mRNA#77805_1_copies:polyA_is_-1 coordinates are BetaCoV/England/02/2020; mRNA#11933_1_copies:polyA_is_-1 coordinates are BetaCoV/England/02/2020; mRNA#69581_1_copies:polyA_is_-1 coordinates are BetaCoV/England/02/2020; mRNA#42313_1_copies:polyA_is_-1 coordinates are BetaCoV/England/02/2020; mRNA#54838_1_copies:polyA_is_-1 co…
SARS2_pp1ab_nsp13	3	444	460	CPAEIVDTVSALVYDNK	AVGACVLCNSQTSLRCGACIRRPFLCCKCCYDHVISTSHKLVLSVNPYVCNAPGCDVTDVTQLYLGGMSYYCKSHKPPISFPLCANGQVFGLYKNTCVGSDNVTDFNAIATCDWTNAGDYILANTCTERLKLFAAETLKATEETFKLSYGIATVREVLSDRELHLSWEVGKPRPPLNRNYVFTGYRVTKNSKVQIGEYTFEKGDYGDAVVYRGTTTYKLNVGDYFVLTSHTVMPLSAPTLVPQEHYVRITGLYPTLNISDEFSSNVANYQKVGMQKYSTLQGPPGTGKSHFAIGLALYYPSARIVYTACSHAAVDALCEKALKYLPIDKCSRIIPARARVECFDKFKVNSTLEQYVFCTVNALPETTADIVVFDEISMATNYDLSVVNARLRAKHYVYI…	mRNA#11160_1_copies:polyA_is_-1 coordinates are BetaCoV/England/02/2020; mRNA#77805_1_copies:polyA_is_-1 coordinates are BetaCoV/England/02/2020; mRNA#11933_1_copies:polyA_is_-1 coordinates are BetaCoV/England/02/2020; mRNA#69581_1_copies:polyA_is_-1 coordinates are BetaCoV/England/02/2020; mRNA#42313_1_copies:polyA_is_-1 coordinates are BetaCoV/England/02/2020; mRNA#54838_1_copies:polyA_is_-1 co…
SARS2_pp1ab_nsp13	8	478	497	GVITHDVSSAINRPQIGVVR	AVGACVLCNSQTSLRCGACIRRPFLCCKCCYDHVISTSHKLVLSVNPYVCNAPGCDVTDVTQLYLGGMSYYCKSHKPPISFPLCANGQVFGLYKNTCVGSDNVTDFNAIATCDWTNAGDYILANTCTERLKLFAAETLKATEETFKLSYGIATVREVLSDRELHLSWEVGKPRPPLNRNYVFTGYRVTKNSKVQIGEYTFEKGDYGDAVVYRGTTTYKLNVGDYFVLTSHTVMPLSAPTLVPQEHYVRITGLYPTLNISDEFSSNVANYQKVGMQKYSTLQGPPGTGKSHFAIGLALYYPSARIVYTACSHAAVDALCEKALKYLPIDKCSRIIPARARVECFDKFKVNSTLEQYVFCTVNALPETTADIVVFDEISMATNYDLSVVNARLRAKHYVYI…	mRNA#11160_1_copies:polyA_is_-1 coordinates are BetaCoV/England/02/2020; mRNA#77805_1_copies:polyA_is_-1 coordinates are BetaCoV/England/02/2020; mRNA#11933_1_copies:polyA_is_-1 coordinates are BetaCoV/England/02/2020; mRNA#69581_1_copies:polyA_is_-1 coordinates are BetaCoV/England/02/2020; mRNA#42154_1_copies:polyA_is_-1 coordinates are BetaCoV/England/02/2020; mRNA#42313_1_copies:polyA_is_-1 co…
SARS2_pp1ab_nsp13	1	508	524	KAVFISPYNSQNAVASK	AVGACVLCNSQTSLRCGACIRRPFLCCKCCYDHVISTSHKLVLSVNPYVCNAPGCDVTDVTQLYLGGMSYYCKSHKPPISFPLCANGQVFGLYKNTCVGSDNVTDFNAIATCDWTNAGDYILANTCTERLKLFAAETLKATEETFKLSYGIATVREVLSDRELHLSWEVGKPRPPLNRNYVFTGYRVTKNSKVQIGEYTFEKGDYGDAVVYRGTTTYKLNVGDYFVLTSHTVMPLSAPTLVPQEHYVRITGLYPTLNISDEFSSNVANYQKVGMQKYSTLQGPPGTGKSHFAIGLALYYPSARIVYTACSHAAVDALCEKALKYLPIDKCSRIIPARARVECFDKFKVNSTLEQYVFCTVNALPETTADIVVFDEISMATNYDLSVVNARLRAKHYVYI…	mRNA#11160_1_copies:polyA_is_-1 coordinates are BetaCoV/England/02/2020; mRNA#77805_1_copies:polyA_is_-1 coordinates are BetaCoV/England/02/2020; mRNA#11933_1_copies:polyA_is_-1 coordinates are BetaCoV/England/02/2020; mRNA#69581_1_copies:polyA_is_-1 coordinates are BetaCoV/England/02/2020; mRNA#42154_1_copies:polyA_is_-1 coordinates are BetaCoV/England/02/2020; mRNA#42313_1_copies:polyA_is_-1 co…
SARS2_pp1ab_nsp13	8	509	524	AVFISPYNSQNAVASK	AVGACVLCNSQTSLRCGACIRRPFLCCKCCYDHVISTSHKLVLSVNPYVCNAPGCDVTDVTQLYLGGMSYYCKSHKPPISFPLCANGQVFGLYKNTCVGSDNVTDFNAIATCDWTNAGDYILANTCTERLKLFAAETLKATEETFKLSYGIATVREVLSDRELHLSWEVGKPRPPLNRNYVFTGYRVTKNSKVQIGEYTFEKGDYGDAVVYRGTTTYKLNVGDYFVLTSHTVMPLSAPTLVPQEHYVRITGLYPTLNISDEFSSNVANYQKVGMQKYSTLQGPPGTGKSHFAIGLALYYPSARIVYTACSHAAVDALCEKALKYLPIDKCSRIIPARARVECFDKFKVNSTLEQYVFCTVNALPETTADIVVFDEISMATNYDLSVVNARLRAKHYVYI…	mRNA#11160_1_copies:polyA_is_-1 coordinates are BetaCoV/England/02/2020; mRNA#77805_1_copies:polyA_is_-1 coordinates are BetaCoV/England/02/2020; mRNA#11933_1_copies:polyA_is_-1 coordinates are BetaCoV/England/02/2020; mRNA#69581_1_copies:polyA_is_-1 coordinates are BetaCoV/England/02/2020; mRNA#42154_1_copies:polyA_is_-1 coordinates are BetaCoV/England/02/2020; mRNA#42313_1_copies:polyA_is_-1 co…
SARS2_pp1ab_nsp13	5	561	567	FNVAITR	AVGACVLCNSQTSLRCGACIRRPFLCCKCCYDHVISTSHKLVLSVNPYVCNAPGCDVTDVTQLYLGGMSYYCKSHKPPISFPLCANGQVFGLYKNTCVGSDNVTDFNAIATCDWTNAGDYILANTCTERLKLFAAETLKATEETFKLSYGIATVREVLSDRELHLSWEVGKPRPPLNRNYVFTGYRVTKNSKVQIGEYTFEKGDYGDAVVYRGTTTYKLNVGDYFVLTSHTVMPLSAPTLVPQEHYVRITGLYPTLNISDEFSSNVANYQKVGMQKYSTLQGPPGTGKSHFAIGLALYYPSARIVYTACSHAAVDALCEKALKYLPIDKCSRIIPARARVECFDKFKVNSTLEQYVFCTVNALPETTADIVVFDEISMATNYDLSVVNARLRAKHYVYI…	mRNA#11160_1_copies:polyA_is_-1 coordinates are BetaCoV/England/02/2020; mRNA#77805_1_copies:polyA_is_-1 coordinates are BetaCoV/England/02/2020; mRNA#11933_1_copies:polyA_is_-1 coordinates are BetaCoV/England/02/2020; mRNA#69581_1_copies:polyA_is_-1 coordinates are BetaCoV/England/02/2020; mRNA#42154_1_copies:polyA_is_-1 coordinates are BetaCoV/England/02/2020; mRNA#42313_1_copies:polyA_is_-1 co…
SARS2_pp1ab_nsp13	1	570	584	VGILCIMSDRDLYDK	AVGACVLCNSQTSLRCGACIRRPFLCCKCCYDHVISTSHKLVLSVNPYVCNAPGCDVTDVTQLYLGGMSYYCKSHKPPISFPLCANGQVFGLYKNTCVGSDNVTDFNAIATCDWTNAGDYILANTCTERLKLFAAETLKATEETFKLSYGIATVREVLSDRELHLSWEVGKPRPPLNRNYVFTGYRVTKNSKVQIGEYTFEKGDYGDAVVYRGTTTYKLNVGDYFVLTSHTVMPLSAPTLVPQEHYVRITGLYPTLNISDEFSSNVANYQKVGMQKYSTLQGPPGTGKSHFAIGLALYYPSARIVYTACSHAAVDALCEKALKYLPIDKCSRIIPARARVECFDKFKVNSTLEQYVFCTVNALPETTADIVVFDEISMATNYDLSVVNARLRAKHYVYI…	mRNA#11160_1_copies:polyA_is_-1 coordinates are BetaCoV/England/02/2020; mRNA#77805_1_copies:polyA_is_-1 coordinates are BetaCoV/England/02/2020; mRNA#11933_1_copies:polyA_is_-1 coordinates are BetaCoV/England/02/2020; mRNA#69581_1_copies:polyA_is_-1 coordinates are BetaCoV/England/02/2020; mRNA#42154_1_copies:polyA_is_-1 coordinates are BetaCoV/England/02/2020; mRNA#42313_1_copies:polyA_is_-1 co…
SARS2_pp1ab_nsp13	1	580	594	DLYDKLQFTSLEIPR	AVGACVLCNSQTSLRCGACIRRPFLCCKCCYDHVISTSHKLVLSVNPYVCNAPGCDVTDVTQLYLGGMSYYCKSHKPPISFPLCANGQVFGLYKNTCVGSDNVTDFNAIATCDWTNAGDYILANTCTERLKLFAAETLKATEETFKLSYGIATVREVLSDRELHLSWEVGKPRPPLNRNYVFTGYRVTKNSKVQIGEYTFEKGDYGDAVVYRGTTTYKLNVGDYFVLTSHTVMPLSAPTLVPQEHYVRITGLYPTLNISDEFSSNVANYQKVGMQKYSTLQGPPGTGKSHFAIGLALYYPSARIVYTACSHAAVDALCEKALKYLPIDKCSRIIPARARVECFDKFKVNSTLEQYVFCTVNALPETTADIVVFDEISMATNYDLSVVNARLRAKHYVYI…	mRNA#11160_1_copies:polyA_is_-1 coordinates are BetaCoV/England/02/2020; mRNA#77805_1_copies:polyA_is_-1 coordinates are BetaCoV/England/02/2020; mRNA#11933_1_copies:polyA_is_-1 coordinates are BetaCoV/England/02/2020; mRNA#69581_1_copies:polyA_is_-1 coordinates are BetaCoV/England/02/2020; mRNA#42154_1_copies:polyA_is_-1 coordinates are BetaCoV/England/02/2020; mRNA#42313_1_copies:polyA_is_-1 co…
SARS2_pp1ab_nsp13	1	585	594	LQFTSLEIPR	AVGACVLCNSQTSLRCGACIRRPFLCCKCCYDHVISTSHKLVLSVNPYVCNAPGCDVTDVTQLYLGGMSYYCKSHKPPISFPLCANGQVFGLYKNTCVGSDNVTDFNAIATCDWTNAGDYILANTCTERLKLFAAETLKATEETFKLSYGIATVREVLSDRELHLSWEVGKPRPPLNRNYVFTGYRVTKNSKVQIGEYTFEKGDYGDAVVYRGTTTYKLNVGDYFVLTSHTVMPLSAPTLVPQEHYVRITGLYPTLNISDEFSSNVANYQKVGMQKYSTLQGPPGTGKSHFAIGLALYYPSARIVYTACSHAAVDALCEKALKYLPIDKCSRIIPARARVECFDKFKVNSTLEQYVFCTVNALPETTADIVVFDEISMATNYDLSVVNARLRAKHYVYI…	mRNA#11160_1_copies:polyA_is_-1 coordinates are BetaCoV/England/02/2020; mRNA#77805_1_copies:polyA_is_-1 coordinates are BetaCoV/England/02/2020; mRNA#11933_1_copies:polyA_is_-1 coordinates are BetaCoV/England/02/2020; mRNA#69581_1_copies:polyA_is_-1 coordinates are BetaCoV/England/02/2020; mRNA#42154_1_copies:polyA_is_-1 coordinates are BetaCoV/England/02/2020; mRNA#42313_1_copies:polyA_is_-1 co…
SARS2_pp1ab_nsp14	4	1	9	AENVTGLFK	AENVTGLFKDCSKVITGLHPTQAPTHLSVDTKFKTEGLCVDIPGIPKDMTYRRLISMMGFKMNYQVNGYPNMFITREEAIRHVRAWIGFDVEGCHATREAVGTNLPLQLGFSTGVNLVAVPTGYVDTPNNTDFSRVSAKPPPGDQFKHLIPLMYKGLPWNVVRIKIVQMLSDTLKNLSDRVVFVLWAHGFELTSMKYFVKIGPERTCCLCDRRATCFSTASDTYACWHHSIGFDYVYNPFMIDVQQWGFTGNLQSNHDLYCQVHGNAHVASCDAIMTRCLAVHECFVKRVDWTIEYPIIGDELKINAACRKVQHMVVKAALLADKFPVLHDIGNPKAIKCVPQADVEWKFYDAQPCSDKAYKIEELFYSYATHSDKFTDGVCLFWNCNVDRYPANSIVC…	SARS2_pp1ab_nsp14
SARS2_pp1ab_nsp14	3	14	32	VITGLHPTQAPTHLSVDTK	AENVTGLFKDCSKVITGLHPTQAPTHLSVDTKFKTEGLCVDIPGIPKDMTYRRLISMMGFKMNYQVNGYPNMFITREEAIRHVRAWIGFDVEGCHATREAVGTNLPLQLGFSTGVNLVAVPTGYVDTPNNTDFSRVSAKPPPGDQFKHLIPLMYKGLPWNVVRIKIVQMLSDTLKNLSDRVVFVLWAHGFELTSMKYFVKIGPERTCCLCDRRATCFSTASDTYACWHHSIGFDYVYNPFMIDVQQWGFTGNLQSNHDLYCQVHGNAHVASCDAIMTRCLAVHECFVKRVDWTIEYPIIGDELKINAACRKVQHMVVKAALLADKFPVLHDIGNPKAIKCVPQADVEWKFYDAQPCSDKAYKIEELFYSYATHSDKFTDGVCLFWNCNVDRYPANSIVC…	mRNA#11160_1_copies:polyA_is_-1 coordinates are BetaCoV/England/02/2020; mRNA#77805_1_copies:polyA_is_-1 coordinates are BetaCoV/England/02/2020; mRNA#11933_1_copies:polyA_is_-1 coordinates are BetaCoV/England/02/2020; mRNA#69581_1_copies:polyA_is_-1 coordinates are BetaCoV/England/02/2020; mRNA#42154_1_copies:polyA_is_-1 coordinates are BetaCoV/England/02/2020; mRNA#42313_1_copies:polyA_is_-1 co…
SARS2_pp1ab_nsp14	1	33	47	FKTEGLCVDIPGIPK	AENVTGLFKDCSKVITGLHPTQAPTHLSVDTKFKTEGLCVDIPGIPKDMTYRRLISMMGFKMNYQVNGYPNMFITREEAIRHVRAWIGFDVEGCHATREAVGTNLPLQLGFSTGVNLVAVPTGYVDTPNNTDFSRVSAKPPPGDQFKHLIPLMYKGLPWNVVRIKIVQMLSDTLKNLSDRVVFVLWAHGFELTSMKYFVKIGPERTCCLCDRRATCFSTASDTYACWHHSIGFDYVYNPFMIDVQQWGFTGNLQSNHDLYCQVHGNAHVASCDAIMTRCLAVHECFVKRVDWTIEYPIIGDELKINAACRKVQHMVVKAALLADKFPVLHDIGNPKAIKCVPQADVEWKFYDAQPCSDKAYKIEELFYSYATHSDKFTDGVCLFWNCNVDRYPANSIVC…	mRNA#11160_1_copies:polyA_is_-1 coordinates are BetaCoV/England/02/2020; mRNA#77805_1_copies:polyA_is_-1 coordinates are BetaCoV/England/02/2020; mRNA#11933_1_copies:polyA_is_-1 coordinates are BetaCoV/England/02/2020; mRNA#69581_1_copies:polyA_is_-1 coordinates are BetaCoV/England/02/2020; mRNA#42154_1_copies:polyA_is_-1 coordinates are BetaCoV/England/02/2020; mRNA#42313_1_copies:polyA_is_-1 co…
SARS2_pp1ab_nsp14	1	54	61	LISMMGFK	AENVTGLFKDCSKVITGLHPTQAPTHLSVDTKFKTEGLCVDIPGIPKDMTYRRLISMMGFKMNYQVNGYPNMFITREEAIRHVRAWIGFDVEGCHATREAVGTNLPLQLGFSTGVNLVAVPTGYVDTPNNTDFSRVSAKPPPGDQFKHLIPLMYKGLPWNVVRIKIVQMLSDTLKNLSDRVVFVLWAHGFELTSMKYFVKIGPERTCCLCDRRATCFSTASDTYACWHHSIGFDYVYNPFMIDVQQWGFTGNLQSNHDLYCQVHGNAHVASCDAIMTRCLAVHECFVKRVDWTIEYPIIGDELKINAACRKVQHMVVKAALLADKFPVLHDIGNPKAIKCVPQADVEWKFYDAQPCSDKAYKIEELFYSYATHSDKFTDGVCLFWNCNVDRYPANSIVC…	mRNA#11160_1_copies:polyA_is_-1 coordinates are BetaCoV/England/02/2020; mRNA#77805_1_copies:polyA_is_-1 coordinates are BetaCoV/England/02/2020; mRNA#11933_1_copies:polyA_is_-1 coordinates are BetaCoV/England/02/2020; mRNA#69581_1_copies:polyA_is_-1 coordinates are BetaCoV/England/02/2020; mRNA#42154_1_copies:polyA_is_-1 coordinates are BetaCoV/England/02/2020; mRNA#42313_1_copies:polyA_is_-1 co…
SARS2_pp1ab_nsp14	1	62	76	MNYQVNGYPNMFITR	AENVTGLFKDCSKVITGLHPTQAPTHLSVDTKFKTEGLCVDIPGIPKDMTYRRLISMMGFKMNYQVNGYPNMFITREEAIRHVRAWIGFDVEGCHATREAVGTNLPLQLGFSTGVNLVAVPTGYVDTPNNTDFSRVSAKPPPGDQFKHLIPLMYKGLPWNVVRIKIVQMLSDTLKNLSDRVVFVLWAHGFELTSMKYFVKIGPERTCCLCDRRATCFSTASDTYACWHHSIGFDYVYNPFMIDVQQWGFTGNLQSNHDLYCQVHGNAHVASCDAIMTRCLAVHECFVKRVDWTIEYPIIGDELKINAACRKVQHMVVKAALLADKFPVLHDIGNPKAIKCVPQADVEWKFYDAQPCSDKAYKIEELFYSYATHSDKFTDGVCLFWNCNVDRYPANSIVC…	mRNA#11160_1_copies:polyA_is_-1 coordinates are BetaCoV/England/02/2020; mRNA#77805_1_copies:polyA_is_-1 coordinates are BetaCoV/England/02/2020; mRNA#11933_1_copies:polyA_is_-1 coordinates are BetaCoV/England/02/2020; mRNA#69581_1_copies:polyA_is_-1 coordinates are BetaCoV/England/02/2020; mRNA#42154_1_copies:polyA_is_-1 coordinates are BetaCoV/England/02/2020; mRNA#42313_1_copies:polyA_is_-1 co…
SARS2_pp1ab_nsp14	1	85	98	AWIGFDVEGCHATR	AENVTGLFKDCSKVITGLHPTQAPTHLSVDTKFKTEGLCVDIPGIPKDMTYRRLISMMGFKMNYQVNGYPNMFITREEAIRHVRAWIGFDVEGCHATREAVGTNLPLQLGFSTGVNLVAVPTGYVDTPNNTDFSRVSAKPPPGDQFKHLIPLMYKGLPWNVVRIKIVQMLSDTLKNLSDRVVFVLWAHGFELTSMKYFVKIGPERTCCLCDRRATCFSTASDTYACWHHSIGFDYVYNPFMIDVQQWGFTGNLQSNHDLYCQVHGNAHVASCDAIMTRCLAVHECFVKRVDWTIEYPIIGDELKINAACRKVQHMVVKAALLADKFPVLHDIGNPKAIKCVPQADVEWKFYDAQPCSDKAYKIEELFYSYATHSDKFTDGVCLFWNCNVDRYPANSIVC…	mRNA#11160_1_copies:polyA_is_-1 coordinates are BetaCoV/England/02/2020; mRNA#11933_1_copies:polyA_is_-1 coordinates are BetaCoV/England/02/2020; mRNA#69581_1_copies:polyA_is_-1 coordinates are BetaCoV/England/02/2020; mRNA#42154_1_copies:polyA_is_-1 coordinates are BetaCoV/England/02/2020; mRNA#42313_1_copies:polyA_is_-1 coordinates are BetaCoV/England/02/2020; mRNA#61817_1_copies:polyA_is_-1 co…
SARS2_pp1ab_nsp14	2	136	147	VSAKPPPGDQFK	AENVTGLFKDCSKVITGLHPTQAPTHLSVDTKFKTEGLCVDIPGIPKDMTYRRLISMMGFKMNYQVNGYPNMFITREEAIRHVRAWIGFDVEGCHATREAVGTNLPLQLGFSTGVNLVAVPTGYVDTPNNTDFSRVSAKPPPGDQFKHLIPLMYKGLPWNVVRIKIVQMLSDTLKNLSDRVVFVLWAHGFELTSMKYFVKIGPERTCCLCDRRATCFSTASDTYACWHHSIGFDYVYNPFMIDVQQWGFTGNLQSNHDLYCQVHGNAHVASCDAIMTRCLAVHECFVKRVDWTIEYPIIGDELKINAACRKVQHMVVKAALLADKFPVLHDIGNPKAIKCVPQADVEWKFYDAQPCSDKAYKIEELFYSYATHSDKFTDGVCLFWNCNVDRYPANSIVC…	mRNA#11160_1_copies:polyA_is_-1 coordinates are BetaCoV/England/02/2020; mRNA#69581_1_copies:polyA_is_-1 coordinates are BetaCoV/England/02/2020; mRNA#42154_1_copies:polyA_is_-1 coordinates are BetaCoV/England/02/2020; mRNA#42313_1_copies:polyA_is_-1 coordinates are BetaCoV/England/02/2020; mRNA#61817_1_copies:polyA_is_-1 coordinates are BetaCoV/England/02/2020; mRNA#12838_1_copies:polyA_is_-1 co…
SARS2_pp1ab_nsp14	2	156	163	GLPWNVVR	AENVTGLFKDCSKVITGLHPTQAPTHLSVDTKFKTEGLCVDIPGIPKDMTYRRLISMMGFKMNYQVNGYPNMFITREEAIRHVRAWIGFDVEGCHATREAVGTNLPLQLGFSTGVNLVAVPTGYVDTPNNTDFSRVSAKPPPGDQFKHLIPLMYKGLPWNVVRIKIVQMLSDTLKNLSDRVVFVLWAHGFELTSMKYFVKIGPERTCCLCDRRATCFSTASDTYACWHHSIGFDYVYNPFMIDVQQWGFTGNLQSNHDLYCQVHGNAHVASCDAIMTRCLAVHECFVKRVDWTIEYPIIGDELKINAACRKVQHMVVKAALLADKFPVLHDIGNPKAIKCVPQADVEWKFYDAQPCSDKAYKIEELFYSYATHSDKFTDGVCLFWNCNVDRYPANSIVC…	mRNA#70474_1_copies:polyA_is_-1 coordinates are BetaCoV/England/02/2020; mRNA#11160_1_copies:polyA_is_-1 coordinates are BetaCoV/England/02/2020; mRNA#69581_1_copies:polyA_is_-1 coordinates are BetaCoV/England/02/2020; mRNA#42154_1_copies:polyA_is_-1 coordinates are BetaCoV/England/02/2020; mRNA#42313_1_copies:polyA_is_-1 coordinates are BetaCoV/England/02/2020; mRNA#46299_1_copies:polyA_is_-1 co…
SARS2_pp1ab_nsp14	1	279	288	CLAVHECFVK	AENVTGLFKDCSKVITGLHPTQAPTHLSVDTKFKTEGLCVDIPGIPKDMTYRRLISMMGFKMNYQVNGYPNMFITREEAIRHVRAWIGFDVEGCHATREAVGTNLPLQLGFSTGVNLVAVPTGYVDTPNNTDFSRVSAKPPPGDQFKHLIPLMYKGLPWNVVRIKIVQMLSDTLKNLSDRVVFVLWAHGFELTSMKYFVKIGPERTCCLCDRRATCFSTASDTYACWHHSIGFDYVYNPFMIDVQQWGFTGNLQSNHDLYCQVHGNAHVASCDAIMTRCLAVHECFVKRVDWTIEYPIIGDELKINAACRKVQHMVVKAALLADKFPVLHDIGNPKAIKCVPQADVEWKFYDAQPCSDKAYKIEELFYSYATHSDKFTDGVCLFWNCNVDRYPANSIVC…	mRNA#70474_1_copies:polyA_is_-1 coordinates are BetaCoV/England/02/2020; mRNA#11160_1_copies:polyA_is_-1 coordinates are BetaCoV/England/02/2020; mRNA#69581_1_copies:polyA_is_-1 coordinates are BetaCoV/England/02/2020; mRNA#42154_1_copies:polyA_is_-1 coordinates are BetaCoV/England/02/2020; mRNA#42313_1_copies:polyA_is_-1 coordinates are BetaCoV/England/02/2020; mRNA#61817_1_copies:polyA_is_-1 co…
SARS2_pp1ab_nsp14	1	289	304	RVDWTIEYPIIGDELK	AENVTGLFKDCSKVITGLHPTQAPTHLSVDTKFKTEGLCVDIPGIPKDMTYRRLISMMGFKMNYQVNGYPNMFITREEAIRHVRAWIGFDVEGCHATREAVGTNLPLQLGFSTGVNLVAVPTGYVDTPNNTDFSRVSAKPPPGDQFKHLIPLMYKGLPWNVVRIKIVQMLSDTLKNLSDRVVFVLWAHGFELTSMKYFVKIGPERTCCLCDRRATCFSTASDTYACWHHSIGFDYVYNPFMIDVQQWGFTGNLQSNHDLYCQVHGNAHVASCDAIMTRCLAVHECFVKRVDWTIEYPIIGDELKINAACRKVQHMVVKAALLADKFPVLHDIGNPKAIKCVPQADVEWKFYDAQPCSDKAYKIEELFYSYATHSDKFTDGVCLFWNCNVDRYPANSIVC…	mRNA#11160_1_copies:polyA_is_-1 coordinates are BetaCoV/England/02/2020; mRNA#69581_1_copies:polyA_is_-1 coordinates are BetaCoV/England/02/2020; mRNA#42154_1_copies:polyA_is_-1 coordinates are BetaCoV/England/02/2020; mRNA#42313_1_copies:polyA_is_-1 coordinates are BetaCoV/England/02/2020; mRNA#61817_1_copies:polyA_is_-1 coordinates are BetaCoV/England/02/2020; mRNA#75743_1_copies:polyA_is_-1 co…
SARS2_pp1ab_nsp14	3	319	336	AALLADKFPVLHDIGNPK	AENVTGLFKDCSKVITGLHPTQAPTHLSVDTKFKTEGLCVDIPGIPKDMTYRRLISMMGFKMNYQVNGYPNMFITREEAIRHVRAWIGFDVEGCHATREAVGTNLPLQLGFSTGVNLVAVPTGYVDTPNNTDFSRVSAKPPPGDQFKHLIPLMYKGLPWNVVRIKIVQMLSDTLKNLSDRVVFVLWAHGFELTSMKYFVKIGPERTCCLCDRRATCFSTASDTYACWHHSIGFDYVYNPFMIDVQQWGFTGNLQSNHDLYCQVHGNAHVASCDAIMTRCLAVHECFVKRVDWTIEYPIIGDELKINAACRKVQHMVVKAALLADKFPVLHDIGNPKAIKCVPQADVEWKFYDAQPCSDKAYKIEELFYSYATHSDKFTDGVCLFWNCNVDRYPANSIVC…	mRNA#11160_1_copies:polyA_is_-1 coordinates are BetaCoV/England/02/2020; mRNA#69581_1_copies:polyA_is_-1 coordinates are BetaCoV/England/02/2020; mRNA#42154_1_copies:polyA_is_-1 coordinates are BetaCoV/England/02/2020; mRNA#42313_1_copies:polyA_is_-1 coordinates are BetaCoV/England/02/2020; mRNA#61817_1_copies:polyA_is_-1 coordinates are BetaCoV/England/02/2020; mRNA#12838_1_copies:polyA_is_-1 co…
SARS2_pp1ab_nsp14	1	350	359	FYDAQPCSDK	AENVTGLFKDCSKVITGLHPTQAPTHLSVDTKFKTEGLCVDIPGIPKDMTYRRLISMMGFKMNYQVNGYPNMFITREEAIRHVRAWIGFDVEGCHATREAVGTNLPLQLGFSTGVNLVAVPTGYVDTPNNTDFSRVSAKPPPGDQFKHLIPLMYKGLPWNVVRIKIVQMLSDTLKNLSDRVVFVLWAHGFELTSMKYFVKIGPERTCCLCDRRATCFSTASDTYACWHHSIGFDYVYNPFMIDVQQWGFTGNLQSNHDLYCQVHGNAHVASCDAIMTRCLAVHECFVKRVDWTIEYPIIGDELKINAACRKVQHMVVKAALLADKFPVLHDIGNPKAIKCVPQADVEWKFYDAQPCSDKAYKIEELFYSYATHSDKFTDGVCLFWNCNVDRYPANSIVC…	mRNA#11160_1_copies:polyA_is_-1 coordinates are BetaCoV/England/02/2020; mRNA#69581_1_copies:polyA_is_-1 coordinates are BetaCoV/England/02/2020; mRNA#42154_1_copies:polyA_is_-1 coordinates are BetaCoV/England/02/2020; mRNA#42313_1_copies:polyA_is_-1 coordinates are BetaCoV/England/02/2020; mRNA#61817_1_copies:polyA_is_-1 coordinates are BetaCoV/England/02/2020; mRNA#12838_1_copies:polyA_is_-1 co…
SARS2_pp1ab_nsp14	1	392	400	YPANSIVCR	AENVTGLFKDCSKVITGLHPTQAPTHLSVDTKFKTEGLCVDIPGIPKDMTYRRLISMMGFKMNYQVNGYPNMFITREEAIRHVRAWIGFDVEGCHATREAVGTNLPLQLGFSTGVNLVAVPTGYVDTPNNTDFSRVSAKPPPGDQFKHLIPLMYKGLPWNVVRIKIVQMLSDTLKNLSDRVVFVLWAHGFELTSMKYFVKIGPERTCCLCDRRATCFSTASDTYACWHHSIGFDYVYNPFMIDVQQWGFTGNLQSNHDLYCQVHGNAHVASCDAIMTRCLAVHECFVKRVDWTIEYPIIGDELKINAACRKVQHMVVKAALLADKFPVLHDIGNPKAIKCVPQADVEWKFYDAQPCSDKAYKIEELFYSYATHSDKFTDGVCLFWNCNVDRYPANSIVC…	mRNA#11160_1_copies:polyA_is_-1 coordinates are BetaCoV/England/02/2020; mRNA#69581_1_copies:polyA_is_-1 coordinates are BetaCoV/England/02/2020; mRNA#42154_1_copies:polyA_is_-1 coordinates are BetaCoV/England/02/2020; mRNA#42313_1_copies:polyA_is_-1 coordinates are BetaCoV/England/02/2020; mRNA#61817_1_copies:polyA_is_-1 coordinates are BetaCoV/England/02/2020; mRNA#12838_1_copies:polyA_is_-1 co…
SARS2_pp1ab_nsp14	1	424	433	HAFHTPAFDK	AENVTGLFKDCSKVITGLHPTQAPTHLSVDTKFKTEGLCVDIPGIPKDMTYRRLISMMGFKMNYQVNGYPNMFITREEAIRHVRAWIGFDVEGCHATREAVGTNLPLQLGFSTGVNLVAVPTGYVDTPNNTDFSRVSAKPPPGDQFKHLIPLMYKGLPWNVVRIKIVQMLSDTLKNLSDRVVFVLWAHGFELTSMKYFVKIGPERTCCLCDRRATCFSTASDTYACWHHSIGFDYVYNPFMIDVQQWGFTGNLQSNHDLYCQVHGNAHVASCDAIMTRCLAVHECFVKRVDWTIEYPIIGDELKINAACRKVQHMVVKAALLADKFPVLHDIGNPKAIKCVPQADVEWKFYDAQPCSDKAYKIEELFYSYATHSDKFTDGVCLFWNCNVDRYPANSIVC…	mRNA#11160_1_copies:polyA_is_-1 coordinates are BetaCoV/England/02/2020; mRNA#69581_1_copies:polyA_is_-1 coordinates are BetaCoV/England/02/2020; mRNA#42154_1_copies:polyA_is_-1 coordinates are BetaCoV/England/02/2020; mRNA#42313_1_copies:polyA_is_-1 coordinates are BetaCoV/England/02/2020; mRNA#61817_1_copies:polyA_is_-1 coordinates are BetaCoV/England/02/2020; mRNA#12838_1_copies:polyA_is_-1 co…
SARS2_pp1ab_nsp14	3	434	440	SAFVNLK	AENVTGLFKDCSKVITGLHPTQAPTHLSVDTKFKTEGLCVDIPGIPKDMTYRRLISMMGFKMNYQVNGYPNMFITREEAIRHVRAWIGFDVEGCHATREAVGTNLPLQLGFSTGVNLVAVPTGYVDTPNNTDFSRVSAKPPPGDQFKHLIPLMYKGLPWNVVRIKIVQMLSDTLKNLSDRVVFVLWAHGFELTSMKYFVKIGPERTCCLCDRRATCFSTASDTYACWHHSIGFDYVYNPFMIDVQQWGFTGNLQSNHDLYCQVHGNAHVASCDAIMTRCLAVHECFVKRVDWTIEYPIIGDELKINAACRKVQHMVVKAALLADKFPVLHDIGNPKAIKCVPQADVEWKFYDAQPCSDKAYKIEELFYSYATHSDKFTDGVCLFWNCNVDRYPANSIVC…	mRNA#11160_1_copies:polyA_is_-1 coordinates are BetaCoV/England/02/2020; mRNA#42154_1_copies:polyA_is_-1 coordinates are BetaCoV/England/02/2020; mRNA#42313_1_copies:polyA_is_-1 coordinates are BetaCoV/England/02/2020; mRNA#61817_1_copies:polyA_is_-1 coordinates are BetaCoV/England/02/2020; mRNA#12838_1_copies:polyA_is_-1 coordinates are BetaCoV/England/02/2020; mRNA#75743_1_copies:polyA_is_-1 co…
SARS2_pp1ab_nsp14	1	441	457	QLPFFYYSDSPCESHGK	AENVTGLFKDCSKVITGLHPTQAPTHLSVDTKFKTEGLCVDIPGIPKDMTYRRLISMMGFKMNYQVNGYPNMFITREEAIRHVRAWIGFDVEGCHATREAVGTNLPLQLGFSTGVNLVAVPTGYVDTPNNTDFSRVSAKPPPGDQFKHLIPLMYKGLPWNVVRIKIVQMLSDTLKNLSDRVVFVLWAHGFELTSMKYFVKIGPERTCCLCDRRATCFSTASDTYACWHHSIGFDYVYNPFMIDVQQWGFTGNLQSNHDLYCQVHGNAHVASCDAIMTRCLAVHECFVKRVDWTIEYPIIGDELKINAACRKVQHMVVKAALLADKFPVLHDIGNPKAIKCVPQADVEWKFYDAQPCSDKAYKIEELFYSYATHSDKFTDGVCLFWNCNVDRYPANSIVC…	mRNA#11160_1_copies:polyA_is_-1 coordinates are BetaCoV/England/02/2020; mRNA#42154_1_copies:polyA_is_-1 coordinates are BetaCoV/England/02/2020; mRNA#42313_1_copies:polyA_is_-1 coordinates are BetaCoV/England/02/2020; mRNA#61817_1_copies:polyA_is_-1 coordinates are BetaCoV/England/02/2020; mRNA#12838_1_copies:polyA_is_-1 coordinates are BetaCoV/England/02/2020; mRNA#75743_1_copies:polyA_is_-1 co…
SARS2_pp1ab_nsp14	5	458	469	QVVSDIDYVPLK	AENVTGLFKDCSKVITGLHPTQAPTHLSVDTKFKTEGLCVDIPGIPKDMTYRRLISMMGFKMNYQVNGYPNMFITREEAIRHVRAWIGFDVEGCHATREAVGTNLPLQLGFSTGVNLVAVPTGYVDTPNNTDFSRVSAKPPPGDQFKHLIPLMYKGLPWNVVRIKIVQMLSDTLKNLSDRVVFVLWAHGFELTSMKYFVKIGPERTCCLCDRRATCFSTASDTYACWHHSIGFDYVYNPFMIDVQQWGFTGNLQSNHDLYCQVHGNAHVASCDAIMTRCLAVHECFVKRVDWTIEYPIIGDELKINAACRKVQHMVVKAALLADKFPVLHDIGNPKAIKCVPQADVEWKFYDAQPCSDKAYKIEELFYSYATHSDKFTDGVCLFWNCNVDRYPANSIVC…	mRNA#11160_1_copies:polyA_is_-1 coordinates are BetaCoV/England/02/2020; mRNA#69581_1_copies:polyA_is_-1 coordinates are BetaCoV/England/02/2020; mRNA#42154_1_copies:polyA_is_-1 coordinates are BetaCoV/England/02/2020; mRNA#42313_1_copies:polyA_is_-1 coordinates are BetaCoV/England/02/2020; mRNA#61817_1_copies:polyA_is_-1 coordinates are BetaCoV/England/02/2020; mRNA#12838_1_copies:polyA_is_-1 co…
SARS2_pp1ab_nsp14	4	513	525	QFDTYNLWNTFTR	AENVTGLFKDCSKVITGLHPTQAPTHLSVDTKFKTEGLCVDIPGIPKDMTYRRLISMMGFKMNYQVNGYPNMFITREEAIRHVRAWIGFDVEGCHATREAVGTNLPLQLGFSTGVNLVAVPTGYVDTPNNTDFSRVSAKPPPGDQFKHLIPLMYKGLPWNVVRIKIVQMLSDTLKNLSDRVVFVLWAHGFELTSMKYFVKIGPERTCCLCDRRATCFSTASDTYACWHHSIGFDYVYNPFMIDVQQWGFTGNLQSNHDLYCQVHGNAHVASCDAIMTRCLAVHECFVKRVDWTIEYPIIGDELKINAACRKVQHMVVKAALLADKFPVLHDIGNPKAIKCVPQADVEWKFYDAQPCSDKAYKIEELFYSYATHSDKFTDGVCLFWNCNVDRYPANSIVC…	mRNA#11160_1_copies:polyA_is_-1 coordinates are BetaCoV/England/02/2020; mRNA#69581_1_copies:polyA_is_-1 coordinates are BetaCoV/England/02/2020; mRNA#42313_1_copies:polyA_is_-1 coordinates are BetaCoV/England/02/2020; mRNA#61817_1_copies:polyA_is_-1 coordinates are BetaCoV/England/02/2020; mRNA#75743_1_copies:polyA_is_-1 coordinates are BetaCoV/England/02/2020; mRNA#43982_1_copies:polyA_is_-1 co…
SARS2_pp1ab_nsp15	1	1	12	SLENVAFNVVNK	SLENVAFNVVNKGHFDGQQGEVPVSIINNTVYTKVDGVDVELFENKTTLPVNVAFELWAKRNIKPVPEVKILNNLGVDIAANTVIWDYKRDAPAHISTIGVCSMTDIAKKPTETICAPLTVFFDGRVDGQVDLFRNARNGVLITEGSVKGLQPSVGPKQASLNGVTLIGEAVKTQFNYYKKVDGVVQQLPETYFTQSRNLQEFKPRSQMEIDFLELAMDEFIERYKLEGYAFEHIVYGDFSHSQLGGLHLLIGLAKRFKESPFELEDFIPMDSTVKNYFITDAQTGSSKCVCSVIDLLLDDFVEIIKSQDLSVVSKVVKVTIDYTEISFMLWCKDGHVETFYPKLQ	SARS2_pp1ab_nsp15
SARS2_pp1ab_nsp15	3	13	34	GHFDGQQGEVPVSIINNTVYTK	SLENVAFNVVNKGHFDGQQGEVPVSIINNTVYTKVDGVDVELFENKTTLPVNVAFELWAKRNIKPVPEVKILNNLGVDIAANTVIWDYKRDAPAHISTIGVCSMTDIAKKPTETICAPLTVFFDGRVDGQVDLFRNARNGVLITEGSVKGLQPSVGPKQASLNGVTLIGEAVKTQFNYYKKVDGVVQQLPETYFTQSRNLQEFKPRSQMEIDFLELAMDEFIERYKLEGYAFEHIVYGDFSHSQLGGLHLLIGLAKRFKESPFELEDFIPMDSTVKNYFITDAQTGSSKCVCSVIDLLLDDFVEIIKSQDLSVVSKVVKVTIDYTEISFMLWCKDGHVETFYPKLQ	mRNA#11160_1_copies:polyA_is_-1 coordinates are BetaCoV/England/02/2020; mRNA#69581_1_copies:polyA_is_-1 coordinates are BetaCoV/England/02/2020; mRNA#42313_1_copies:polyA_is_-1 coordinates are BetaCoV/England/02/2020; mRNA#61817_1_copies:polyA_is_-1 coordinates are BetaCoV/England/02/2020; mRNA#75743_1_copies:polyA_is_-1 coordinates are BetaCoV/England/02/2020; mRNA#43982_1_copies:polyA_is_-1 co…
SARS2_pp1ab_nsp15	2	35	46	VDGVDVELFENK	SLENVAFNVVNKGHFDGQQGEVPVSIINNTVYTKVDGVDVELFENKTTLPVNVAFELWAKRNIKPVPEVKILNNLGVDIAANTVIWDYKRDAPAHISTIGVCSMTDIAKKPTETICAPLTVFFDGRVDGQVDLFRNARNGVLITEGSVKGLQPSVGPKQASLNGVTLIGEAVKTQFNYYKKVDGVVQQLPETYFTQSRNLQEFKPRSQMEIDFLELAMDEFIERYKLEGYAFEHIVYGDFSHSQLGGLHLLIGLAKRFKESPFELEDFIPMDSTVKNYFITDAQTGSSKCVCSVIDLLLDDFVEIIKSQDLSVVSKVVKVTIDYTEISFMLWCKDGHVETFYPKLQ	mRNA#11160_1_copies:polyA_is_-1 coordinates are BetaCoV/England/02/2020; mRNA#69581_1_copies:polyA_is_-1 coordinates are BetaCoV/England/02/2020; mRNA#42313_1_copies:polyA_is_-1 coordinates are BetaCoV/England/02/2020; mRNA#61817_1_copies:polyA_is_-1 coordinates are BetaCoV/England/02/2020; mRNA#75743_1_copies:polyA_is_-1 coordinates are BetaCoV/England/02/2020; mRNA#43982_1_copies:polyA_is_-1 co…
SARS2_pp1ab_nsp15	2	47	60	TTLPVNVAFELWAK	SLENVAFNVVNKGHFDGQQGEVPVSIINNTVYTKVDGVDVELFENKTTLPVNVAFELWAKRNIKPVPEVKILNNLGVDIAANTVIWDYKRDAPAHISTIGVCSMTDIAKKPTETICAPLTVFFDGRVDGQVDLFRNARNGVLITEGSVKGLQPSVGPKQASLNGVTLIGEAVKTQFNYYKKVDGVVQQLPETYFTQSRNLQEFKPRSQMEIDFLELAMDEFIERYKLEGYAFEHIVYGDFSHSQLGGLHLLIGLAKRFKESPFELEDFIPMDSTVKNYFITDAQTGSSKCVCSVIDLLLDDFVEIIKSQDLSVVSKVVKVTIDYTEISFMLWCKDGHVETFYPKLQ	mRNA#11160_1_copies:polyA_is_-1 coordinates are BetaCoV/England/02/2020; mRNA#69581_1_copies:polyA_is_-1 coordinates are BetaCoV/England/02/2020; mRNA#42313_1_copies:polyA_is_-1 coordinates are BetaCoV/England/02/2020; mRNA#61817_1_copies:polyA_is_-1 coordinates are BetaCoV/England/02/2020; mRNA#75743_1_copies:polyA_is_-1 coordinates are BetaCoV/England/02/2020; mRNA#43982_1_copies:polyA_is_-1 co…
SARS2_pp1ab_nsp15	2	62	70	NIKPVPEVK	SLENVAFNVVNKGHFDGQQGEVPVSIINNTVYTKVDGVDVELFENKTTLPVNVAFELWAKRNIKPVPEVKILNNLGVDIAANTVIWDYKRDAPAHISTIGVCSMTDIAKKPTETICAPLTVFFDGRVDGQVDLFRNARNGVLITEGSVKGLQPSVGPKQASLNGVTLIGEAVKTQFNYYKKVDGVVQQLPETYFTQSRNLQEFKPRSQMEIDFLELAMDEFIERYKLEGYAFEHIVYGDFSHSQLGGLHLLIGLAKRFKESPFELEDFIPMDSTVKNYFITDAQTGSSKCVCSVIDLLLDDFVEIIKSQDLSVVSKVVKVTIDYTEISFMLWCKDGHVETFYPKLQ	mRNA#11160_1_copies:polyA_is_-1 coordinates are BetaCoV/England/02/2020; mRNA#69581_1_copies:polyA_is_-1 coordinates are BetaCoV/England/02/2020; mRNA#42313_1_copies:polyA_is_-1 coordinates are BetaCoV/England/02/2020; mRNA#61817_1_copies:polyA_is_-1 coordinates are BetaCoV/England/02/2020; mRNA#75743_1_copies:polyA_is_-1 coordinates are BetaCoV/England/02/2020; mRNA#43982_1_copies:polyA_is_-1 co…
SARS2_pp1ab_nsp15	2	91	109	DAPAHISTIGVCSMTDIAK	SLENVAFNVVNKGHFDGQQGEVPVSIINNTVYTKVDGVDVELFENKTTLPVNVAFELWAKRNIKPVPEVKILNNLGVDIAANTVIWDYKRDAPAHISTIGVCSMTDIAKKPTETICAPLTVFFDGRVDGQVDLFRNARNGVLITEGSVKGLQPSVGPKQASLNGVTLIGEAVKTQFNYYKKVDGVVQQLPETYFTQSRNLQEFKPRSQMEIDFLELAMDEFIERYKLEGYAFEHIVYGDFSHSQLGGLHLLIGLAKRFKESPFELEDFIPMDSTVKNYFITDAQTGSSKCVCSVIDLLLDDFVEIIKSQDLSVVSKVVKVTIDYTEISFMLWCKDGHVETFYPKLQ	mRNA#11160_1_copies:polyA_is_-1 coordinates are BetaCoV/England/02/2020; mRNA#69581_1_copies:polyA_is_-1 coordinates are BetaCoV/England/02/2020; mRNA#42313_1_copies:polyA_is_-1 coordinates are BetaCoV/England/02/2020; mRNA#61817_1_copies:polyA_is_-1 coordinates are BetaCoV/England/02/2020; mRNA#75743_1_copies:polyA_is_-1 coordinates are BetaCoV/England/02/2020; mRNA#43982_1_copies:polyA_is_-1 co…
SARS2_pp1ab_nsp15	6	110	126	KPTETICAPLTVFFDGR	SLENVAFNVVNKGHFDGQQGEVPVSIINNTVYTKVDGVDVELFENKTTLPVNVAFELWAKRNIKPVPEVKILNNLGVDIAANTVIWDYKRDAPAHISTIGVCSMTDIAKKPTETICAPLTVFFDGRVDGQVDLFRNARNGVLITEGSVKGLQPSVGPKQASLNGVTLIGEAVKTQFNYYKKVDGVVQQLPETYFTQSRNLQEFKPRSQMEIDFLELAMDEFIERYKLEGYAFEHIVYGDFSHSQLGGLHLLIGLAKRFKESPFELEDFIPMDSTVKNYFITDAQTGSSKCVCSVIDLLLDDFVEIIKSQDLSVVSKVVKVTIDYTEISFMLWCKDGHVETFYPKLQ	mRNA#11160_1_copies:polyA_is_-1 coordinates are BetaCoV/England/02/2020; mRNA#69581_1_copies:polyA_is_-1 coordinates are BetaCoV/England/02/2020; mRNA#42313_1_copies:polyA_is_-1 coordinates are BetaCoV/England/02/2020; mRNA#61817_1_copies:polyA_is_-1 coordinates are BetaCoV/England/02/2020; mRNA#75743_1_copies:polyA_is_-1 coordinates are BetaCoV/England/02/2020; mRNA#43982_1_copies:polyA_is_-1 co…
SARS2_pp1ab_nsp15	4	127	135	VDGQVDLFR	SLENVAFNVVNKGHFDGQQGEVPVSIINNTVYTKVDGVDVELFENKTTLPVNVAFELWAKRNIKPVPEVKILNNLGVDIAANTVIWDYKRDAPAHISTIGVCSMTDIAKKPTETICAPLTVFFDGRVDGQVDLFRNARNGVLITEGSVKGLQPSVGPKQASLNGVTLIGEAVKTQFNYYKKVDGVVQQLPETYFTQSRNLQEFKPRSQMEIDFLELAMDEFIERYKLEGYAFEHIVYGDFSHSQLGGLHLLIGLAKRFKESPFELEDFIPMDSTVKNYFITDAQTGSSKCVCSVIDLLLDDFVEIIKSQDLSVVSKVVKVTIDYTEISFMLWCKDGHVETFYPKLQ	mRNA#11160_1_copies:polyA_is_-1 coordinates are BetaCoV/England/02/2020; mRNA#69581_1_copies:polyA_is_-1 coordinates are BetaCoV/England/02/2020; mRNA#42313_1_copies:polyA_is_-1 coordinates are BetaCoV/England/02/2020; mRNA#61817_1_copies:polyA_is_-1 coordinates are BetaCoV/England/02/2020; mRNA#75743_1_copies:polyA_is_-1 coordinates are BetaCoV/England/02/2020; mRNA#43982_1_copies:polyA_is_-1 co…
SARS2_pp1ab_nsp15	2	139	149	NGVLITEGSVK	SLENVAFNVVNKGHFDGQQGEVPVSIINNTVYTKVDGVDVELFENKTTLPVNVAFELWAKRNIKPVPEVKILNNLGVDIAANTVIWDYKRDAPAHISTIGVCSMTDIAKKPTETICAPLTVFFDGRVDGQVDLFRNARNGVLITEGSVKGLQPSVGPKQASLNGVTLIGEAVKTQFNYYKKVDGVVQQLPETYFTQSRNLQEFKPRSQMEIDFLELAMDEFIERYKLEGYAFEHIVYGDFSHSQLGGLHLLIGLAKRFKESPFELEDFIPMDSTVKNYFITDAQTGSSKCVCSVIDLLLDDFVEIIKSQDLSVVSKVVKVTIDYTEISFMLWCKDGHVETFYPKLQ	mRNA#11160_1_copies:polyA_is_-1 coordinates are BetaCoV/England/02/2020; mRNA#69581_1_copies:polyA_is_-1 coordinates are BetaCoV/England/02/2020; mRNA#42313_1_copies:polyA_is_-1 coordinates are BetaCoV/England/02/2020; mRNA#61817_1_copies:polyA_is_-1 coordinates are BetaCoV/England/02/2020; mRNA#75743_1_copies:polyA_is_-1 coordinates are BetaCoV/England/02/2020; mRNA#43982_1_copies:polyA_is_-1 co…
SARS2_pp1ab_nsp15	1	150	158	GLQPSVGPK	SLENVAFNVVNKGHFDGQQGEVPVSIINNTVYTKVDGVDVELFENKTTLPVNVAFELWAKRNIKPVPEVKILNNLGVDIAANTVIWDYKRDAPAHISTIGVCSMTDIAKKPTETICAPLTVFFDGRVDGQVDLFRNARNGVLITEGSVKGLQPSVGPKQASLNGVTLIGEAVKTQFNYYKKVDGVVQQLPETYFTQSRNLQEFKPRSQMEIDFLELAMDEFIERYKLEGYAFEHIVYGDFSHSQLGGLHLLIGLAKRFKESPFELEDFIPMDSTVKNYFITDAQTGSSKCVCSVIDLLLDDFVEIIKSQDLSVVSKVVKVTIDYTEISFMLWCKDGHVETFYPKLQ	mRNA#11160_1_copies:polyA_is_-1 coordinates are BetaCoV/England/02/2020; mRNA#69581_1_copies:polyA_is_-1 coordinates are BetaCoV/England/02/2020; mRNA#42313_1_copies:polyA_is_-1 coordinates are BetaCoV/England/02/2020; mRNA#61817_1_copies:polyA_is_-1 coordinates are BetaCoV/England/02/2020; mRNA#75743_1_copies:polyA_is_-1 coordinates are BetaCoV/England/02/2020; mRNA#43982_1_copies:polyA_is_-1 co…
SARS2_pp1ab_nsp15	1	159	173	QASLNGVTLIGEAVK	SLENVAFNVVNKGHFDGQQGEVPVSIINNTVYTKVDGVDVELFENKTTLPVNVAFELWAKRNIKPVPEVKILNNLGVDIAANTVIWDYKRDAPAHISTIGVCSMTDIAKKPTETICAPLTVFFDGRVDGQVDLFRNARNGVLITEGSVKGLQPSVGPKQASLNGVTLIGEAVKTQFNYYKKVDGVVQQLPETYFTQSRNLQEFKPRSQMEIDFLELAMDEFIERYKLEGYAFEHIVYGDFSHSQLGGLHLLIGLAKRFKESPFELEDFIPMDSTVKNYFITDAQTGSSKCVCSVIDLLLDDFVEIIKSQDLSVVSKVVKVTIDYTEISFMLWCKDGHVETFYPKLQ	mRNA#11160_1_copies:polyA_is_-1 coordinates are BetaCoV/England/02/2020; mRNA#69581_1_copies:polyA_is_-1 coordinates are BetaCoV/England/02/2020; mRNA#42313_1_copies:polyA_is_-1 coordinates are BetaCoV/England/02/2020; mRNA#61817_1_copies:polyA_is_-1 coordinates are BetaCoV/England/02/2020; mRNA#43982_1_copies:polyA_is_-1 coordinates are BetaCoV/England/02/2020; SARS2_pp1ab_nsp15; mRNA#40862_1_co…
SARS2_pp1ab_nsp15	2	174	180	TQFNYYK	SLENVAFNVVNKGHFDGQQGEVPVSIINNTVYTKVDGVDVELFENKTTLPVNVAFELWAKRNIKPVPEVKILNNLGVDIAANTVIWDYKRDAPAHISTIGVCSMTDIAKKPTETICAPLTVFFDGRVDGQVDLFRNARNGVLITEGSVKGLQPSVGPKQASLNGVTLIGEAVKTQFNYYKKVDGVVQQLPETYFTQSRNLQEFKPRSQMEIDFLELAMDEFIERYKLEGYAFEHIVYGDFSHSQLGGLHLLIGLAKRFKESPFELEDFIPMDSTVKNYFITDAQTGSSKCVCSVIDLLLDDFVEIIKSQDLSVVSKVVKVTIDYTEISFMLWCKDGHVETFYPKLQ	mRNA#11160_1_copies:polyA_is_-1 coordinates are BetaCoV/England/02/2020; mRNA#69581_1_copies:polyA_is_-1 coordinates are BetaCoV/England/02/2020; mRNA#42313_1_copies:polyA_is_-1 coordinates are BetaCoV/England/02/2020; mRNA#61817_1_copies:polyA_is_-1 coordinates are BetaCoV/England/02/2020; mRNA#43982_1_copies:polyA_is_-1 coordinates are BetaCoV/England/02/2020; SARS2_pp1ab_nsp15; mRNA#40862_1_co…
SARS2_pp1ab_nsp15	5	181	198	KVDGVVQQLPETYFTQSR	SLENVAFNVVNKGHFDGQQGEVPVSIINNTVYTKVDGVDVELFENKTTLPVNVAFELWAKRNIKPVPEVKILNNLGVDIAANTVIWDYKRDAPAHISTIGVCSMTDIAKKPTETICAPLTVFFDGRVDGQVDLFRNARNGVLITEGSVKGLQPSVGPKQASLNGVTLIGEAVKTQFNYYKKVDGVVQQLPETYFTQSRNLQEFKPRSQMEIDFLELAMDEFIERYKLEGYAFEHIVYGDFSHSQLGGLHLLIGLAKRFKESPFELEDFIPMDSTVKNYFITDAQTGSSKCVCSVIDLLLDDFVEIIKSQDLSVVSKVVKVTIDYTEISFMLWCKDGHVETFYPKLQ	mRNA#11160_1_copies:polyA_is_-1 coordinates are BetaCoV/England/02/2020; mRNA#69581_1_copies:polyA_is_-1 coordinates are BetaCoV/England/02/2020; mRNA#42313_1_copies:polyA_is_-1 coordinates are BetaCoV/England/02/2020; mRNA#61817_1_copies:polyA_is_-1 coordinates are BetaCoV/England/02/2020; mRNA#43982_1_copies:polyA_is_-1 coordinates are BetaCoV/England/02/2020; SARS2_pp1ab_nsp15; mRNA#37793_1_co…
SARS2_pp1ab_nsp15	2	182	198	VDGVVQQLPETYFTQSR	SLENVAFNVVNKGHFDGQQGEVPVSIINNTVYTKVDGVDVELFENKTTLPVNVAFELWAKRNIKPVPEVKILNNLGVDIAANTVIWDYKRDAPAHISTIGVCSMTDIAKKPTETICAPLTVFFDGRVDGQVDLFRNARNGVLITEGSVKGLQPSVGPKQASLNGVTLIGEAVKTQFNYYKKVDGVVQQLPETYFTQSRNLQEFKPRSQMEIDFLELAMDEFIERYKLEGYAFEHIVYGDFSHSQLGGLHLLIGLAKRFKESPFELEDFIPMDSTVKNYFITDAQTGSSKCVCSVIDLLLDDFVEIIKSQDLSVVSKVVKVTIDYTEISFMLWCKDGHVETFYPKLQ	mRNA#11160_1_copies:polyA_is_-1 coordinates are BetaCoV/England/02/2020; mRNA#69581_1_copies:polyA_is_-1 coordinates are BetaCoV/England/02/2020; mRNA#42313_1_copies:polyA_is_-1 coordinates are BetaCoV/England/02/2020; mRNA#61817_1_copies:polyA_is_-1 coordinates are BetaCoV/England/02/2020; mRNA#43982_1_copies:polyA_is_-1 coordinates are BetaCoV/England/02/2020; SARS2_pp1ab_nsp15; mRNA#37793_1_co…
SARS2_pp1ab_nsp15	1	199	206	NLQEFKPR	SLENVAFNVVNKGHFDGQQGEVPVSIINNTVYTKVDGVDVELFENKTTLPVNVAFELWAKRNIKPVPEVKILNNLGVDIAANTVIWDYKRDAPAHISTIGVCSMTDIAKKPTETICAPLTVFFDGRVDGQVDLFRNARNGVLITEGSVKGLQPSVGPKQASLNGVTLIGEAVKTQFNYYKKVDGVVQQLPETYFTQSRNLQEFKPRSQMEIDFLELAMDEFIERYKLEGYAFEHIVYGDFSHSQLGGLHLLIGLAKRFKESPFELEDFIPMDSTVKNYFITDAQTGSSKCVCSVIDLLLDDFVEIIKSQDLSVVSKVVKVTIDYTEISFMLWCKDGHVETFYPKLQ	mRNA#11160_1_copies:polyA_is_-1 coordinates are BetaCoV/England/02/2020; mRNA#69581_1_copies:polyA_is_-1 coordinates are BetaCoV/England/02/2020; mRNA#42313_1_copies:polyA_is_-1 coordinates are BetaCoV/England/02/2020; mRNA#61817_1_copies:polyA_is_-1 coordinates are BetaCoV/England/02/2020; mRNA#12838_1_copies:polyA_is_-1 coordinates are BetaCoV/England/02/2020; mRNA#43982_1_copies:polyA_is_-1 co…
SARS2_pp1ab_nsp15	3	258	276	FKESPFELEDFIPMDSTVK	SLENVAFNVVNKGHFDGQQGEVPVSIINNTVYTKVDGVDVELFENKTTLPVNVAFELWAKRNIKPVPEVKILNNLGVDIAANTVIWDYKRDAPAHISTIGVCSMTDIAKKPTETICAPLTVFFDGRVDGQVDLFRNARNGVLITEGSVKGLQPSVGPKQASLNGVTLIGEAVKTQFNYYKKVDGVVQQLPETYFTQSRNLQEFKPRSQMEIDFLELAMDEFIERYKLEGYAFEHIVYGDFSHSQLGGLHLLIGLAKRFKESPFELEDFIPMDSTVKNYFITDAQTGSSKCVCSVIDLLLDDFVEIIKSQDLSVVSKVVKVTIDYTEISFMLWCKDGHVETFYPKLQ	mRNA#11160_1_copies:polyA_is_-1 coordinates are BetaCoV/England/02/2020; mRNA#69581_1_copies:polyA_is_-1 coordinates are BetaCoV/England/02/2020; mRNA#61817_1_copies:polyA_is_-1 coordinates are BetaCoV/England/02/2020; mRNA#12838_1_copies:polyA_is_-1 coordinates are BetaCoV/England/02/2020; SARS2_pp1ab_nsp15; mRNA#40862_1_copies:polyA_is_-1 coordinates are BetaCoV/England/02/2020; mRNA#67817_1_co…
SARS2_pp1ab_nsp15	2	260	276	ESPFELEDFIPMDSTVK	SLENVAFNVVNKGHFDGQQGEVPVSIINNTVYTKVDGVDVELFENKTTLPVNVAFELWAKRNIKPVPEVKILNNLGVDIAANTVIWDYKRDAPAHISTIGVCSMTDIAKKPTETICAPLTVFFDGRVDGQVDLFRNARNGVLITEGSVKGLQPSVGPKQASLNGVTLIGEAVKTQFNYYKKVDGVVQQLPETYFTQSRNLQEFKPRSQMEIDFLELAMDEFIERYKLEGYAFEHIVYGDFSHSQLGGLHLLIGLAKRFKESPFELEDFIPMDSTVKNYFITDAQTGSSKCVCSVIDLLLDDFVEIIKSQDLSVVSKVVKVTIDYTEISFMLWCKDGHVETFYPKLQ	mRNA#11160_1_copies:polyA_is_-1 coordinates are BetaCoV/England/02/2020; mRNA#69581_1_copies:polyA_is_-1 coordinates are BetaCoV/England/02/2020; mRNA#61817_1_copies:polyA_is_-1 coordinates are BetaCoV/England/02/2020; mRNA#12838_1_copies:polyA_is_-1 coordinates are BetaCoV/England/02/2020; SARS2_pp1ab_nsp15; mRNA#40862_1_copies:polyA_is_-1 coordinates are BetaCoV/England/02/2020; mRNA#67817_1_co…
SARS2_pp1ab_nsp15	5	277	289	NYFITDAQTGSSK	SLENVAFNVVNKGHFDGQQGEVPVSIINNTVYTKVDGVDVELFENKTTLPVNVAFELWAKRNIKPVPEVKILNNLGVDIAANTVIWDYKRDAPAHISTIGVCSMTDIAKKPTETICAPLTVFFDGRVDGQVDLFRNARNGVLITEGSVKGLQPSVGPKQASLNGVTLIGEAVKTQFNYYKKVDGVVQQLPETYFTQSRNLQEFKPRSQMEIDFLELAMDEFIERYKLEGYAFEHIVYGDFSHSQLGGLHLLIGLAKRFKESPFELEDFIPMDSTVKNYFITDAQTGSSKCVCSVIDLLLDDFVEIIKSQDLSVVSKVVKVTIDYTEISFMLWCKDGHVETFYPKLQ	mRNA#11160_1_copies:polyA_is_-1 coordinates are BetaCoV/England/02/2020; mRNA#53087_1_copies:polyA_is_-1 coordinates are BetaCoV/England/02/2020; mRNA#69581_1_copies:polyA_is_-1 coordinates are BetaCoV/England/02/2020; mRNA#61817_1_copies:polyA_is_-1 coordinates are BetaCoV/England/02/2020; mRNA#12838_1_copies:polyA_is_-1 coordinates are BetaCoV/England/02/2020; SARS2_pp1ab_nsp15; mRNA#40862_1_co…
SARS2_pp1ab_nsp15	3	308	316	SQDLSVVSK	SLENVAFNVVNKGHFDGQQGEVPVSIINNTVYTKVDGVDVELFENKTTLPVNVAFELWAKRNIKPVPEVKILNNLGVDIAANTVIWDYKRDAPAHISTIGVCSMTDIAKKPTETICAPLTVFFDGRVDGQVDLFRNARNGVLITEGSVKGLQPSVGPKQASLNGVTLIGEAVKTQFNYYKKVDGVVQQLPETYFTQSRNLQEFKPRSQMEIDFLELAMDEFIERYKLEGYAFEHIVYGDFSHSQLGGLHLLIGLAKRFKESPFELEDFIPMDSTVKNYFITDAQTGSSKCVCSVIDLLLDDFVEIIKSQDLSVVSKVVKVTIDYTEISFMLWCKDGHVETFYPKLQ	mRNA#11160_1_copies:polyA_is_-1 coordinates are BetaCoV/England/02/2020; mRNA#69581_1_copies:polyA_is_-1 coordinates are BetaCoV/England/02/2020; mRNA#12838_1_copies:polyA_is_-1 coordinates are BetaCoV/England/02/2020; SARS2_pp1ab_nsp15; mRNA#40862_1_copies:polyA_is_-1 coordinates are BetaCoV/England/02/2020; mRNA#67817_1_copies:polyA_is_-1 coordinates are BetaCoV/England/02/2020; mRNA#33554_1_co…
SARS2_pp1ab_nsp15	1	335	344	DGHVETFYPK	SLENVAFNVVNKGHFDGQQGEVPVSIINNTVYTKVDGVDVELFENKTTLPVNVAFELWAKRNIKPVPEVKILNNLGVDIAANTVIWDYKRDAPAHISTIGVCSMTDIAKKPTETICAPLTVFFDGRVDGQVDLFRNARNGVLITEGSVKGLQPSVGPKQASLNGVTLIGEAVKTQFNYYKKVDGVVQQLPETYFTQSRNLQEFKPRSQMEIDFLELAMDEFIERYKLEGYAFEHIVYGDFSHSQLGGLHLLIGLAKRFKESPFELEDFIPMDSTVKNYFITDAQTGSSKCVCSVIDLLLDDFVEIIKSQDLSVVSKVVKVTIDYTEISFMLWCKDGHVETFYPKLQ	mRNA#11160_1_copies:polyA_is_-1 coordinates are BetaCoV/England/02/2020; mRNA#69581_1_copies:polyA_is_-1 coordinates are BetaCoV/England/02/2020; mRNA#63549_1_copies:polyA_is_-1 coordinates are BetaCoV/England/02/2020; mRNA#12838_1_copies:polyA_is_-1 coordinates are BetaCoV/England/02/2020; mRNA#41847_1_copies:polyA_is_-1 coordinates are BetaCoV/England/02/2020; mRNA#26100_1_copies:polyA_is_-1 co…
SARS2_pp1ab_nsp16	4	25	38	CDLQNYGDSATLPK	SSQAWQPGVAMPNLYKMQRMLLEKCDLQNYGDSATLPKGIMMNVAKYTQLCQYLNTLTLAVPYNMRVIHFGAGSDKGVAPGTAVLRQWLPTGTLLVDSDLNDFVSDADSTLIGDCATVHTANKWDLIISDMYDPKTKNVTKENDSKEGFFTYICGFIQQKLALGGSVAIKITEHSWNADLYKLMGHFAWWTAFVTNVNASSSEAFLIGCNYLGKPREQIDGYVMHANYIFWRNTNPIQLSSYSLFDMSKFPLKLRGTAVMSLKEGQINDMILSLLSKGRLIIRENNRVVISSDVLVNN	mRNA#11160_1_copies:polyA_is_-1 coordinates are BetaCoV/England/02/2020; mRNA#69581_1_copies:polyA_is_-1 coordinates are BetaCoV/England/02/2020; mRNA#63549_1_copies:polyA_is_-1 coordinates are BetaCoV/England/02/2020; mRNA#3260_4_copies:polyA_is_-1 coordinates are BetaCoV/England/02/2020; mRNA#12838_1_copies:polyA_is_-1 coordinates are BetaCoV/England/02/2020; mRNA#66528_1_copies:polyA_is_-1 coo…
SARS2_pp1ab_nsp16	1	47	66	YTQLCQYLNTLTLAVPYNMR	SSQAWQPGVAMPNLYKMQRMLLEKCDLQNYGDSATLPKGIMMNVAKYTQLCQYLNTLTLAVPYNMRVIHFGAGSDKGVAPGTAVLRQWLPTGTLLVDSDLNDFVSDADSTLIGDCATVHTANKWDLIISDMYDPKTKNVTKENDSKEGFFTYICGFIQQKLALGGSVAIKITEHSWNADLYKLMGHFAWWTAFVTNVNASSSEAFLIGCNYLGKPREQIDGYVMHANYIFWRNTNPIQLSSYSLFDMSKFPLKLRGTAVMSLKEGQINDMILSLLSKGRLIIRENNRVVISSDVLVNN	mRNA#11160_1_copies:polyA_is_-1 coordinates are BetaCoV/England/02/2020; mRNA#69581_1_copies:polyA_is_-1 coordinates are BetaCoV/England/02/2020; mRNA#63549_1_copies:polyA_is_-1 coordinates are BetaCoV/England/02/2020; mRNA#22593_1_copies:polyA_is_-1 coordinates are BetaCoV/England/02/2020; mRNA#3260_4_copies:polyA_is_-1 coordinates are BetaCoV/England/02/2020; mRNA#12838_1_copies:polyA_is_-1 coo…
SARS2_pp1ab_nsp16	2	67	76	VIHFGAGSDK	SSQAWQPGVAMPNLYKMQRMLLEKCDLQNYGDSATLPKGIMMNVAKYTQLCQYLNTLTLAVPYNMRVIHFGAGSDKGVAPGTAVLRQWLPTGTLLVDSDLNDFVSDADSTLIGDCATVHTANKWDLIISDMYDPKTKNVTKENDSKEGFFTYICGFIQQKLALGGSVAIKITEHSWNADLYKLMGHFAWWTAFVTNVNASSSEAFLIGCNYLGKPREQIDGYVMHANYIFWRNTNPIQLSSYSLFDMSKFPLKLRGTAVMSLKEGQINDMILSLLSKGRLIIRENNRVVISSDVLVNN	mRNA#11160_1_copies:polyA_is_-1 coordinates are BetaCoV/England/02/2020; mRNA#69581_1_copies:polyA_is_-1 coordinates are BetaCoV/England/02/2020; mRNA#63549_1_copies:polyA_is_-1 coordinates are BetaCoV/England/02/2020; mRNA#22593_1_copies:polyA_is_-1 coordinates are BetaCoV/England/02/2020; mRNA#3260_4_copies:polyA_is_-1 coordinates are BetaCoV/England/02/2020; mRNA#12838_1_copies:polyA_is_-1 coo…
SARS2_pp1ab_nsp16	1	67	86	VIHFGAGSDKGVAPGTAVLR	SSQAWQPGVAMPNLYKMQRMLLEKCDLQNYGDSATLPKGIMMNVAKYTQLCQYLNTLTLAVPYNMRVIHFGAGSDKGVAPGTAVLRQWLPTGTLLVDSDLNDFVSDADSTLIGDCATVHTANKWDLIISDMYDPKTKNVTKENDSKEGFFTYICGFIQQKLALGGSVAIKITEHSWNADLYKLMGHFAWWTAFVTNVNASSSEAFLIGCNYLGKPREQIDGYVMHANYIFWRNTNPIQLSSYSLFDMSKFPLKLRGTAVMSLKEGQINDMILSLLSKGRLIIRENNRVVISSDVLVNN	mRNA#11160_1_copies:polyA_is_-1 coordinates are BetaCoV/England/02/2020; mRNA#69581_1_copies:polyA_is_-1 coordinates are BetaCoV/England/02/2020; mRNA#63549_1_copies:polyA_is_-1 coordinates are BetaCoV/England/02/2020; mRNA#22593_1_copies:polyA_is_-1 coordinates are BetaCoV/England/02/2020; mRNA#3260_4_copies:polyA_is_-1 coordinates are BetaCoV/England/02/2020; mRNA#12838_1_copies:polyA_is_-1 coo…
SARS2_pp1ab_nsp16	5	77	86	GVAPGTAVLR	SSQAWQPGVAMPNLYKMQRMLLEKCDLQNYGDSATLPKGIMMNVAKYTQLCQYLNTLTLAVPYNMRVIHFGAGSDKGVAPGTAVLRQWLPTGTLLVDSDLNDFVSDADSTLIGDCATVHTANKWDLIISDMYDPKTKNVTKENDSKEGFFTYICGFIQQKLALGGSVAIKITEHSWNADLYKLMGHFAWWTAFVTNVNASSSEAFLIGCNYLGKPREQIDGYVMHANYIFWRNTNPIQLSSYSLFDMSKFPLKLRGTAVMSLKEGQINDMILSLLSKGRLIIRENNRVVISSDVLVNN	mRNA#11160_1_copies:polyA_is_-1 coordinates are BetaCoV/England/02/2020; mRNA#69581_1_copies:polyA_is_-1 coordinates are BetaCoV/England/02/2020; mRNA#63549_1_copies:polyA_is_-1 coordinates are BetaCoV/England/02/2020; mRNA#22593_1_copies:polyA_is_-1 coordinates are BetaCoV/England/02/2020; mRNA#3260_4_copies:polyA_is_-1 coordinates are BetaCoV/England/02/2020; mRNA#12838_1_copies:polyA_is_-1 coo…
SARS2_pp1ab_nsp16	1	124	135	WDLIISDMYDPK	SSQAWQPGVAMPNLYKMQRMLLEKCDLQNYGDSATLPKGIMMNVAKYTQLCQYLNTLTLAVPYNMRVIHFGAGSDKGVAPGTAVLRQWLPTGTLLVDSDLNDFVSDADSTLIGDCATVHTANKWDLIISDMYDPKTKNVTKENDSKEGFFTYICGFIQQKLALGGSVAIKITEHSWNADLYKLMGHFAWWTAFVTNVNASSSEAFLIGCNYLGKPREQIDGYVMHANYIFWRNTNPIQLSSYSLFDMSKFPLKLRGTAVMSLKEGQINDMILSLLSKGRLIIRENNRVVISSDVLVNN	mRNA#11160_1_copies:polyA_is_-1 coordinates are BetaCoV/England/02/2020; mRNA#69581_1_copies:polyA_is_-1 coordinates are BetaCoV/England/02/2020; mRNA#63549_1_copies:polyA_is_-1 coordinates are BetaCoV/England/02/2020; mRNA#22593_1_copies:polyA_is_-1 coordinates are BetaCoV/England/02/2020; mRNA#3260_4_copies:polyA_is_-1 coordinates are BetaCoV/England/02/2020; mRNA#12838_1_copies:polyA_is_-1 coo…
SARS2_pp1ab_nsp16	2	142	160	ENDSKEGFFTYICGFIQQK	SSQAWQPGVAMPNLYKMQRMLLEKCDLQNYGDSATLPKGIMMNVAKYTQLCQYLNTLTLAVPYNMRVIHFGAGSDKGVAPGTAVLRQWLPTGTLLVDSDLNDFVSDADSTLIGDCATVHTANKWDLIISDMYDPKTKNVTKENDSKEGFFTYICGFIQQKLALGGSVAIKITEHSWNADLYKLMGHFAWWTAFVTNVNASSSEAFLIGCNYLGKPREQIDGYVMHANYIFWRNTNPIQLSSYSLFDMSKFPLKLRGTAVMSLKEGQINDMILSLLSKGRLIIRENNRVVISSDVLVNN	mRNA#22593_1_copies:polyA_is_-1 coordinates are BetaCoV/England/02/2020; mRNA#3260_4_copies:polyA_is_-1 coordinates are BetaCoV/England/02/2020; mRNA#12838_1_copies:polyA_is_-1 coordinates are BetaCoV/England/02/2020; mRNA#66528_1_copies:polyA_is_-1 coordinates are BetaCoV/England/02/2020; mRNA#41847_1_copies:polyA_is_-1 coordinates are BetaCoV/England/02/2020; mRNA#26100_1_copies:polyA_is_-1 coo…
SARS2_pp1ab_nsp16	1	147	160	EGFFTYICGFIQQK	SSQAWQPGVAMPNLYKMQRMLLEKCDLQNYGDSATLPKGIMMNVAKYTQLCQYLNTLTLAVPYNMRVIHFGAGSDKGVAPGTAVLRQWLPTGTLLVDSDLNDFVSDADSTLIGDCATVHTANKWDLIISDMYDPKTKNVTKENDSKEGFFTYICGFIQQKLALGGSVAIKITEHSWNADLYKLMGHFAWWTAFVTNVNASSSEAFLIGCNYLGKPREQIDGYVMHANYIFWRNTNPIQLSSYSLFDMSKFPLKLRGTAVMSLKEGQINDMILSLLSKGRLIIRENNRVVISSDVLVNN	mRNA#22593_1_copies:polyA_is_-1 coordinates are BetaCoV/England/02/2020; mRNA#3260_4_copies:polyA_is_-1 coordinates are BetaCoV/England/02/2020; mRNA#12838_1_copies:polyA_is_-1 coordinates are BetaCoV/England/02/2020; mRNA#66528_1_copies:polyA_is_-1 coordinates are BetaCoV/England/02/2020; mRNA#41847_1_copies:polyA_is_-1 coordinates are BetaCoV/England/02/2020; mRNA#26100_1_copies:polyA_is_-1 coo…
SARS2_pp1ab_nsp16	1	161	170	LALGGSVAIK	SSQAWQPGVAMPNLYKMQRMLLEKCDLQNYGDSATLPKGIMMNVAKYTQLCQYLNTLTLAVPYNMRVIHFGAGSDKGVAPGTAVLRQWLPTGTLLVDSDLNDFVSDADSTLIGDCATVHTANKWDLIISDMYDPKTKNVTKENDSKEGFFTYICGFIQQKLALGGSVAIKITEHSWNADLYKLMGHFAWWTAFVTNVNASSSEAFLIGCNYLGKPREQIDGYVMHANYIFWRNTNPIQLSSYSLFDMSKFPLKLRGTAVMSLKEGQINDMILSLLSKGRLIIRENNRVVISSDVLVNN	mRNA#69581_1_copies:polyA_is_-1 coordinates are BetaCoV/England/02/2020; mRNA#22593_1_copies:polyA_is_-1 coordinates are BetaCoV/England/02/2020; mRNA#3260_4_copies:polyA_is_-1 coordinates are BetaCoV/England/02/2020; mRNA#12838_1_copies:polyA_is_-1 coordinates are BetaCoV/England/02/2020; mRNA#66528_1_copies:polyA_is_-1 coordinates are BetaCoV/England/02/2020; mRNA#41847_1_copies:polyA_is_-1 coo…
SARS2_pp1ab_nsp16	1	171	182	ITEHSWNADLYK	SSQAWQPGVAMPNLYKMQRMLLEKCDLQNYGDSATLPKGIMMNVAKYTQLCQYLNTLTLAVPYNMRVIHFGAGSDKGVAPGTAVLRQWLPTGTLLVDSDLNDFVSDADSTLIGDCATVHTANKWDLIISDMYDPKTKNVTKENDSKEGFFTYICGFIQQKLALGGSVAIKITEHSWNADLYKLMGHFAWWTAFVTNVNASSSEAFLIGCNYLGKPREQIDGYVMHANYIFWRNTNPIQLSSYSLFDMSKFPLKLRGTAVMSLKEGQINDMILSLLSKGRLIIRENNRVVISSDVLVNN	mRNA#69581_1_copies:polyA_is_-1 coordinates are BetaCoV/England/02/2020; mRNA#22593_1_copies:polyA_is_-1 coordinates are BetaCoV/England/02/2020; mRNA#3260_4_copies:polyA_is_-1 coordinates are BetaCoV/England/02/2020; mRNA#12838_1_copies:polyA_is_-1 coordinates are BetaCoV/England/02/2020; mRNA#66528_1_copies:polyA_is_-1 coordinates are BetaCoV/England/02/2020; mRNA#41847_1_copies:polyA_is_-1 coo…
SARS2_pp1ab_nsp16	2	217	232	EQIDGYVMHANYIFWR	SSQAWQPGVAMPNLYKMQRMLLEKCDLQNYGDSATLPKGIMMNVAKYTQLCQYLNTLTLAVPYNMRVIHFGAGSDKGVAPGTAVLRQWLPTGTLLVDSDLNDFVSDADSTLIGDCATVHTANKWDLIISDMYDPKTKNVTKENDSKEGFFTYICGFIQQKLALGGSVAIKITEHSWNADLYKLMGHFAWWTAFVTNVNASSSEAFLIGCNYLGKPREQIDGYVMHANYIFWRNTNPIQLSSYSLFDMSKFPLKLRGTAVMSLKEGQINDMILSLLSKGRLIIRENNRVVISSDVLVNN	mRNA#69581_1_copies:polyA_is_-1 coordinates are BetaCoV/England/02/2020; mRNA#22593_1_copies:polyA_is_-1 coordinates are BetaCoV/England/02/2020; mRNA#3260_4_copies:polyA_is_-1 coordinates are BetaCoV/England/02/2020; mRNA#12838_1_copies:polyA_is_-1 coordinates are BetaCoV/England/02/2020; mRNA#41847_1_copies:polyA_is_-1 coordinates are BetaCoV/England/02/2020; mRNA#26100_1_copies:polyA_is_-1 coo…
[truncated: 706 more rows]
